# Supplementary material
Source: Royal Society of Chemistry journal article supplement (doi:10.1039/d6ob00345a)
Supplement: d6ob00345a1.pdf [file d6ob00345a1.pdf]

## **Supplementary Information**

### **Dual Function of Cyanoacetic Acid under Visible Light and Dark Conditions: Templating and Catalyzing the Formation of Unexplored Pyrimidine Derivatives and Evaluation of their Antibacterial Activity**

Shivangi<sup>a†</sup>, Susital Mal<sup>a†</sup>, and Subrata Das<sup>\*</sup>

<sup>a</sup> National Institute of Technology Patna, Bihar 800005, India.

<sup>†</sup> These authors contributed equally to this work.

<sup>\*</sup> subratad@nitp.ac.in

## Contents

|                                                                                                                                  |     |
|----------------------------------------------------------------------------------------------------------------------------------|-----|
| 1. General information.....                                                                                                      | S3  |
| 1.1 Materials and methods .....                                                                                                  | S3  |
| 1.2 Instrumentation .....                                                                                                        | S3  |
| 2. Structure of starting materials .....                                                                                         | S4  |
| 3. Unsuccessful aldehydes for the synthesis of pyridopyrimidines.....                                                            | S4  |
| 4. Preparation and characterization data of starting materials.....                                                              | S5  |
| 5. Falling film looping photo-reactor set up for the photo-induced reactions .....                                               | S6  |
| 6. General procedure and characterization data for the synthesis of pyridopyrimidines/series 4..<br>.....                        | S8  |
| 7. General procedure and characterization data of series 5 .....                                                                 | S16 |
| 8. Controlled reaction for the mechanism study .....                                                                             | S25 |
| 8.1 Radical trapping reaction .....                                                                                              |     |
| 8.2 UV-visible analysis.....                                                                                                     |     |
| 8.3 TD-DFT study .....                                                                                                           |     |
| 9. General procedure for cyclic voltammetry study.....                                                                           | S33 |
| 10. Possible reaction mechanism in the dark condition.....                                                                       | S35 |
| 11. HRMS data for detecting the key intermediates in the case of two equivalent of cyanoacetic<br>acid under dark condition..... | S35 |
| 12. Atom-economy for both products.....                                                                                          | S37 |
| 13. Single crystal X-Ray analysis.....                                                                                           | S39 |
| 14. Experimental antibacterial study.....                                                                                        | S34 |
| 14.1 Experimental procedure of antibacterial activity.....                                                                       |     |
| 14.2 Stability of the compound.....                                                                                              |     |
| 15. References .....                                                                                                             | S68 |
| 16. Copies of NMR Spectra .....                                                                                                  | S69 |

# 1. General information

## 1.1 Materials and methods

All chemicals were purchased from companies as follows: water: Milli-Q; HPLC grade acetonitrile: Merck; Cyanoacetic acid: Sigma; Aldehydes: Avra and CDH; Hexane, Ethyl acetate: SRL; DMSO- $d_6$ : Cambridge isotope laboratories. All experiments were performed in oven-dried glassware under an air atmosphere. Reagents were used directly without purification. All the solvents were purified before use. Starting materials **1a**, **1b**, **1c**, and **1d** were prepared using reported procedures. Analytical thin-layer chromatography (TLC) was conducted on plates (GF-254) Merck silica gel 60 F<sub>254</sub> and visualization was by ultraviolet fluorescence ( $\lambda = 254$  nm).

## 1.2 Instrumentation

**NMR spectra:**  $^1\text{H}$ -NMR and  $^{13}\text{C}$ -NMR spectra were recorded using a Bruker 500 MHz & 400 MHz FT-NMR spectrometer in  $\text{CDCl}_3$  and  $\text{DMSO-}d_6$  solvents. Chemical shifts are reported in parts per million (ppm). Data are reported as follows: chemical shift  $\delta$ /ppm, coupling constants J in Hz, multiplicity (s = singlet, d = doublet, t = triplet, q = quartet, m = multiplet. Detailed information about all the instruments used is mentioned in the following table.

| Equipment                                   | Model                     | Suppliers |
|---------------------------------------------|---------------------------|-----------|
| 1) Rotavapor                                | Rotavapor R-100           | BUCHI     |
| 2) 400 MHz NMR spectrometer                 | ECZ500R/S1                | JEOL      |
| 3) 500 MHz NMR spectrometer                 | ECZ500R                   | JEOL      |
| 4) UV-VIS Spectrophotometer                 | UV-1780                   | Shimadzu  |
| 5) High-Resolution Mass Spectrometer (HRMS) | G2-XS QTQF                | XEVO      |
| 6) Single crystal-XRD                       | D8 Venture Diffractometer | Bruker    |

## 2. Structure of starting materials

### Uracil Derivatives

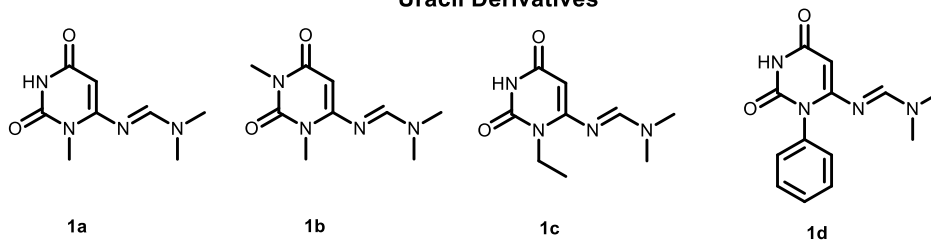

### Aldehydes

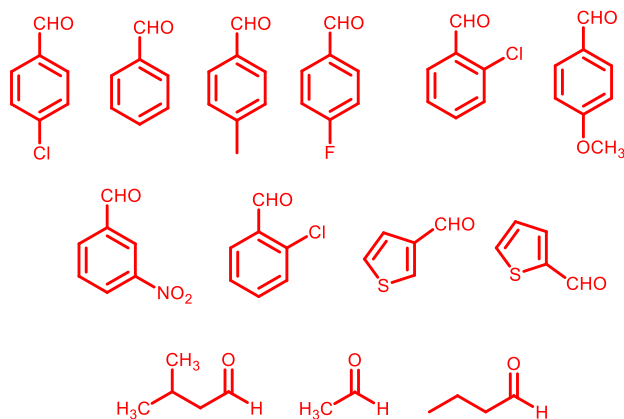

## 3. Unsuccessful aldehydes for the synthesis of pyridopyrimidines

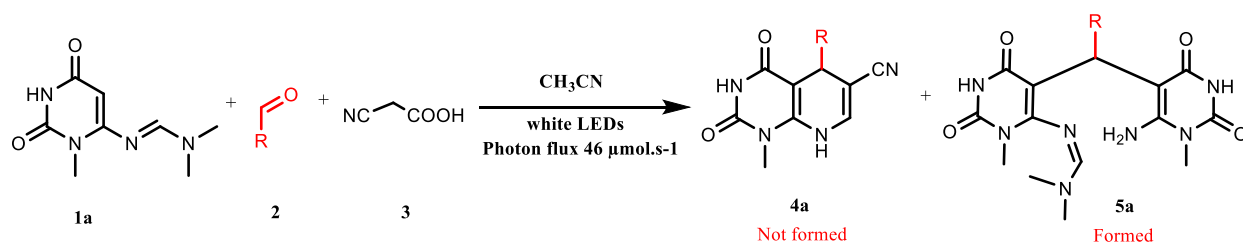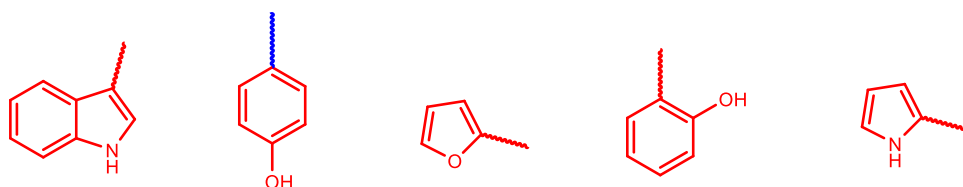

## 4. Preparation and characterization data of starting materials

### 4.1 Synthesis of N, N-dimethyl-N'-(3-methyl-2,6-dioxo-1,2,3,6-tetrahydropyrimidin-4-yl)formimidamide (1a):

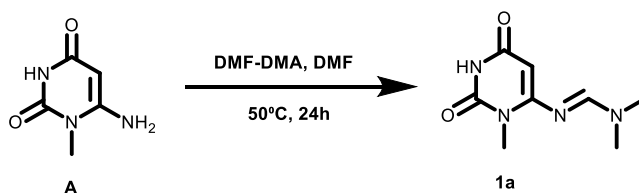

A mixture of 1-methyl-6-aminouracil (**A**, 10 mmol, 1 equiv.) and DMF-DMA (20 mmol, 2 equiv.) was dissolved in 50 mL of DMF and heated at 40-50°C for 24h in an oil bath. Then, excess DMF and DMF-DMA were filtered off and washed with diethyl ether, and the crude product was dried in a vacuum oven.<sup>1</sup>

<sup>1</sup>H-NMR (400 MHz, DMSO-d<sub>6</sub>) δ: 10.62 (s, 1H), 8.02 (s, 1H), 4.95 (s, 1H), 3.20 (s, 3H), 3.09 (s, 3H), 2.97 (s, 3H). <sup>13</sup>C-NMR (101 MHz, DMSO-d<sub>6</sub>) δ: 163.61, 161.24, 156.26, 152.33, 82.71, 40.76, 34.86, 29.10.

### 4.2 Synthesis of N'-(1,3-dimethyl-2,6-dioxo-1,2,3,6-tetrahydropyrimidin-4-yl)-N,N-dimethylformimidamide (1b):

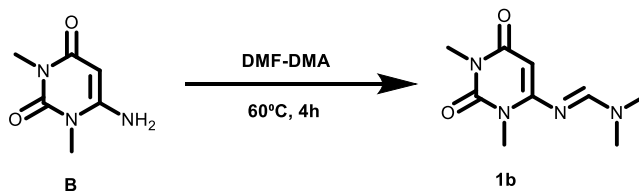

A 25 mL round bottom flask was filled with 1,3-dimethyl-6-aminouracil (**B**, 10 mmol), and the flask was immersed in a hot oil bath at 60°C. Then, 10 ml of DMF-DMA was added dropwise for 30 minutes duration and allowed for another 4 hours at 60°C. Then it was cooled, and the obtained residue was recrystallized in ethanol.<sup>2</sup>

### 4.3 Synthesis of N'-(3-ethyl-2,6-dioxo-1,2,3,6-tetrahydropyrimidin-4-yl)-N,N-dimethylformimidamide (1c):

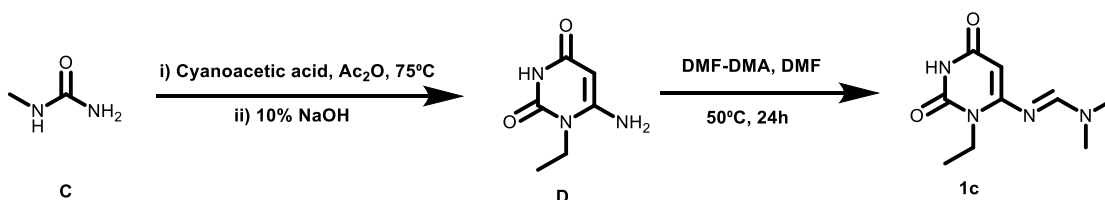

**Procedure for D:** A mixture of N-ethylurea (**C**, 10 mmol), cyanoacetic acid (10.1 mmol), and 5 ml of acetic anhydride was heated at 75°C for two hours. The resulting mixture was cooled, and 50 mL of diethyl ether was added and allowed to stand for 2 hours in an ice bath. The resulting precipitate was filtered off and gradually washed with diethyl ether. The resultant air-dried precipitate was dissolved in water/ethanol (2:1),

and the 10% aqueous NaOH solution was continuously added. The mixture was continuously stirred at 85°C, and the aminouracil precipitate gradually separated. Finally, the obtained crude product (**D**) was filtered off, washed with water, and dried in a vacuum oven.<sup>3</sup>

**Procedure for 1c:** A mixture of 1-ethyl-6-aminouracil (**D**, 5 mmol, 1equiv.) and DMF-DMA (7.5 mmol, 1.5equiv.) was dissolved in 25 mL of DMF. The mixture was heated at 45-50°C for 24h in an oil bath. Following this time, excess DMF was dried in a vacuum oven, and diethyl ether was added. The obtained white precipitate (**1c**) was filtered off, washed with diethyl ether, and dried in a vacuum oven.<sup>4</sup>

<sup>1</sup>H-NMR (500 MHz, DMSO-d<sub>6</sub>) δ: 10.59 (s, 1H), 8.06 (s, 1H), 4.96 (s, 1H), 3.90 (q, *J* = 7.0 Hz, 2H), 3.11 (s, 3H), 2.99 (s, 3H), 1.08 (t, *J* = 6.9 Hz, 3H). <sup>13</sup>C-NMR (126 MHz, DMSO-d<sub>6</sub>) δ: 163.68, 160.88, 156.42, 151.93, 82.83, 40.77, 36.91, 34.86, 14.30.

#### 4.4 Synthesis of N'-(2,6-dioxo-3-phenyl-1,2,3,6-tetrahydropyrimidin-4-yl)-N,N-dimethylformimidamide (**1d**):

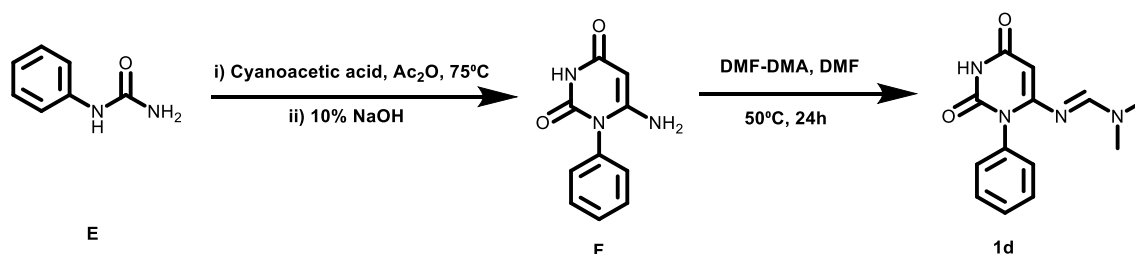

**Procedure for F:** A mixture of N-phenylurea (**E**, 10 mmol), cyanoacetic acid (10.1 mmol), and 5 ml of acetic anhydride was heated at 75°C for two hours. The resulting mixture was cooled, 50 ml of diethyl ether was added, and it was allowed to stand for 2 hours in an ice bath. The resulting precipitate was filtered off and gradually washed with diethyl ether. The resultant air-dried precipitate was dissolved in water/ethanol (2:1), and the 10% aqueous NaOH solution was continuously added. The mixture was continuously stirred at 85°C, and the aminouracil precipitate gradually separated. Finally, the obtained crude product (**F**) was filtered off, washed with water, and dried in a vacuum oven.<sup>3</sup>

**Procedure for 1d:** A mixture of 1-phenyl-6-aminouracil (**F**, 5 mmol, 1 equiv.) and DMF-DMA (7.5 mmol, 1.5 equiv.) was dissolved in 25 mL of DMF. The mixture was heated at 40-50°C for 24h in an oil bath. Following this time, excess DMF was dried in a vacuum oven, and diethyl was added. The obtained white precipitate (**1d**) was filtered off, washed with diethyl ether, and dried in a vacuum oven.<sup>2</sup>

<sup>1</sup>H-NMR (500 MHz, DMSO-d<sub>6</sub>) δ: 10.74 (s, 1H), 7.92 (s, 1H), 7.32 (dt, *J* = 7.9 Hz, 3H), 7.13 (t, *J* = 5.4 Hz, 2H), 5.06 (s, 1H), 2.95 (s, 3H), 2.48 (s, 3H). <sup>13</sup>C-NMR (126 MHz, DMSO-d<sub>6</sub>) δ: 164.08, 161.42, 155.65, 151.98, 137.57, 129.97, 128.70, 127.95, 82.70, 34.34.

## 5. Falling film looping photo-reactor set up for the photo-induced reactions

The reactions were carried out in a falling film looping photoreactor, designed and developed by our group.<sup>5</sup> It was designed to perform small-scale laboratory experiments in looping falling film batch mode or in only batch mode. It was photonicly characterised and allows researchers to optimize a lab-scale reaction to various space velocities and/or photon fluxes (for falling film looping batch operations/batch operations). Thus, also confirms the scalability of the process by using different proportionally scaled versions of the reactor module (1A, 2A, and 4A) and maintaining a constant photon-to-reactant ratio. In this case, we used

only 1A reactor module in batch operation for all the reactions. The reactor mainly contains six different modules: the irradiation module, reactor module, pump module, controller module, cooling module, and case module. In our published research article, we provide all the

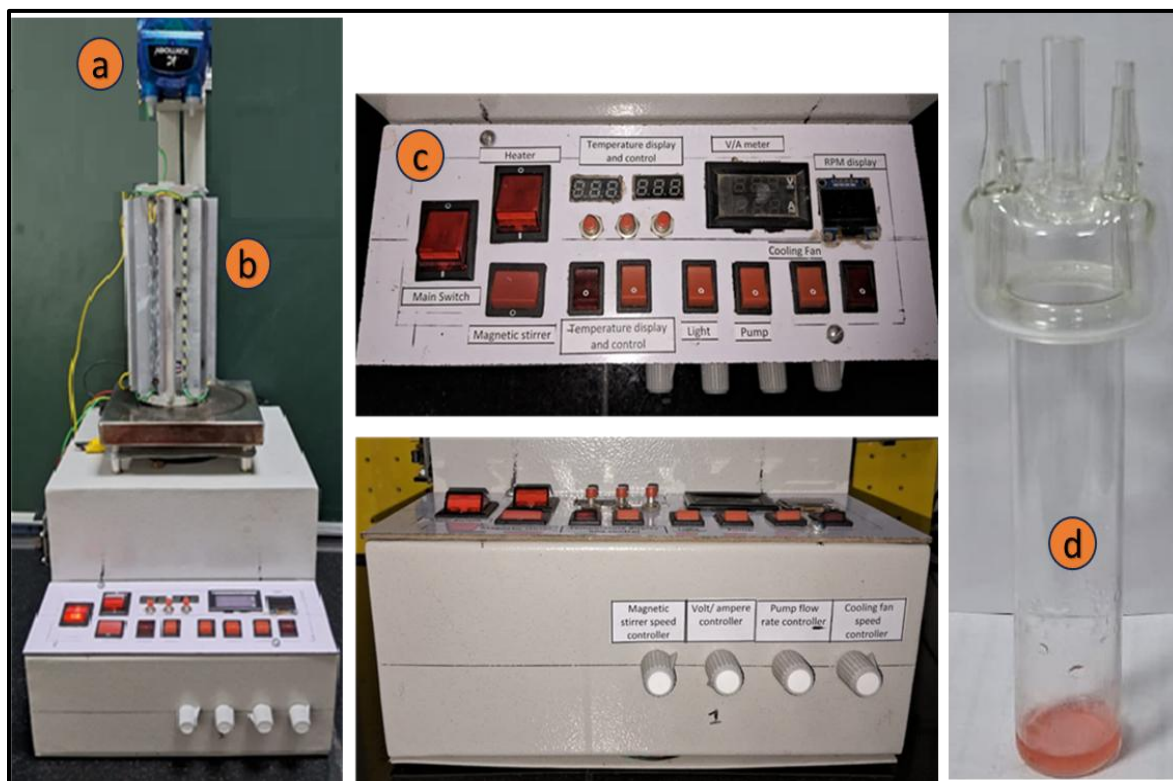

**Figure S1.** Falling film looping photoreactor consisting of a) pump module, b) irradiation module, c) controller module, and d) reactor module.

**Table S1.** Optical properties of 1A, 2A and 4A irradiation modules with respect to different reactor modules.

| Reactor module | Wetted surface<br>A / cm <sup>2</sup> | Number of LEDs | Electrical current /<br>A | Current per LED /<br>mA | Total photon flux / $\mu\text{mol} \cdot \text{s}^{-1}$ | Total radiant power<br>P/ W | Irradiance<br>E / mW · cm <sup>2</sup> |
|----------------|---------------------------------------|----------------|---------------------------|-------------------------|---------------------------------------------------------|-----------------------------|----------------------------------------|
| 1×A            | 78.5                                  | 40             | 1                         | 71-77                   | 21                                                      | 4.71                        | 60.1                                   |
|                |                                       | 40             | 2                         | 143-154                 | 38                                                      | 8.56                        | 109.0                                  |
|                |                                       | 40             | 2.5                       | 179-192                 | 46                                                      | 10.32                       | 131.4                                  |
| 2×A            | 179.1                                 | 91             | 5                         | 177-183                 | 102                                                     | 22.81                       | 127.4                                  |
| 4×A            | 314.2                                 | 160            | 10                        | 185-189                 | 185                                                     | 41.27                       | 131.4                                  |

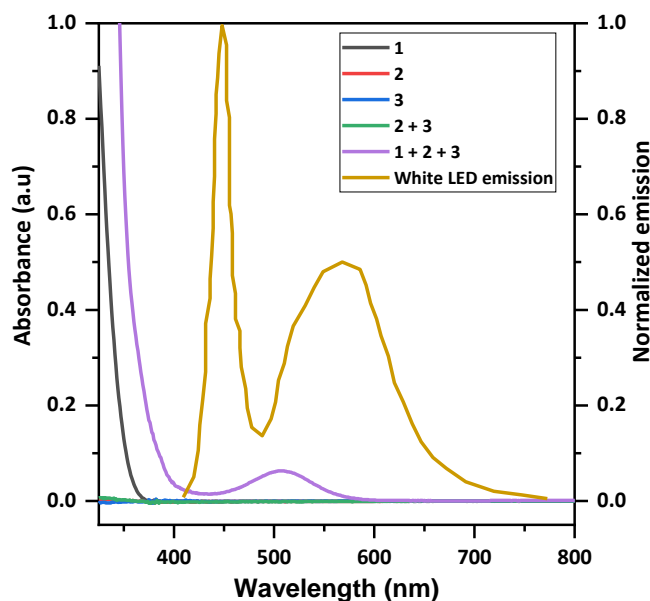

**Figure S2.** Absorption spectra of starting materials and reaction mixture in acetonitrile solvents, and normalized spectra of the used LED.

## 6. General procedure and characterization data for the synthesis of pyridopyrimidines/series 4:

**Standard procedure:** An oven-dried 15 mL glass vial equipped with a magnetic stir bar was charged sequentially with, a mixture of uracil derivatives **1** (1 mmol), aldehyde **2** (1 mmol), and cyanoacetic acid **3** (1 mmol) in CH<sub>3</sub>CN (2 mL). The reaction mixture was irradiated with constant 46  $\mu\text{mol}\cdot\text{s}^{-1}$  photon flux for 8 hours at room temperature. After the complete consumption of the starting material, (indicated by TLC), the reaction is stopped and further removed under vacuum. The obtained crude product was purified by silica gel column chromatography using an ethyl acetate/hexane mixture (1:1), and separated yields were measured.

### 5-(4-chlorophenyl)-1-methyl-2,4-dioxo-1,2,3,4,5,6,7,8-octahydropyrido[2,3-d]pyrimidine-6-carbonitrile (**4aa**)

The title compound was synthesized from the reaction of uracil derivatives **1a** (1 mmol, 1 equiv.) with 4-chlorobenzaldehyde **2a** (1 mmol, 1 equiv.) and cyanoacetic acid **3** (1 mmol, 1 equiv.) according to the general procedure **A** and was isolated by column chromatography eluting with hexane and ethyl acetate (hexane : EtOAc = 1:1) as a white solid (59 % yield).

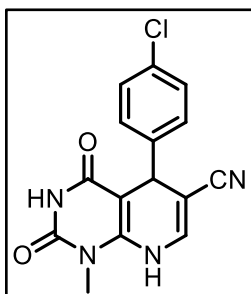

**<sup>1</sup>H-NMR** (400 MHz, DMSO-*d*<sub>6</sub>) δ: 11.04 (s, 1H), 9.82 (s, 1H), 7.38 (d, *J* = 8.4 Hz, 2H), 7.30 (d, *J* = 8.4 Hz, 2H), 7.20 (s, 1H), 4.56 (s, 1H), 3.28 (s, 3H). **<sup>13</sup>C-NMR** (101 MHz, DMSO-*d*<sub>6</sub>) δ: 161.87, 150.51, 145.56, 144.40, 137.69, 132.00, 129.85, 128.77, 119.41, 89.10, 87.28, 37.96, 29.34. Confirmed by single crystal-XRD.

#### 1-methyl-2,4-dioxo-5-phenyl-1,2,3,4,5,6,7,8-octahydropyrido[2,3-d]pyrimidine-6-carbonitrile (4ab)

The title compound was synthesized from the reaction of uracil derivatives **1a** (1 mmol, 1 equiv.) with benzaldehyde **2b** (1 mmol, 1 equiv.) and cyanoacetic acid **3** (1 mmol, 1 equiv.) according to the general procedure **A** and was isolated by column chromatography eluting with hexane and ethyl acetate (EtOAc: hexane = 1:1) as a white solid (57 % yield).

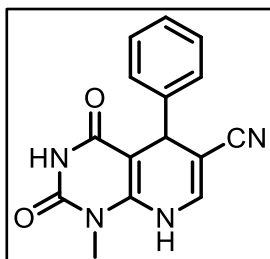

**<sup>1</sup>H-NMR** (500 MHz, DMSO-*d*<sub>6</sub>) δ: 11.00 (s, 1H), 9.78 (s, 1H), 7.33 – 7.17 (m, 5H), 4.53 (s, 1H), 3.29 (s, 3H). **<sup>13</sup>C-NMR** (101 MHz, DMSO-*d*<sub>6</sub>) δ: 161.88, 150.54, 145.50, 145.44, 137.47, 128.83, 127.90, 127.40, 119.59, 89.56, 87.59, 38.38, 29.32. HRMS(ESI): Calculated for C<sub>15</sub>H<sub>13</sub>N<sub>4</sub>O<sub>2</sub> [M+H]<sup>+</sup>: 281.1039, found: 281.1045.

#### 5-(4-fluorophenyl)-1-methyl-2,4-dioxo-1,2,3,4,5,6,7,8-octahydropyrido[2,3-d]pyrimidine-6-carbonitrile (4ac)

The title compound was synthesized from the reaction of uracil derivatives **1a** (1 mmol, 1 equiv.) with 4-fluorobenzaldehyde **2c** (1 mmol, 1 equiv.) and cyanoacetic acid **3** (1 mmol, 1 equiv.) according to the general procedure **A** and was isolated by column chromatography eluting with hexane and ethyl acetate (EtOAc: hexane = 1:1) as a white solid (55 % yield).

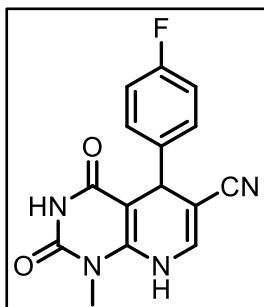

**<sup>1</sup>H-NMR** (400 MHz, DMSO-*d*<sub>6</sub>) δ: 11.02 (s, 1H), 9.80 (s, 1H), 7.32 – 7.29 (m, 2H), 7.19 (s, 1H), 7.13 (t, *J* = 8.8 Hz, 2H), 4.55 (s, 1H), 3.28 (s, 3H). **<sup>13</sup>C-NMR** (101 MHz, DMSO-*d*<sub>6</sub>) δ: 161.87, 161.16, 150.53, 150.08, 137.52, 129.85, 129.81, 119.50, 115.61, 87.55, 85.10, 37.73, 29.32. HRMS(ESI): Calculated for C<sub>15</sub>H<sub>12</sub>FN<sub>4</sub>O<sub>2</sub> [M+H]<sup>+</sup>: 299.0944, found: 299.0941.

### 1-methyl-2,4-dioxo-5-(p-tolyl)-1,2,3,4,5,6,7,8-octahydropyrido[2,3-d]pyrimidine-6-carbonitrile (**4ad**)

The title compound was synthesized from the reaction of uracil derivatives **1a** (1 mmol, 1 equiv.) with 4-methylbenzaldehyde **2d** (1 mmol, 1 equiv.) and cyanoacetic acid **3** (1 mmol, 1 equiv.) according to the general procedure **A** and was isolated by column chromatography eluting with hexane and ethyl acetate (EtOAc: hexane = 1:1) as a white solid (49 % yield).

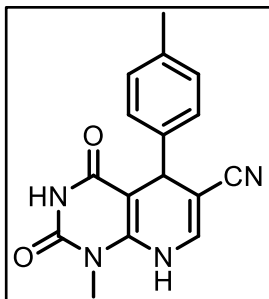

**<sup>1</sup>H-NMR** (500 MHz, DMSO-*d*<sub>6</sub>) δ: 10.98 (s, 1H), 9.75 (s, 1H), 7.16-7.10 (m, 5H), 4.47 (s, 1H), 3.28 (s, 3H), 2.26 (s, 3H). **<sup>13</sup>C-NMR** (101 MHz, DMSO-*d*<sub>6</sub>) δ: 166.13, 161.88, 150.54, 145.38, 142.64, 137.28, 136.50, 129.36, 127.81, 119.64, 89.70, 87.72, 37.99, 29.30, 25.37, 21.11.

### 1-methyl-5-(3-nitrophenyl)-2,4-dioxo-1,2,3,4,5,6,7,8-octahydropyrido[2,3-d]pyrimidine-6-carbonitrile (**4ae**)

The title compound was synthesized from the reaction of uracil derivatives **1a** (1 mmol, 1 equiv.) with 3-methylbenzaldehyde **2e** (1 mmol, 1 equiv.) and cyanoacetic acid **3** (1 mmol, 1 equiv.) according to the general procedure **A** and was isolated by column chromatography eluting with hexane and ethyl acetate (EtOAc: hexane = 1:1) as a white solid (61 % yield).

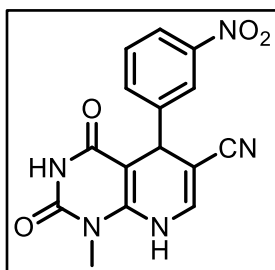

**<sup>1</sup>H-NMR** (400 MHz, DMSO-*d*<sub>6</sub>) δ: 11.08 (s, 1H), 9.92 (s, 1H), 8.12 (d, *J* = 6.7 Hz, 2H), 7.80 (d, *J* = 7.8 Hz, 1H), 7.67 – 7.62 (m, 1H), 7.29 (s, 1H), 4.80 (s, 1H), 3.29 (s, 3H). **<sup>13</sup>C-NMR** (101 MHz, DMSO-*d*<sub>6</sub>) δ: 161.90, 150.51, 148.34, 147.40, 145.78, 138.41, 135.00, 130.45, 122.58, 122.44, 119.23, 88.42, 86.96, 38.34, 29.42. HRMS(ESI): Calculated for C<sub>15</sub>H<sub>12</sub>N<sub>5</sub>O<sub>4</sub> [M+H]<sup>+</sup>: 326.0889, found: 326.0892.

### 1-methyl-5-(2-nitrophenyl)-2,4-dioxo-1,2,3,4,5,8-hexahydropyrido[2,3-d]pyrimidine-6-carbonitrile (**4af**)

The title compound was synthesized from the reaction of uracil derivatives **1a** (1 mmol, 1 equiv.) with 2-nitrobenzaldehyde **2f** (1 mmol, 1 equiv.) and cyanoacetic acid **3** (1 mmol, 1 equiv.) according to the general procedure **A** and was isolated by column chromatography eluting with hexane and ethyl acetate (EtOAc: hexane = 1:1) as a white solid (57 % yield).

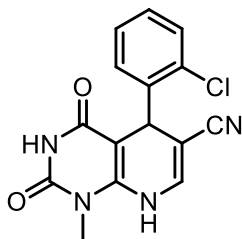

**<sup>1</sup>H-NMR** (400 MHz, DMSO-*d*<sub>6</sub>) δ: 11.00 (s, 1H), 7.40-7.39 (m, 1H), 7.38-7.37 (m, 1H), 7.32-7.29 (m, 1H), 7.25 – 7.22 (m, 1H), 7.14 (s, 1H), 5.09 (s, 1H), 3.29 (s, 3H); **<sup>13</sup>C-NMR** (101 MHz, DMSO-*d*<sub>6</sub>) δ: 161.74, 150.62, 146.28, 138.14, 132.00, 131.19, 129.59, 129.06, 128.27, 88.29, 87.35, 29.41.

**1-methyl-2,4-dioxo-5-propyl-1,2,3,4,5,6,7,8-octahydropyrido[2,3-d]pyrimidine-6-carbonitrile (4ag)**

The title compound was synthesized from the reaction of uracil derivatives **1a** (1 mmol, 1 equiv.) with butyraldehyde **2g** (1 mmol, 1 equiv.) and cyanoacetic acid **3** (1 mmol, 1 equiv.) according to the general procedure **A** and was isolated by column chromatography eluting with hexane and ethyl acetate (EtOAc: hexane = 1:1) as a white solid (29 % yield).

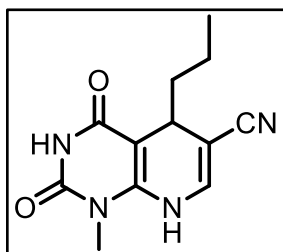

**<sup>1</sup>H-NMR** (400 MHz, DMSO-*d*<sub>6</sub>) δ: 11.03 (s, 1H), 9.00 (s, 1H), 7.16 (s, 1H), 3.94 (t, 1H), 3.22 (s, 3H), 1.64 – 1.57 (m, 2H), 1.33 – 1.22 (m, 2H), 0.86 (t, *J* = 7.1 Hz, 3H). **<sup>13</sup>C-NMR** (101 MHz, DMSO-*d*<sub>6</sub>) δ: 165.86, 162.15, 150.49, 146.07, 139.23, 120.01, 117.76, 87.87, 86.63, 37.72, 32.14, 29.20, 26.43, 17.96, 14.48. HRMS(ESI): Calculated for C<sub>12</sub>H<sub>15</sub>N<sub>4</sub>O<sub>2</sub> [M+H]<sup>+</sup>: 247.1195, found: 247.1191.

**5-isobutyl-1-methyl-2,4-dioxo-1,2,3,4,5,6,7,8-octahydropyrido[2,3-d]pyrimidine-6-carbonitrile (4ah)**

The title compound was synthesized from the reaction of uracil derivatives **1a** according to the general procedure **A** and was isolated by column chromatography eluting with hexane and ethyl acetate (EtOAc: hexane = 1:1) as a white solid (30 % yield).

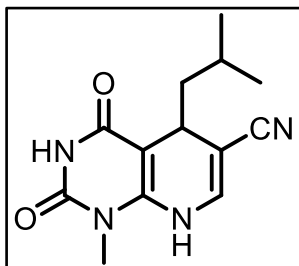

**<sup>1</sup>H-NMR** (400 MHz, DMSO-*d*<sub>6</sub>) δ: 11.01 (s, 1H), 9.68 (s, 1H), 7.12 (s, 1H), 3.47 (t, *J* = 5.0 Hz, 1H), 3.21 (s, 3H), 1.78 (tt, *J* = 13.0, 6.5 Hz, 1H), 1.46 – 1.36 (m, 1H), 1.26 – 1.19 (m, 1H), 0.90 (d, *J* = 6.7 Hz, 3H), 0.83 (d, *J* = 6.6 Hz, 3H). **<sup>13</sup>C-NMR** (101 MHz, DMSO-*d*<sub>6</sub>) δ: 166.12, 162.07, 150.48, 145.70, 139.06, 120.28, 116.29, 88.48, 87.75, 46.89, 30.02, 29.15, 25.27, 24.20, 24.05, 22.62.

### 5-(4-chlorophenyl)-1,3-dimethyl-2,4-dioxo-1,2,3,4,5,8-hexahydropyrido[2,3-d]pyrimidine-6-carbonitrile (4ba)

The title compound was synthesized from the reaction of uracil derivatives **1b** according to the general procedure **A** and was isolated by column chromatography eluting with hexane and ethyl acetate (EtOAc: hexane = 1:1) as a white solid (64 % yield).

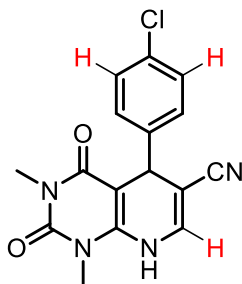

**<sup>1</sup>H-NMR** (400 MHz, DMSO-*d*<sub>6</sub>) δ: 9.15 (s, 1H), 7.55 (d, *J* = 8.4 Hz, 3H, merge two types of protons (red colour)), 7.34 (d, *J* = 6.7 Hz, 2H), 3.62 (s, 3H), 3.15 (s, 3H). **<sup>13</sup>C-NMR** (101 MHz, DMSO-*d*<sub>6</sub>) δ: 161.09, 150.90, 144.37, 139.27, 137.59, 129.92, 129.05, 128.76, 127.98, 119.35, 89.27, 86.85, 35.42, 30.37, 28.05. HRMS(ESI): Calculated for C<sub>16</sub>H<sub>14</sub>ClN<sub>4</sub>O<sub>2</sub> [M+H]<sup>+</sup>: 329.0805, found: 329.0807.

### 1,3-dimethyl-2,4-dioxo-5-phenyl-1,2,3,4,5,8-hexahydropyrido[2,3-d]pyrimidine-6-carbonitrile (4bb).

The title compound was synthesized from the reaction of uracil derivatives **1b** according to the general procedure **A** and was isolated by column chromatography eluting with hexane and ethyl acetate (EtOAc: hexane = 1:1) as a white solid (59 % yield).

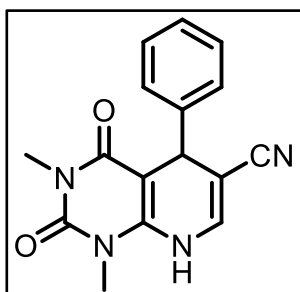

**<sup>1</sup>H-NMR** (500 MHz, DMSO-*d*<sub>6</sub>) δ: 9.88 (s, 1H), 7.32 – 7.25 (m, 5H), 7.16 (s, 1H), 4.55 (s, 1H), 3.35 (s, 3H), 3.05 (s, 3H). **<sup>13</sup>C-NMR** (101 MHz, DMSO-*d*<sub>6</sub>) δ: 150.95, 148.39, 143.02, 135.14, 134.25, 130.51, 122.68, 122.60, 121.91, 88.66, 86.60, 35.84, 30.51, 28.15.

### 1,3-dimethyl-2,4-dioxo-5-propyl-1,2,3,4,5,8-hexahydropyrido[2,3-d]pyrimidine-6-carbonitrile (4bc)

The title compound was synthesized from the reaction of uracil derivatives **1b** according to the general procedure **A** and was isolated by column chromatography eluting with hexane and ethyl acetate (EtOAc: hexane = 1:1) as a white solid (31 % yield).

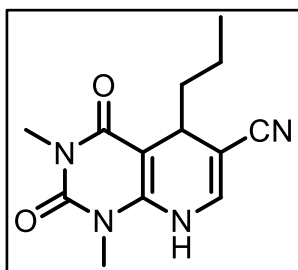

**<sup>1</sup>H-NMR** (400 MHz, DMSO-*d*<sub>6</sub>) δ: 9.59 (s, 1H), 7.16 (s, 1H), 3.58 – 3.55 (m, 1H), 3.29 (s, 3H), 3.14 (s, 3H), 1.65 – 1.58 (m, 2H), 1.38 – 1.25 (m, 2H), 0.86 (t, *J* = 7.2 Hz, 3H). **<sup>13</sup>C-NMR** (101 MHz, DMSO-*d*<sub>6</sub>) δ: 161.41, 150.91, 144.83, 139.14, 120.00, 88.10, 86.21, 37.70, 32.61, 30.26, 28.23, 18.01, 14.52. HRMS(ESI): Calculated for C<sub>13</sub>H<sub>17</sub>N<sub>4</sub>O<sub>2</sub> [M+H]<sup>+</sup>: 261.1352, found: 261.1355.

**5-(4-chlorophenyl)-1-ethyl-2,4-dioxo-1,2,3,4,5,8-hexahydropyrido[2,3-d]pyrimidine-6-carbonitrile (4ca)**

The title compound was synthesized from the reaction of uracil derivatives **1c** according to the general procedure **A** and was isolated by column chromatography eluting with hexane and ethyl acetate (EtOAc: hexane = 1:1) as a white solid (57 % yield).

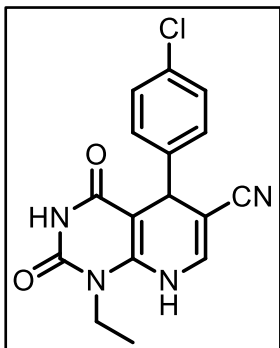

**<sup>1</sup>H-NMR** (400 MHz, DMSO-*d*<sub>6</sub>)  $\delta$ : 9.14 (s, 1H), 7.54 (d, *J* = 8.5 Hz, 3H), 7.36 (d, *J* = 8.5 Hz, 2H), 4.55 (s, 1H), 4.25 (q, *J* = 7.0 Hz, 2H), 1.22 (t, *J* = 7.0 Hz, 3H). **<sup>13</sup>C-NMR** (101 MHz, DMSO-*d*<sub>6</sub>)  $\delta$ : 159.88, 156.47, 155.26, 150.21, 134.09, 130.11, 129.60, 128.51, 116.34, 109.86, 106.09, 37.70, 13.33.

**1-ethyl-2,4-dioxo-5-phenyl-1,2,3,4,5,8-hexahydropyrido[2,3-d]pyrimidine-6-carbonitrile (4cb)**

The title compound was synthesized from the reaction of uracil derivatives **1c** according to the general procedure **A** and was isolated by column chromatography eluting with hexane and ethyl acetate (EtOAc: hexane = 1:1) as a white solid (58 % yield).

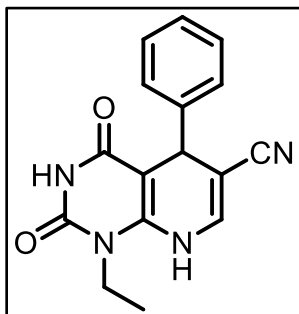

**<sup>1</sup>H-NMR** (400 MHz, DMSO-*d*<sub>6</sub>)  $\delta$ : 11.03 (s, 1H), 9.78 (s, 1H), 7.32 (t, *J* = 7.4 Hz, 2H), 7.26 – 7.17 (m, 4H), 4.52 (s, 1H), 3.87 (q, *J* = 9.6 Hz, 2H), 1.14 (t, *J* = 6.9 Hz, 3H). **<sup>13</sup>C-NMR** (101 MHz, DMSO-*d*<sub>6</sub>)  $\delta$ : 161.88, 150.21, 145.41, 144.57, 137.49, 128.88, 127.84, 127.42, 119.54, 89.44, 87.87, 38.35, 37.18, 14.08. HRMS(ESI): Calculated for C<sub>16</sub>H<sub>15</sub>N<sub>4</sub>O<sub>2</sub> [M+H]<sup>+</sup>: 295.1195, found: 295.1194.

**1-ethyl-5-(4-methoxyphenyl)-2,4-dioxo-1,2,3,4,5,8-hexahydropyrido[2,3-d]pyrimidine-6-carbonitrile (4cc)**

The title compound was synthesized from the reaction of uracil derivatives **1c** according to the general procedure **A** and was isolated by column chromatography eluting with hexane and ethyl acetate (EtOAc: hexane = 1:1) as a white solid (51 % yield).

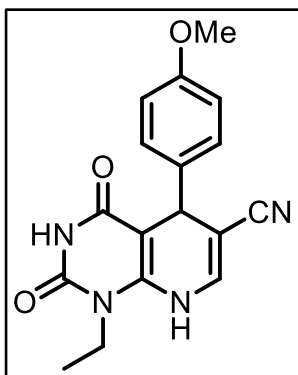

**<sup>1</sup>H-NMR** (400 MHz, DMSO-*d*<sub>6</sub>) δ: 11.00 (s, 1H), 9.74 (s, 1H), 7.16 (d, *J* = 1.4 Hz, 2H), 7.14 (s, 1H), 6.87 (d, *J* = 8.7 Hz, 2H), 4.46 (s, 1H), 3.87 (dd, *J* = 11.6, 7.1 Hz, 2H), 3.72 (s, 3H), 1.13 (t, *J* = 7.0 Hz, 3H). **<sup>13</sup>C-NMR** (101 MHz, DMSO-*d*<sub>6</sub>) δ: 161.99, 160.20, 159.86, 158.75, 144.39, 130.02, 128.99, 128.07, 119.70, 89.73, 88.25, 55.55, 37.52, 37.23, 14.08. HRMS(ESI): Calculated for C<sub>17</sub>H<sub>17</sub>N<sub>4</sub>O<sub>3</sub> [M+H]<sup>+</sup>: 325.1301, found: 325.1306.

#### 1-ethyl-2,4-dioxo-5-(p-tolyl)-1,2,3,4,5,8-hexahydropyrido[2,3-d]pyrimidine-6-carbonitrile (4cd)

The title compound was synthesized from the reaction of uracil derivatives **1c** according to the general procedure **A** and was isolated by column chromatography eluting with hexane and ethyl acetate (EtOAc: hexane = 1:1) as a white solid (54 % yield).

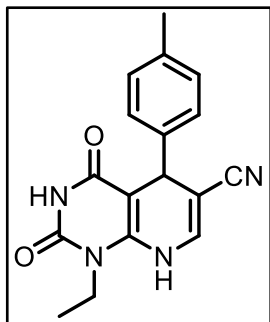

**<sup>1</sup>H-NMR** (400 MHz, DMSO-*d*<sub>6</sub>) δ: 11.01 (s, 1H), 9.77 (s, 1H), 7.28 – 7.12 (m, 5H), 4.47 (s, 1H), 3.86 (q, *J* = 7.5 Hz, 2H), 2.26 (s, 3H), 1.13 (t, *J* = 6.9 Hz, 3H). **<sup>13</sup>C-NMR** (101 MHz, DMSO-*d*<sub>6</sub>) δ: 161.87, 150.21, 144.43, 142.58, 137.30, 129.42, 128.87, 127.75, 119.59, 89.58, 88.03, 37.95, 37.15, 21.10, 14.07. HRMS(ESI): Calculated for C<sub>17</sub>H<sub>17</sub>N<sub>4</sub>O<sub>2</sub> [M+H]<sup>+</sup>: 309.1352, found: 309.1355.

#### 1-ethyl-5-isobutyl-2,4-dioxo-1,2,3,4,5,8-hexahydropyrido[2,3-d]pyrimidine-6-carbonitrile (4ce)

The title compound was synthesized from the reaction of uracil derivatives **1c** according to the general procedure **A** and was isolated by column chromatography eluting with hexane and ethyl acetate (EtOAc: hexane = 1:1) as a white solid (28 % yield).

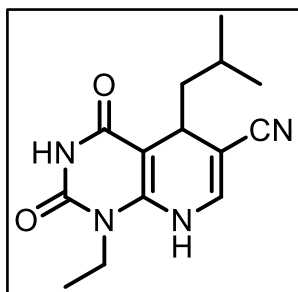

**<sup>1</sup>H-NMR** (400 MHz, DMSO-*d*<sub>6</sub>) δ: 11.03 (s, 1H), 9.00 (s, 1H), 7.12 (s, 1H), 3.82 (q, *J* = 7.0 Hz, 2H), 3.49 (dd, *J* = 7.7 Hz, 1H), 1.23-1.17 (m, 6H), 1.06 (t, *J* = 7.0 Hz, 2H), 0.97-0.89 (m, 2H), 0.85 (d, *J* = 6.5 Hz, 2H). **<sup>13</sup>C-NMR** (101 MHz, DMSO-*d*<sub>6</sub>) δ: 162.06, 150.18, 144.90, 139.24, 120.30, 88.23, 87.99, 46.70, 36.97, 30.02, 24.02, 22.62, 14.04.

**5-(4-chlorophenyl)-2,4-dioxo-1-phenyl-1,2,3,4,5,8-hexahydropyrido[2,3-d]pyrimidine-6-carbonitrile (4da)**

The title compound was synthesized from the reaction of uracil derivatives **1d** according to the general procedure **A** and was isolated by column chromatography eluting with hexane and ethyl acetate (EtOAc: hexane = 1:1) as a white solid (57 % yield).

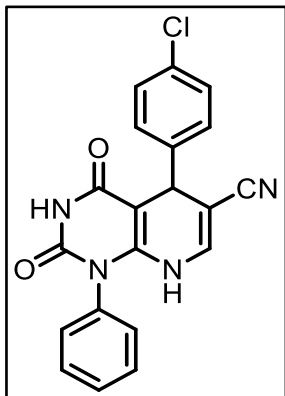

**<sup>1</sup>H-NMR** (400 MHz, DMSO-*d*<sub>6</sub>) δ: 11.20 (s, 1H), 8.52 (s, 1H), 7.55 (m, 5H), 7.42-7.36 (m, 4H), 6.89 (d, *J* = 5.3 Hz, 1H), 4.62 (s, 1H). **<sup>13</sup>C-NMR** (101 MHz, DMSO-*d*<sub>6</sub>) δ: 162.32, 150.25, 144.94, 144.24, 137.72, 133.60, 132.06, 130.41, 129.98, 128.83, 119.39, 88.77, 87.21, 38.20. HRMS(ESI): Calculated for C<sub>20</sub>H<sub>14</sub>ClN<sub>4</sub>O<sub>2</sub> [M+H]<sup>+</sup>: 377.0805, found: 377.0807.

**5-(4-fluorophenyl)-2,4-dioxo-1-phenyl-1,2,3,4,5,8-hexahydropyrido[2,3-d]pyrimidine-6-carbonitrile (4db)**

The title compound was synthesized from the reaction of uracil derivatives **1d** according to the general procedure **A** and was isolated by column chromatography eluting with hexane and ethyl acetate (EtOAc: hexane = 1:1) as a white solid (58 % yield).

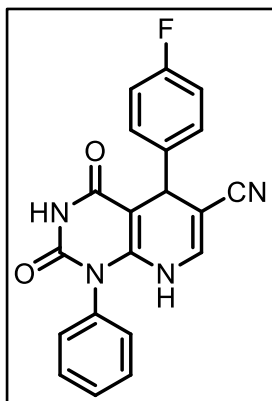

**<sup>1</sup>H-NMR** (400 MHz, DMSO-*d*<sub>6</sub>) δ: 11.18 (s, 1H), 8.50 (s, 1H), 7.58 – 7.42 (m, 5H), 7.39 – 7.35 (m, 2H), 7.16 (t, *J* = 8.8 Hz, 2H), 6.87 (s, 1H), 4.62 (s, 1H). **<sup>13</sup>C-NMR** (101 MHz, DMSO-*d*<sub>6</sub>) δ: 162.41, 150.31, 144.93, 142.36, 137.57, 133.61, 130.46, 130.28, 130.06, 129.99, 119.52, 115.71, 115.54, 89.14, 87.51, 38.01.

**5-(4-methoxyphenyl)-2,4-dioxo-1-phenyl-1,2,3,4,5,8-hexahydropyrido[2,3-d]pyrimidine-6-carbonitrile (4dc)**

The title compound was synthesized from the reaction of uracil derivatives **1d** according to the general procedure **A** and was isolated by column chromatography eluting with hexane and ethyl acetate (EtOAc: hexane = 1:1) as a white solid (48 % yield).

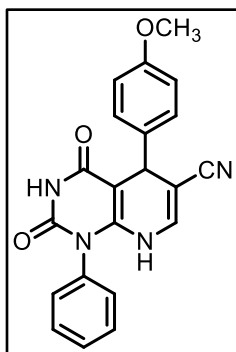

**<sup>1</sup>H-NMR** (400 MHz, DMSO-*d*<sub>6</sub>) δ: 11.21 (s, 1H), 8.53 (s, 1H), 7.57-7.34 (m, 9H), 6.88 (s, 1H), 4.58 (s, 1H), 3.80 (s, 3H). **<sup>13</sup>C-NMR** (101 MHz, DMSO-*d*<sub>6</sub>) δ: 162.35, 150.28, 145.30, 144.89, 137.48, 133.61, 130.44, 128.91, 128.01, 127.48, 119.58, 116.39, 89.24, 87.48, 38.63. HRMS(ESI): Calculated for C<sub>21</sub>H<sub>17</sub>N<sub>4</sub>O<sub>3</sub> [M+H]<sup>+</sup>: 373.1301, found: 373.1303.

## 7. General procedure and characterization data of series 5

A mixture of Uracil derivatives **1** (1 mmol), Aldehydes **2** (1 mmol), and Cyanoacetic acid **3** (2 mmol) were mixed in a minimum amount of CH<sub>3</sub>CN to get a paste-like mixture with constant stirring at room temperature under dark conditions for 10 hours. After completion of the reaction (monitored by TLC), the excess solvent was removed under vacuum, and the obtained product was purified by column chromatography.

**N'-(5-((6-amino-1-methyl-2,4-dioxo-1,2,3,4-tetrahydropyrimidin-5-yl)(4-chlorophenyl)methyl)-3-methyl-2,6-dioxo-1,2,3,6-tetrahydropyrimidin-4-yl)-N,N-dimethylformimidamide (5aa).**

**Standard procedure B:** The reaction was performed according to the general procedure employing amide (**1a**, 1 mmol, 1.00 equiv.), 4-chlorobenzaldehyde (**2a**, 1 mmol, 1.00 equiv.) and cyanoacetic acid (**3**, 2.00 mmol, 2.00 equiv.). The obtained crude product was purified by silica gel column chromatography (9.5:0.5) (Ethyl acetate: hexane) afforded **5aa** (65%) as a white solid.

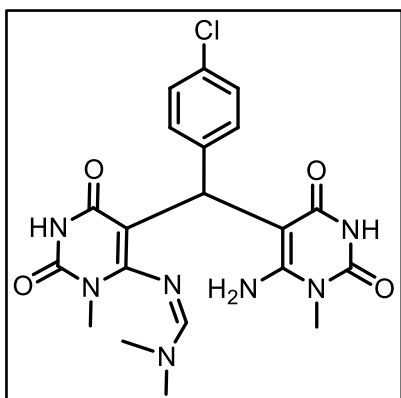

**<sup>1</sup>H-NMR** (400 MHz, DMSO-*d*<sub>6</sub>) δ: 11.08 (s, 1H), 10.51 (s, 1H), 7.26 (br, 3H, merge), 7.19 (d, *J* = 8.5 Hz, 2H), 6.96 (d, *J* = 8.3 Hz, 2H), 5.41 (s, 1H), 3.24 (s, 3H), 3.15 (s, 3H), 2.88 (s, 6H). **<sup>13</sup>C-NMR** (126 MHz, DMSO-*d*<sub>6</sub>) δ: 166.16, 165.89, 162.92, 155.57, 154.39, 150.85, 150.64, 142.22, 137.55, 135.14, 130.34, 130.14, 129.81, 129.73, 129.23, 128.99, 128.26, 128.10, 99.97, 87.37, 65.45, 35.89, 33.78, 25.30. HRMS(ESI): Calculated for C<sub>20</sub>H<sub>23</sub>ClN<sub>7</sub>O<sub>4</sub> [M+H]<sup>+</sup>: 460.1500, found: 460.1527.

**N'-(5-((6-amino-1-methyl-2,4-dioxo-1,2,3,4-tetrahydropyrimidin-5-yl)(phenyl)methyl)-3-methyl-2,6-dioxo-1,2,3,6-tetrahydropyrimidin-4-yl)-N,N-dimethylformimidamide (5ab).**

The reaction was performed according to the general procedure employing amide (**1a**, 1 mmol, 1.00 equiv.), benzaldehyde (**2b**, 1 mmol, 1.00 equiv.), and cyanoacetic acid (**3**, 2.00 mmol, 2.00 equiv.). The obtained crude product was purified by silica gel column chromatography (9.5:0.5) (Ethyl acetate: hexane) afforded **5ab** (67 %) as a white solid.

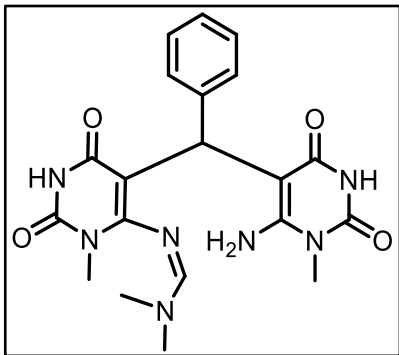

**<sup>1</sup>H-NMR** (400 MHz, DMSO-*d*<sub>6</sub>) δ: 11.02 (s, 1H), 10.47 (s, 1H), 7.25 (s, 3H, merge), 7.15 (t, *J* = 7.6 Hz, 2H), 7.04 (t, *J* = 7.7 Hz, 1H), 6.95 (d, *J* = 8.2 Hz, 2H), 5.46 (s, 1H), 3.25 (s, 3H), 3.16 (s, 3H), 2.87 (s, 3H), 2.87 (s, 3H). **<sup>13</sup>C-NMR** (101 MHz, DMSO-*d*<sub>6</sub>) δ: 163.66, 162.52, 161.30, 156.31, 153.46, 152.39, 151.01, 145.18, 126.79, 124.63, 123.70, 86.11, 82.79, 40.82, 34.92, 29.32, 29.16.

**N'-(5-((6-amino-1-methyl-2,4-dioxo-1,2,3,4-tetrahydropyrimidin-5-yl)(4-methoxyphenyl)methyl)-3-methyl-2,6-dioxo-1,2,3,6-tetrahydropyrimidin-4-yl)-N,N-dimethylformimidamide (5ac).**

The reaction was performed according to the general procedure employing amide (**1a**, 1 mmol, 1.00 equiv.), 4-methoxybenzaldehyde (**2d**, 1 mmol, 1.00 equiv.), and cyanoacetic acid (**3**, 2.00 mmol, 2.00 equiv.). The obtained crude product was purified by silica gel column chromatography (9.5:0.5) (Ethyl acetate: hexane) afforded **5ac** (61 %) as a white solid.

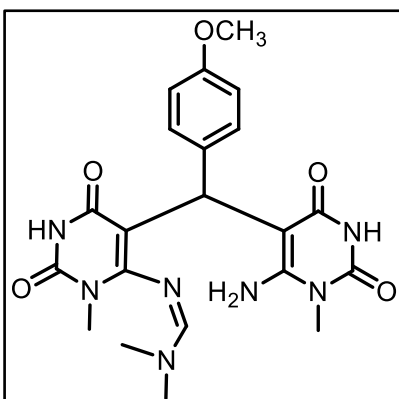

**<sup>1</sup>H-NMR** (400 MHz, DMSO-*d*<sub>6</sub>) δ: 11.50 (s, 1H), 11.28 (s, 1H), 7.32 (br, 3H, merge), 6.92 (d, *J* = 9.5 Hz, 2H), 6.74 (d, *J* = 9.1 Hz, 2H), 5.30 (s, 1H), 3.69 (s, 3H), 3.15 (s, 3H), 3.05 (m, 3H), 2.89 (m, 3H), 2.78 (s, 3H). **<sup>13</sup>C-NMR** (101 MHz, DMSO-*d*<sub>6</sub>) δ: 165.81, 163.96, 162.04, 159.95, 157.71, 155.11, 146.22, 133.91, 128.91, 127.60, 113.99, 108.68, 81.38, 55.50, 34.22, 34.13, 31.27, 30.64. HRMS(ESI): Calculated for C<sub>21</sub>H<sub>26</sub>N<sub>7</sub>O<sub>5</sub> [M+H]<sup>+</sup>: 456.1995, found: 456.1992.

**N'-(5-((6-amino-1-methyl-2,4-dioxo-1,2,3,4-tetrahydropyrimidin-5-yl)(2-chlorophenyl)methyl)-3-methyl-2,6-dioxo-1,2,3,6-tetrahydropyrimidin-4-yl)-N,N-dimethylformimidamide (5ad).**

The reaction was performed according to the general procedure employing amide (**1a**, 1 mmol, 1.00 equiv.), 2-chlorobenzaldehyde (**2f**, 1 mmol, 1.00 equiv.), and cyanoacetic acid (**3**, 2.00 mmol, 2.00 equiv.). The obtained crude product was purified by silica gel column chromatography (9.5:0.5) (Ethyl acetate: hexane) afforded **5ad** (60 %) as a white solid.

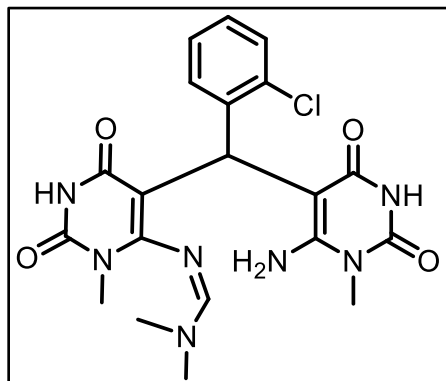

**<sup>1</sup>H-NMR** (400 MHz, DMSO-*d*<sub>6</sub>) δ: 10.94 (s, 1H), 10.51 (s, 1H), 7.23 – 7.09 (m, 7H, merge), 5.37 (s, 1H), 3.27 (s, 3H), 3.13 (s, 3H), 2.87 (s, 3H), 2.85 (s, 3H). **<sup>13</sup>C-NMR** (101 MHz, DMSO-*d*<sub>6</sub>) δ: 165.58, 163.22, 162.28, 155.40, 155.04, 151.07, 150.88, 142.28, 129.69, 129.64, 128.90, 128.00, 99.63, 87.89, 36.07, 34.11, 30.37, 29.15, 28.27.

**N'-(5-((6-amino-1-methyl-2,4-dioxo-1,2,3,4-tetrahydropyrimidin-5-yl)(thiophen-2-yl)methyl)-3-methyl-2,6-dioxo-1,2,3,6-tetrahydropyrimidin-4-yl)-N,N-dimethylformimidamide (5ae).**

The reaction was performed according to the general procedure employing amide (**1a**, 1 mmol, 1.00 equiv.), thiophene-2-carbaldehyde (**2g**, 1 mmol, 1.00 equiv.), and cyanoacetic acid (**3**, 2.00 mmol, 2.00 equiv.). The obtained crude product was purified by silica gel column chromatography (9.5:0.5) (Ethyl acetate: hexane) afforded **5ae** (55 %) as a white solid.

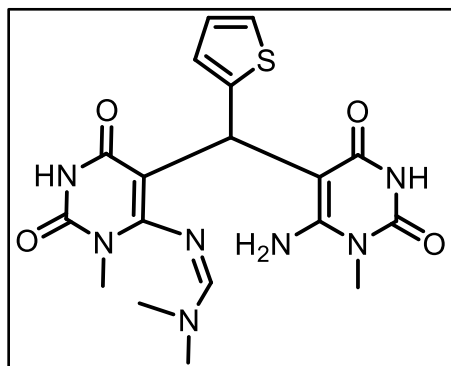

**<sup>1</sup>H-NMR** (400 MHz, DMSO-*d*<sub>6</sub>) δ: 11.41 (s, 1H), 11.04 (s, 1H), 7.52 (s, 1H), 7.41 (s, 2H), 7.25 (d, *J* = 4.9 Hz, 1H), 6.86 – 6.83 (m, 1H), 6.71 (d, *J* = 3.3 Hz, 1H), 5.54 (s, 1H), 3.15 (s, 3H), 3.09 (s, 3H), 2.93 (s, 3H), 2.86 (s, 3H).

**N'-(5-((6-amino-1,3-dimethyl-2,4-dioxo-1,2,3,4-tetrahydropyrimidin-5-yl)(4-chlorophenyl)methyl)-1,3-dimethyl-2,6-dioxo-1,2,3,6-tetrahydropyrimidin-4-yl)-N,N-dimethylformimidamide (5ba).**

The reaction was performed according to the general procedure employing amide (**1b**, 1 mmol, 1.00 equiv.), 4-chlorobenzaldehyde (**2a**, 1 mmol, 1.00 equiv.), and cyanoacetic acid (**3**, 2.00 mmol, 2.00 equiv.). Purification of the resulting reaction mixture by silica gel column chromatography (7:3) (EtOAc: hexane) afforded **5ba** (68 %) as a solid white precipitate.

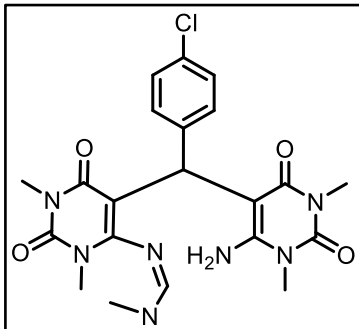

**<sup>1</sup>H-NMR** (500 MHz, DMSO-*d*<sub>6</sub>) δ: 7.44 (s, 1H), 7.23 – 7.21 (m, 4H), 7.07 (d, *J* = 8.4 Hz, 2H), 5.43 (s, 1H), 3.23 (s, 3H), 3.22 (s, 3H), 3.21 (s, 3H), 3.14 (s, 3H), 2.90 (s, 3H), 2.76 (s, 3H).

**N'-((5-((6-amino-1,3-dimethyl-2,4-dioxo-1,2,3,4-tetrahydropyrimidin-5-yl)(phenyl)methyl)-1,3-dimethyl-2,6-dioxo-1,2,3,6-tetrahydropyrimidin-4-yl)-N,N-dimethylformimidamide (5bb).**

The reaction was performed according to the general procedure employing amide (**1b**, 1 mmol, 1.00 equiv.), benzaldehyde (**2b**, 1 mmol, 1.00 equiv.), and cyanoacetic acid (**3**, 2.00 mmol, 2.00 equiv.). Purification of the resulting reaction mixture by silica gel column chromatography (7:3) (EtOAc: hexane) afforded **5bb** (70 %) as a white solid.

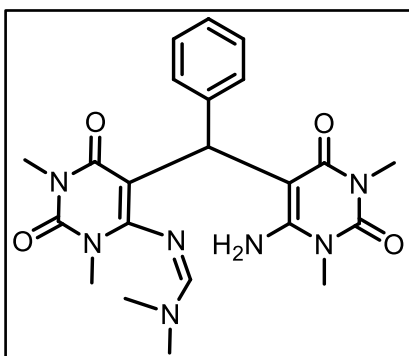

**<sup>1</sup>H-NMR** (500 MHz, DMSO-*d*<sub>6</sub>) δ: 7.25 (s, 1H), 7.21-7.18 (m, 3H), 7.14 – 7.04 (m, 4H), 5.45 (s, 1H), 3.24 (s, 3H), 3.23 (s, 3H), 3.21 (s, 3H), 3.13 (s, 3H), 2.91 (s, 3H), 2.69 (s, 3H).

**N'-((5-((6-amino-1,3-dimethyl-2,4-dioxo-1,2,3,4-tetrahydropyrimidin-5-yl)(4-fluorophenyl)methyl)-1,3-dimethyl-2,6-dioxo-1,2,3,6-tetrahydropyrimidin-4-yl)-N,N-dimethylformimidamide (5bc)**

The reaction was performed according to the general procedure employing amide (**1a**, 1 mmol, 1.00 equiv.), 4-fluorobenzaldehyde (**2e**, 1 mmol, 1.00 equiv.), and cyanoacetic acid (**3**, 2.00 mmol, 2.00 equiv.). Purification by silica gel column chromatography (7:3) (EtOAc: hexane) afforded **5bc** (66 %) as a white solid.

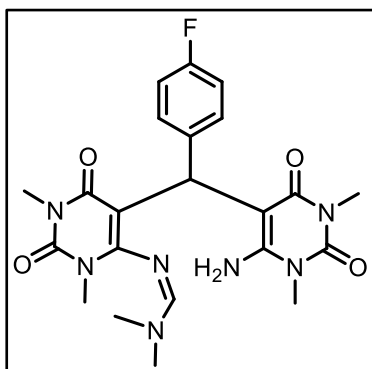

**<sup>1</sup>H-NMR** (500 MHz, DMSO-*d*<sub>6</sub>) δ: 7.41 (s, 1H), 7.20 (s, 1H), 7.09 – 7.06 (m, 2H), 6.99 (t, *J* = 8.8 Hz, 2H), 5.42 (s, 1H), 3.23 (s, 3H), 3.22 (s, 3H), 3.21 (s, 3H), 3.13 (s, 3H), 2.91 (s, 3H), 2.74 (s, 3H).

**N'-(5-((6-amino-1,3-dimethyl-2,4-dioxo-1,2,3,4-tetrahydropyrimidin-5-yl)(4-methoxyphenyl)methyl)-1,3-dimethyl-2,6-dioxo-1,2,3,6-tetrahydropyrimidin-4-yl)-N,N-dimethylformimidamide (5bd)**

The reaction was performed according to the general procedure employing amide (**1a**, 1 mmol, 1.00 equiv.), 4-methoxybenzaldehyde (**2d**, 1 mmol, 1.00 equiv.), and cyanoacetic acid (**3**, 2.00 mmol, 2.00 equiv.). Purification by silica gel column chromatography (7:3) (EtOAc: hexane) afforded **5bd** (61 %) as a white solid.

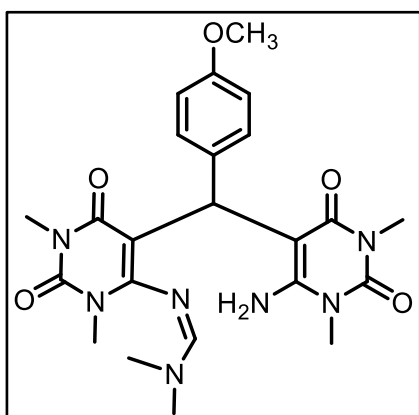

**<sup>1</sup>H-NMR** (500 MHz, DMSO-*d*<sub>6</sub>) δ: 7.35 (s, 1H), 7.20 (s, 1H), 6.96 (d, *J* = 8.5 Hz, 2H), 6.75 (d, *J* = 8.7 Hz, 2H), 5.38 (s, 1H), 3.69 (s, 3H), 3.24 (s, 3H), 3.22 (s, 3H), 3.21 (s, 3H), 3.13 (s, 3H), 2.92 (s, 3H), 2.73 (s, 3H).

**N'-(5-((6-amino-1,3-dimethyl-2,4-dioxo-1,2,3,4-tetrahydropyrimidin-5-yl)(thiophen-3-yl)methyl)-1,3-dimethyl-2,6-dioxo-1,2,3,6-tetrahydropyrimidin-4-yl)-N,N-dimethylformimidamide (5be)**

The reaction was performed according to the general procedure employing amide (**1a**, 1 mmol, 1.00 equiv.), aldehyde (**2a**, 1 mmol, 1.00 equiv.), and cyanoacetic acid (**3**, 2.00 mmol, 2.00 equiv.). Purification by silica gel column chromatography (7:3) (EtOAc: hexane) afforded **5be** (65 %) as a solid white precipitate.

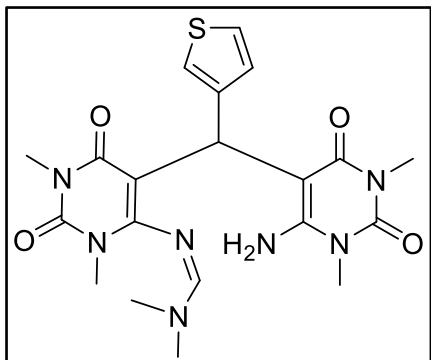

**<sup>1</sup>H-NMR** (400 MHz, DMSO-*d*<sub>6</sub>) δ: 7.46 (s, 1H), 7.35 (dd, *J* = 4.9, 2.9 Hz, 1H), 7.30 (s, 1H), 7.09 – 7.03 (m, 1H), 6.74 (d, *J* = 4.9 Hz, 1H), 5.36 (d, *J* = 0.7 Hz, 1H), 3.24 (s, 3H), 3.22 (s, 3H), 3.20 (s, 3H), 3.15 (s, 3H), 2.94 (s, 3H), 2.79 (s, 3H).

**N'-(5-((6-amino-1-ethyl-3-methyl-2,4-dioxo-1,2,3,4-tetrahydropyrimidin-5-yl)(4-chlorophenyl)methyl)-3-ethyl-1-methyl-2,6-dioxo-1,2,3,6-tetrahydropyrimidin-4-yl)-N,N-dimethylformimidamide (5ca).**

The reaction was performed according to the general procedure employing amide (**1c**, 1 mmol, 1.00 equiv.), aldehyde (**2a**, 1 mmol, 1.00 equiv.), and cyanoacetic acid (**3**, 2.00 mmol, 2.00 equiv.). Purification by silica gel column chromatography (9:1) (EtOAc: hexane) afforded **5ca** (59 %) as a solid white precipitate.

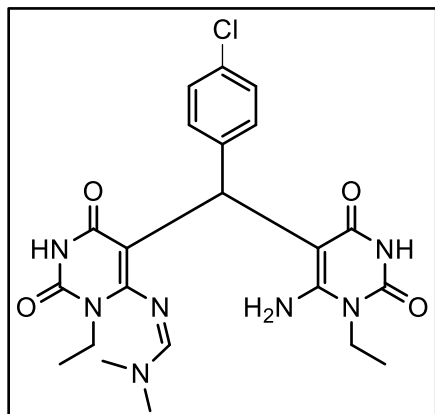

**<sup>1</sup>H-NMR** (400 MHz, DMSO-*d*<sub>6</sub>) δ: 11.05 (s, 1H), 10.49 (s, 1H), 7.30 (s, 2H), 7.26 (s, 1H), 7.20 (d, *J* = 8.6 Hz, 2H), 6.93 (d, *J* = 8.5 Hz, 2H), 5.42 (s, 1H), 3.92 – 3.87 (m, 2H), 3.79 – 3.74 (m, 2H), 2.89 (s, 3H), 2.88 (s, 3H), 1.14 (t, *J* = 7.0 Hz, 3H), 1.08 (t, *J* = 7.0 Hz, 3H).

**N'-(5-((6-amino-1-ethyl-3-methyl-2,4-dioxo-1,2,3,4-tetrahydropyrimidin-5-yl)(phenyl)methyl)-3-ethyl-1-methyl-2,6-dioxo-1,2,3,6-tetrahydropyrimidin-4-yl)-N,N-dimethylformimidamide (5cb).**

The reaction was performed according to the general procedure employing amide (**1c**, 1 mmol, 1.00 equiv.), aldehyde (**2b**, 1 mmol, 1.00 equiv.), and cyanoacetic acid (**3**, 2.00 mmol, 2.00 equiv.). Purification by silica gel column chromatography (9:1) (EtOAc: hexane) afforded **5cb** (61 %) as a solid white precipitate.

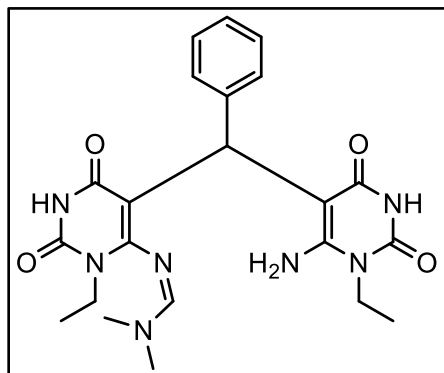

**<sup>1</sup>H-NMR** (500 MHz, DMSO-*d*<sub>6</sub>) δ: 11.03 (s, 1H), 10.48 (s, 1H), 7.33 (s, 2H), 7.26 (s, 1H), 7.16 (t, *J* = 7.7 Hz, 2H), 7.04 (t, *J* = 7.3 Hz, 1H), 6.92 (d, *J* = 8.2 Hz, 2H), 5.45 (s, 1H), 3.94-3.87 (m, 2H), 3.78-3.74 (m, 2H), 2.88 (s, 3H), 2.87 (s, 3H), 1.14 (t, *J* = 7.0 Hz, 3H), 1.08 (t, *J* = 7.0 Hz, 3H).

**N'-(5-((6-amino-1-ethyl-3-methyl-2,4-dioxo-1,2,3,4-tetrahydropyrimidin-5-yl)(4-fluorophenyl)methyl)-3-ethyl-1-methyl-2,6-dioxo-1,2,3,6-tetrahydropyrimidin-4-yl)-N,N-dimethylformimidamide (5cc)**

The reaction was performed according to the general procedure employing amide (**1c**, 1 mmol, 1.00 equiv.), aldehyde (**2c**, 1 mmol, 1.00 equiv.), and cyanoacetic acid (**3**, 2.00 mmol, 2.00 equiv.). Purification by silica gel column chromatography (9:1) (EtOAc: hexane) afforded **5cc** (62 %) as a solid white precipitate.

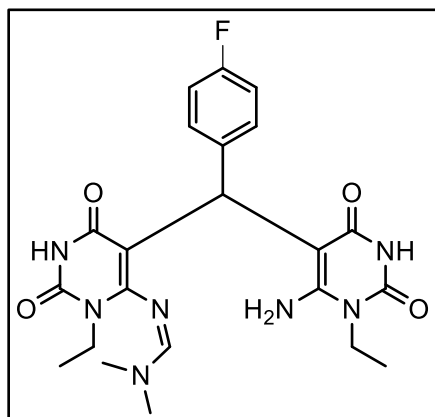

**<sup>1</sup>H-NMR** (400 MHz, DMSO-*d*<sub>6</sub>) δ: 11.02 (s, 1H), 10.47 (s, 1H), 7.30 (s, 2H), 7.26 (s, 1H), 6.94 (m, 4H), 5.41 (s, 1H), 3.93 – 3.87 (m, 2H), 3.78 – 3.74 (m, 2H), 2.89 (s, 3H), 2.88 (s, 3H), 1.14 (t, *J* = 7.0 Hz, 3H), 1.08 (t, *J* = 7.0 Hz, 3H). **<sup>13</sup>C-NMR** (101 MHz, DMSO-*d*<sub>6</sub>) δ: 165.69, 163.08, 162.38, 161.53, 159.62, 155.51, 154.26, 150.70, 139.00, 128.61, 128.55, 114.88, 114.71, 99.93, 88.31, 38.16, 36.95, 36.02, 34.14, 14.15, 13.75.

**N'-(5-((6-amino-2,4-dioxo-1-phenyl-1,2,3,4-tetrahydropyrimidin-5-yl)(4-chlorophenyl)methyl)-2,6-dioxo-3-phenyl-1,2,3,6-tetrahydropyrimidin-4-yl)-N,N-dimethylformimidamide (5da)**

The reaction was performed according to the general procedure employing amide (**1d**, 1 mmol, 1.00 equiv.), aldehyde (**2a**, 1 mmol, 1.00 equiv.), and cyanoacetic acid (**3**, 2.00 mmol, 2.00 equiv.). Purification by silica gel column chromatography (9:1) (EtOAc: hexane) afforded **5da** (58 %) as a solid white precipitate.

**<sup>1</sup>H-NMR** (400 MHz, DMSO-*d*<sub>6</sub>) δ: 10.92 (br, 2H), 7.57-7.50 (m, 6H), 7.43 (br, 4H), 7.31-7.27 (m, 4H), 6.68 (br, 2H), 5.49 (s, 1H), 3.85 (s, 3H) **<sup>13</sup>C-NMR** (101 MHz, DMSO-*d*<sub>6</sub>) δ: 165.67, 163.90, 163.18, 162.38, 155.51, 154.27, 150.72, 150.69, 142.24, 134.03, 133.40, 132.84, 131.66, 131.28, 130.83, 130.22, 129.74, 129.49, 128.84, 128.13, 99.71, 87.94, 36.96, 35.18, 34.15.

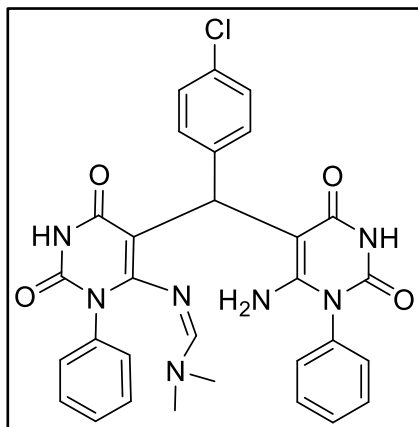

**N'-(5-((6-amino-2,4-dioxo-1-phenyl-1,2,3,4-tetrahydropyrimidin-5-yl)(phenyl)methyl)-2,6-dioxo-3-phenyl-1,2,3,6-tetrahydropyrimidin-4-yl)-N,N-dimethylformimidamide (5db).**

The reaction was performed according to the general procedure employing amide (**1d**, 1 mmol, 1.00 equiv.), aldehyde (**2b**, 1 mmol, 1.00 equiv.), and cyanoacetic acid (**3**, 2.00 mmol, 2.00 equiv.). Purification by silica gel column chromatography (9:1) (EtOAc: hexane) afforded **5da** (58 %) as a solid white precipitate.

<sup>1</sup>H-NMR (400 MHz, DMSO-d<sub>6</sub>) δ: 10.87 (br, 2H), 7.57-7.49 (m, 6H), 7.43 (d, *J* = 7.1 Hz, 4H), 7.29 – 7.23 (m, 5H), 7.11 (t, *J* = 7.1 Hz, 1H), 6.67 (br, 2H), 5.53 (s, 1H), 1.99 (s, 3H), 1.91 (s, 3H). <sup>13</sup>C-NMR (101 MHz, DMSO-d<sub>6</sub>) δ: 161.66, 160.10, 157.53, 157.38, 155.44, 154.19, 152.28, 150.36, 130.50, 130.47, 130.41, 130.10, 130.00, 129.93, 128.26, 127.24, 106.87, 70.28, 34.12, 32.37, 21.58.

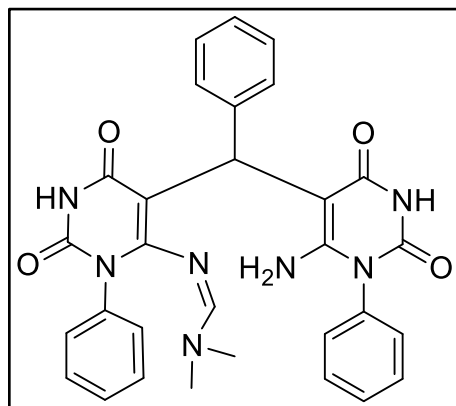

**N'-(5-((6-amino-2,4-dioxo-1-phenyl-1,2,3,4-tetrahydropyrimidin-5-yl)(4-fluorophenyl)methyl)-2,6-dioxo-3-phenyl-1,2,3,6-tetrahydropyrimidin-4-yl)-N,N-dimethylformimidamide (5dc).**

The reaction was performed according to the general procedure employing amide (**1d**, 1 mmol, 1.00 equiv.), aldehyde (**2c**, 1 mmol, 1.00 equiv.), and cyanoacetic acid (**3**, 170 mg, 2.00 mmol, 2.00 equiv.). Purification by silica gel column chromatography (8:2) (EtOAc: hexane) afforded **5dc** (61 %) as a solid white precipitate.

**<sup>1</sup>H-NMR** (500 MHz, DMSO-*d*<sub>6</sub>) δ: 11.16 (s, 1H), 10.63 (s, 1H), 7.56-7.46 (m, 4H), 7.44-7.38 (m, 3H), 7.34 (t, *J* = 7.3 Hz, 2H), 7.15-7.12 (m, 4H, merge), 7.00 (t, *J* = 8.8 Hz, 2H), 6.60 (br, 2H), 5.61 (s, 1H), 2.73 (s, 3H), 2.40 (s, 3H). **<sup>13</sup>C-NMR** (101 MHz, DMSO-*d*<sub>6</sub>) δ: 172.72, 165.89, 162.93, 159.72, 155.55, 154.41, 150.89, 150.67, 138.93, 137.47, 135.05, 130.37, 130.30, 130.19, 130.14, 130.08, 129.80, 129.04, 128.97, 128.90, 128.82, 128.29, 100.21, 87.70, 35.68, 33.75, 21.57.

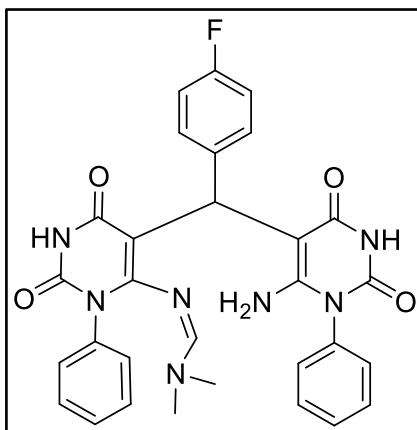

**N'-(5-((6-amino-2,4-dioxo-1-phenyl-1,2,3,4-tetrahydropyrimidin-5-yl)(2-chlorophenyl)methyl)-2,6-dioxo-3-phenyl-1,2,3,6-tetrahydropyrimidin-4-yl)-N,N-dimethylformimidamide (5dd).**

The reaction was performed according to the general procedure employing amide (**1d**, 1 mmol, 1.00 equiv.), aldehyde (**2d**, 141mg, 1 mmol, 1.00 equiv.), and cyanoacetic acid (**3**, 170 mg, 2.00 mmol, 2.00 equiv.). Purification by silica gel column chromatography (9:1) (EtOAc: hexane) afforded 5dd (55 %) as a solid white precipitate.

**<sup>1</sup>H-NMR** (400 MHz, DMSO-*d*<sub>6</sub>) δ: 11.03 (s, 1H), 10.76 (s, 1H), 7.56 – 7.18 (m, 15H, merge), 6.32 (br, 2H), 5.49 (s, 1H). **<sup>13</sup>C-NMR** (101 MHz, DMSO-*d*<sub>6</sub>) δ: 162.77, 162.23, 159.65, 157.82, 156.39, 152.19, 151.46, 133.62, 129.40, 124.73, 113.86, 86.11, 82.17, 40.84, 34.94, 30.34, 30.11, 28.10, 27.63.

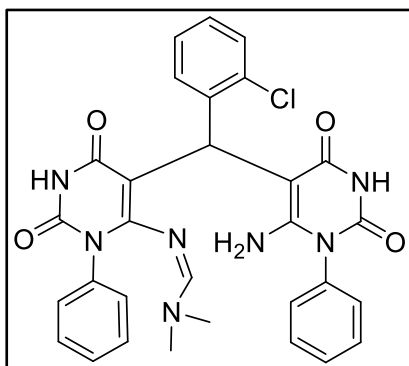

**N'-((6-amino-2,4-dioxo-1-phenyl-1,2,3,4-tetrahydropyrimidin-5-yl)(2-chloro-4-methoxyphenyl)methyl)-2,6-dioxo-3-phenyl-1,2,3,6-tetrahydropyrimidin-4-yl)-N,N-dimethylformimidamide (5de).**

The reaction was performed according to the general procedure employing amide (**1d**, 1 mmol, 1.00 equiv.), aldehyde (**2e**, 1 mmol, 1.00 equiv.), and cyanoacetic acid (**3**, 2.00 mmol, 2.00 equiv.). Purification by silica gel column chromatography (9:1) (EtOAc: hexane) afforded **5de** (58 %) as a solid white precipitate.

**<sup>1</sup>H-NMR** (400 MHz, DMSO-*d*<sub>6</sub>) δ: 11.62 (s, 1H), 11.36 (d, 1H), 7.40 – 7.14 (m, 13H, merge), 7.02 (d, *J* = 8.4 Hz, 2H), 6.73 (d, *J* = 8.6Hz, 2H), 5.46 (s, 1H), 3.66 (s, 3H), 2.62 (s, 3H), 2.37 (s, 3H). **<sup>13</sup>C-NMR** (101 MHz, DMSO-*d*<sub>6</sub>) δ: 162.76, 162.06, 159.64, 156.39, 155.10, 152.07, 142.06, 129.17, 125.64, 120.66, 85.64, 82.18, 40.84, 34.94, 30.32, 27.63.

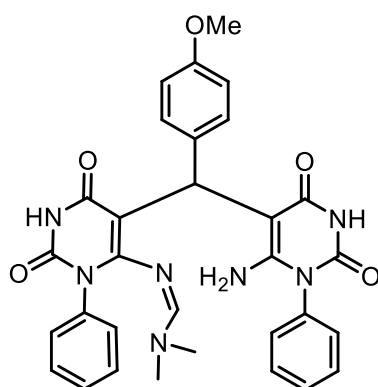

## 8. Controlled reaction for the mechanism study

### 8.1 Radical trapping reaction

To more insight into the mechanism, the reaction was further investigated under different radical trapping reagents. Initially, we carried out the reaction with 1 equivalent of TEMPO and the reaction was inhibited by 32%. However, the reaction was totally inhibited by 5 equivalents of TEMPO. The reaction was also inhibited by 5 equivalents of BHT. Therefore, the formation of the product **4aa** was initiated through a radical-mediated pathway. Further, a single electron scavenger CuCl<sub>2</sub>, inhibit the reaction, which proved that reaction proceed through a SET process.



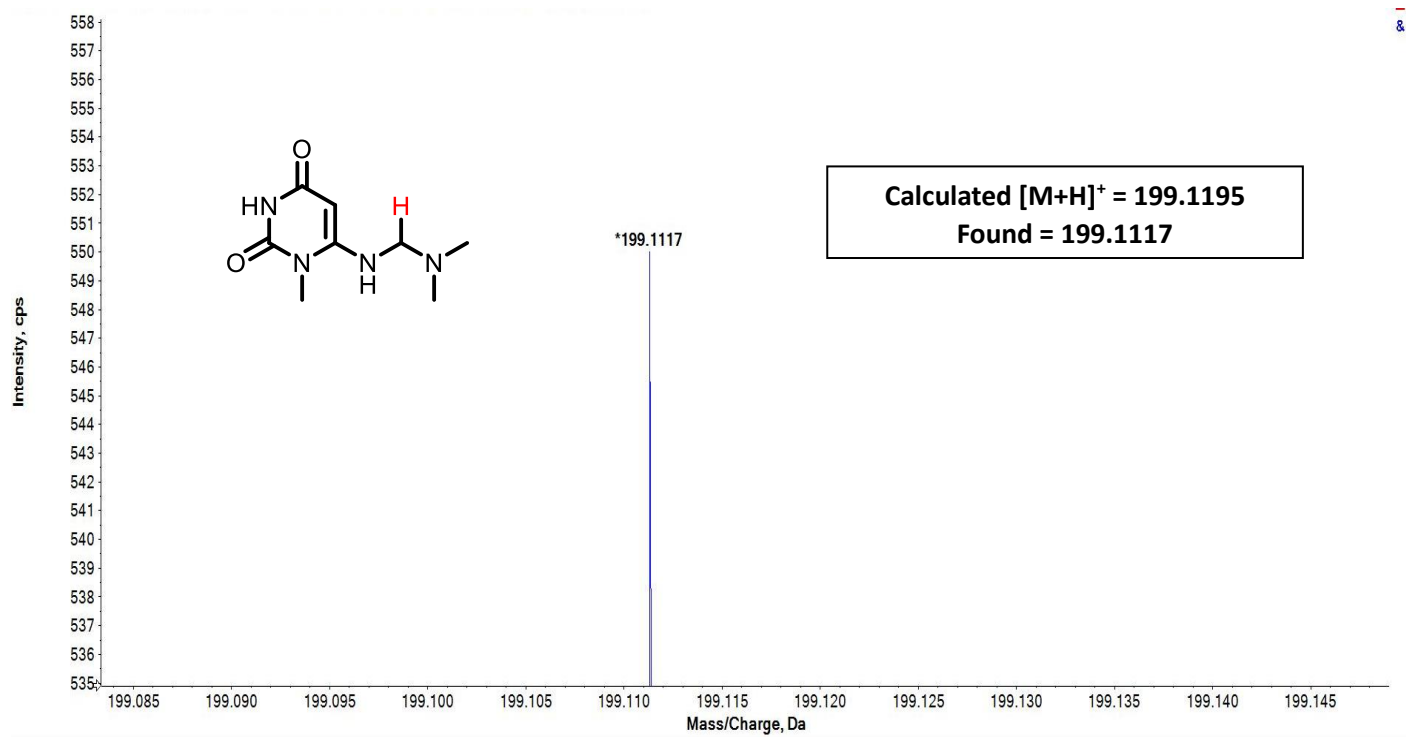

**Figure S3.** HRMS analysis for radical trapping reaction with BHT.

## 8.2 UV-visible analysis

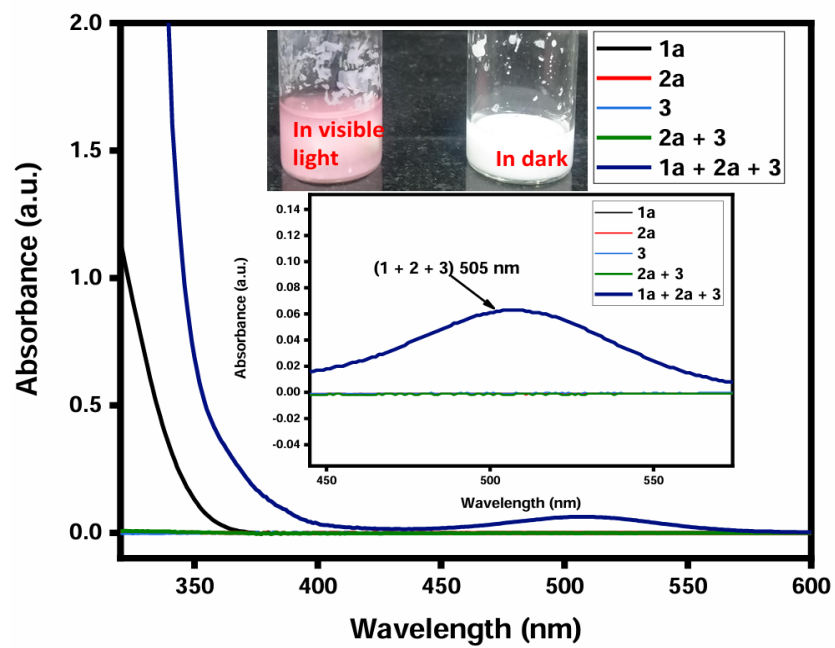

**Figure S4.** UV-vis absorption measurements in acetonitrile with respect to various substrates.

### 8.3 TD-DFT study

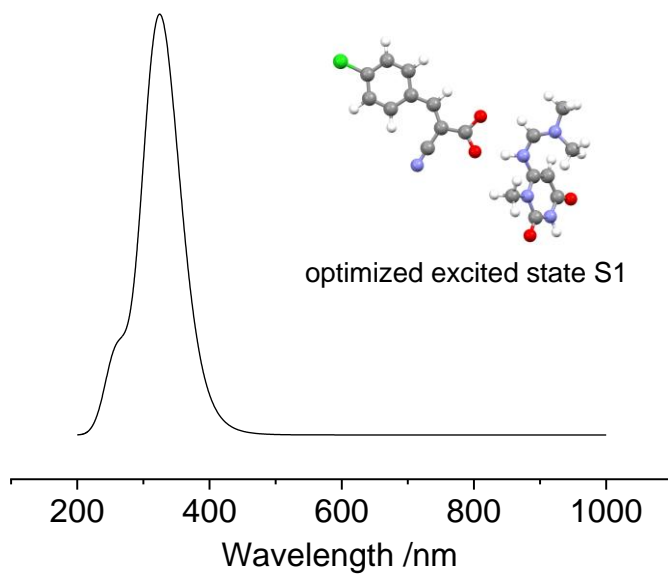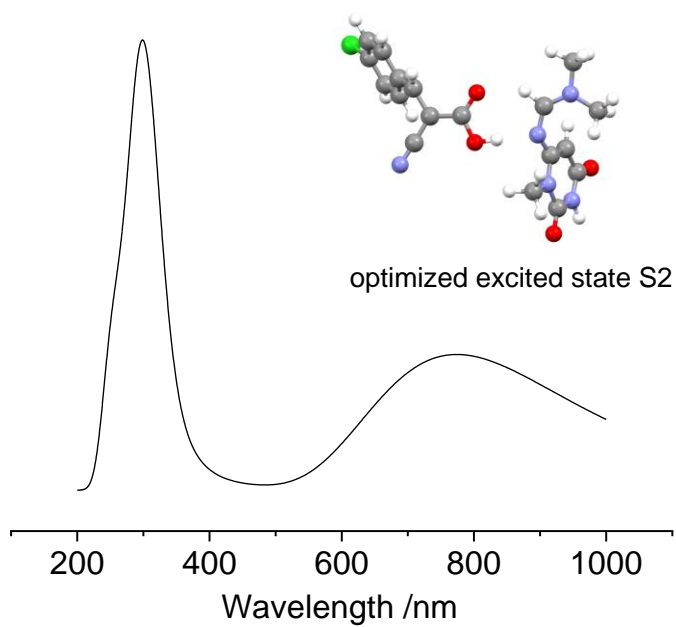

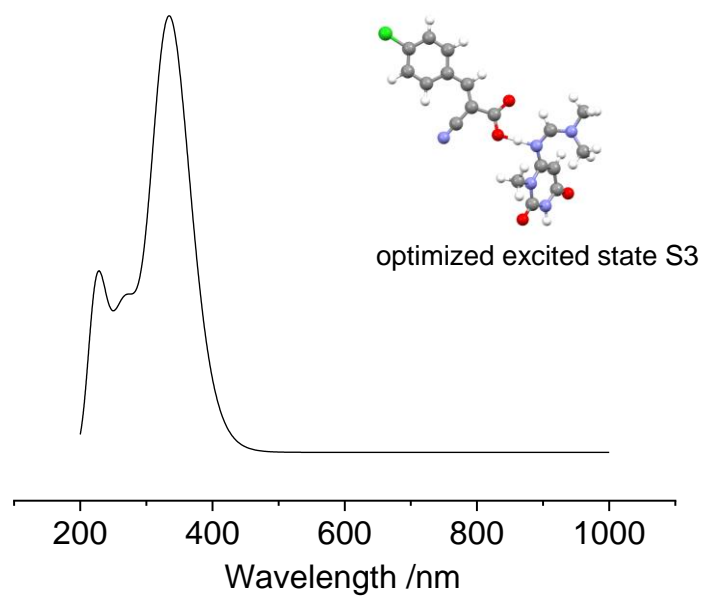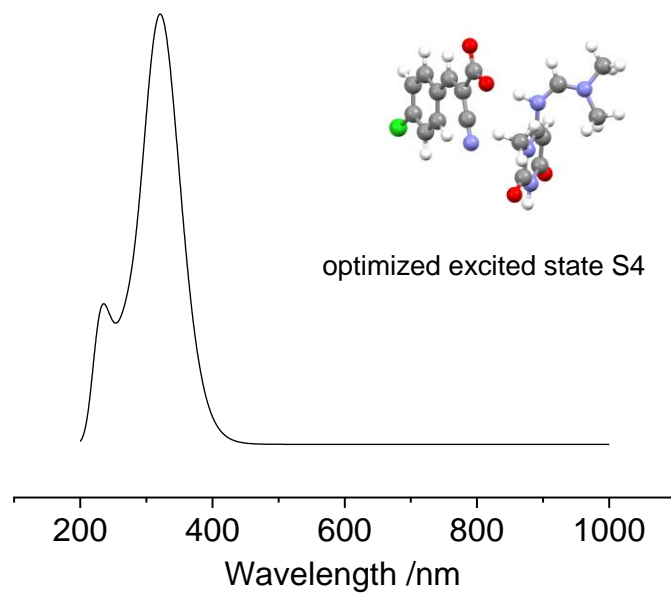

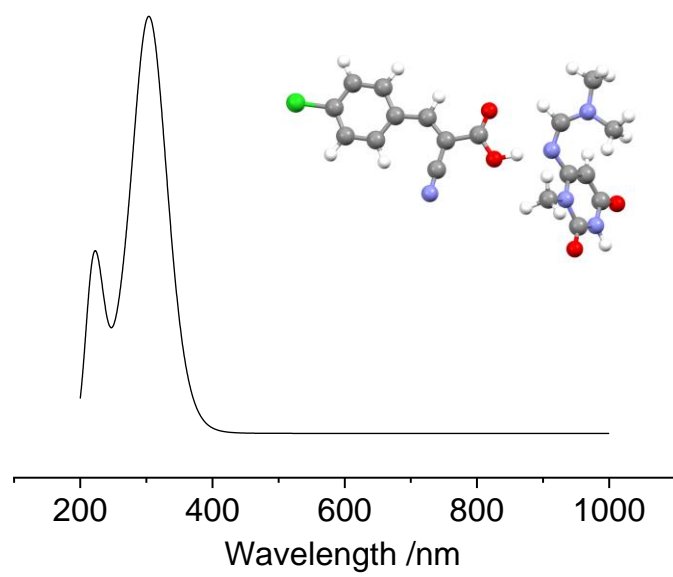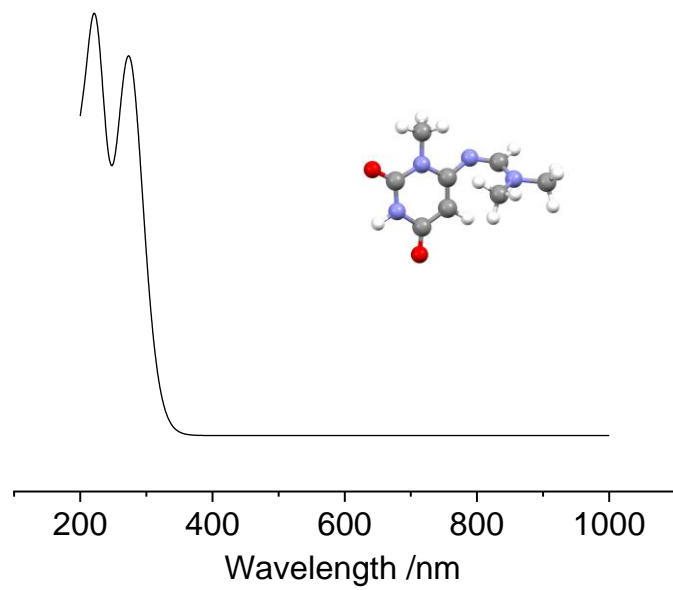

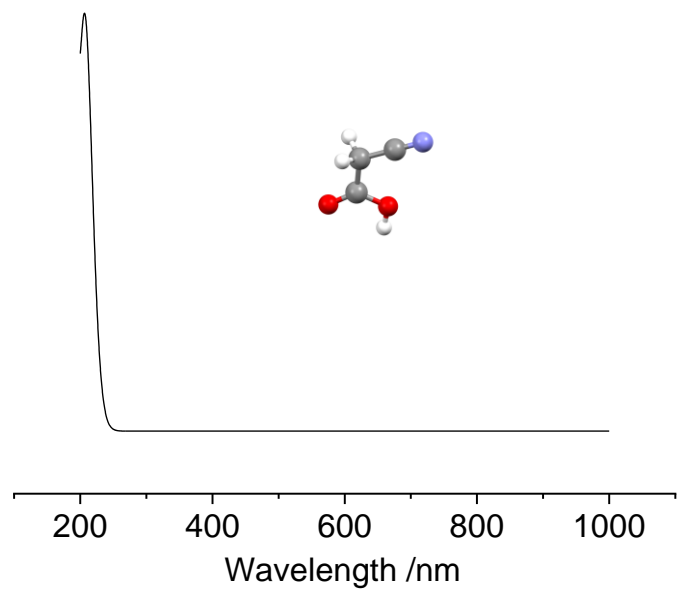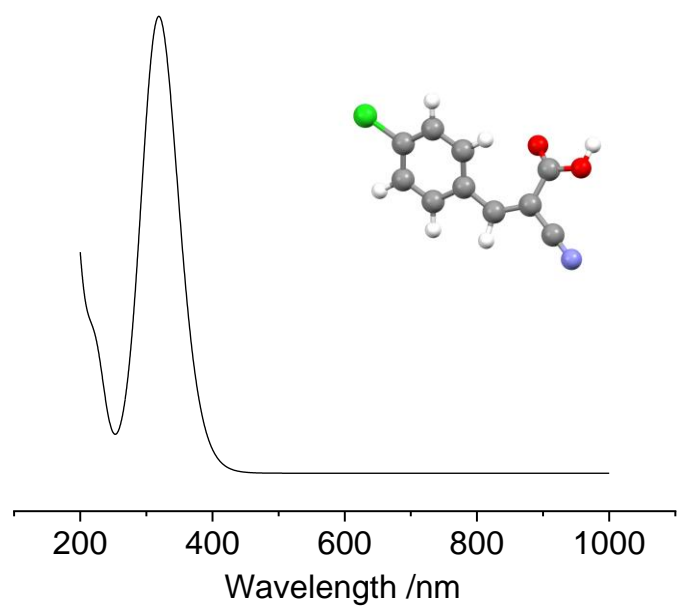

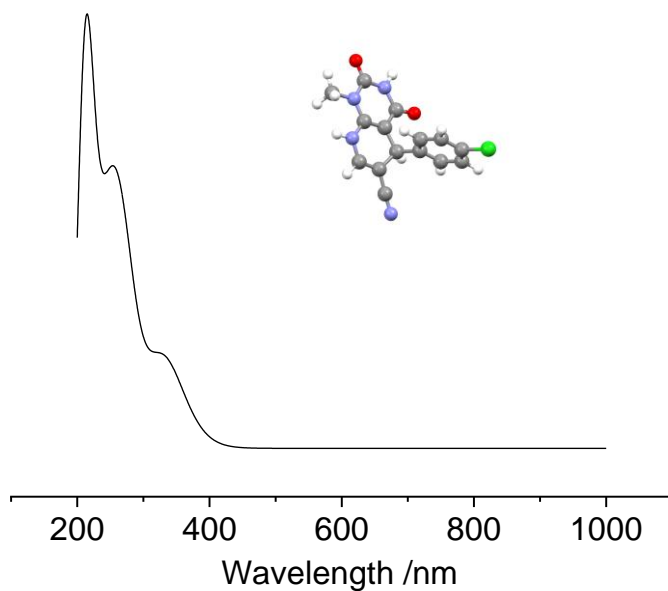

**Figure S5.** Theoretical UV-Visible spectra of different EDA complexes was calculated by TD-DFT at the PBE0/aug-cc-pVDZ level considering acetonitrile as a solvent.

## 9. Cyclic voltammetry study

Cyclic voltammetry was carried out with a Pt as counter electrode “CE”, a glassy carbon electrode as working electrode “WE” and Ag/AgCl as references electrode “RE” using METROHM electrochemical workstation (PGSTAT 204) with BA.MAC.204.S module. Before use, the “WE” was cleaned with an alumina suspension (BASi) and washed with distilled water repeatedly. The RE was washed with electrolyte solution as well as distilled water and stored in 3.0M KCl solution. Purified ferrocene (recrystallized from n-hexane) was used as an internal standard. Commercially available  ${}^n\text{Bu}_4\text{N.PF}_6$  was used as an electrolyte. The measurement was conducted at a concentration of 10 mM containing 0.1 mM  ${}^n\text{Bu}_4\text{N.PF}_6$  in acetonitrile solvent with a scan rate 0.1 V/s.

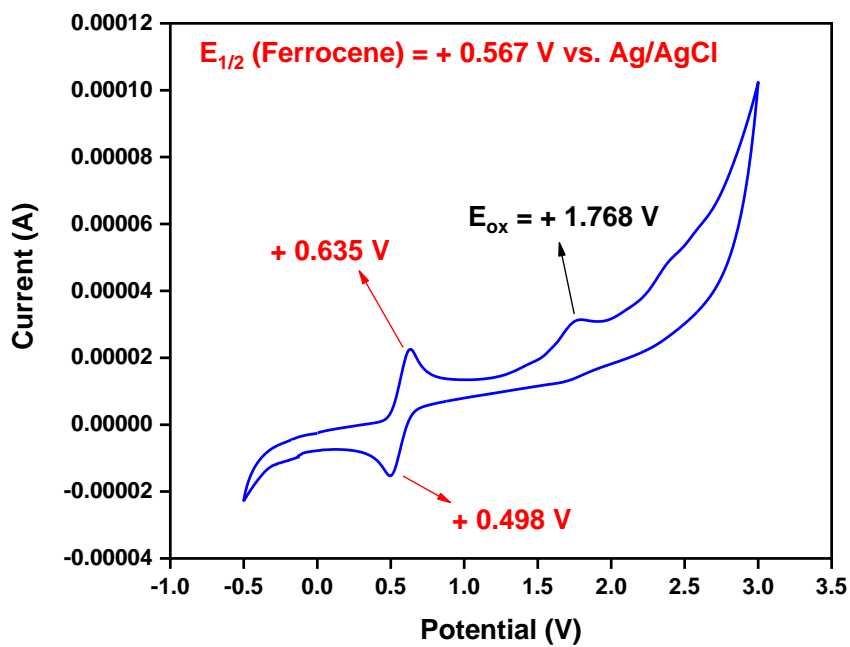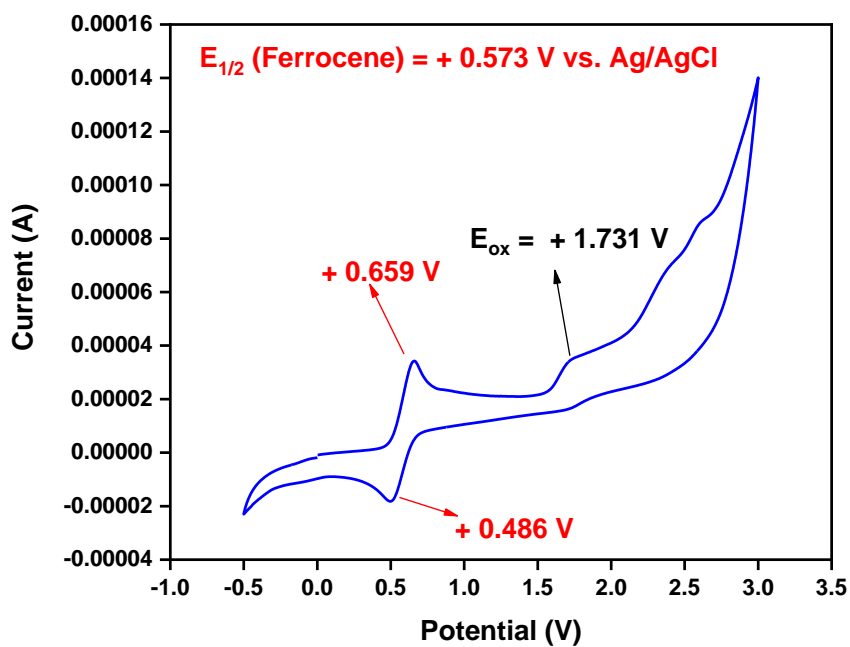

**Figure S6.** Cyclic voltammetry of reaction mixture at different time intervals.

## 10. Plausible reaction mechanism in the dark condition

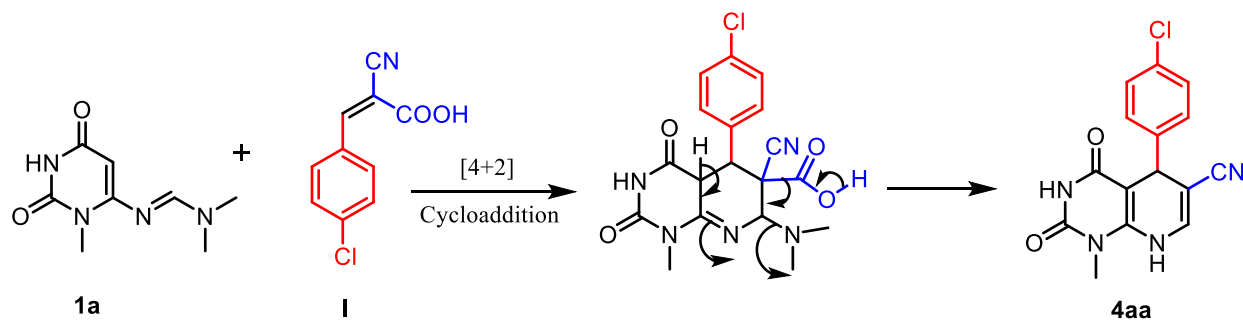

**Scheme S2.** Plausible reaction mechanism in the dark condition.

## 11. HRMS data for detecting the key intermediates in the case of two equivalent of cyanoacetic acid under dark condition

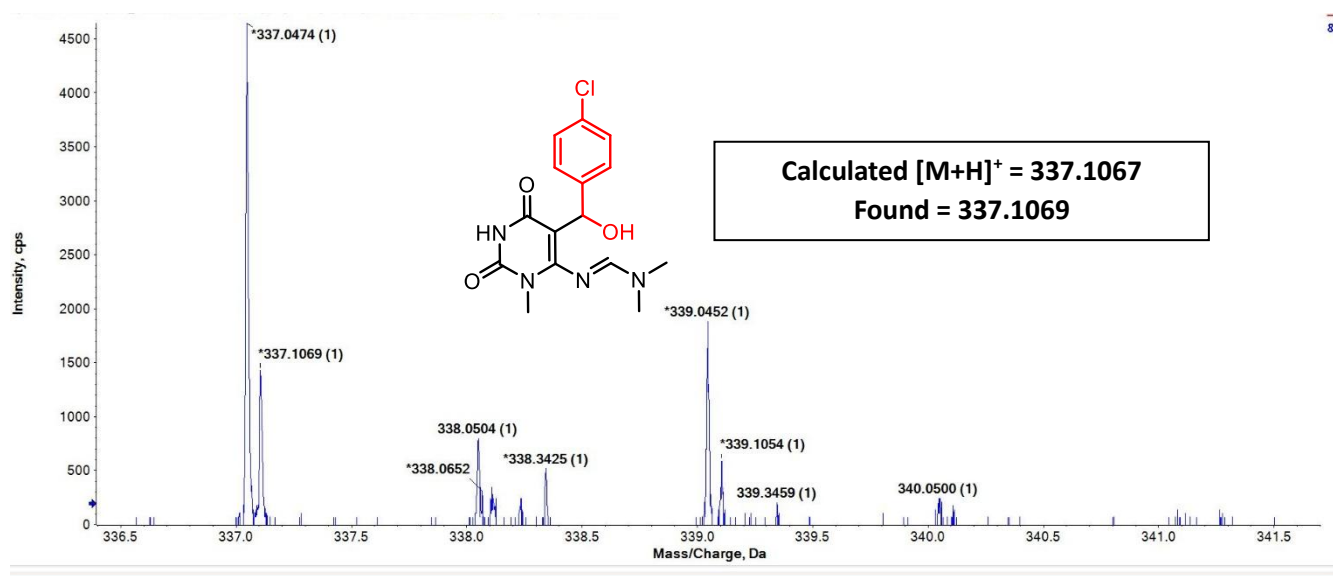

**Figure S7.** HRMS data of intermediate **E** as per the scheme 6 in the main manuscript.

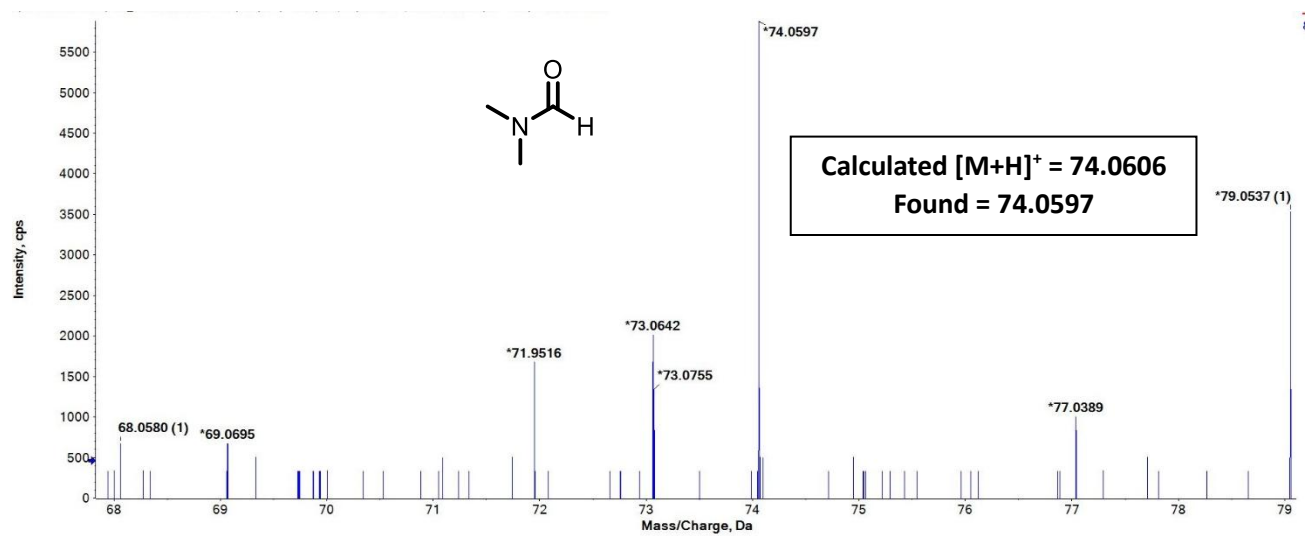

**Figure S8.** Detection of **DMF** as per the scheme 6 in the main manuscript.

## 12. Atom economy for both products

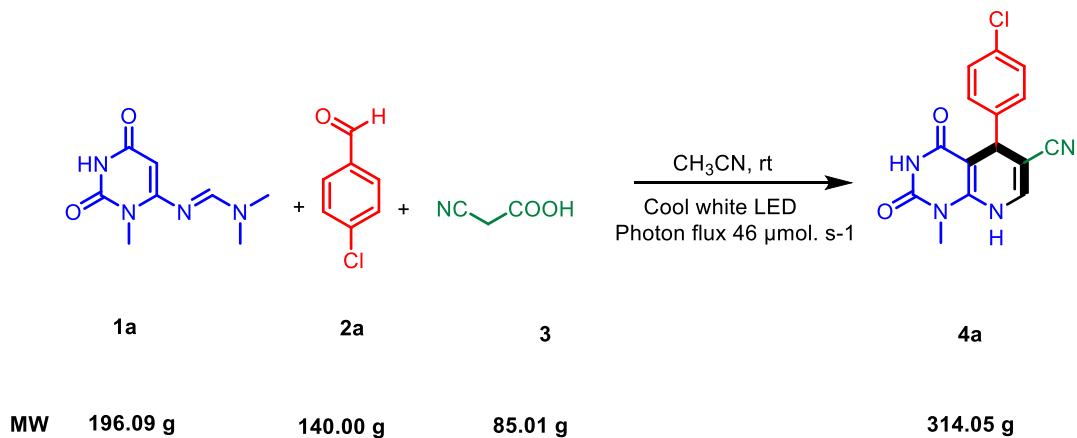

| Product | Atom Economy (%) |
|---------|------------------|
| 4aa     | 74.57            |
| 4ab     | 73.10            |
| 4ac     | 73.75            |
| 4ad     | 73.29            |
| 4ae     | 75.22            |
| 4af     | 74.57            |
| 4ag     | 67.07            |
| 4ah     | 69.70            |
| 4ai     | 74.66            |
| 4ba     | 75.39            |
| 4bb     | 73.31            |
| 4bc     | 74.21            |
| 4bd     | 70.84            |
| 4ca     | 75.39            |
| 4cb     | 73.31            |
| 4cc     | 75.17            |
| 4cd     | 74.21            |
| 4ce     | 72.91            |
| 4da     | 77.84            |

|            |       |
|------------|-------|
| <b>4db</b> | 76.16 |
| <b>4dc</b> | 77.08 |
| <b>4dd</b> | 77.84 |
| <b>4de</b> | 77.65 |

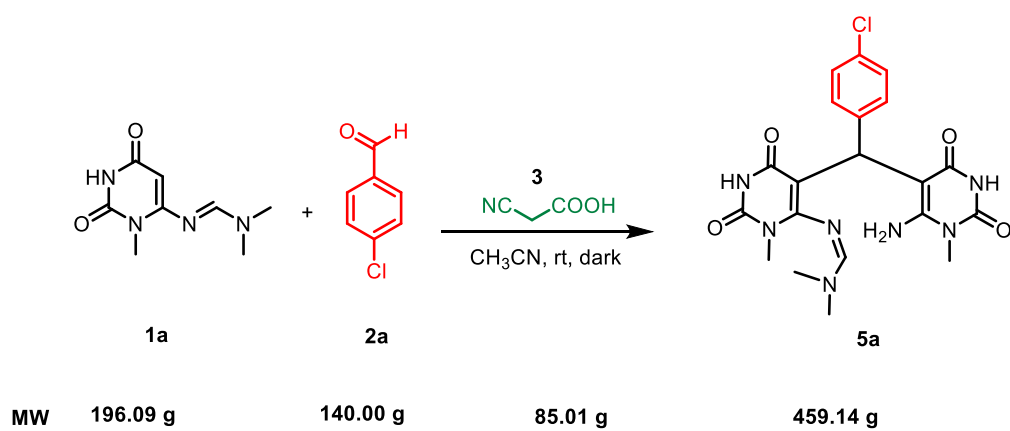

| Product    | Atom Economy (%) |
|------------|------------------|
| <b>5aa</b> | 86.27            |
| <b>5ab</b> | 85.34            |
| <b>5ac</b> | 85.74            |
| <b>5ad</b> | 86.17            |
| <b>5ae</b> | 85.85            |
| <b>5af</b> | 86.27            |
| <b>5ag</b> | 85.51            |
| <b>5ah</b> | 85.51            |
| <b>5ba</b> | 86.96            |
| <b>5bb</b> | 86.12            |
| <b>5bc</b> | 86.57            |
| <b>5bd</b> | 86.87            |
| <b>5be</b> | 86.27            |
| <b>5ca</b> | 86.96            |
| <b>5cb</b> | 86.12            |
| <b>5cc</b> | 86.57            |
| <b>5da</b> | 88.88            |
| <b>5db</b> | 88.26            |
| <b>5dc</b> | 88.59            |
| <b>5dd</b> | 88.86            |
| <b>5de</b> | 88.80            |

### 13. Single-crystal X-ray analysis

Crystals suitable for single X-ray diffraction were grown by slow evaporation of methanol-water solvent mixtures. Both crystals are stable at room temperature and in open air. Single crystal X-ray data of compound **4aa** was determined using Bruker D8 VENTURE diffractometer with PHOTON II detector and a Mo-K $\alpha$  radiation ( $\lambda = 0.71073 \text{ \AA}$ ). Cell refinement and data reduction was carried out using SAINT V8.40B software package. SADABS-2016/2 (Bruker, 2016/2) was used for absorption correction. The X-ray data for compound **5aa** was collected using Rigaku Oxford Diffraction SuperNova diffractometer with a EoS2 CCD detector and a Mo-K $\alpha$  radiation ( $\lambda = 0.71073 \text{ \AA}$ ). CrysAlisPro 1.171.42.49 (Rigaku OD, 2022) program package was used for cell refinement, data collection and reduction. The absorption correction was carried out using CrysAlisPro 1.171.42.49. Crystal data and cell refinement for compound **4aa** and **5aa** are given below.

#### Crystal data for compound **4aa** (CCDC = 2519491)

- Chemical formula: C<sub>15</sub>H<sub>11</sub>ClN<sub>4</sub>O<sub>2</sub>
- Chemical formula weight: 314.73
- Temperature: 298 K
- Crystal system: monoclinic
- Space group: P 1 21/c 1
- a (Å): 8.1146(6)
- b (Å): 13.822(1)
- c (Å): 13.2561(8)
- $\alpha$ : 90
- $\beta$ : 98.439(3)
- $\lambda$ : 90
- Cell volume: 1470.71(18)
- Cell formula unit (Z): 4
- Dx (g/cm<sup>3</sup>): 1.421
- $\mu$  (mm<sup>-1</sup>): 0.272
- F (000): 640.0
- Tmin, Tmax: 0.679, 0.746
- R (reflection): 0.0370 (2385)
- wR2 (reflection): 0.1044 (2683)

- Data completeness: 0.999

Datablock dp\_modch - ellipsoid plot

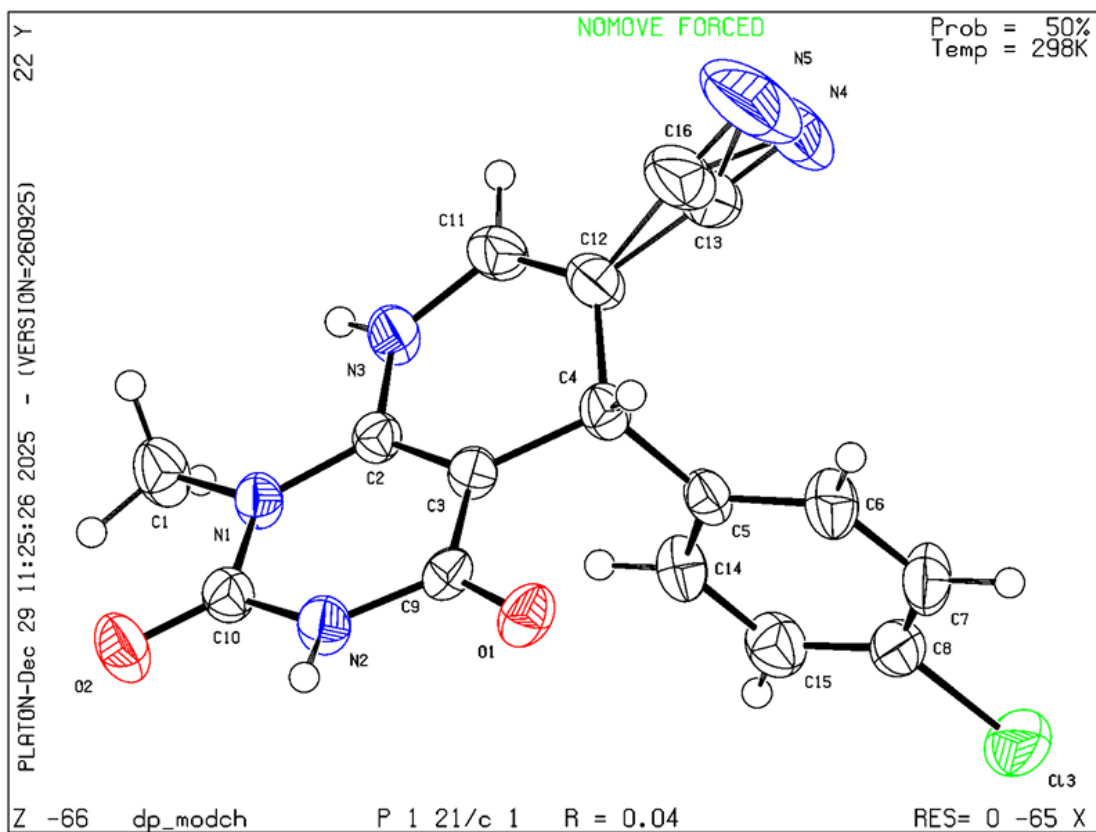

### Crystal data for compound 5aa (CCDC = 2519497)

- Chemical formula:  $C_{20}H_{22}ClN_6O_5$
- Chemical formula weight: 488.91
- Temperature: 293 K
- Crystal system: monoclinic
- Space group: P 1 21/n 1
- a (Å): 8.0227 (11)
- b (Å): 20.042 (3)
- c (Å): 15.413 (2)
- $\alpha$ : 90
- $\beta$ : 102.697 (14)
- $\lambda$ : 90

- Cell volume: 2417.7 (6)
- Cell formula unit (Z): 4
- Dx (g/cm<sup>3</sup>): 1.343
- $\mu$  (mm<sup>-1</sup>): 0.207
- F (000): 1024.0
- Tmin, Tmax: 0.537, 1.000
- R (reflection): 0.0957 (1822)
- wR2 (reflection): 0.2961 (4084)
- Data completeness: 0.990

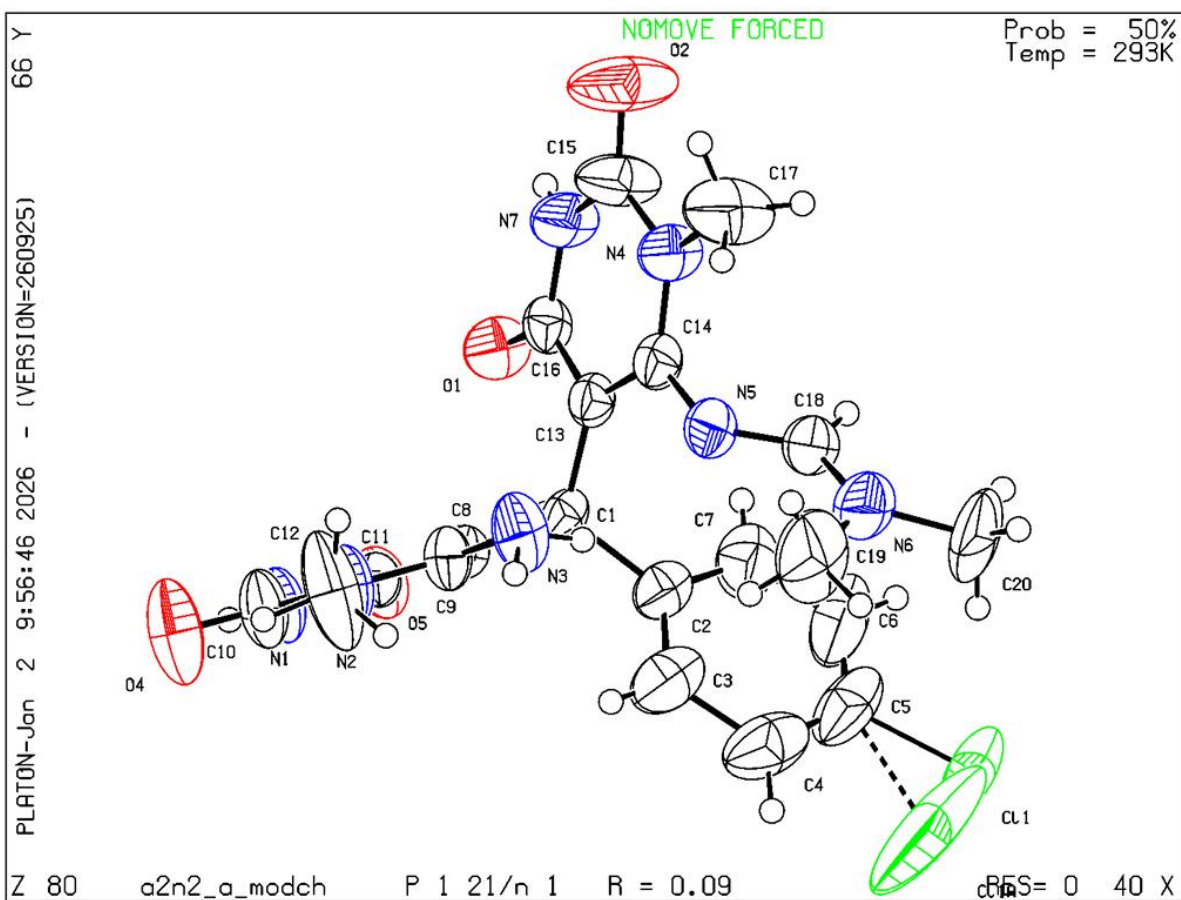

The crystal of compound **5aa** containing disorder, which is further supported by DFT optimized structure. The structure of **5aa** was optimized by means of the B3LYP/3-21G basis set. The FT-IR spectra of optimized structure was aligning with the experimental one.

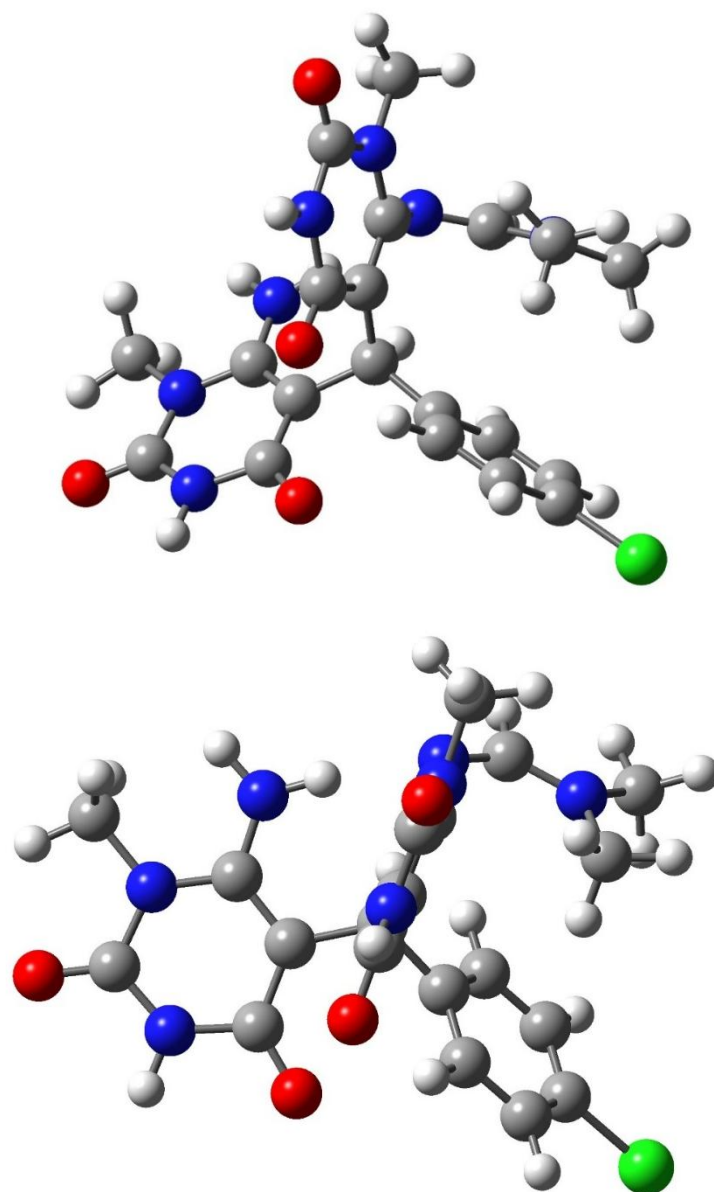

**Figure S9.** Optimized structure of compound **5aa** was collected from the DFT method with the basis set of B3LYP-3-21G for all the atoms.

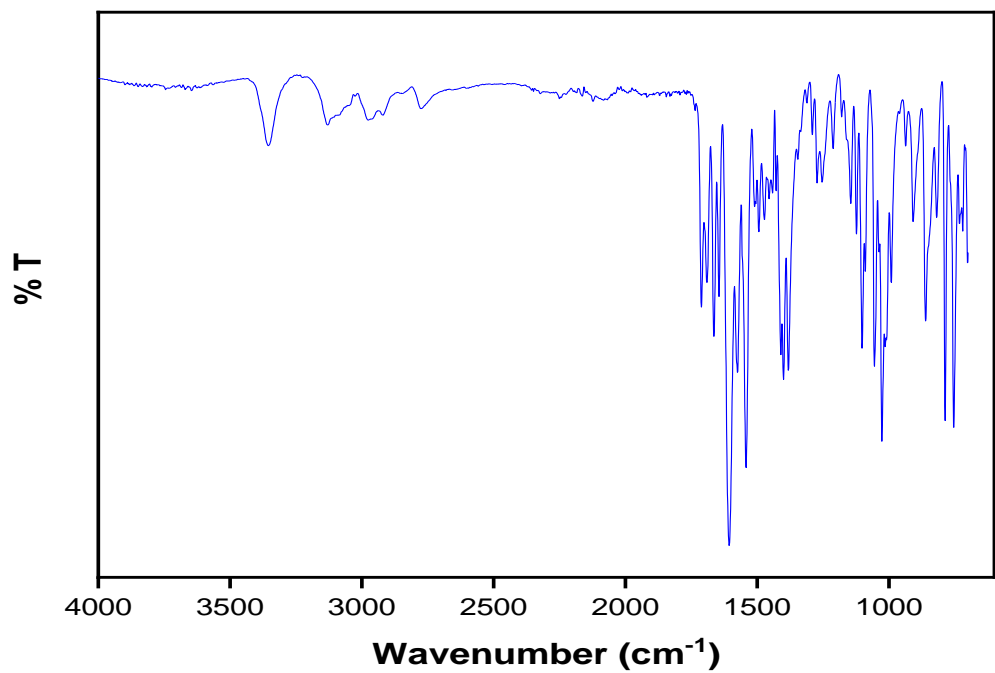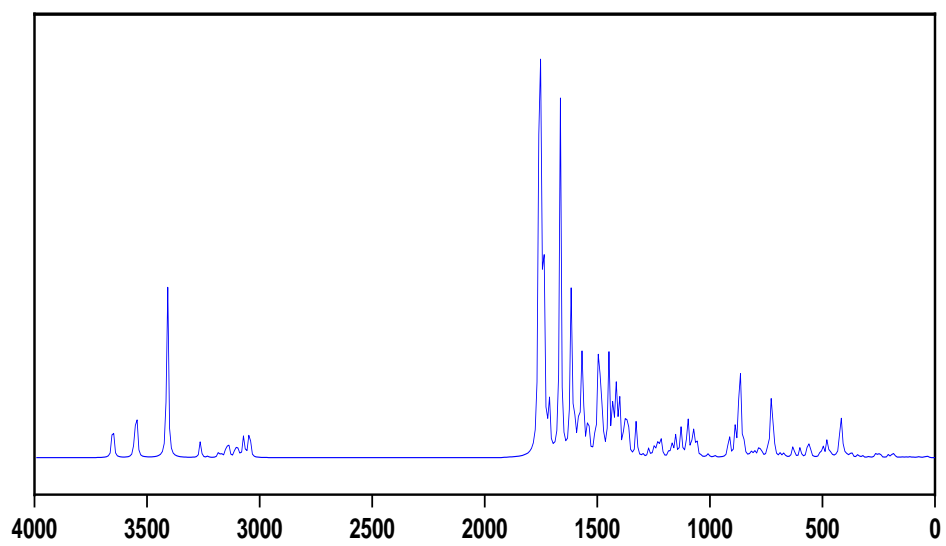

**Figure S10.** Experimental and theoretical FT-IR spectra of compound **5aa**.

## 14. Experimental antibacterial study

### 14.1 Experimental procedure for antibacterial activity

To sum up, various concentrations of the test substances were prepared using Milli Q-grade water. *E. coli* and *B. cereus* cells were re-cultured and purified in LB broth. The growth inhibition procedures were carried out by inoculating fixed quantities of (0, 5, 10, 25, 50, 100, 250, and 500  $\mu\text{g/mL}$  in 10% DMSO) in LB broth fixed with predefined concentrations of *E. coli* and *B. cereus* cells. The cells were allowed to grow at 37°C, with the OD measured after 12 hours and as well as after 24 hours to achieve stationary growth. The OD at 24 hours was used to compute the  $\text{IC}_{50}$  for the examined compounds. For determining MBC, a fixed volume of the  $\text{IC}_{50}$  determinants was plated in LB-agar plates, and the cells were allowed to grow at 37°C for 24 hours before the number of viable cells was calculated. All the experiments were repeated in triplicate to minimize the chances of experimental error. OriginPro and Microsoft Excel were used to determine the  $\text{IC}_{50}$  value and % inhibition of the compounds.

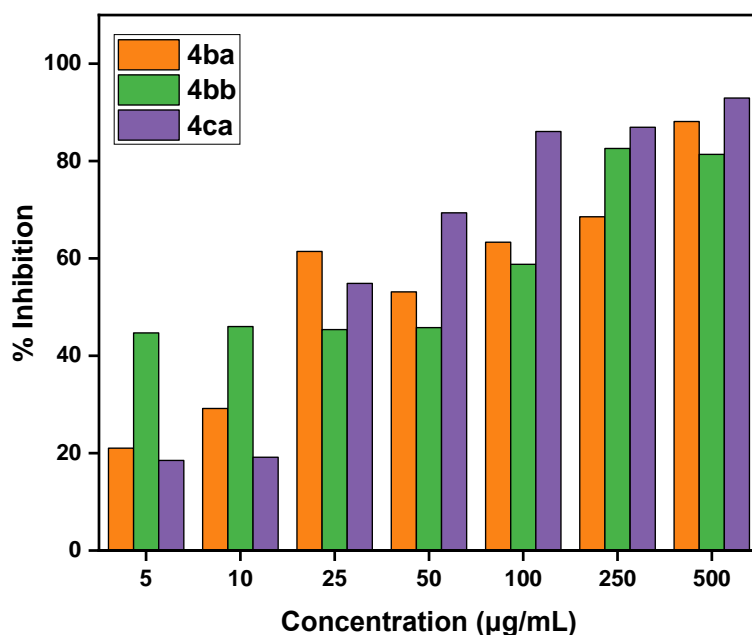

**Figure S11.** The percentage inhibition of the active compounds against *E. coli*.

### 14.2 Stability of the compound

We detected all the compound in methanol solvent using high-resolution mass spectrometry (HRMS) and single crystal X-ray diffraction (SC-XRD), indicating its stability in this solvent. However, we performed the biological analysis in 10 % DMSO-water solution. Therefore, we examined the stability of compounds **4aa** in different solvents such as methanol, water, and 10% DMSO using a UV-visible spectrophotometer (**Figure 2**). In the absorbance spectra, compound **4aa** shows the same  $\gamma_{\text{max}}$  value (338 nm) in the corresponding solvents. This result validated the compound stability in a 10 % DMSO-water solution.

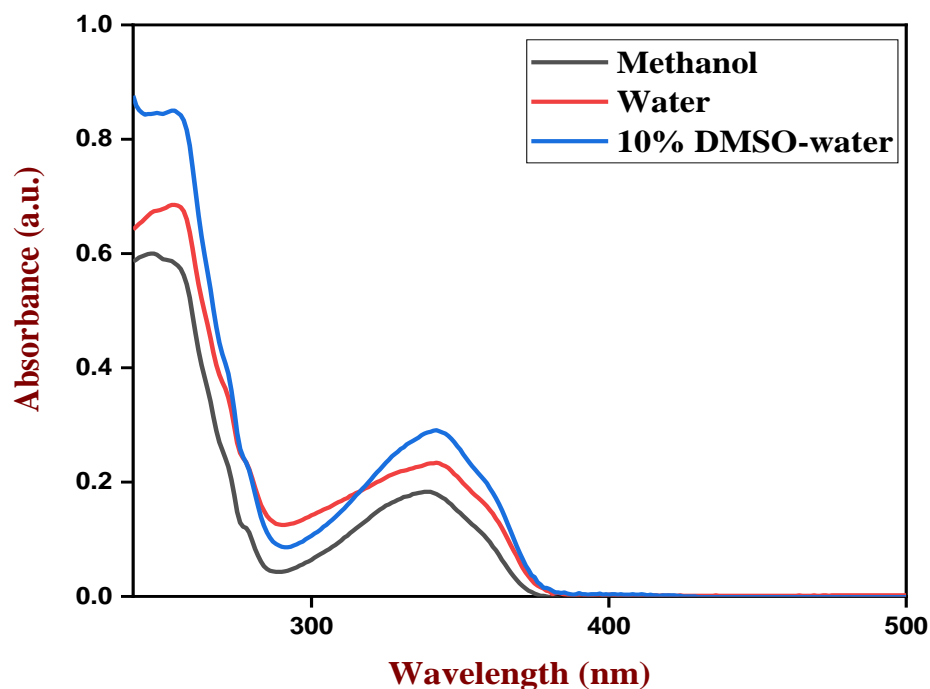

**Figure S12.** The absorbance spectra of compound **4aa**.

**Table S2.** Inhibition activity of **4aa** at different concentrations against *E. coli*.

| $\mu\text{g/mL}$ | SET 1 | SET 2  | SET 3 | N Total | Mean     | SD       | SEM      | Median | % Inhibition |
|------------------|-------|--------|-------|---------|----------|----------|----------|--------|--------------|
| 0                | 1.005 | 0.993  | 1.109 | 3       | 1.035667 | 0.063791 | 0.03683  | 1.005  |              |
| 5                | 1.017 | 1.021  | 0.994 | 3       | 1.010667 | 0.014572 | 0.008413 | 1.017  | 2.413904     |
| 10               | 0.985 | 0.991  | 0.976 | 3       | 0.984    | 0.00755  | 0.004359 | 0.985  | 4.988735     |
| 25               | 1.047 | 0.1001 | 0.995 | 3       | 0.714033 | 0.532317 | 0.307333 | 0.995  | 31.05568     |
| 50               | 0.514 | 0.599  | 0.613 | 3       | 0.575333 | 0.053575 | 0.030932 | 0.599  | 44.44802     |
| 100              | 0.471 | 0.521  | 0.393 | 3       | 0.461667 | 0.064508 | 0.037244 | 0.471  | 55.42324     |
| 250              | 0.245 | 0.269  | 0.311 | 3       | 0.275    | 0.033407 | 0.019287 | 0.269  | 73.44706     |
| 500              | 0.141 | 0.165  | 0.117 | 3       | 0.141    | 0.024    | 0.013856 | 0.141  | 86.38558     |

**Table S3.** Inhibition activity of **4ab** at different concentrations against *E. coli*.

| $\mu\text{g/mL}$ | SET 1 | SET 2 | SET 3 | N Total | Mean     | SD       | SEM      | Median | % Inhibition |
|------------------|-------|-------|-------|---------|----------|----------|----------|--------|--------------|
| 0                | 1.125 | 1.049 | 1.131 | 3       | 1.101667 | 0.045709 | 0.02639  | 1.125  |              |
| 5                | 1.017 | 1.005 | 0.996 | 3       | 1.006    | 0.010536 | 0.006083 | 1.005  | 8.683812     |

|     |       |       |       |   |          |          |          |       |          |
|-----|-------|-------|-------|---|----------|----------|----------|-------|----------|
| 10  | 0.985 | 0.979 | 0.991 | 3 | 0.985    | 0.006    | 0.003464 | 0.985 | 10.59002 |
| 25  | 0.847 | 0.731 | 0.659 | 3 | 0.745667 | 0.094854 | 0.054764 | 0.731 | 32.31467 |
| 50  | 0.514 | 0.498 | 0.503 | 3 | 0.505    | 0.008185 | 0.004726 | 0.503 | 54.16036 |
| 100 | 0.471 | 0.467 | 0.442 | 3 | 0.46     | 0.015716 | 0.009074 | 0.467 | 58.24508 |
| 250 | 0.245 | 0.233 | 0.218 | 3 | 0.232    | 0.013528 | 0.00781  | 0.233 | 78.941   |
| 500 | 0.141 | 0.116 | 0.152 | 3 | 0.136333 | 0.018448 | 0.010651 | 0.141 | 87.62481 |

**Table S4.** Inhibition activity of **4ac** at different concentrations against *E. coli*.

| $\mu\text{g/mL}$ | SET 1 | SET 2 | SET 3 | N Total | Mean     | SD       | SEM      | Median | % Inhibition |
|------------------|-------|-------|-------|---------|----------|----------|----------|--------|--------------|
| 0                | 0.956 | 1.12  | 0.995 | 3       | 1.023667 | 0.085676 | 0.049465 | 0.995  |              |
| 5                | 0.983 | 0.983 | 1.007 | 3       | 0.991    | 0.013856 | 0.008    | 0.983  | 3.191143     |
| 10               | 0.79  | 0.831 | 0.71  | 3       | 0.777    | 0.061539 | 0.035529 | 0.79   | 24.09639     |
| 25               | 0.713 | 0.79  | 0.687 | 3       | 0.73     | 0.053563 | 0.030925 | 0.713  | 28.68772     |
| 50               | 0.559 | 0.541 | 0.494 | 3       | 0.531333 | 0.033561 | 0.019376 | 0.541  | 48.09508     |
| 100              | 0.368 | 0.319 | 0.372 | 3       | 0.353    | 0.029513 | 0.017039 | 0.368  | 65.51612     |
| 250              | 0.325 | 0.293 | 0.332 | 3       | 0.316667 | 0.020793 | 0.012005 | 0.325  | 69.06545     |
| 500              | 0.088 | 0.181 | 0.076 | 3       | 0.115    | 0.057472 | 0.033181 | 0.088  | 88.76587     |

**Table S5.** Inhibition activity of **4ad** at different concentrations against *E. coli*.

| $\mu\text{g/mL}$ | SET 1 | SET 2 | SET 3 | N Total | Mean     | SD       | SEM      | Median | % Inhibition |
|------------------|-------|-------|-------|---------|----------|----------|----------|--------|--------------|
| 0                | 0.956 | 1.106 | 0.942 | 3       | 1.001333 | 0.090914 | 0.052489 | 0.956  |              |
| 5                | 0.943 | 1.029 | 0.996 | 3       | 0.989333 | 0.043386 | 0.025049 | 0.996  | 1.198402     |
| 10               | 0.806 | 0.763 | 0.792 | 3       | 0.787    | 0.021932 | 0.012662 | 0.792  | 21.40479     |
| 25               | 0.922 | 0.829 | 0.791 | 3       | 0.847333 | 0.067397 | 0.038912 | 0.829  | 15.37949     |
| 50               | 0.148 | 0.203 | 0.173 | 3       | 0.174667 | 0.027538 | 0.015899 | 0.173  | 82.55659     |
| 100              | 0.487 | 0.351 | 0.399 | 3       | 0.412333 | 0.068973 | 0.039822 | 0.399  | 58.82157     |
| 250              | 0.338 | 0.277 | 0.304 | 3       | 0.306333 | 0.030567 | 0.017648 | 0.304  | 69.40746     |
| 500              | 0.152 | 0.144 | 0.127 | 3       | 0.141    | 0.012767 | 0.007371 | 0.144  | 85.91877     |

**Table S6.** Inhibition activity of **4ah** at different concentrations against *E. coli*.

| $\mu\text{g/mL}$ | SET 1 | SET 2 | SET 3 | N Total | Mean     | SD       | SEM      | Median | % Inhibition |
|------------------|-------|-------|-------|---------|----------|----------|----------|--------|--------------|
| 0                | 1.12  | 1.108 | 1.151 | 3       | 1.126333 | 0.022189 | 0.012811 | 1.12   |              |
| 5                | 1.129 | 1.106 | 1.131 | 3       | 1.122    | 0.013892 | 0.008021 | 1.129  | 0.384729     |
| 10               | 1.003 | 0.953 | 1.09  | 3       | 1.015333 | 0.069328 | 0.040026 | 1.003  | 9.854987     |
| 25               | 0.923 | 0.868 | 0.942 | 3       | 0.911    | 0.038432 | 0.022189 | 0.923  | 19.11808     |
| 50               | 0.632 | 0.586 | 0.491 | 3       | 0.569667 | 0.071905 | 0.041514 | 0.586  | 49.42291     |
| 100              | 0.456 | 0.484 | 0.396 | 3       | 0.445333 | 0.044959 | 0.025957 | 0.456  | 60.46168     |
| 250              | 0.239 | 0.261 | 0.205 | 3       | 0.235    | 0.028213 | 0.016289 | 0.239  | 79.13584     |
| 500              | 0.105 | 0.111 | 0.11  | 3       | 0.108667 | 0.003215 | 0.001856 | 0.11   | 90.35218     |

**Table S7.** Inhibition activity of **4ba** at different concentrations against *E. coli*.

| $\mu\text{g/mL}$ | SET 1 | SET 2 | SET 3 | N Total | Mean     | SD       | SEM      | Median | % Inhibition |
|------------------|-------|-------|-------|---------|----------|----------|----------|--------|--------------|
| 0                | 0.971 | 1.105 | 0.993 | 3       | 1.023    | 0.071861 | 0.041489 | 0.993  |              |
| 5                | 0.791 | 0.862 | 0.771 | 3       | 0.808    | 0.047823 | 0.02761  | 0.791  | 21.01662     |
| 10               | 0.73  | 0.679 | 0.764 | 3       | 0.724333 | 0.042782 | 0.0247   | 0.73   | 29.19518     |
| 25               | 0.354 | 0.432 | 0.397 | 3       | 0.394333 | 0.039068 | 0.022556 | 0.397  | 61.45324     |
| 50               | 0.423 | 0.449 | 0.566 | 3       | 0.479333 | 0.076173 | 0.043979 | 0.449  | 53.14435     |
| 100              | 0.328 | 0.378 | 0.419 | 3       | 0.375    | 0.045574 | 0.026312 | 0.378  | 63.34311     |
| 250              | 0.348 | 0.329 | 0.288 | 3       | 0.321667 | 0.030665 | 0.017704 | 0.329  | 68.55653     |
| 500              | 0.11  | 0.137 | 0.117 | 3       | 0.121333 | 0.014012 | 0.00809  | 0.117  | 88.13946     |

**Table S8.** Inhibition activity of **4bb** at different concentrations against *E. coli*.

| $\mu\text{g/mL}$ | SET 1 | SET 2 | SET 3 | N Total | Mean     | SD       | SEM      | Median | % Inhibition |
|------------------|-------|-------|-------|---------|----------|----------|----------|--------|--------------|
| 0                | 1.319 | 1.311 | 1.298 | 3       | 1.309333 | 0.010599 | 0.006119 | 1.311  |              |
| 5                | 0.752 | 0.721 | 0.699 | 3       | 0.724    | 0.026627 | 0.015373 | 0.721  | 44.70468     |
| 10               | 0.712 | 0.698 | 0.711 | 3       | 0.707    | 0.00781  | 0.004509 | 0.711  | 46.00305     |
| 25               | 0.701 | 0.662 | 0.782 | 3       | 0.715    | 0.061213 | 0.035341 | 0.701  | 45.39206     |

|     |       |       |       |   |          |          |          |       |          |
|-----|-------|-------|-------|---|----------|----------|----------|-------|----------|
| 50  | 0.713 | 0.701 | 0.715 | 3 | 0.709667 | 0.007572 | 0.004372 | 0.713 | 45.79939 |
| 100 | 0.547 | 0.503 | 0.569 | 3 | 0.539667 | 0.033606 | 0.019402 | 0.547 | 58.7831  |
| 250 | 0.229 | 0.24  | 0.215 | 3 | 0.228    | 0.01253  | 0.007234 | 0.229 | 82.58656 |
| 500 | 0.255 | 0.279 | 0.198 | 3 | 0.244    | 0.041605 | 0.024021 | 0.255 | 81.36456 |

**Table S9.** Inhibition activity of **4bc** at different concentrations against *E. coli*.

| $\mu\text{g/mL}$ | SET 1 | SET 2 | SET 3 | N Total | Mean     | SD       | SEM      | Median | % Inhibition |
|------------------|-------|-------|-------|---------|----------|----------|----------|--------|--------------|
| 0                | 1.123 | 1.099 | 1.211 | 3       | 1.144333 | 0.058969 | 0.034046 | 1.123  |              |
| 5                | 1.259 | 1.063 | 1.011 | 3       | 1.111    | 0.130782 | 0.075507 | 1.063  | 2.912904     |
| 10               | 1.09  | 1.18  | 1.066 | 3       | 1.112    | 0.0601   | 0.034699 | 1.09   | 2.825517     |
| 25               | 1.15  | 1.17  | 0.981 | 3       | 1.100333 | 0.103828 | 0.059945 | 1.15   | 3.845033     |
| 50               | 0.632 | 0.597 | 0.648 | 3       | 0.625667 | 0.026083 | 0.015059 | 0.632  | 45.32479     |
| 100              | 0.456 | 0.481 | 0.438 | 3       | 0.458333 | 0.021595 | 0.012468 | 0.456  | 59.94757     |
| 250              | 0.239 | 0.245 | 0.218 | 3       | 0.234    | 0.014177 | 0.008185 | 0.239  | 79.55141     |
| 500              | 0.213 | 0.195 | 0.219 | 3       | 0.209    | 0.01249  | 0.007211 | 0.213  | 81.73609     |

**Table S10.** Inhibition activity of **4ca** at different concentrations against *E. coli*.

| $\mu\text{g/mL}$ | SET 1 | SET 2 | SET 3 | N Total | Mean     | SD       | SEM      | Median | % Inhibition |
|------------------|-------|-------|-------|---------|----------|----------|----------|--------|--------------|
| 0                | 1.692 | 1.573 | 1.641 | 3       | 1.635333 | 0.059702 | 0.034469 | 1.641  |              |
| 5                | 1.366 | 1.311 | 1.321 | 3       | 1.332667 | 0.029297 | 0.016915 | 1.321  | 18.50795     |
| 10               | 1.366 | 1.291 | 1.309 | 3       | 1.322    | 0.039154 | 0.022605 | 1.309  | 19.16021     |
| 25               | 0.746 | 0.771 | 0.697 | 3       | 0.738    | 0.037643 | 0.021733 | 0.746  | 54.87159     |
| 50               | 0.526 | 0.486 | 0.491 | 3       | 0.501    | 0.021794 | 0.012583 | 0.491  | 69.36404     |
| 100              | 0.243 | 0.221 | 0.219 | 3       | 0.227667 | 0.013317 | 0.007688 | 0.221  | 86.07827     |
| 250              | 0.232 | 0.188 | 0.221 | 3       | 0.213667 | 0.022898 | 0.01322  | 0.221  | 86.93437     |
| 500              | 0.126 | 0.119 | 0.101 | 3       | 0.115333 | 0.012897 | 0.007446 | 0.119  | 92.94741     |

**Table S11.** Inhibition activity of **4cb** at different concentrations against *E. coli*.

| $\mu\text{g/mL}$ | SET 1 | SET 2 | SET 3 | N Total | Mean     | SD       | SEM      | Median | % Inhibition |
|------------------|-------|-------|-------|---------|----------|----------|----------|--------|--------------|
| 0                | 0.966 | 1.102 | 0.963 | 3       | 1.010333 | 0.0794   | 0.045842 | 0.966  |              |
| 5                | 1.051 | 0.993 | 0.876 | 3       | 0.973333 | 0.089142 | 0.051466 | 0.993  | 3.662158     |

|     |       |       |       |   |          |          |          |       |          |
|-----|-------|-------|-------|---|----------|----------|----------|-------|----------|
| 10  | 0.837 | 0.802 | 0.761 | 3 | 0.8      | 0.038039 | 0.021962 | 0.802 | 20.81821 |
| 25  | 0.71  | 0.814 | 0.692 | 3 | 0.738667 | 0.065858 | 0.038023 | 0.71  | 26.88882 |
| 50  | 0.479 | 0.411 | 0.399 | 3 | 0.429667 | 0.043143 | 0.024909 | 0.411 | 57.47278 |
| 100 | 0.379 | 0.316 | 0.365 | 3 | 0.353333 | 0.033081 | 0.019099 | 0.365 | 65.02804 |
| 250 | 0.241 | 0.197 | 0.232 | 3 | 0.223333 | 0.023245 | 0.013421 | 0.232 | 77.89508 |
| 500 | 0.136 | 0.121 | 0.116 | 3 | 0.124333 | 0.010408 | 0.006009 | 0.121 | 87.69383 |

**Table S12.** Inhibition activity of **4cd** at different concentrations against *E. coli*.

| $\mu\text{g/mL}$ | SET 1 | SET 2 | SET 3 | N Total | Mean     | SD       | SEM      | Median | % Inhibition |
|------------------|-------|-------|-------|---------|----------|----------|----------|--------|--------------|
| 0                | 0.999 | 1.011 | 1.021 | 3       | 1.010333 | 0.011015 | 0.00636  | 1.011  |              |
| 5                | 0.966 | 0.993 | 1.001 | 3       | 0.986667 | 0.018339 | 0.010588 | 0.993  | 2.342461     |
| 10               | 1.094 | 1.023 | 1.006 | 3       | 1.041    | 0.04668  | 0.026951 | 1.023  | -3.0353      |
| 25               | 0.838 | 0.912 | 0.814 | 3       | 0.854667 | 0.051082 | 0.029492 | 0.838  | 15.40746     |
| 50               | 0.694 | 0.721 | 0.619 | 3       | 0.678    | 0.052849 | 0.030512 | 0.694  | 32.89343     |
| 100              | 0.602 | 0.629 | 0.59  | 3       | 0.607    | 0.019975 | 0.011533 | 0.602  | 39.92082     |
| 250              | 0.492 | 0.414 | 0.503 | 3       | 0.469667 | 0.048521 | 0.028014 | 0.492  | 53.51369     |
| 500              | 0.226 | 0.217 | 0.228 | 3       | 0.223667 | 0.005859 | 0.003383 | 0.226  | 77.86209     |

**Table S13.** Inhibition activity of **4da** at different concentrations against *E. coli*.

| $\mu\text{g/mL}$ | SET 1 | SET 2 | SET 3 | N Total | Mean     | SD       | SEM      | Median | % Inhibition |
|------------------|-------|-------|-------|---------|----------|----------|----------|--------|--------------|
| 0                | 1.088 | 1.076 | 1.081 | 3       | 1.081667 | 0.006028 | 0.00348  | 1.081  |              |
| 5                | 1.034 | 1.021 | 1.038 | 3       | 1.031    | 0.008888 | 0.005132 | 1.034  | 4.684129     |
| 10               | 0.729 | 0.729 | 0.816 | 3       | 0.758    | 0.050229 | 0.029    | 0.729  | 29.92296     |
| 25               | 0.481 | 0.526 | 0.478 | 3       | 0.495    | 0.026889 | 0.015524 | 0.481  | 54.23729     |
| 50               | 0.472 | 0.451 | 0.493 | 3       | 0.472    | 0.021    | 0.012124 | 0.472  | 56.36364     |
| 100              | 0.675 | 0.626 | 0.617 | 3       | 0.639333 | 0.031214 | 0.018022 | 0.626  | 40.89368     |
| 250              | 0.521 | 0.534 | 0.519 | 3       | 0.524667 | 0.008145 | 0.004702 | 0.521  | 51.49461     |
| 500              | 0.431 | 0.426 | 0.39  | 3       | 0.415667 | 0.022368 | 0.012914 | 0.426  | 61.57165     |

**Table S14.** Inhibition activity of **4db** at different concentrations against *E. coli*.

| $\mu\text{g/mL}$ | SET 1 | SET 2 | SET 3 | N Total | Mean     | SD       | SEM      | Median | % Inhibition |
|------------------|-------|-------|-------|---------|----------|----------|----------|--------|--------------|
| 0                | 1.028 | 1.016 | 1.071 | 3       | 1.038333 | 0.028919 | 0.016697 | 1.028  |              |
| 5                | 0.949 | 0.921 | 0.938 | 3       | 0.936    | 0.014107 | 0.008145 | 0.938  | 9.855538     |
| 10               | 0.977 | 0.987 | 0.963 | 3       | 0.975667 | 0.012055 | 0.00696  | 0.977  | 6.035313     |
| 25               | 0.913 | 0.902 | 0.918 | 3       | 0.911    | 0.008185 | 0.004726 | 0.913  | 12.26324     |
| 50               | 1.048 | 1.021 | 0.994 | 3       | 1.021    | 0.027    | 0.015588 | 1.021  | 1.669342     |
| 100              | 0.746 | 0.802 | 0.721 | 3       | 0.756333 | 0.041477 | 0.023947 | 0.746  | 27.15891     |
| 250              | 0.456 | 0.431 | 0.429 | 3       | 0.438667 | 0.015044 | 0.008686 | 0.431  | 57.75281     |
| 500              | 0.568 | 0.514 | 0.498 | 3       | 0.526667 | 0.036679 | 0.021177 | 0.514  | 49.27769     |

**Table S15.** The  $\text{IC}_{50}$  value of all the tested compounds against *E. coli* and *B. cereus*.

| Test Compounds | Structure                                                                           | <i>E. Coli</i> $\text{IC}_{50}$ ( $\mu\text{g/mL}$ ) | <i>B. Cereus</i> $\text{IC}_{50}$ ( $\mu\text{g/mL}$ ) |
|----------------|-------------------------------------------------------------------------------------|------------------------------------------------------|--------------------------------------------------------|
| <b>4aa</b>     | 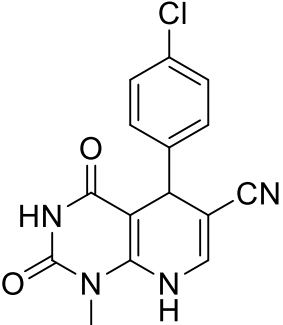 | 183.28                                               | 199.22                                                 |
| <b>4ab</b>     |  | 153.60                                               | 1124.65                                                |

|     |                                                                                     |        |         |
|-----|-------------------------------------------------------------------------------------|--------|---------|
| 4ac | 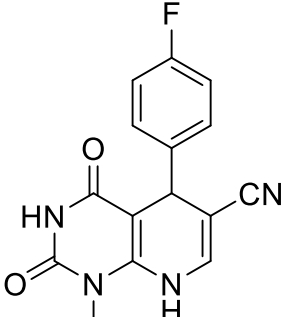   | 179.82 | 1049.77 |
| 4ad |    | 145.98 | 4479.19 |
| 4ah |   | 170.34 | 3166.91 |
| 4ba |  | 85.73  | 1623.75 |

|            |                                                                                     |        |         |
|------------|-------------------------------------------------------------------------------------|--------|---------|
| <b>4bb</b> | 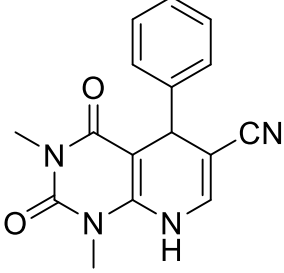   | 42.57  | 3595.85 |
| <b>4bc</b> |    | 199.86 | 3330.45 |
| <b>4ca</b> |  | 43.64  | 2468.93 |

|     |                                                                                     |        |         |
|-----|-------------------------------------------------------------------------------------|--------|---------|
| 4cb | 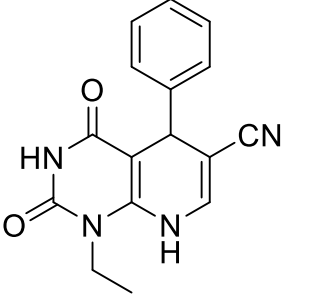   | 145    | 2352.75 |
| 4cd |    | 260.96 | 3984.29 |
| 4da |  | 254.31 | 589.85  |

|                                                  |                                                                                     |        |         |
|--------------------------------------------------|-------------------------------------------------------------------------------------|--------|---------|
| 4db                                              | 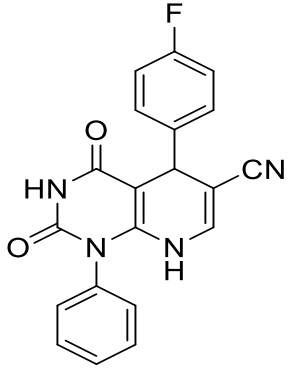   | 187.84 | 1789.42 |
| <b>Reported example</b><br>Ziarani et al. (2014) |    | 512.00 | NA      |
| <b>Reported example</b><br>Ziarani et al. (2014) |  | 512.00 | NA      |
| <b>Ampicillin</b>                                | Known drug                                                                          | 34.96  | 267.24  |

### Pictures of Antibacterial Study

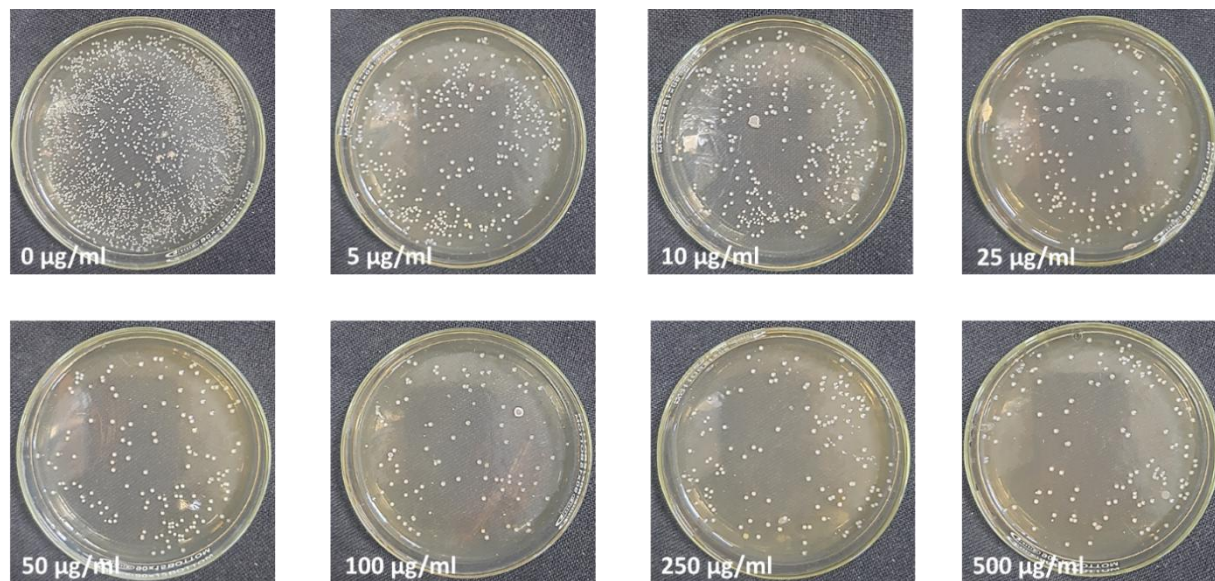

**Figure S13.** Antibacterial activity against *E. coli* using different concentrations of **4aa** (a) 0, (b) 5, (c) 10, (d) 25, (e) 50, (f) 100 (g) 250 (h) 500 µg/mL.

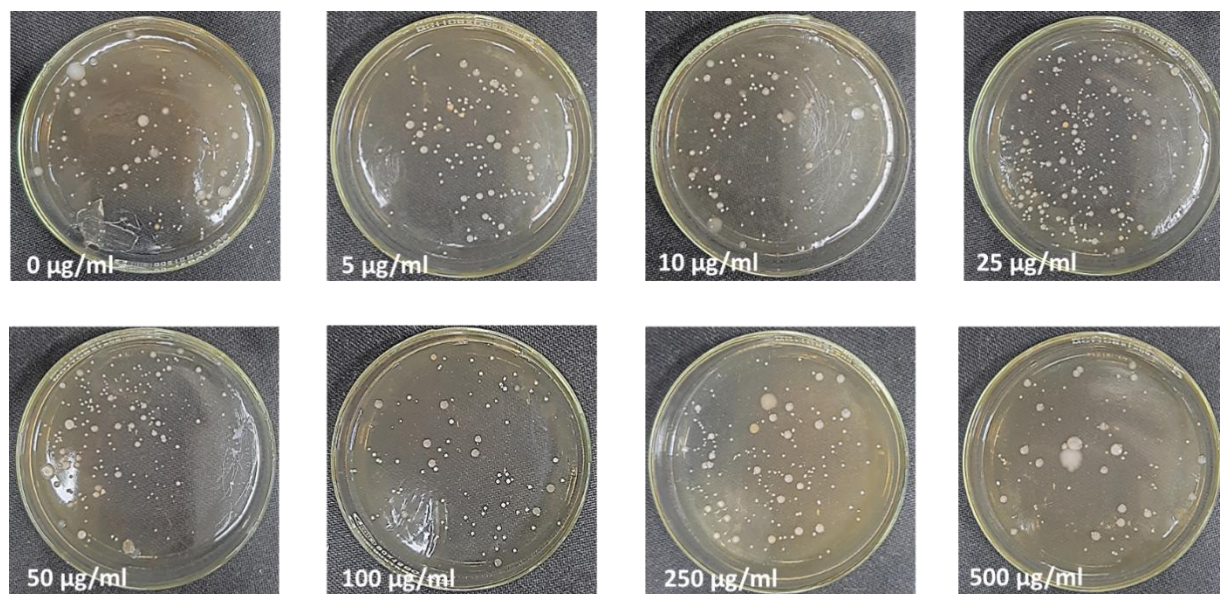

**Figure S14.** Antibacterial activity against *B. cereus* using different concentrations of **4aa** (a) 0, (b) 5, (c) 10, (d) 25, (e) 50, (f) 100 (g) 250 (h) 500 µg/mL.

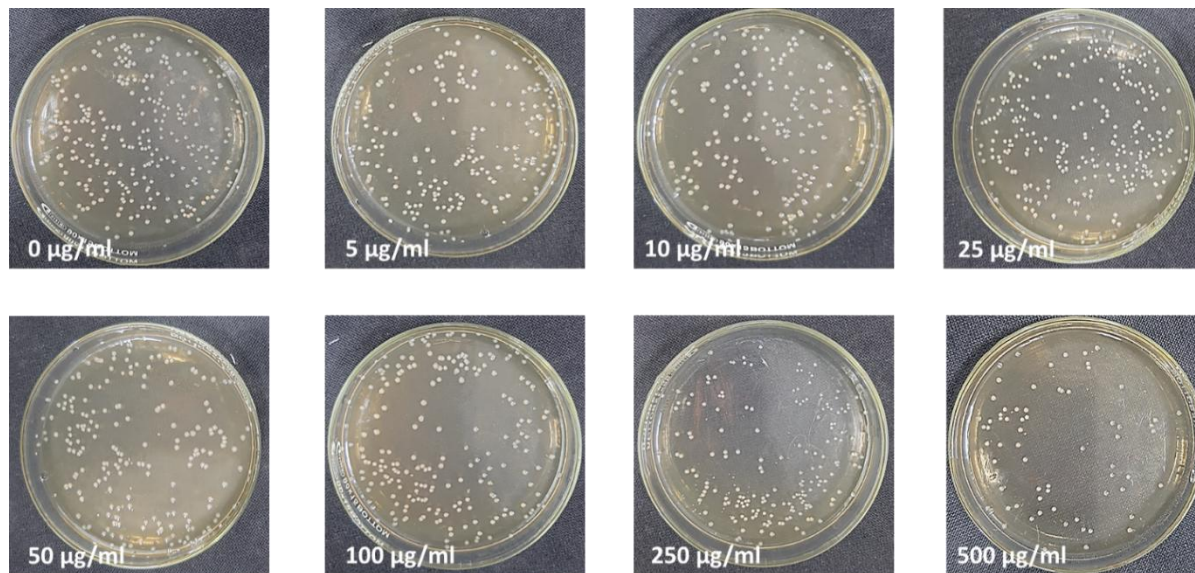

**Figure S15.** Antibacterial activity against *E. coli* using different concentrations of **4ab** (a) 0, (b) 5, (c) 10, (d) 25, (e) 50, (f) 100 (g) 250 (h) 500 µg/mL.

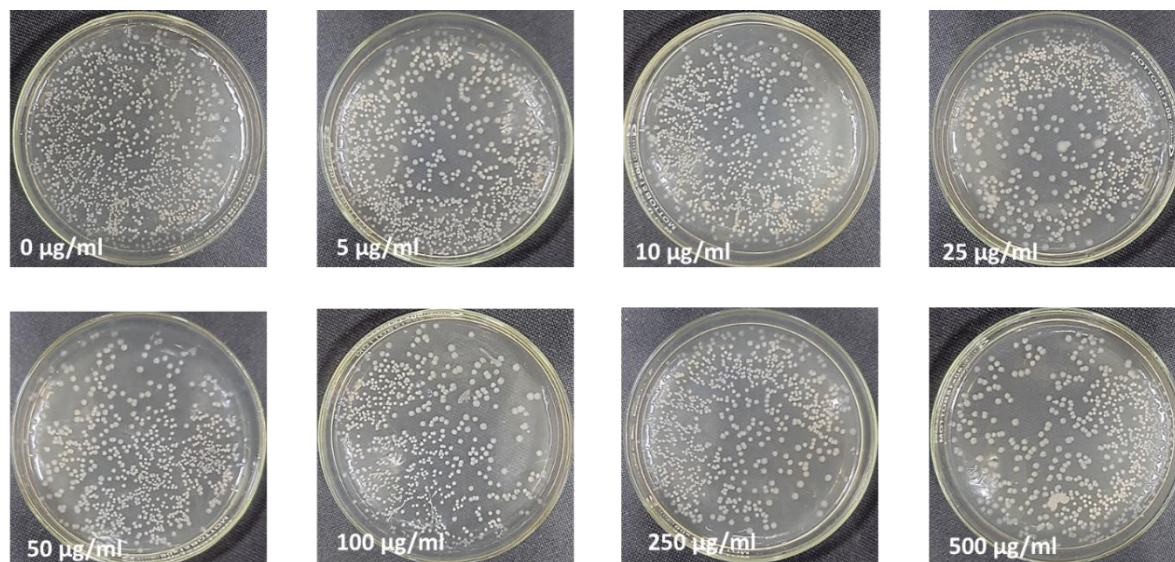

**Figure S16.** Antibacterial activity against *B. cereus* using different concentrations of **4ab** (a) 0, (b) 5, (c) 10, (d) 25, (e) 50, (f) 100 (g) 250 (h) 500 µg/mL.

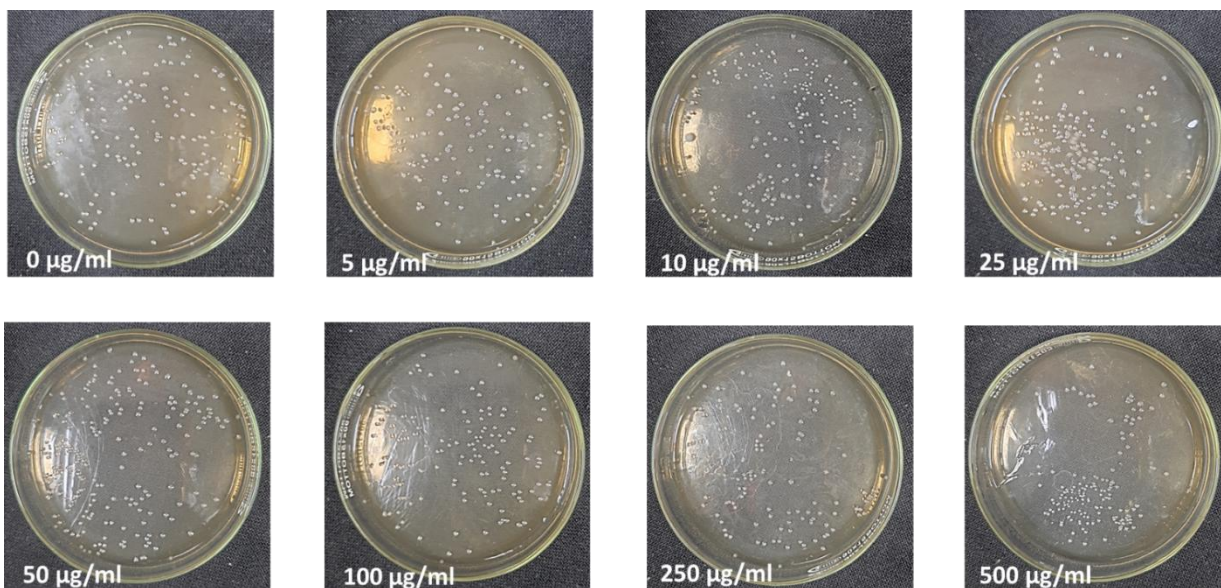

**Figure S17.** Antibacterial activity against *E. coli* using different concentrations of **4ad** (a) 0, (b) 5, (c) 10, (d) 25, (e) 50, (f) 100 (g) 250 (h) 500 µg/mL.

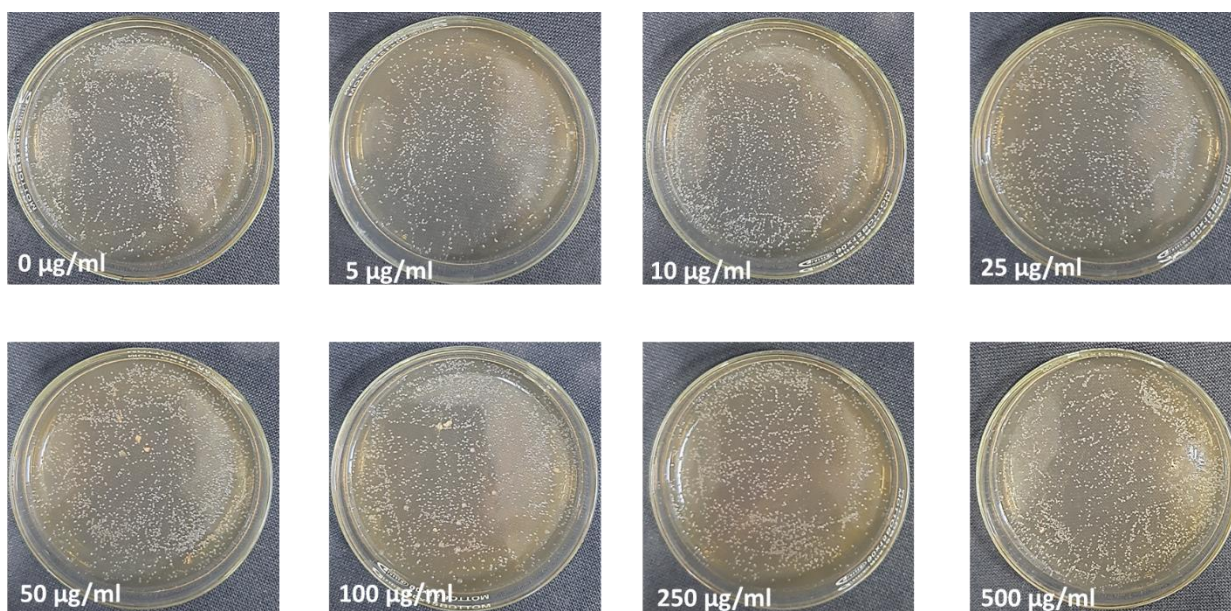

**Figure S18.** Antibacterial activity against *B. cereus* using different concentrations of **4ad** (a) 0, (b) 5, (c) 10, (d) 25, (e) 50, (f) 100 (g) 250 (h) 500 µg/mL.

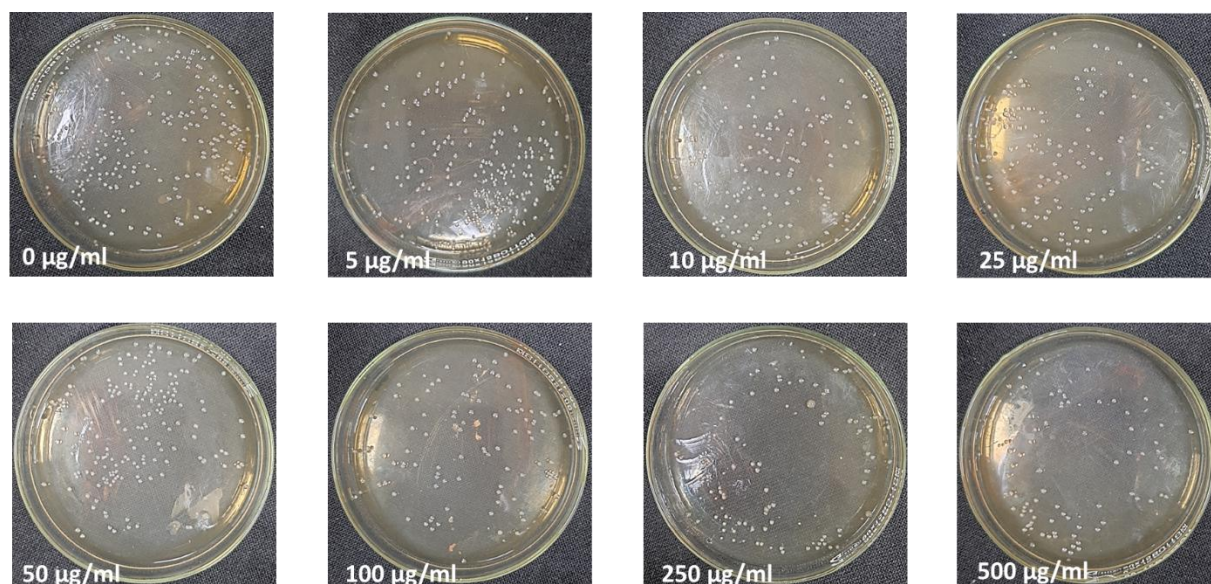

**Figure S19.** Antibacterial activity against *E. coli* using different concentrations of **4ac** (a) 0, (b) 5, (c) 10, (d) 25, (e) 50, (f) 100 (g) 250 (h) 500 µg/mL.

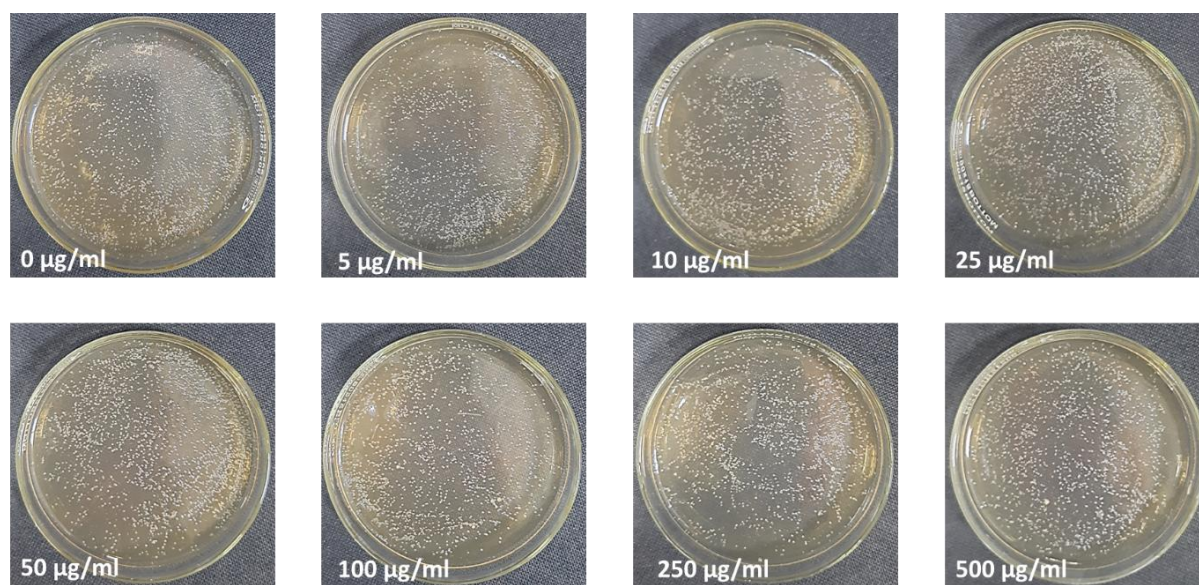

**Figure S20.** Antibacterial activity against *B. cereus* using different concentrations of **4ac** (a) 0, (b) 5, (c) 10, (d) 25, (e) 50, (f) 100 (g) 250 (h) 500 µg/mL.

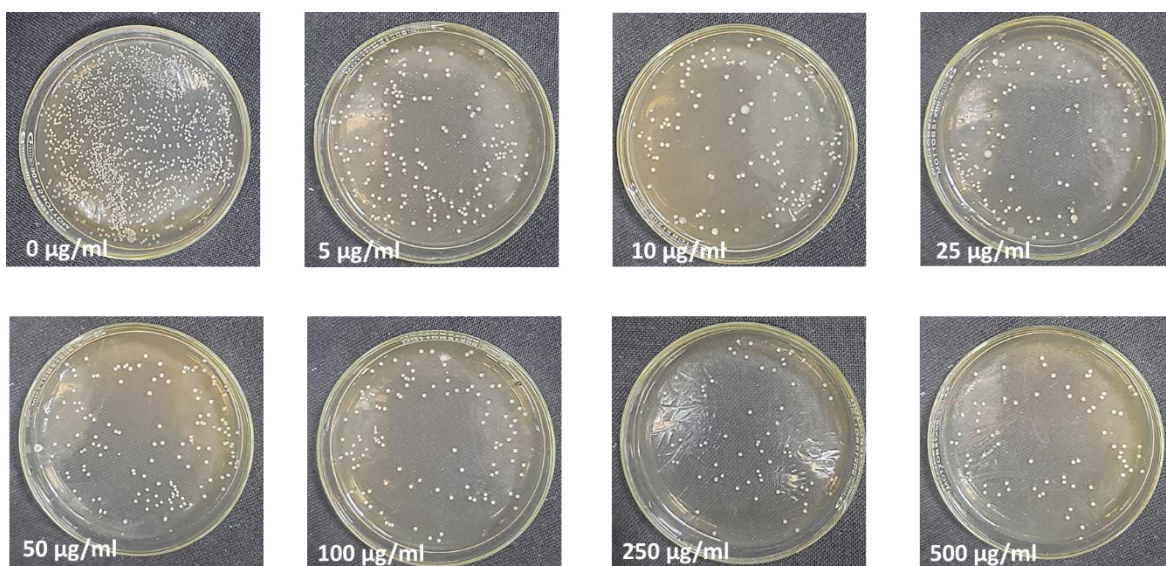

**Figure S21.** Antibacterial activity against *E. coli* using different concentrations of **4ah** (a) 0, (b) 5, (c) 10, (d) 25, (e) 50, (f) 100 (g) 250 (h) 500 µg/mL.

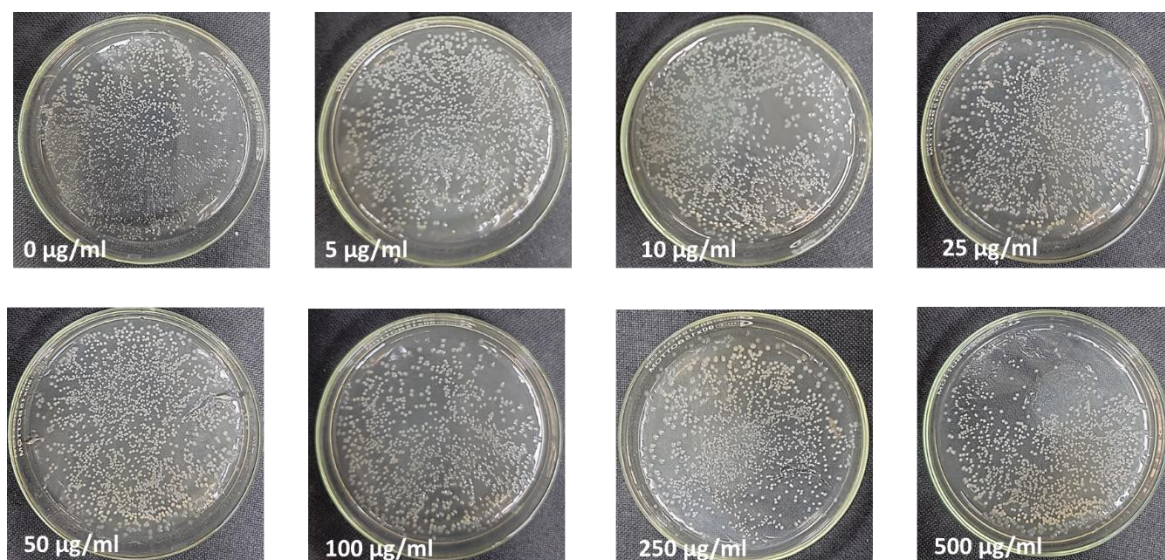

**Figure S22.** Antibacterial activity against *B. cereus* using different concentrations of **4ah** (a) 0, (b) 5, (c) 10, (d) 25, (e) 50, (f) 100 (g) 250 (h) 500 µg/mL.

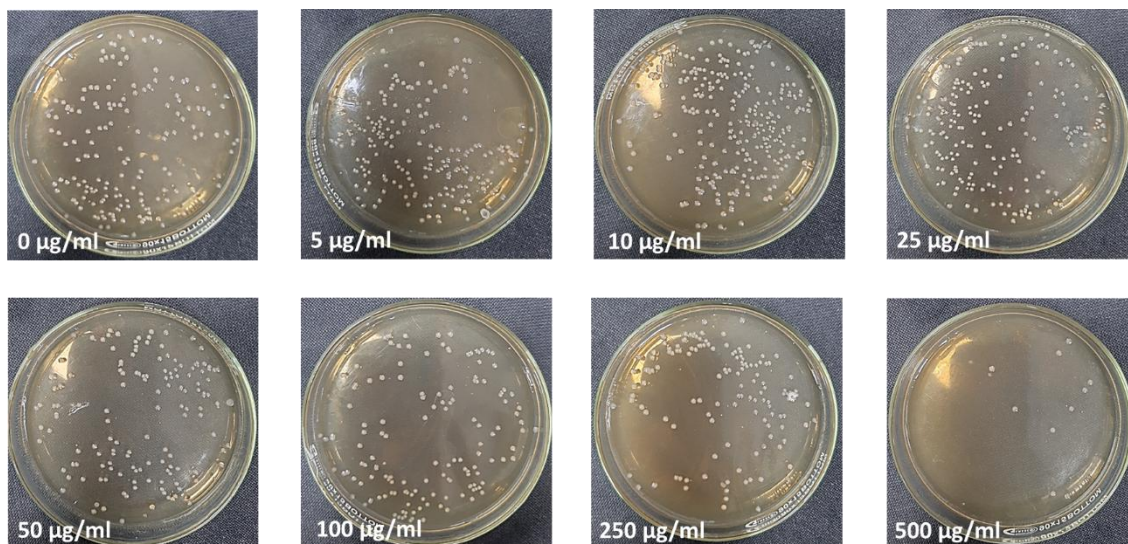

**Figure S23.** Antibacterial activity against *E. coli* using different concentrations of **4ba** (a) 0, (b) 5, (c) 10, (d) 25, (e) 50, (f) 100 (g) 250 (h) 500 µg/mL.

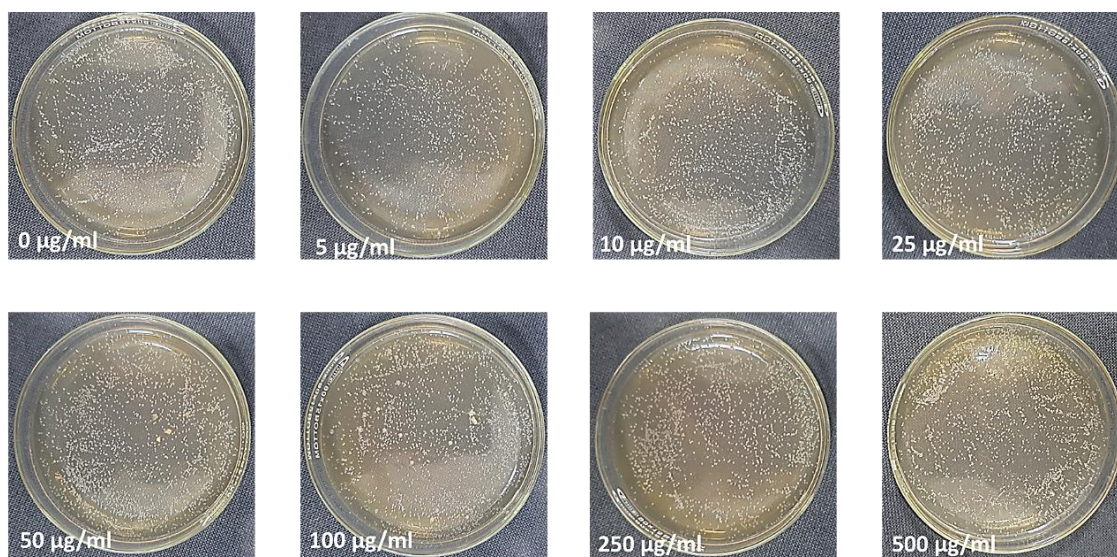

**Figure S24.** Antibacterial activity against *B. cereus* using different concentrations of **4ba** (a) 0, (b) 5, (c) 10, (d) 25, (e) 50, (f) 100 (g) 250 (h) 500 µg/mL.

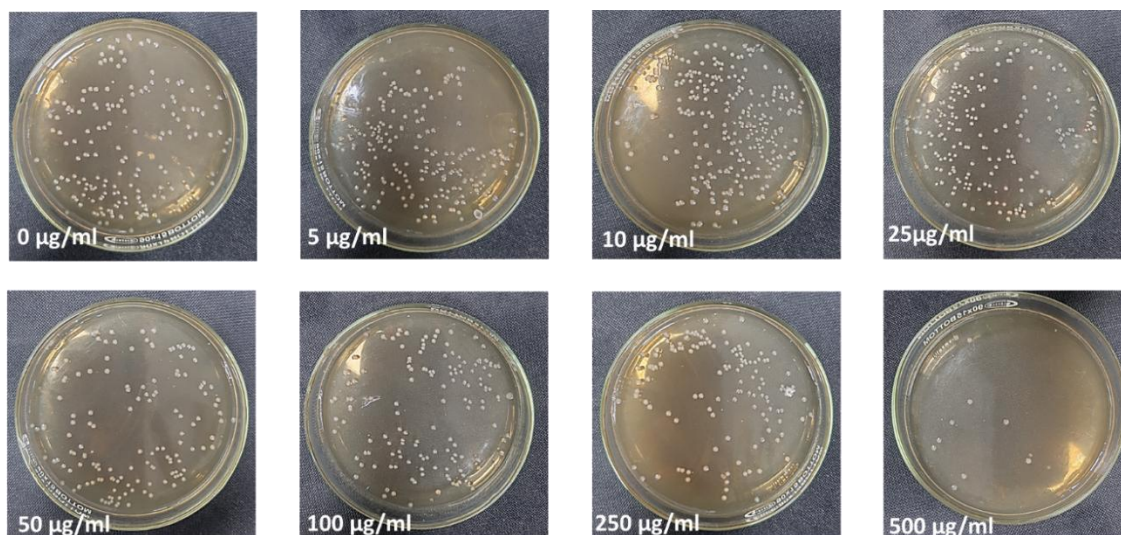

**Figure S25.** Antibacterial activity against *E. coli* using different concentrations of **4bb** (a) 0, (b) 5, (c) 10, (d) 25, (e) 50, (f) 100 (g) 250 (h) 500 µg/mL.

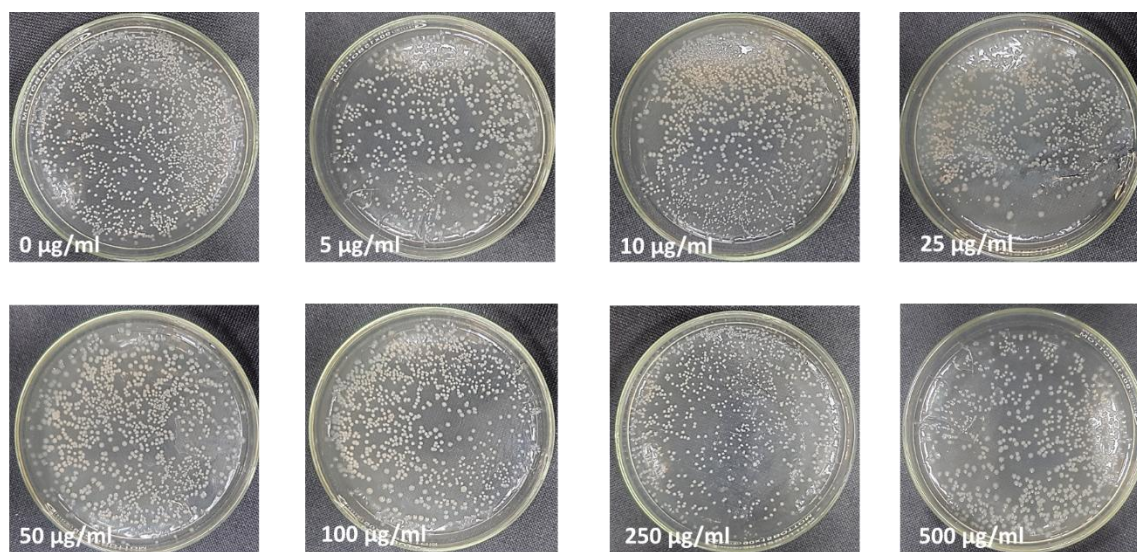

**Figure S26.** Antibacterial activity against *B. cereus* using different concentrations of **4bb** (a) 0, (b) 5, (c) 10, (d) 25, (e) 50, (f) 100 (g) 250 (h) 500 µg/mL.

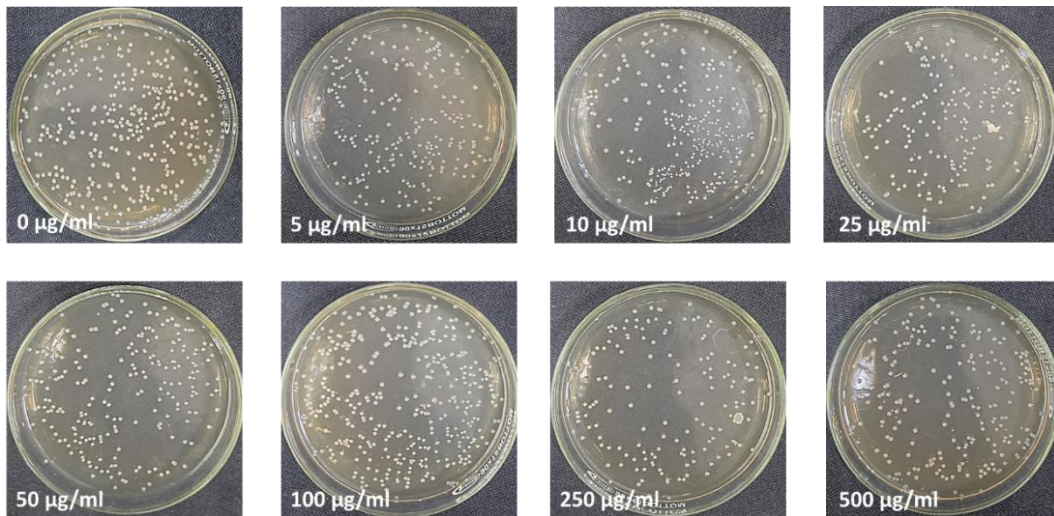

**Figure S27.** Antibacterial activity against *E. coli* using different concentrations of **4bc** (a) 0, (b) 5, (c) 10, (d) 25, (e) 50, (f) 100 (g) 250 (h) 500 µg/mL.

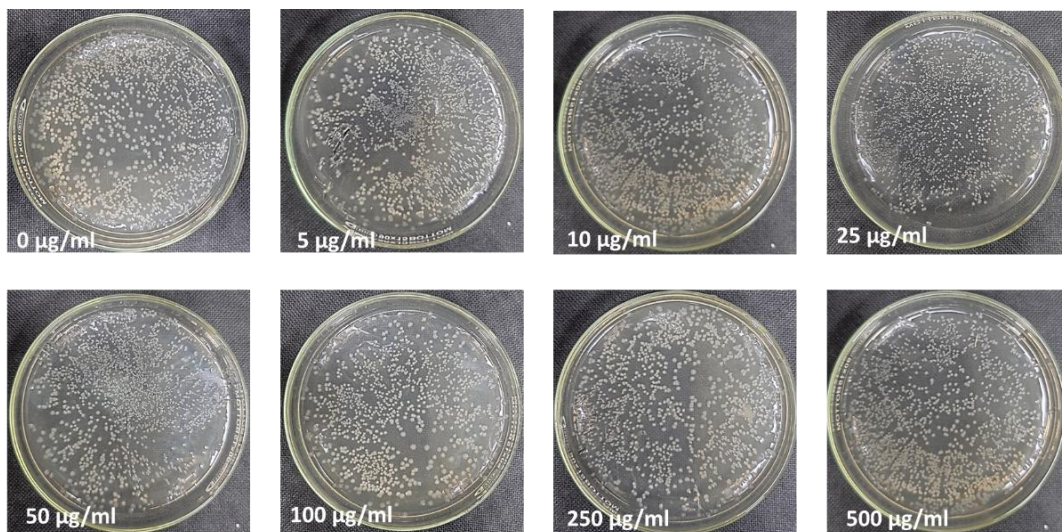

**Figure S28.** Antibacterial activity against *B. cereus* using different concentrations of **4bc** (a) 0, (b) 5, (c) 10, (d) 25, (e) 50, (f) 100 (g) 250 (h) 500 µg/mL.

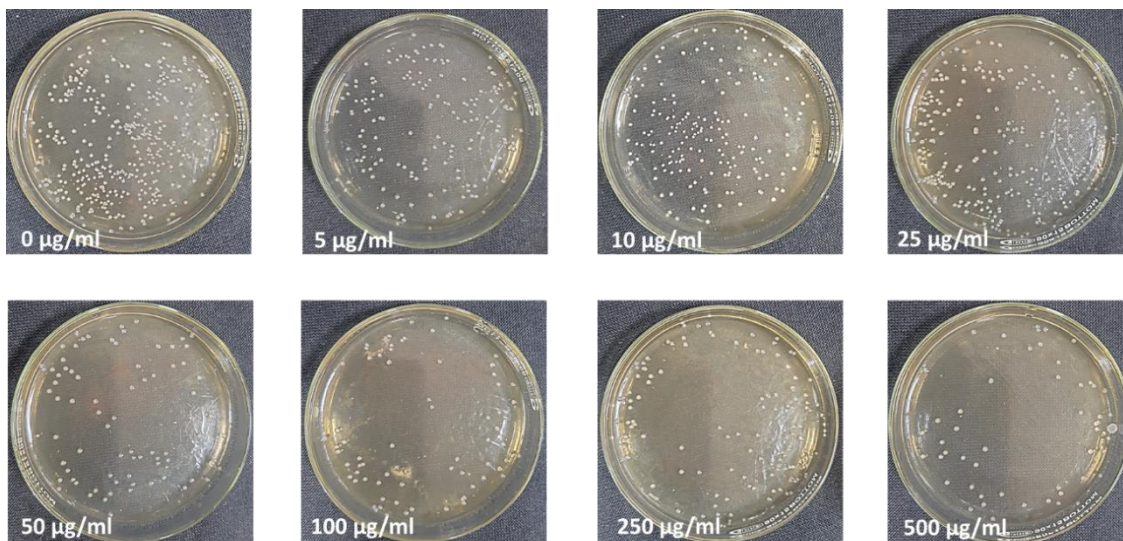

**Figure S29.** Antibacterial activity against *E. coli* using different concentrations of **4ca** (a) 0, (b) 5, (c) 10, (d) 25, (e) 50, (f) 100 (g) 250 (h) 500 µg/mL.

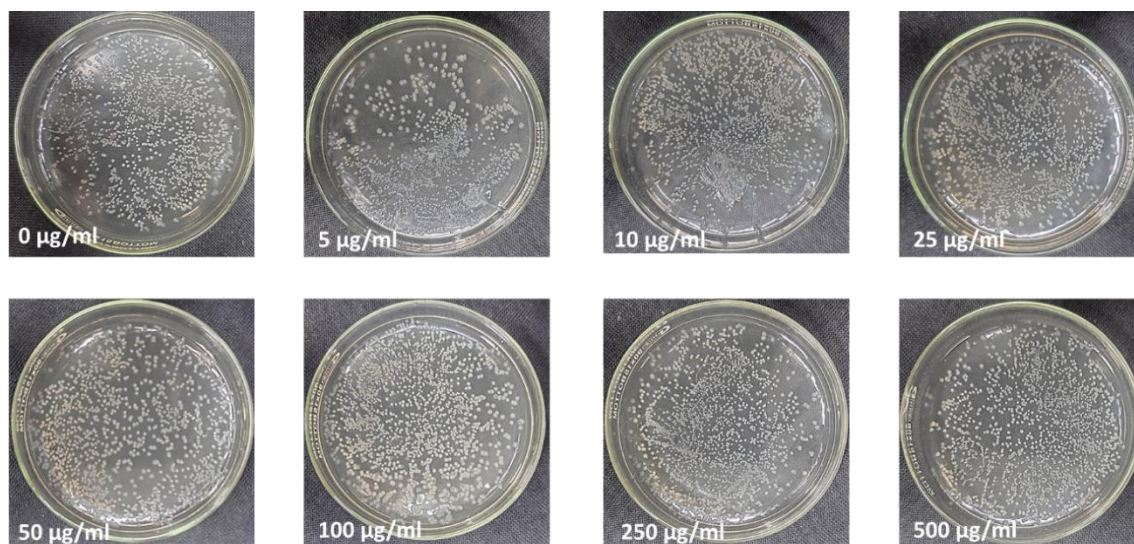

**Figure S30.** Antibacterial activity against *B. cereus* using different concentrations of **4ca** (a) 0, (b) 5, (c) 10, (d) 25, (e) 50, (f) 100 (g) 250 (h) 500 µg/mL.

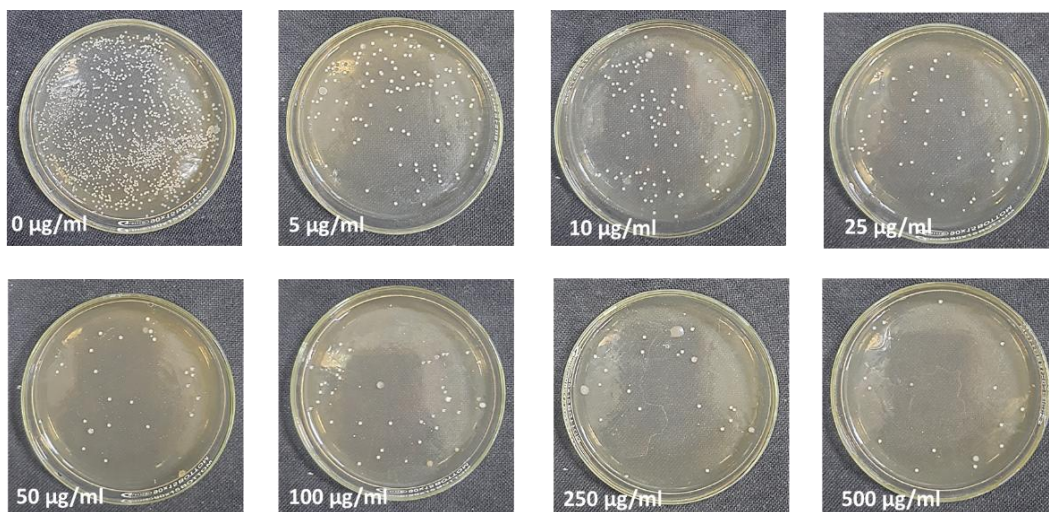

**Figure S31.** Antibacterial activity against *E. coli* using different concentrations of **4cb** (a) 0, (b) 5, (c) 10, (d) 25, (e) 50, (f) 100 (g) 250 (h) 500 µg/mL.

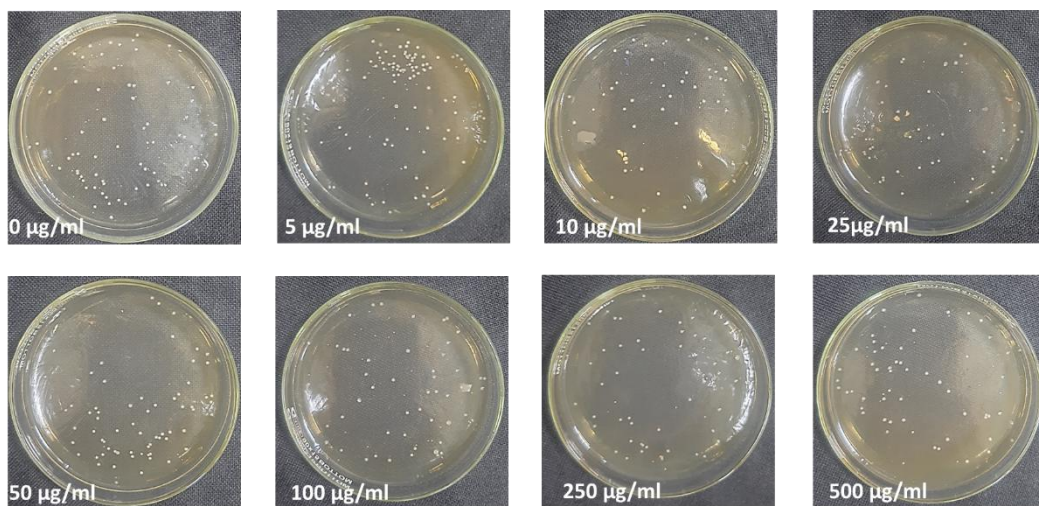

**Figure S32.** Antibacterial activity against *B. cereus* using different concentrations of **4cb** (a) 0, (b) 5, (c) 10, (d) 25, (e) 50, (f) 100 (g) 250 (h) 500 µg/mL.

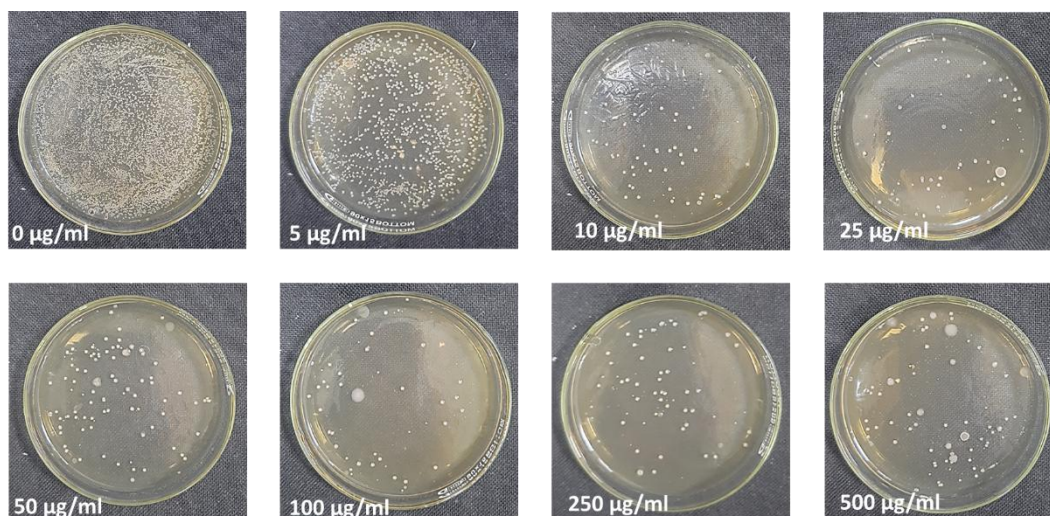

**Figure S33.** Antibacterial activity against *E. coli* using different concentrations of **4cd** (a) 0, (b) 5, (c) 10, (d) 25, (e) 50, (f) 100 (g) 250 (h) 500 µg/mL.

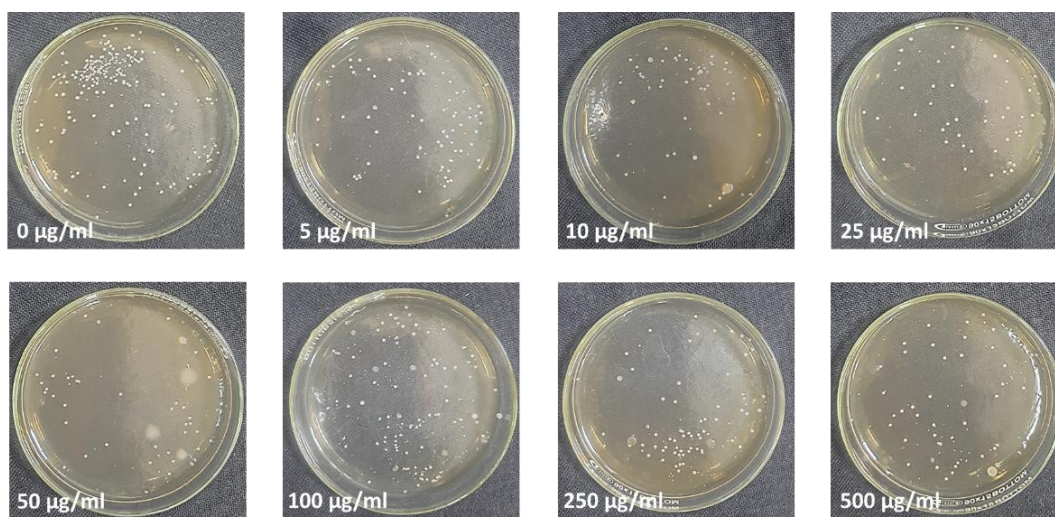

**Figure S34.** Antibacterial activity against *B. cereus* using different concentrations of **4cd** (a) 0, (b) 5, (c) 10, (d) 25, (e) 50, (f) 100 (g) 250 (h) 500 µg/mL.

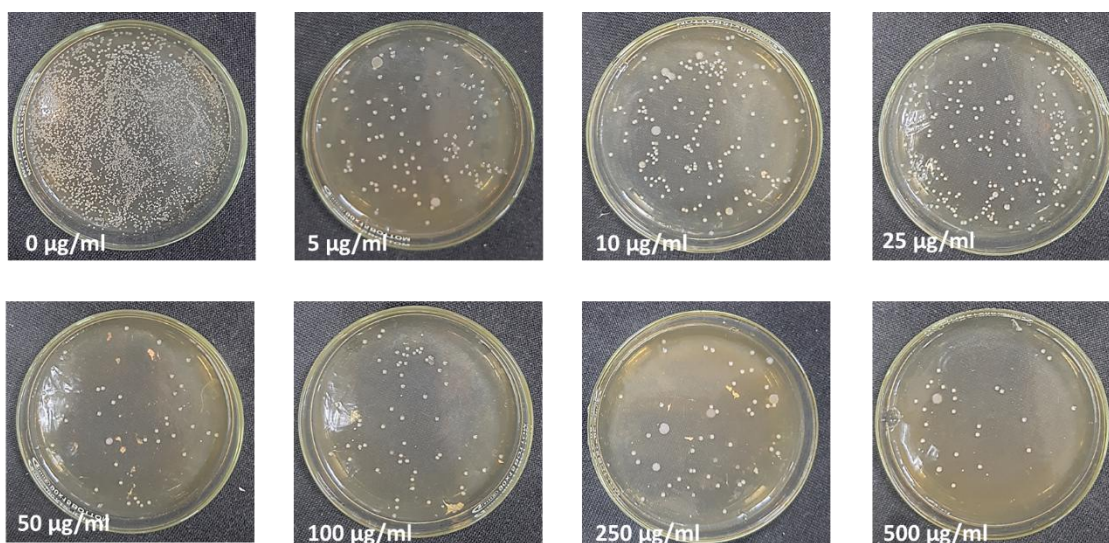

**Figure S35.** Antibacterial activity against *E. coli* using different concentrations of **4da** (a) 0, (b) 5, (c) 10, (d) 25, (e) 50, (f) 100 (g) 250 (h) 500 µg/mL.

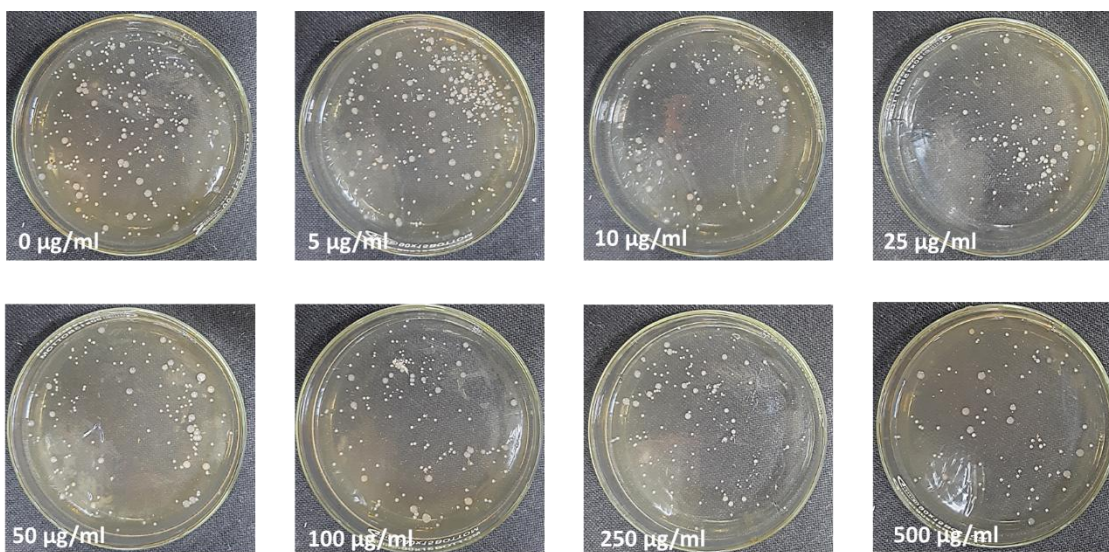

**Figure S36.** Antibacterial activity against *B. cereus* using different concentrations of **4da** (a) 0, (b) 5, (c) 10, (d) 25, (e) 50, (f) 100 (g) 250 (h) 500 µg/mL.

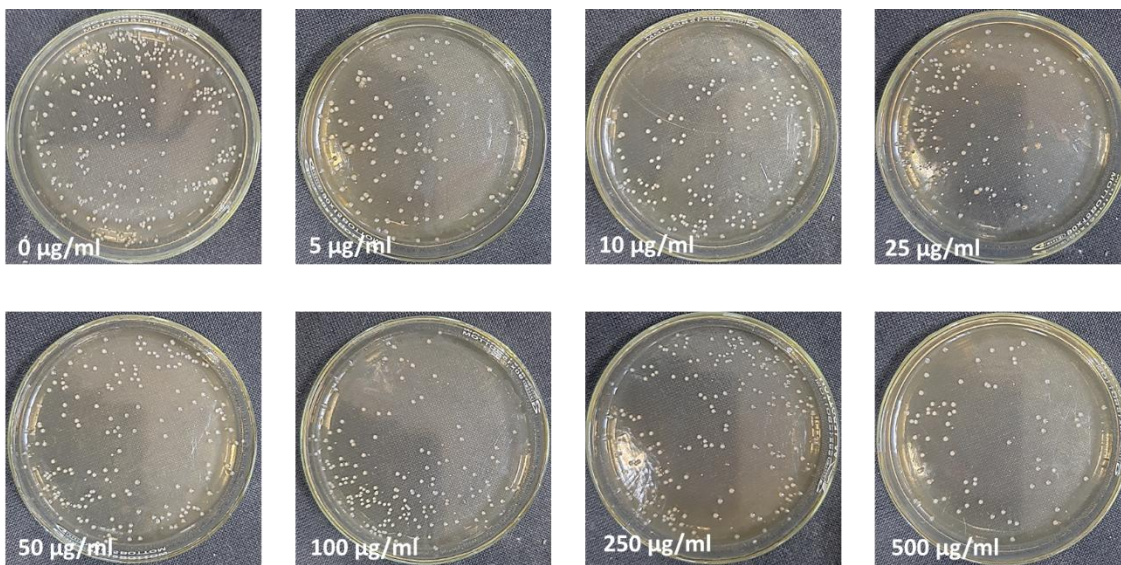

**Figure S37.** Antibacterial activity against *E. coli* using different concentrations of **4db** (a) 0, (b) 5, (c) 10, (d) 25, (e) 50, (f) 100 (g) 250 (h) 500 µg/mL.

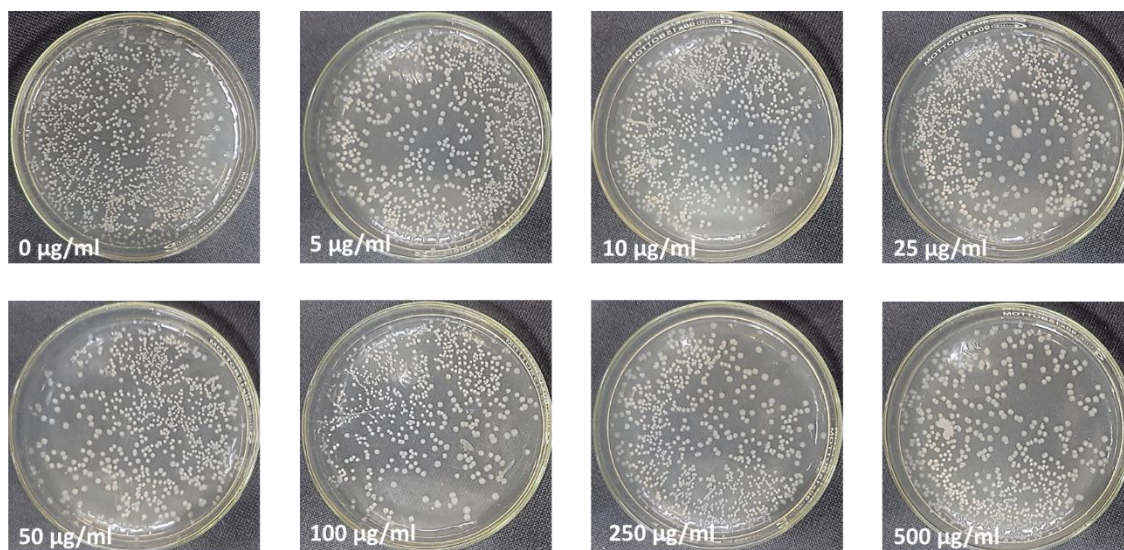

**Figure S38.** Antibacterial activity against *B. cereus* using different concentrations of **4db** (a) 0, (b) 5, (c) 10, (d) 25, (e) 50, (f) 100 (g) 250 (h) 500 µg/mL.

## 15. References

1. N. S. Freeman, C. E. Moore, L. M. Wilhelmsson, Y. Tor, *J. Org. Chem.* 2016, **81**, 4530-4539.
2. A. J. Thakur, S. Das, A. K. Phukan *J. Mol. Struct.* 2009, **929**, 134-140.
3. V. Papesch, E. F. Schroeder, *J. Org. Chem.* 1951, **16**, 1879-1890.
4. K. Dzieszkowski, I. Barańska, Z. Rafiński, *J. Org. Chem.* 2020, **85**, 6645-6662.
5. S. Naskar, D. Kowalczyk, S. Mal, S. Das, D. Mandal, P. Kumar, D. Ziegenbalg, *D. React. Chem. Eng.* 2023, **8**, 2211-2222.

## 16. Copies of NMR Spectra

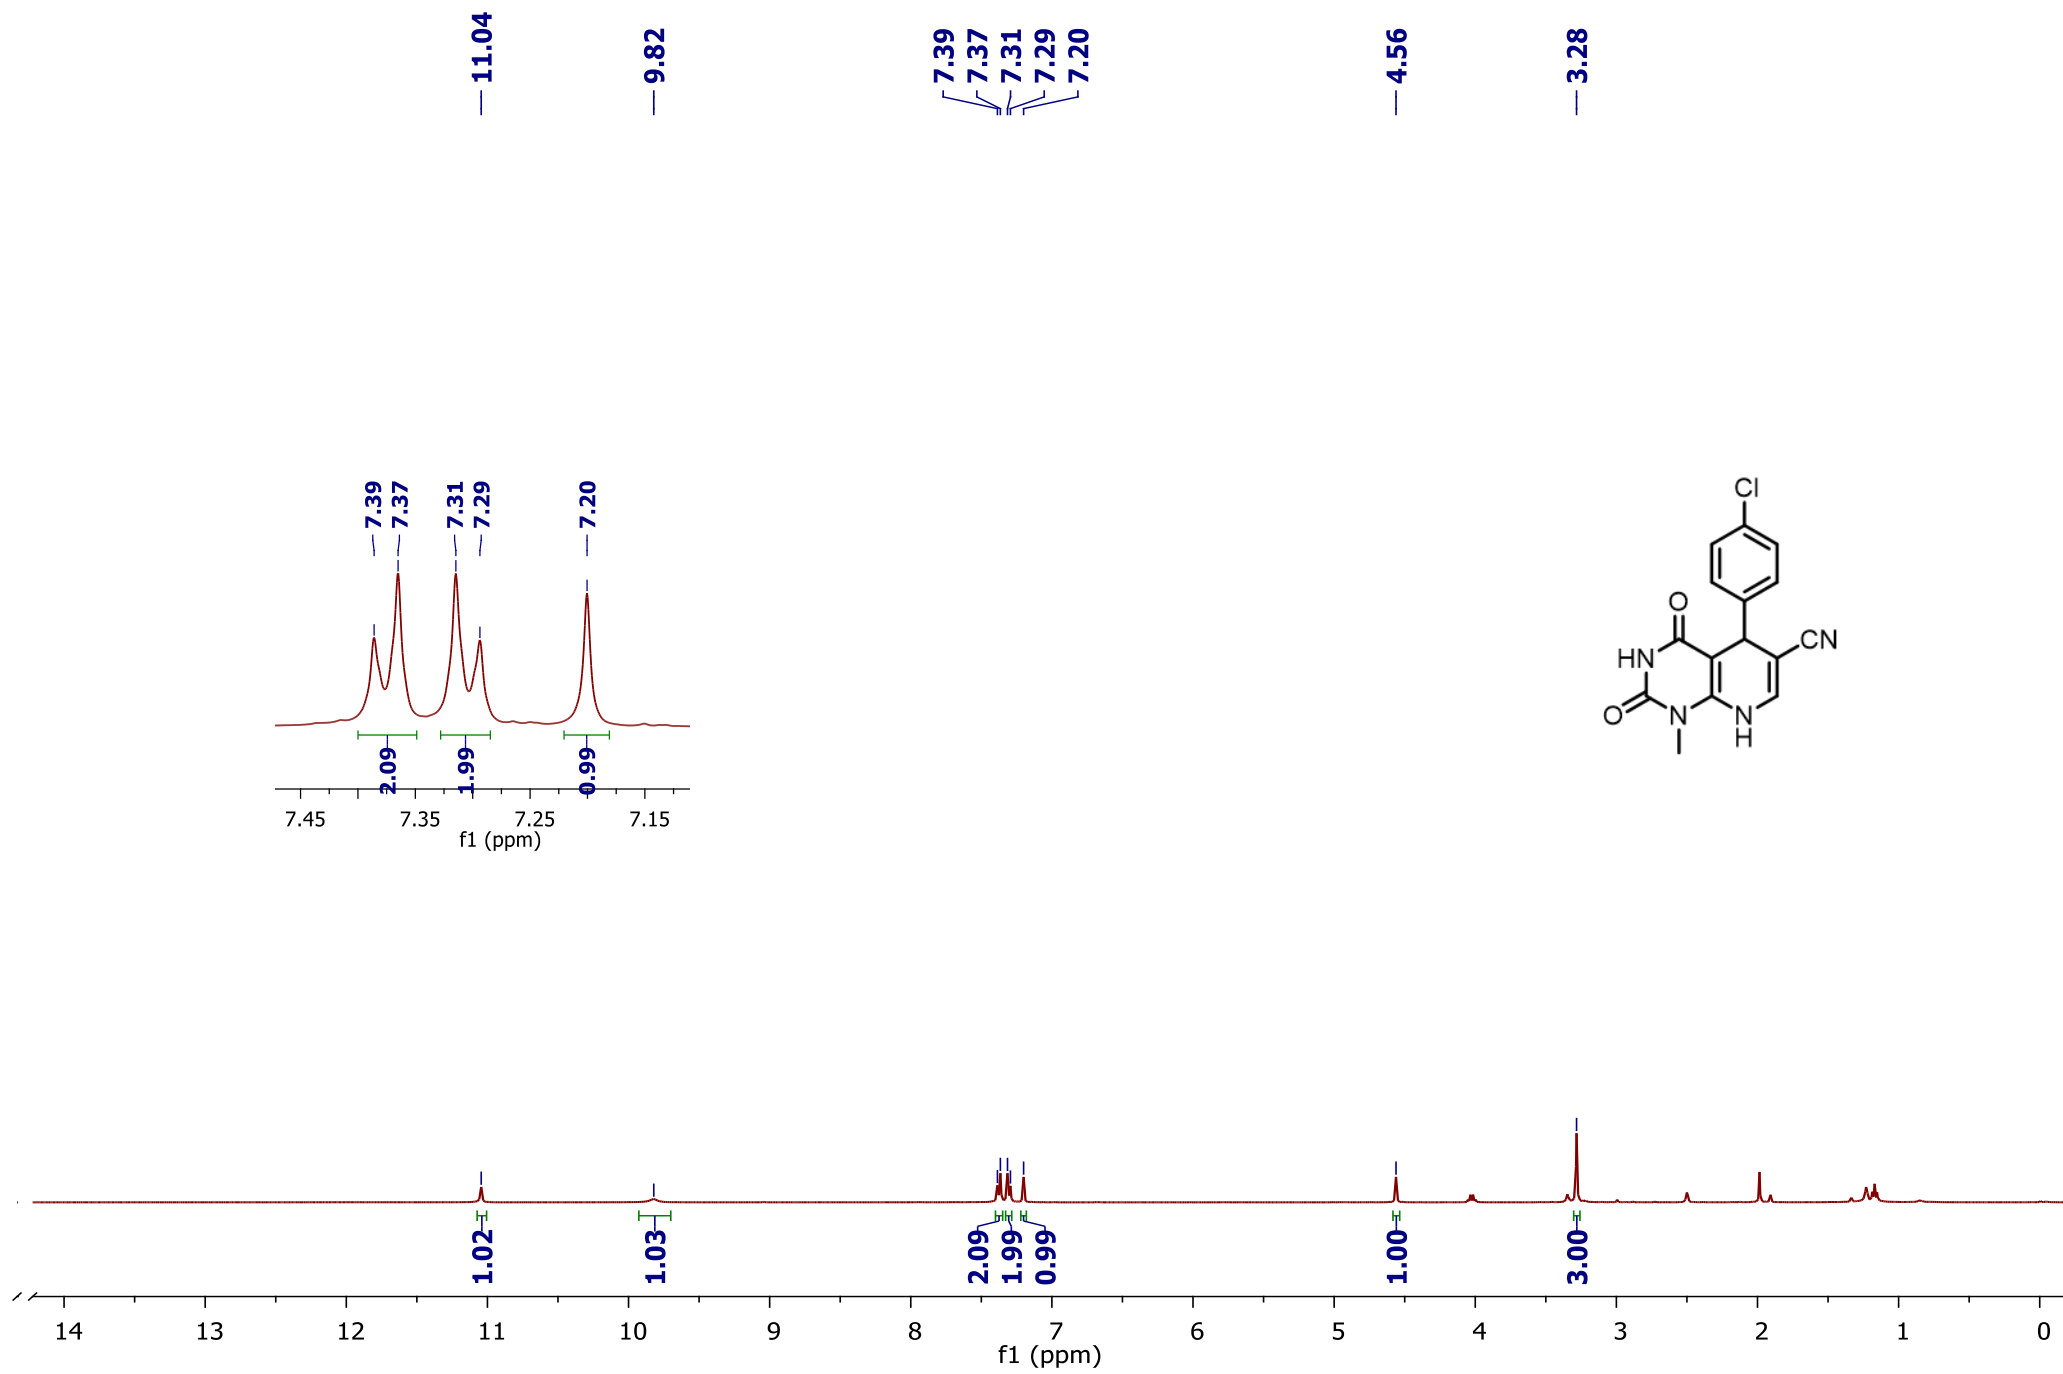

Figure S39. <sup>1</sup>H-NMR (DMSO-d<sub>6</sub>) spectra of compound 4aa.

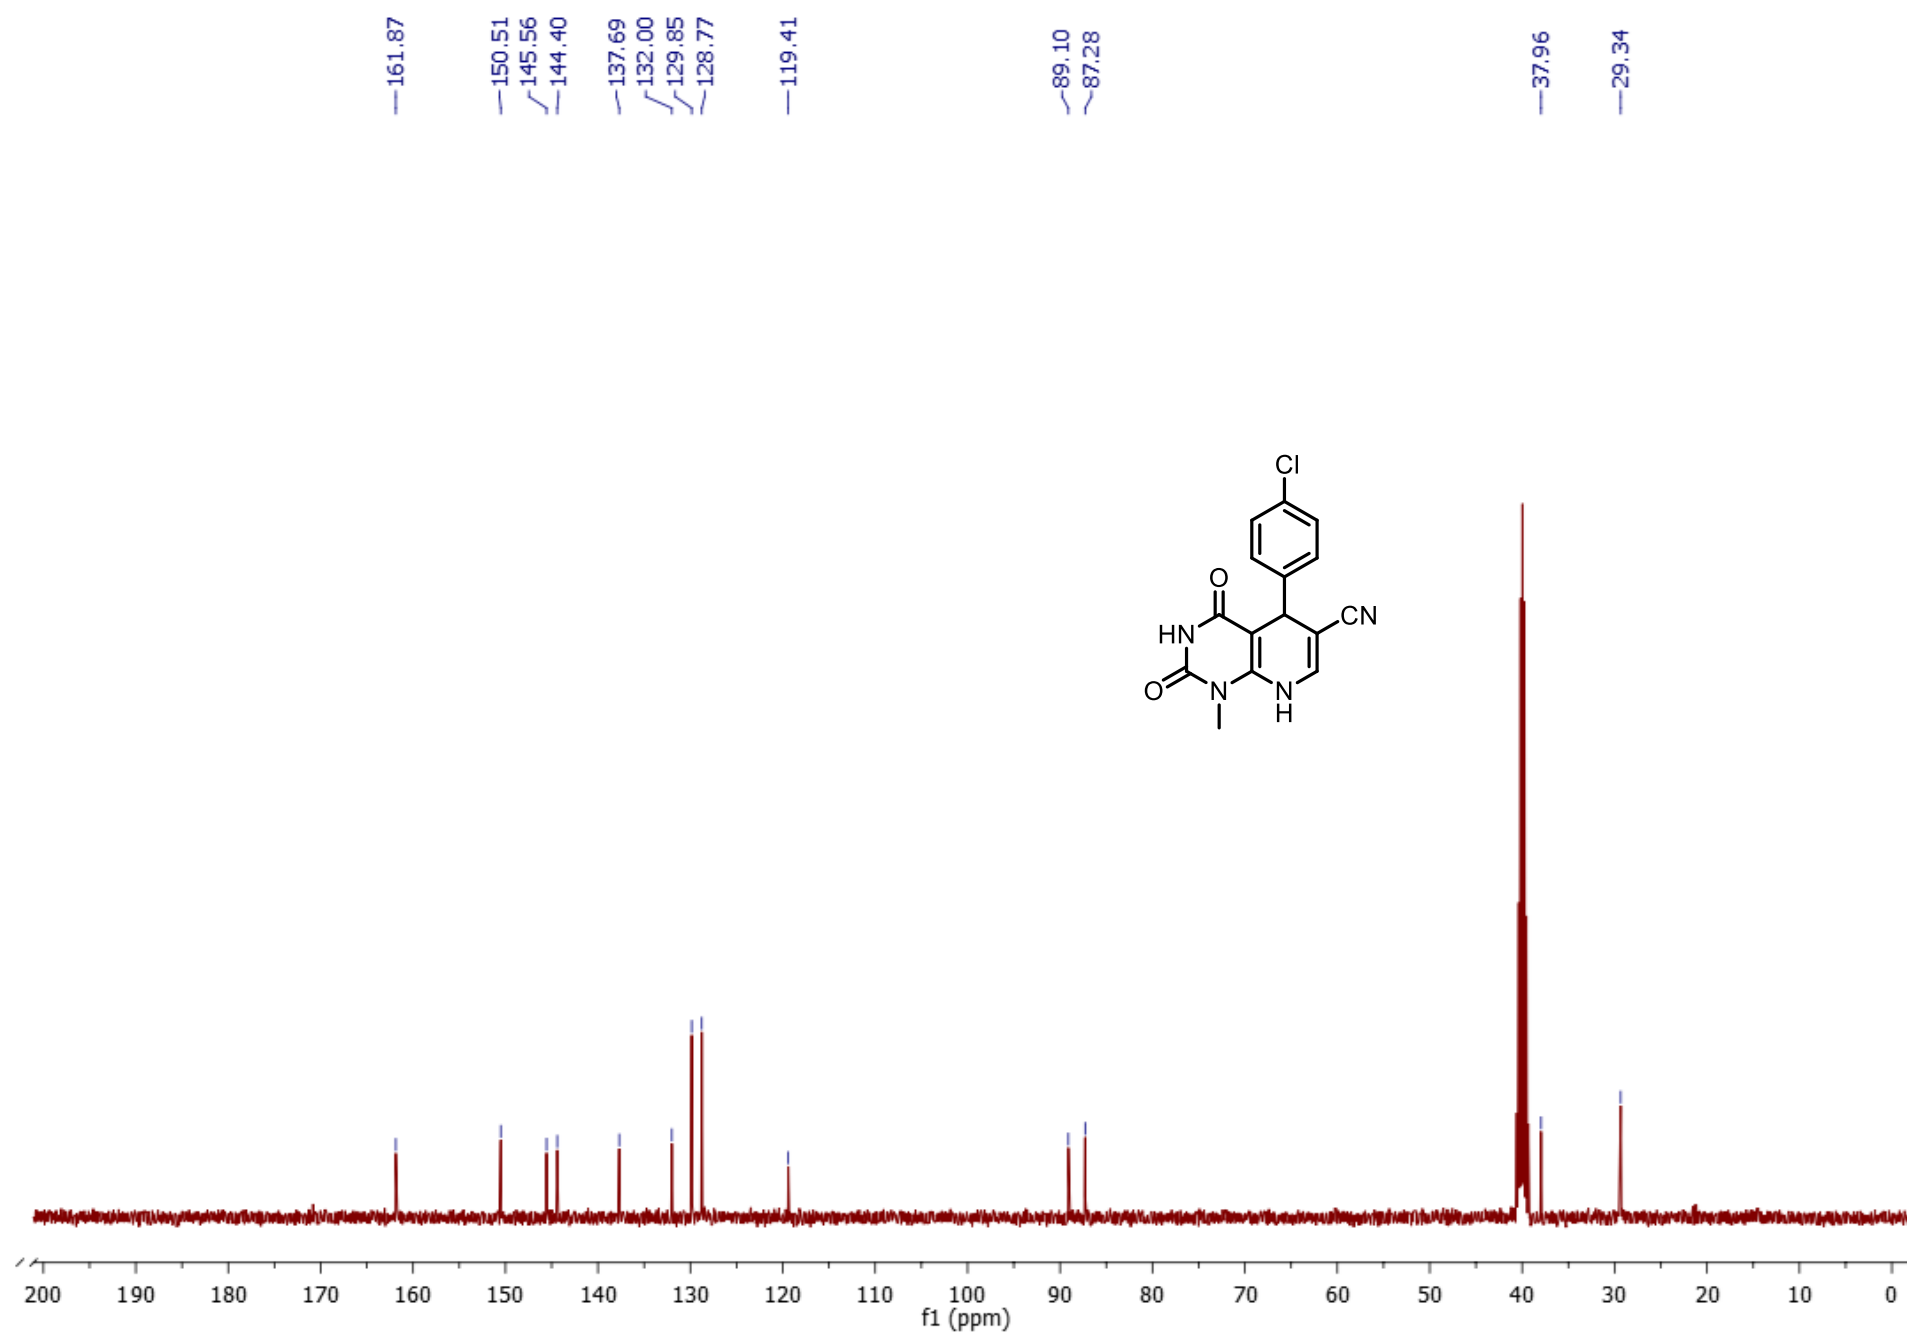

Figure S40. <sup>13</sup>C-NMR (DMSO-d<sub>6</sub>) spectra of compound 4aa.

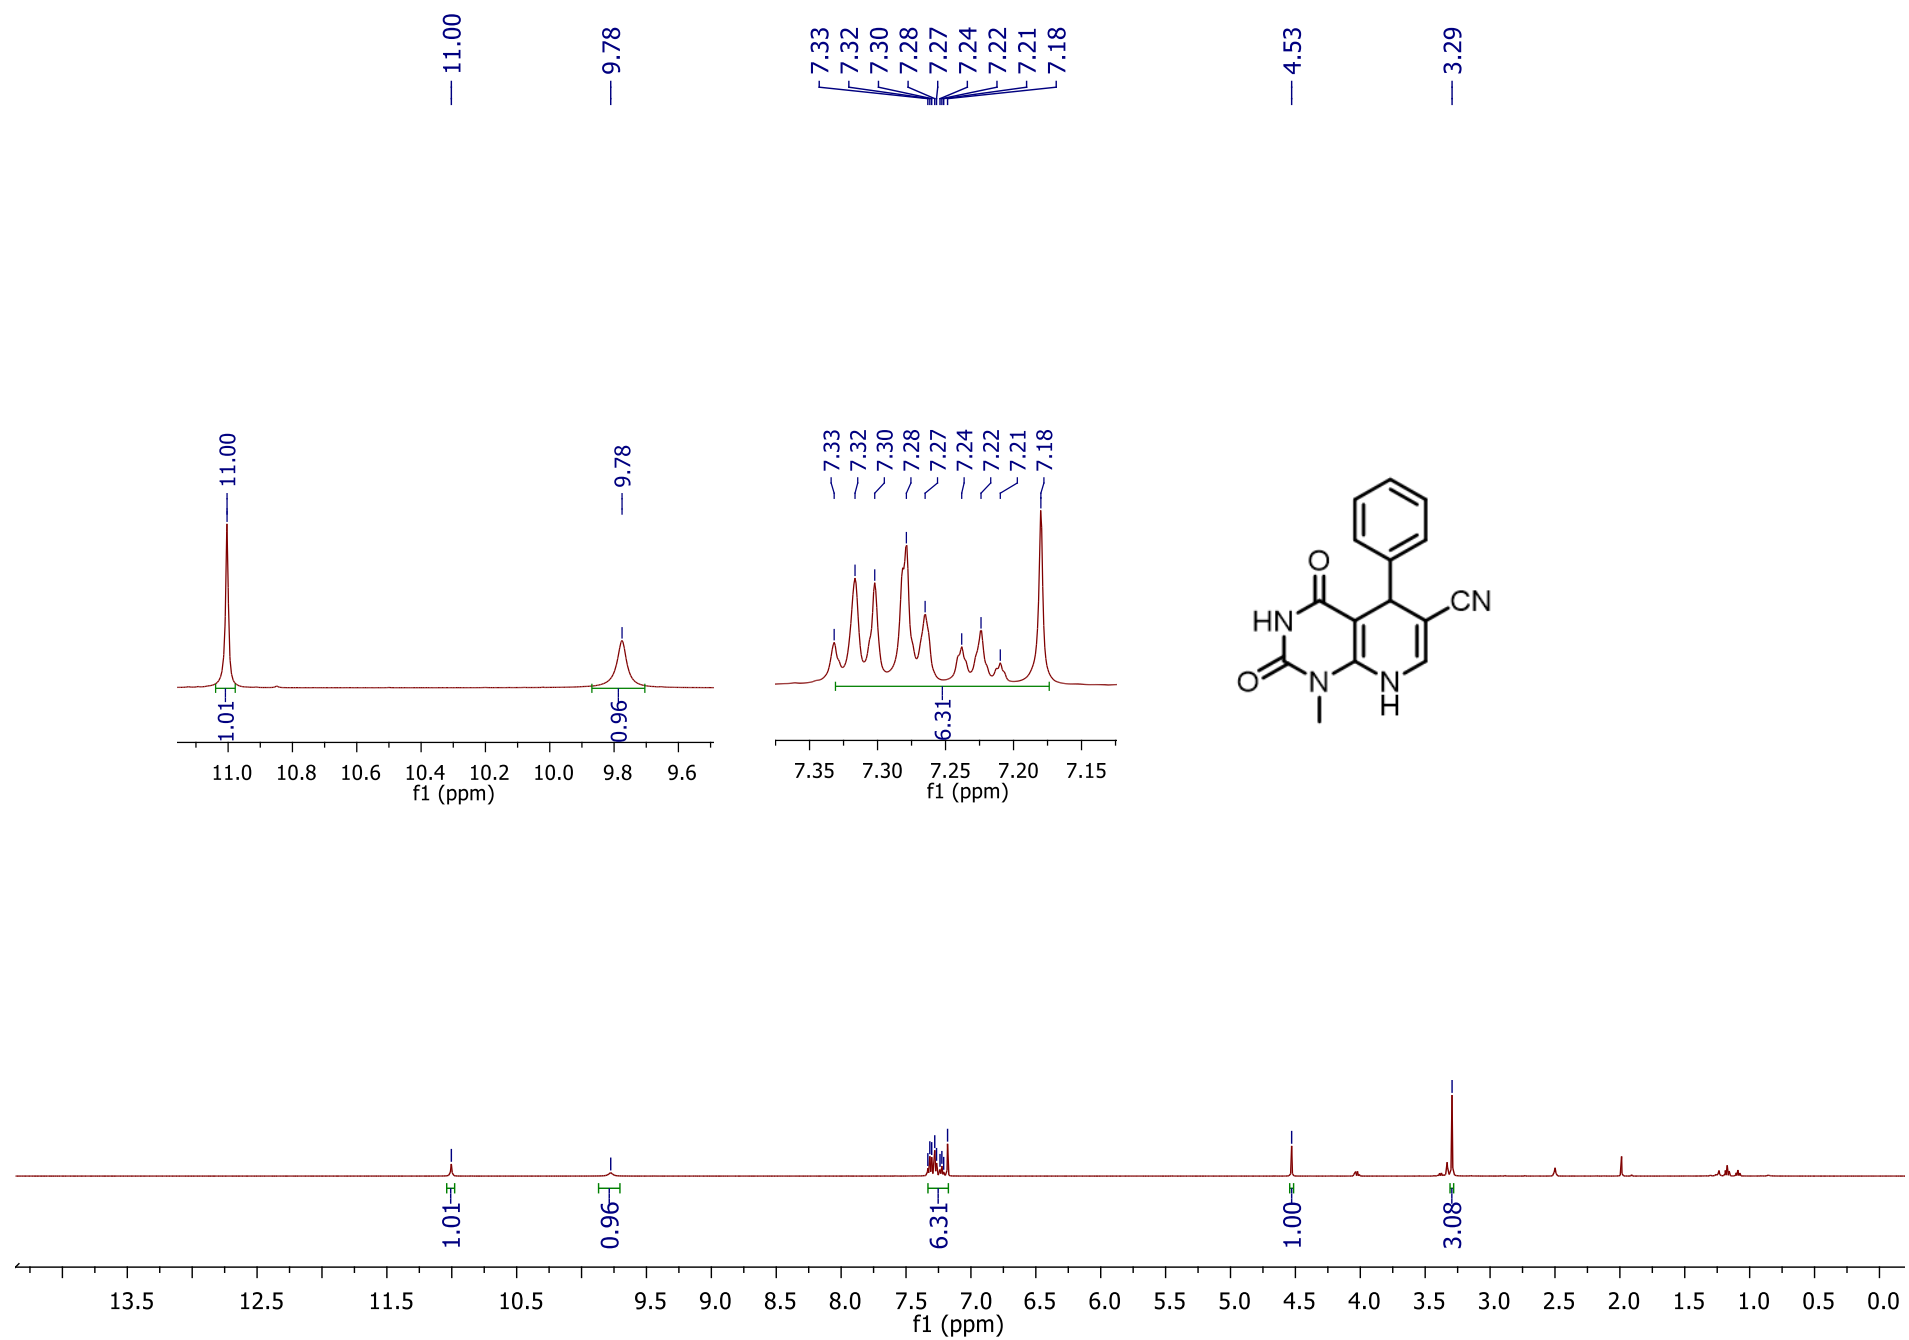

**Figure S41.** <sup>1</sup>H-NMR (DMSO-d<sub>6</sub>) spectra of compound **4ab**.

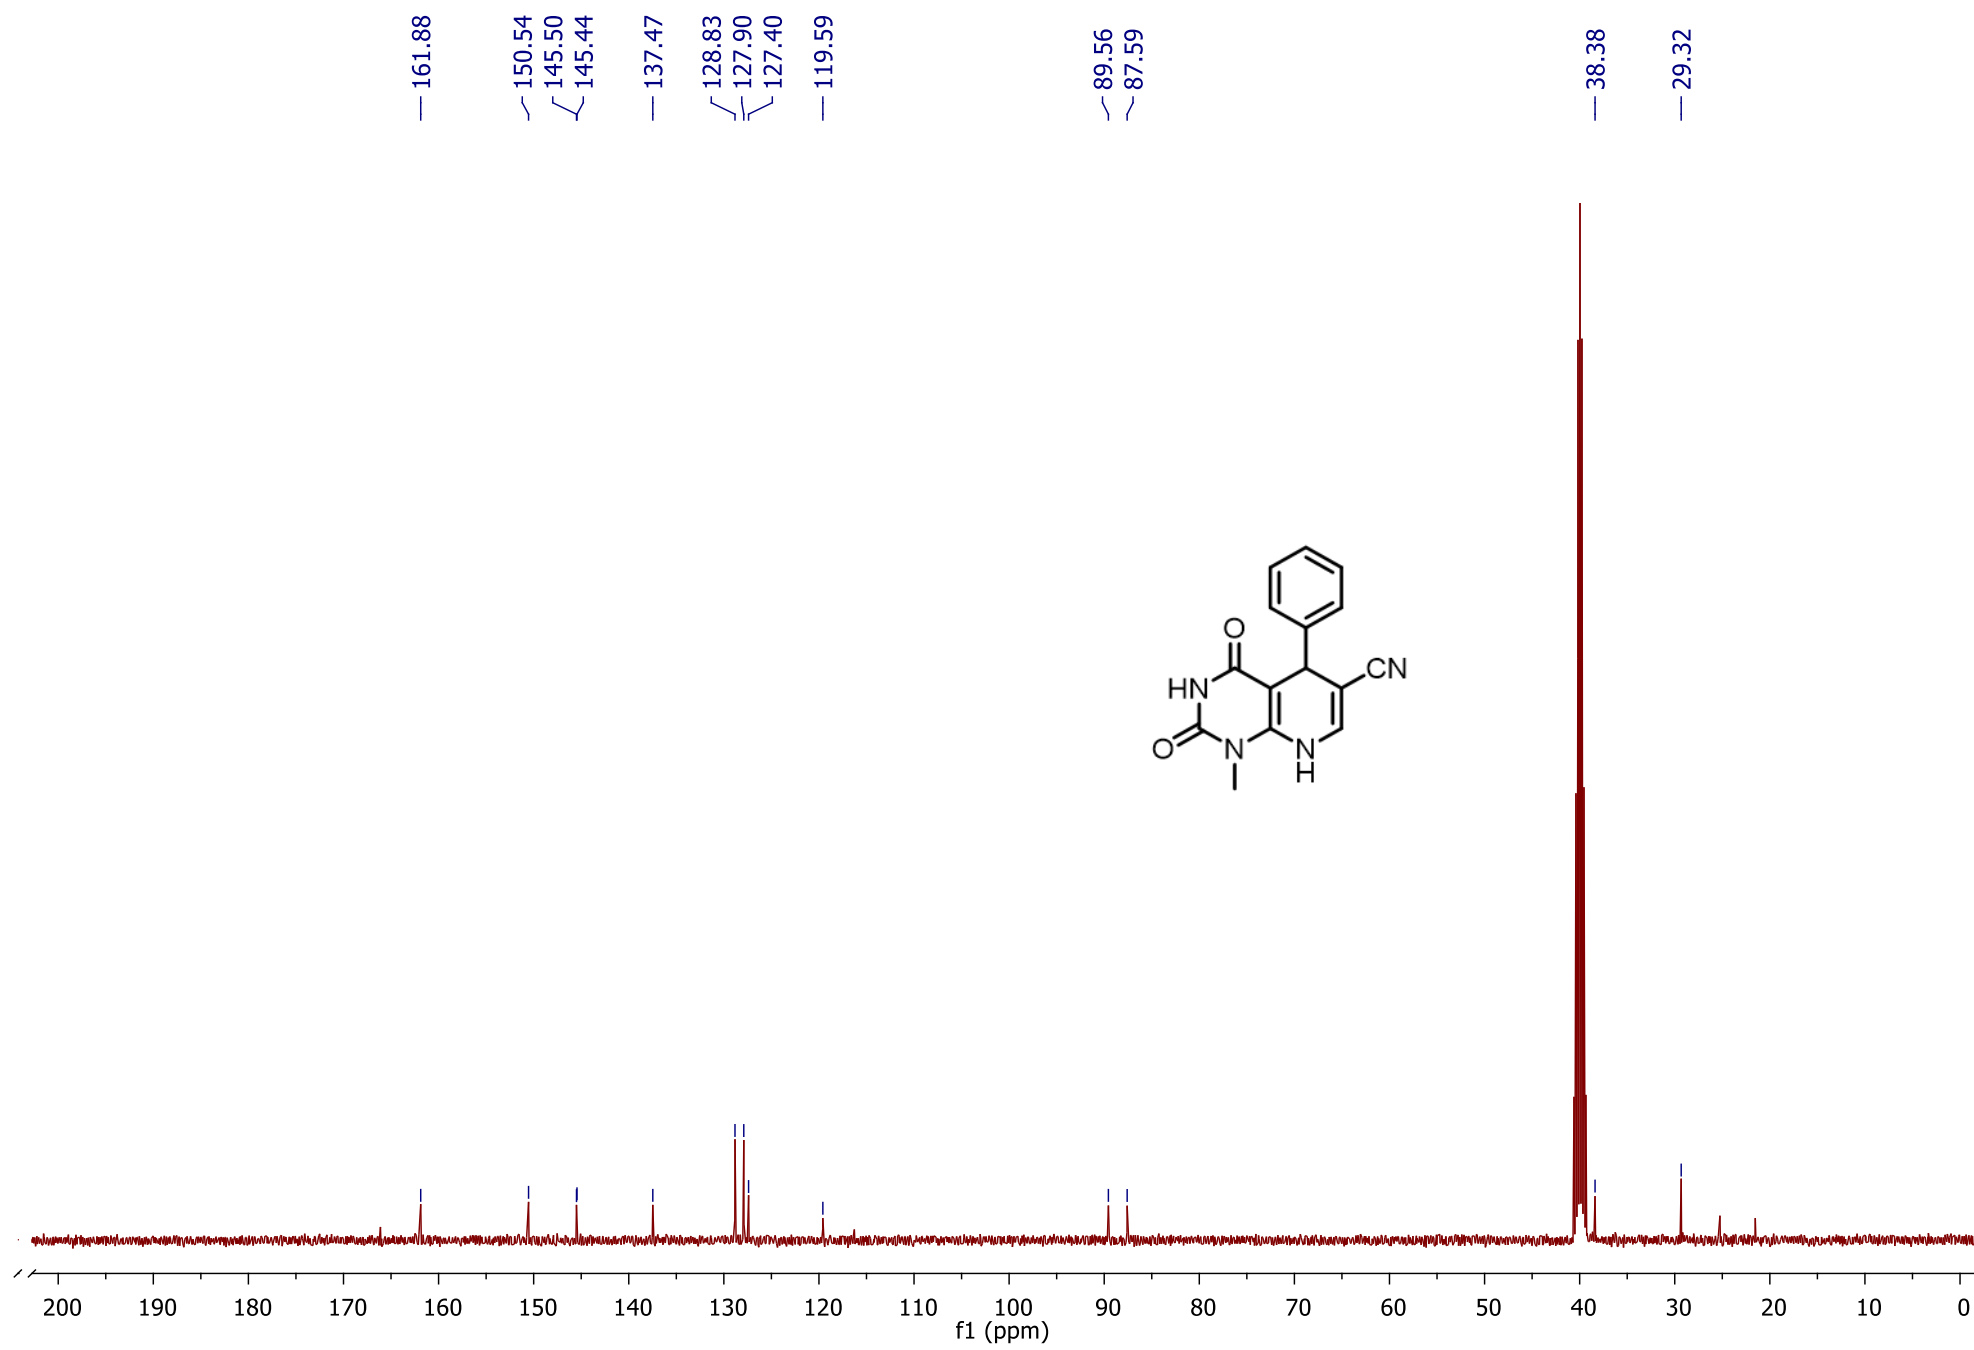

Figure S42. <sup>13</sup>C-NMR (DMSO-d<sub>6</sub>) spectra of compound **4ab**.

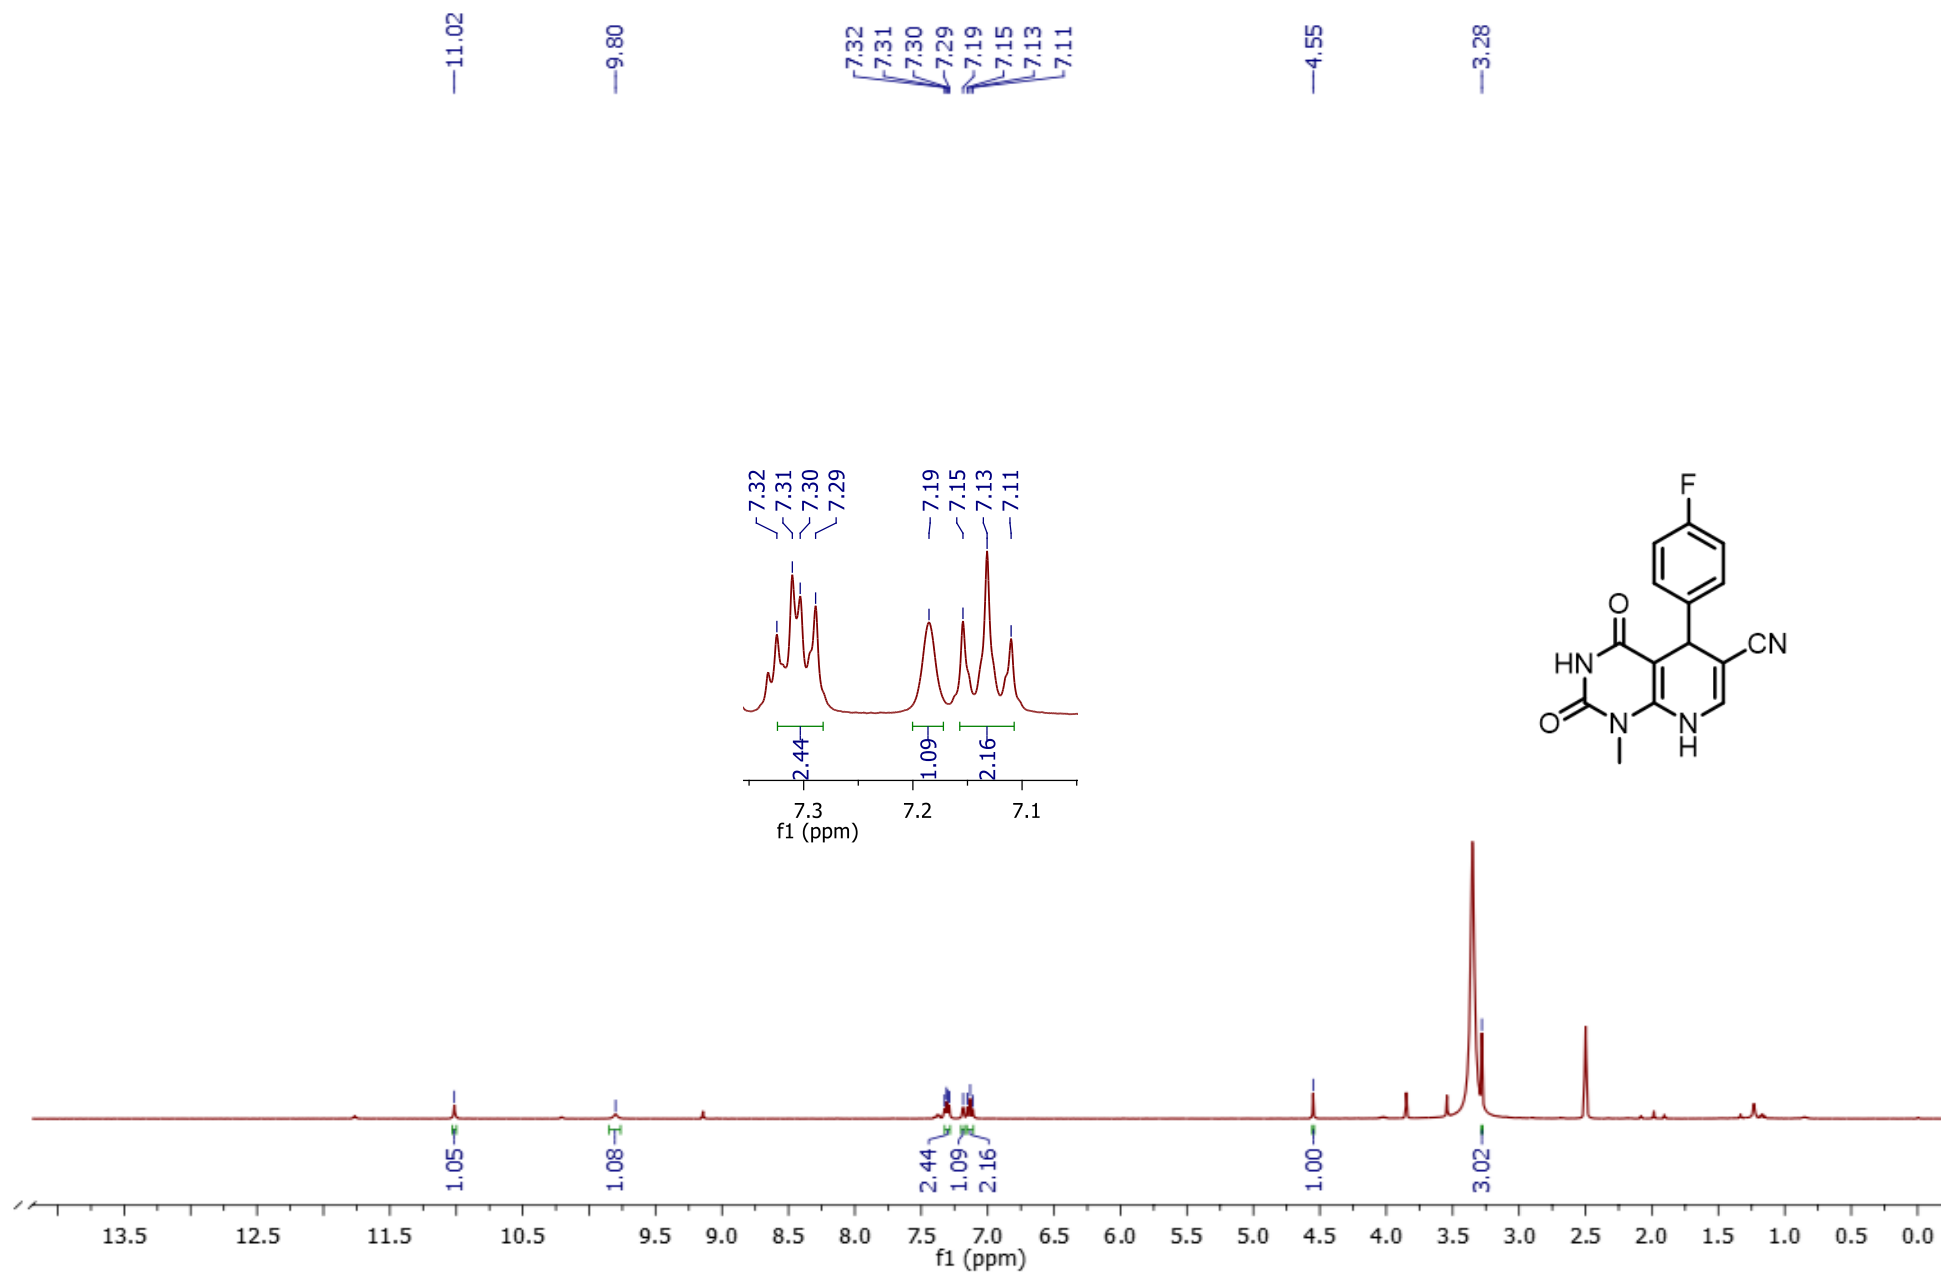

**Figure S43.**  $^1\text{H-NMR}$  ( $\text{DMSO-d}_6$ ) spectra of compound **4ac**.

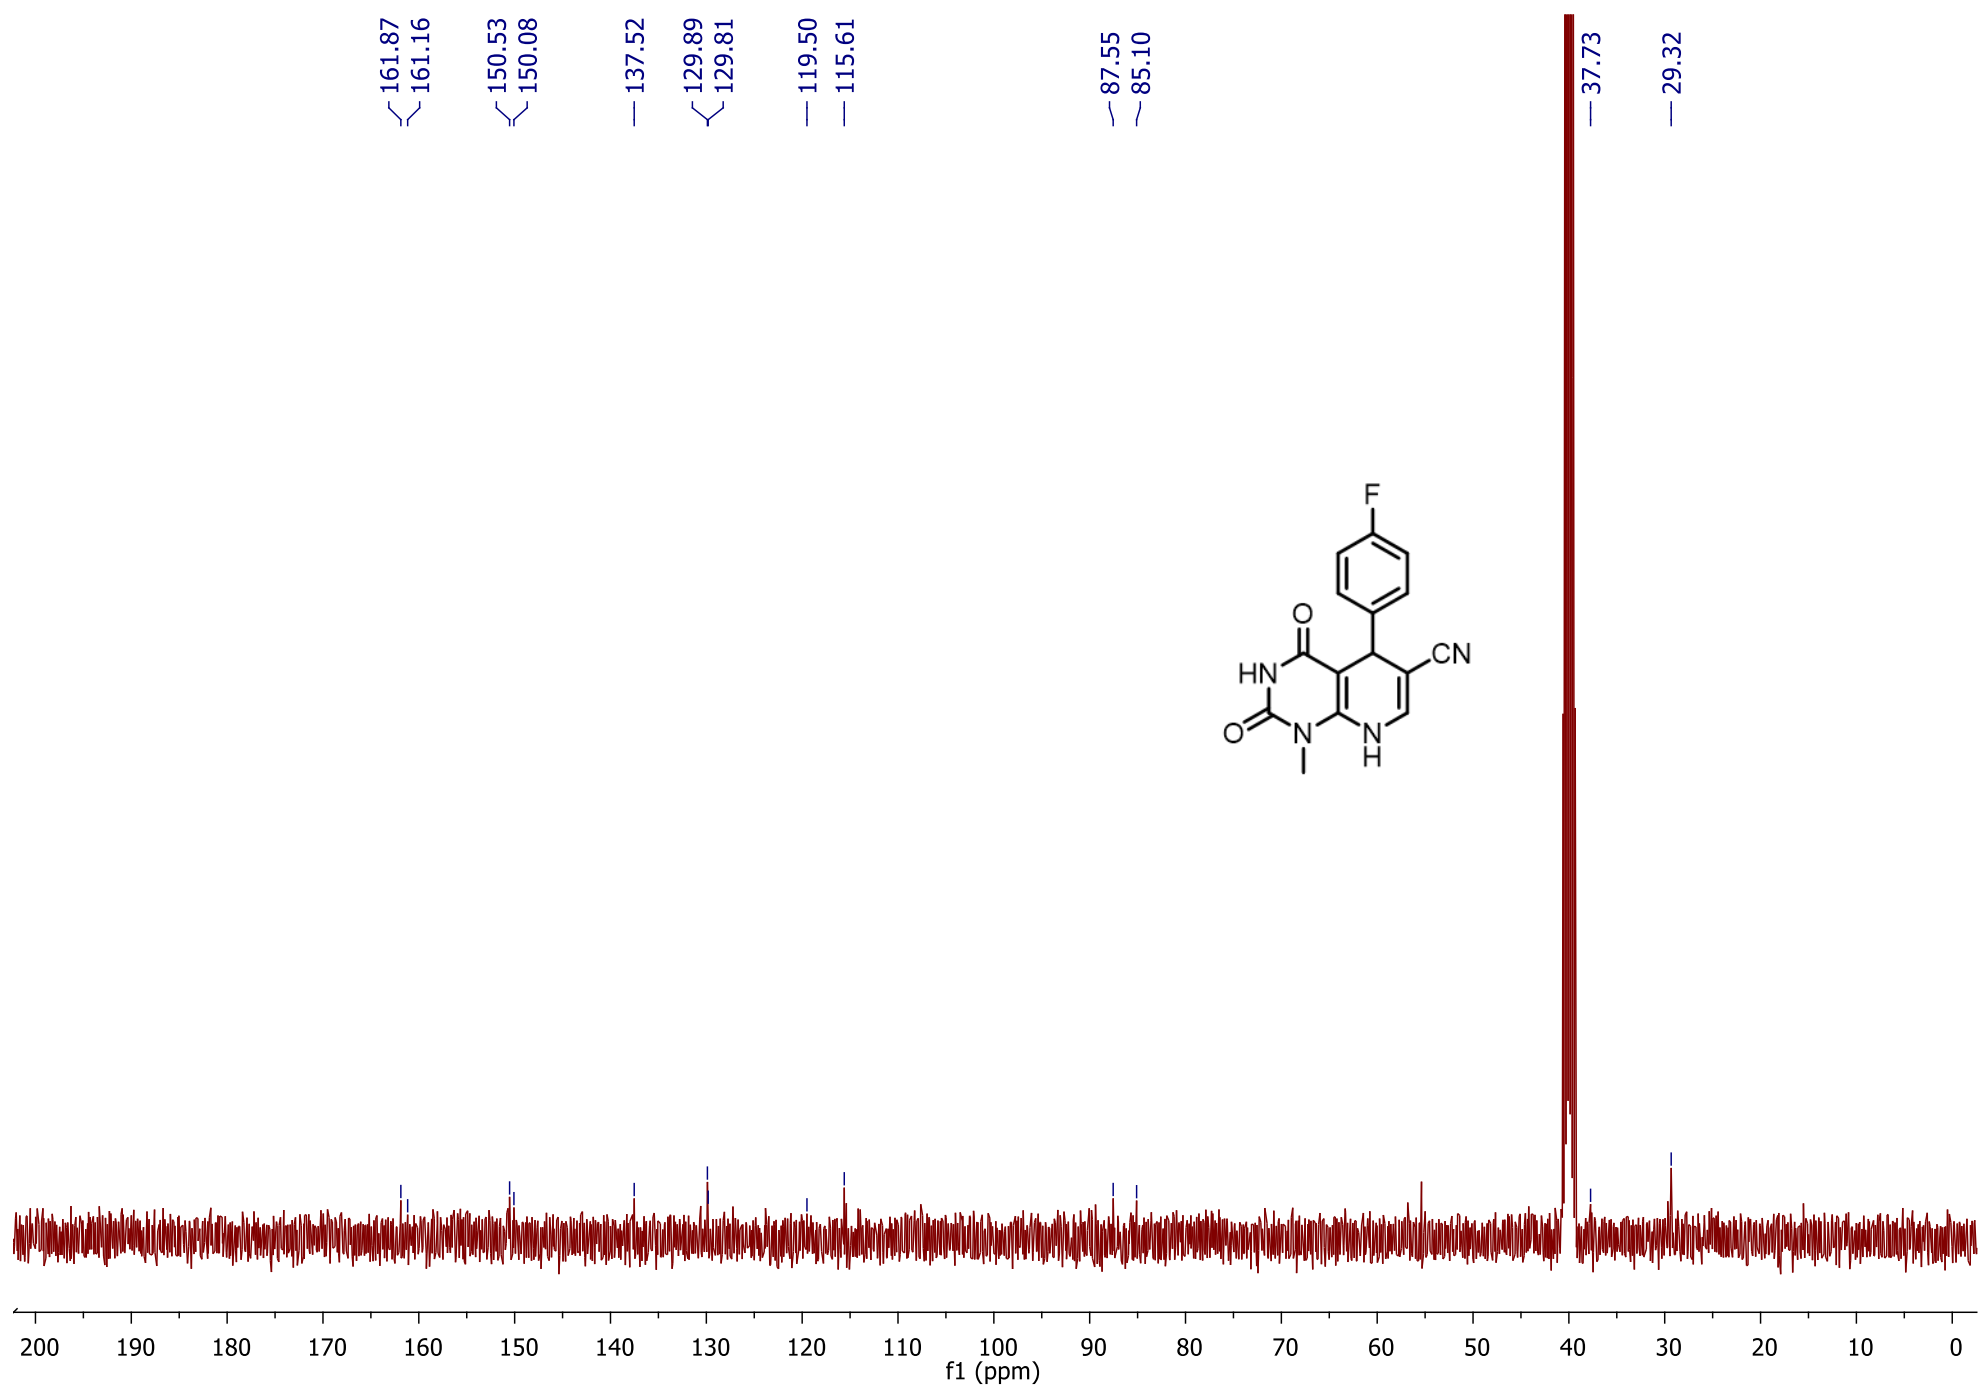

**Figure S44.**  $^{13}\text{C}$ -NMR (DMSO- $d_6$ ) spectra of compound **4ac**.

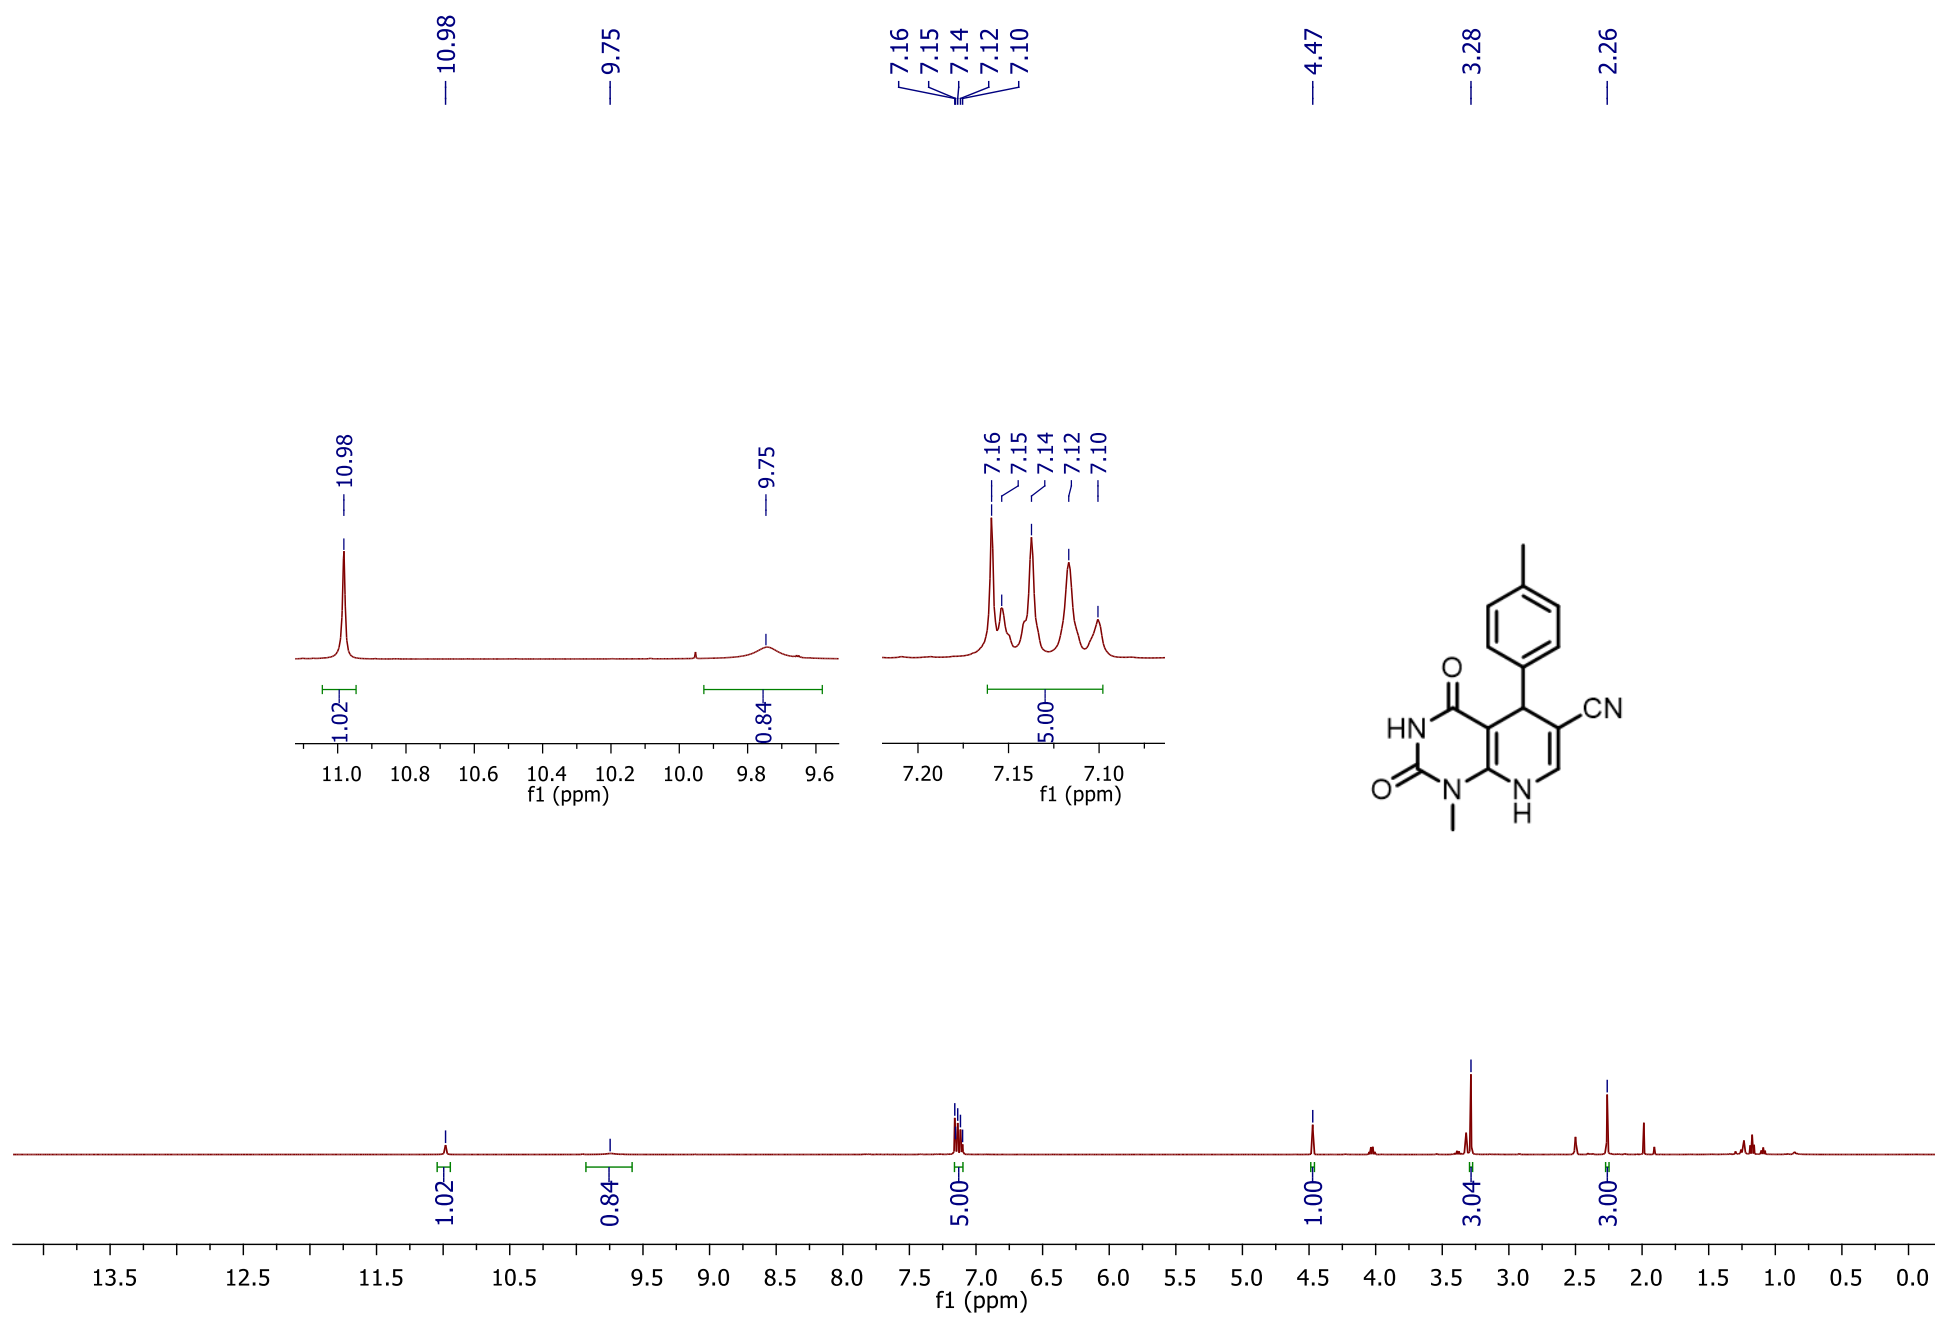

**Figure S45.**  $^1\text{H-NMR}$  ( $\text{DMSO-d}_6$ ) spectra of compound **4ad**.

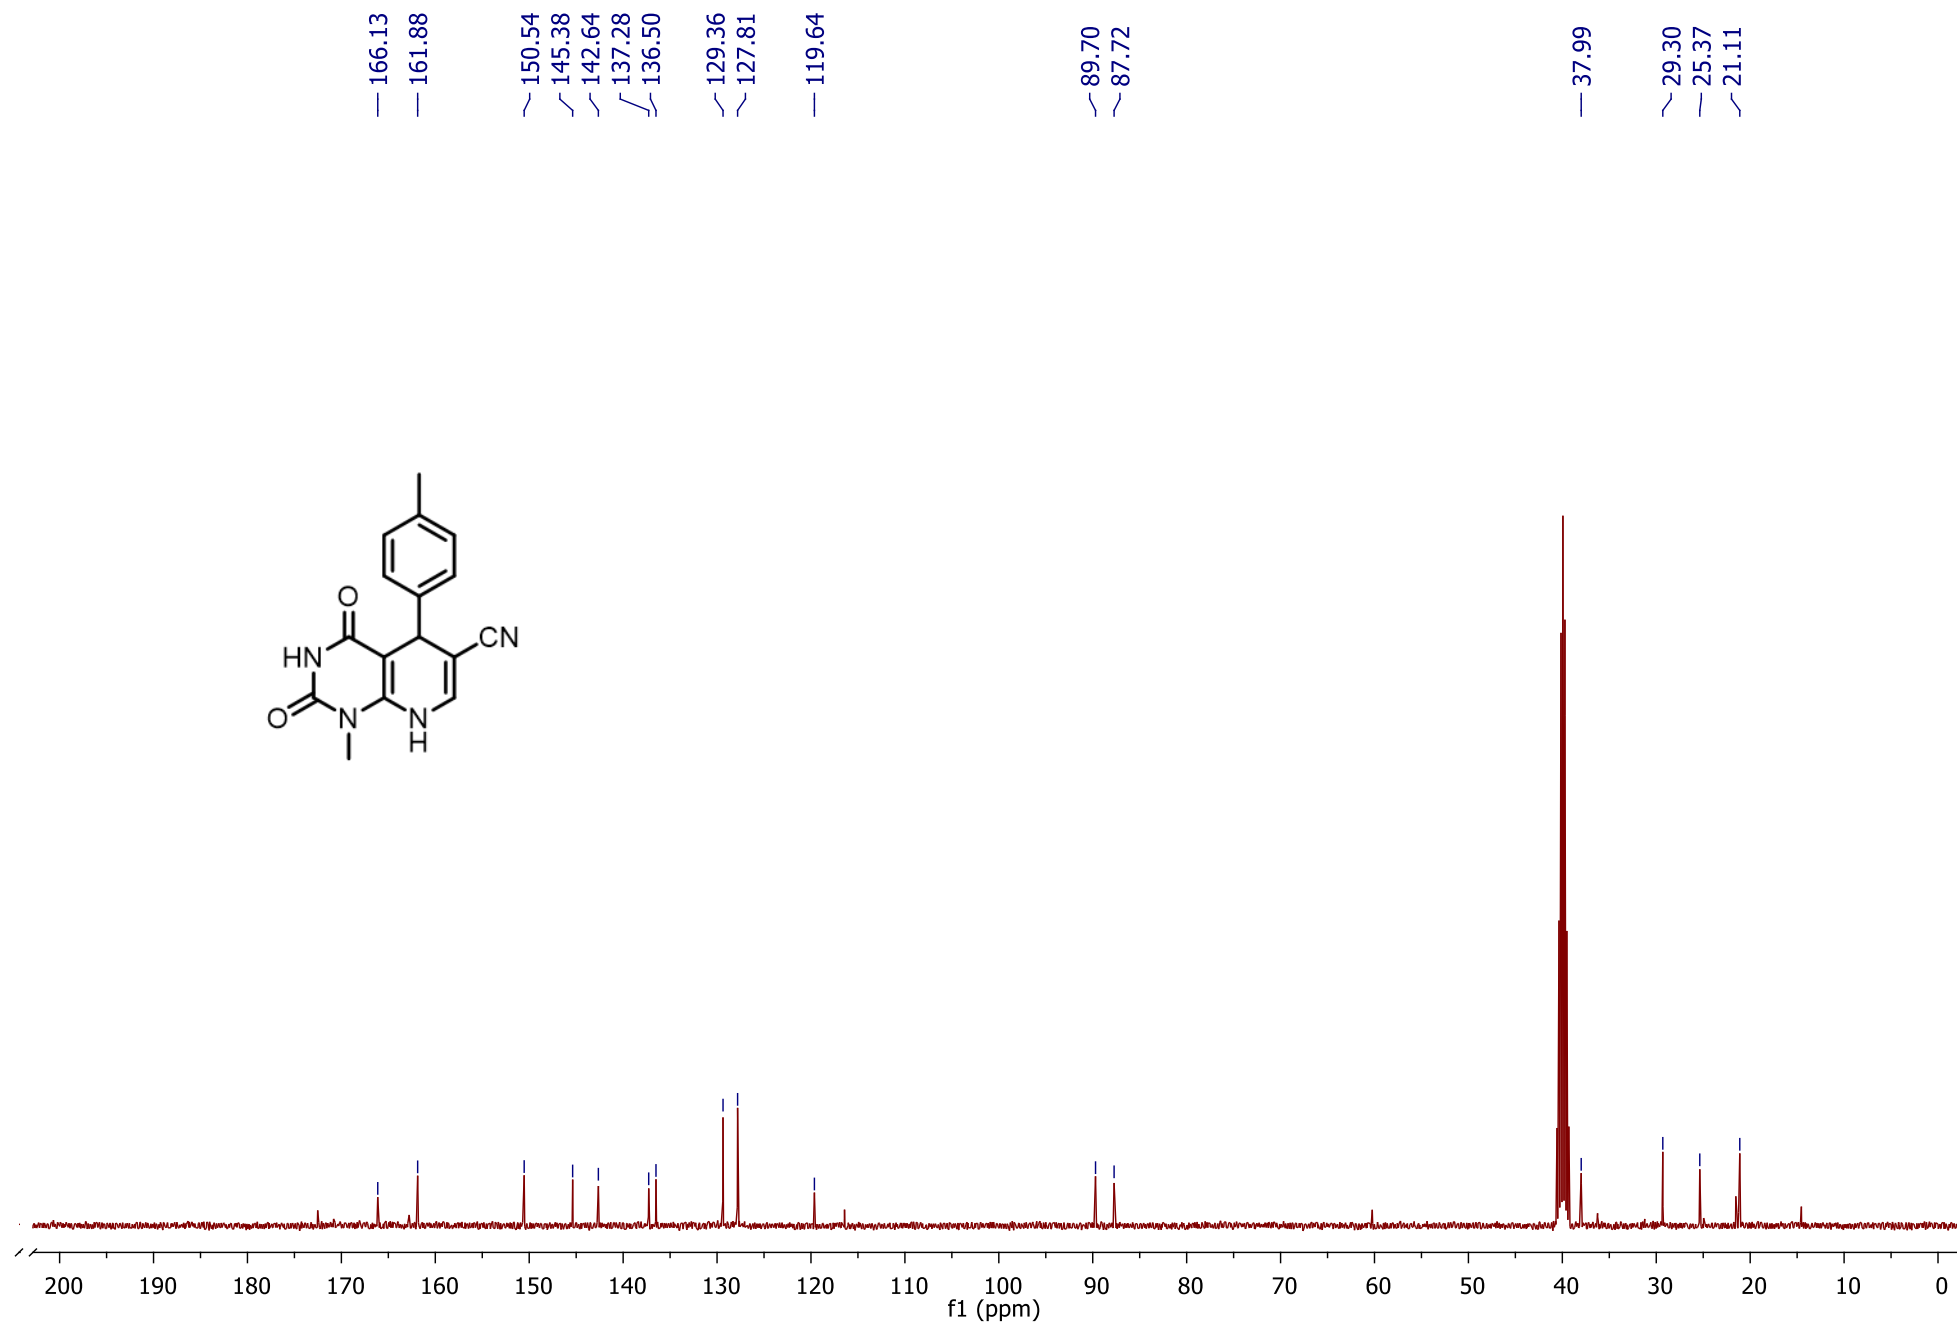

**Figure S46.**  $^{13}\text{C}$ -NMR (DMSO- $d_6$ ) spectra of compound **4ad**.

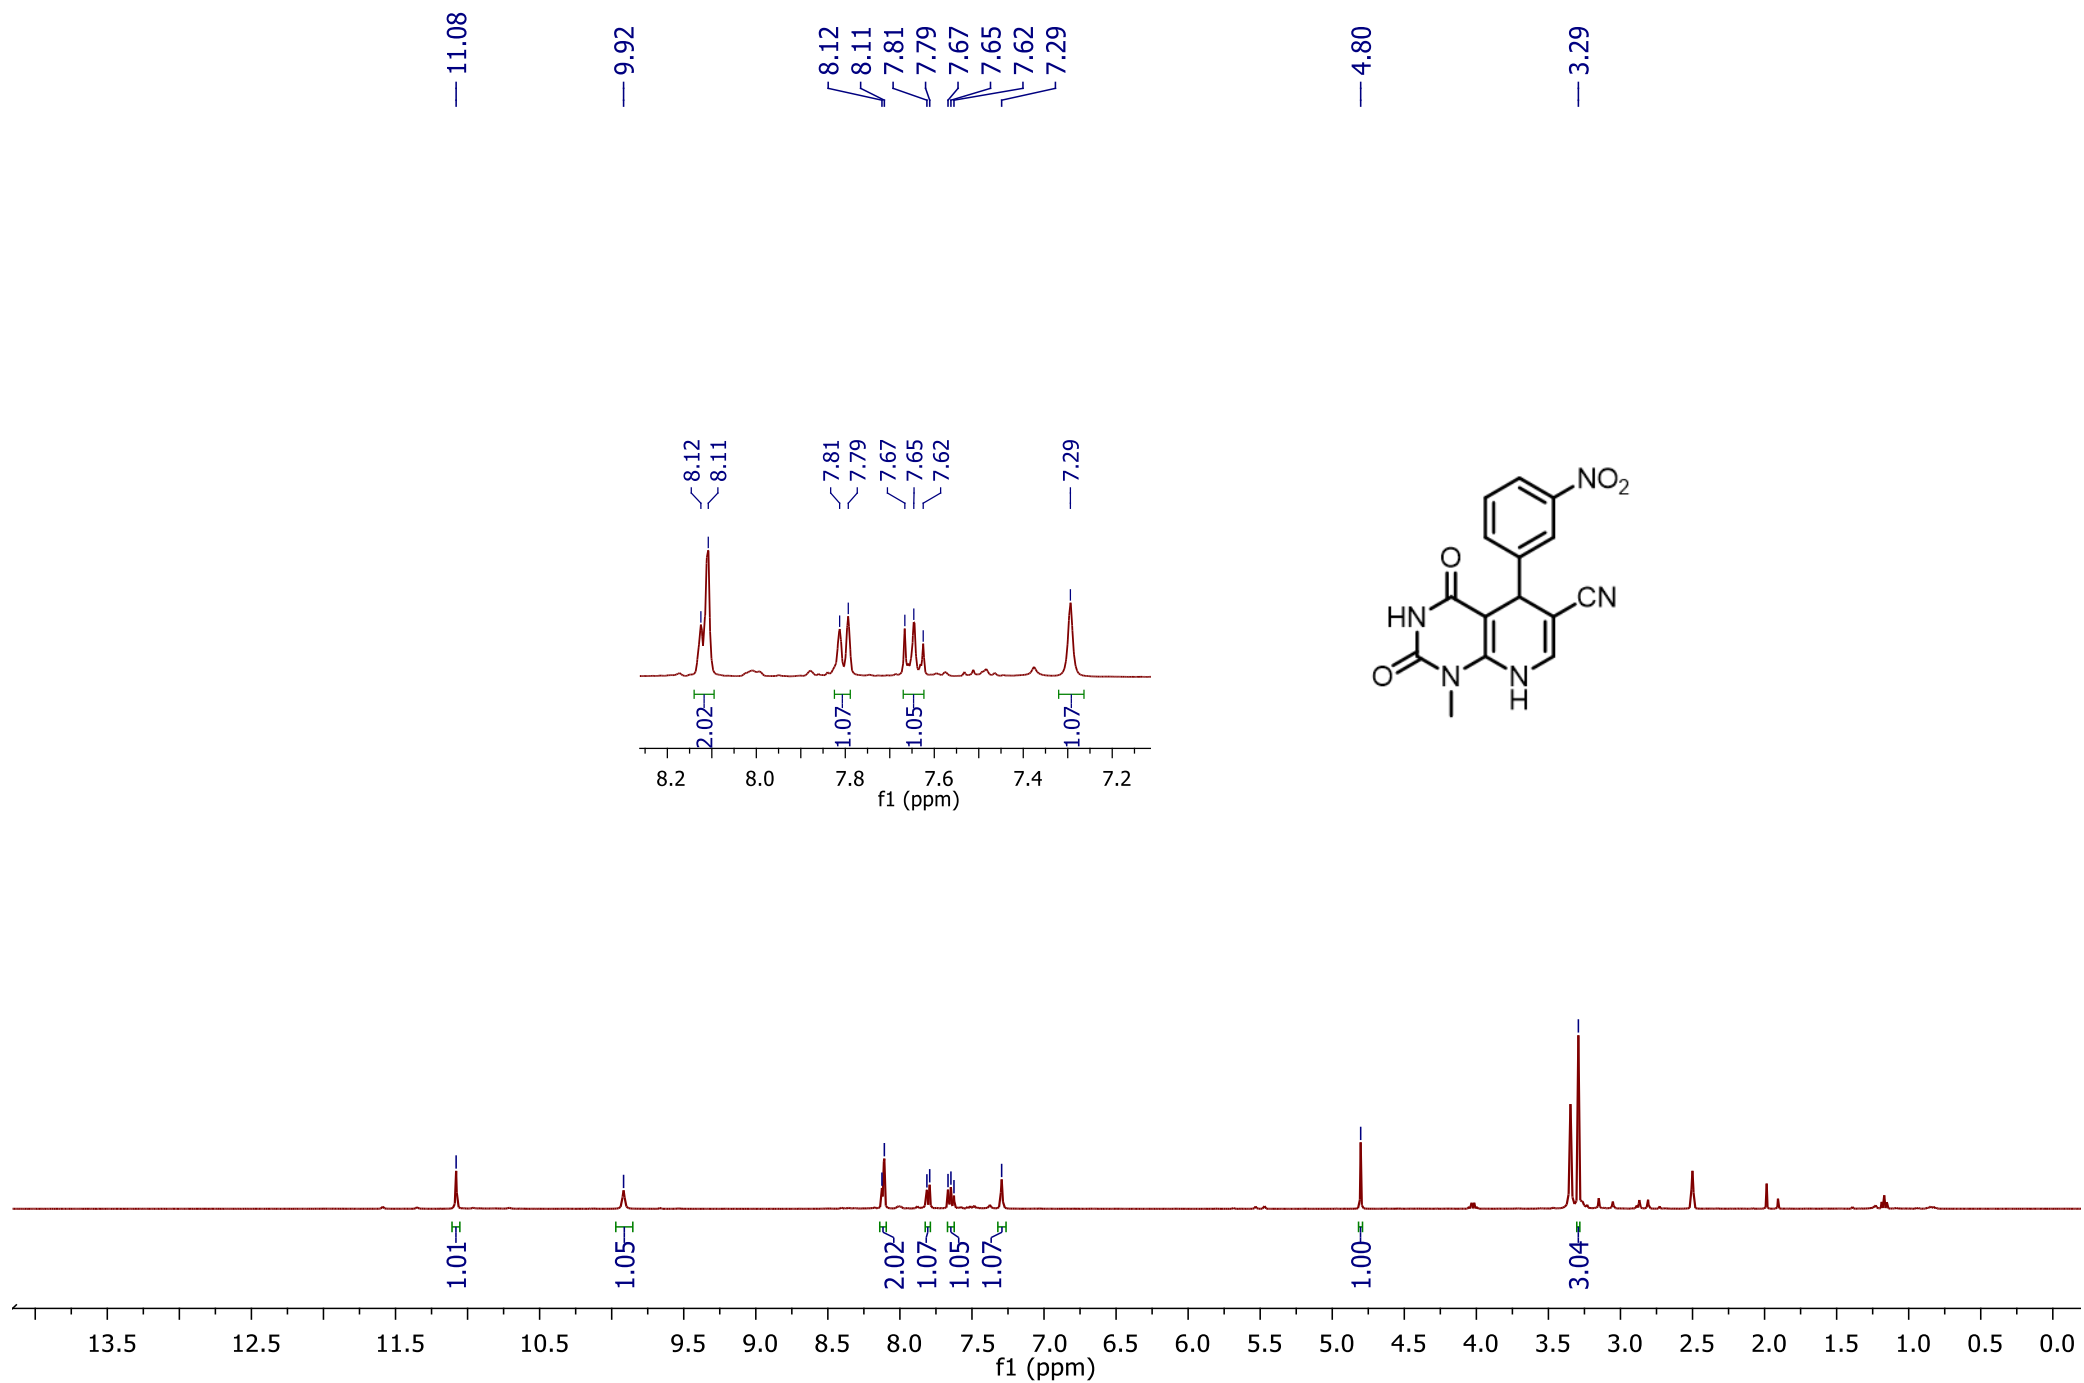

Figure S47. <sup>1</sup>H-NMR (DMSO-d<sub>6</sub>) spectra of compound **4ae**.

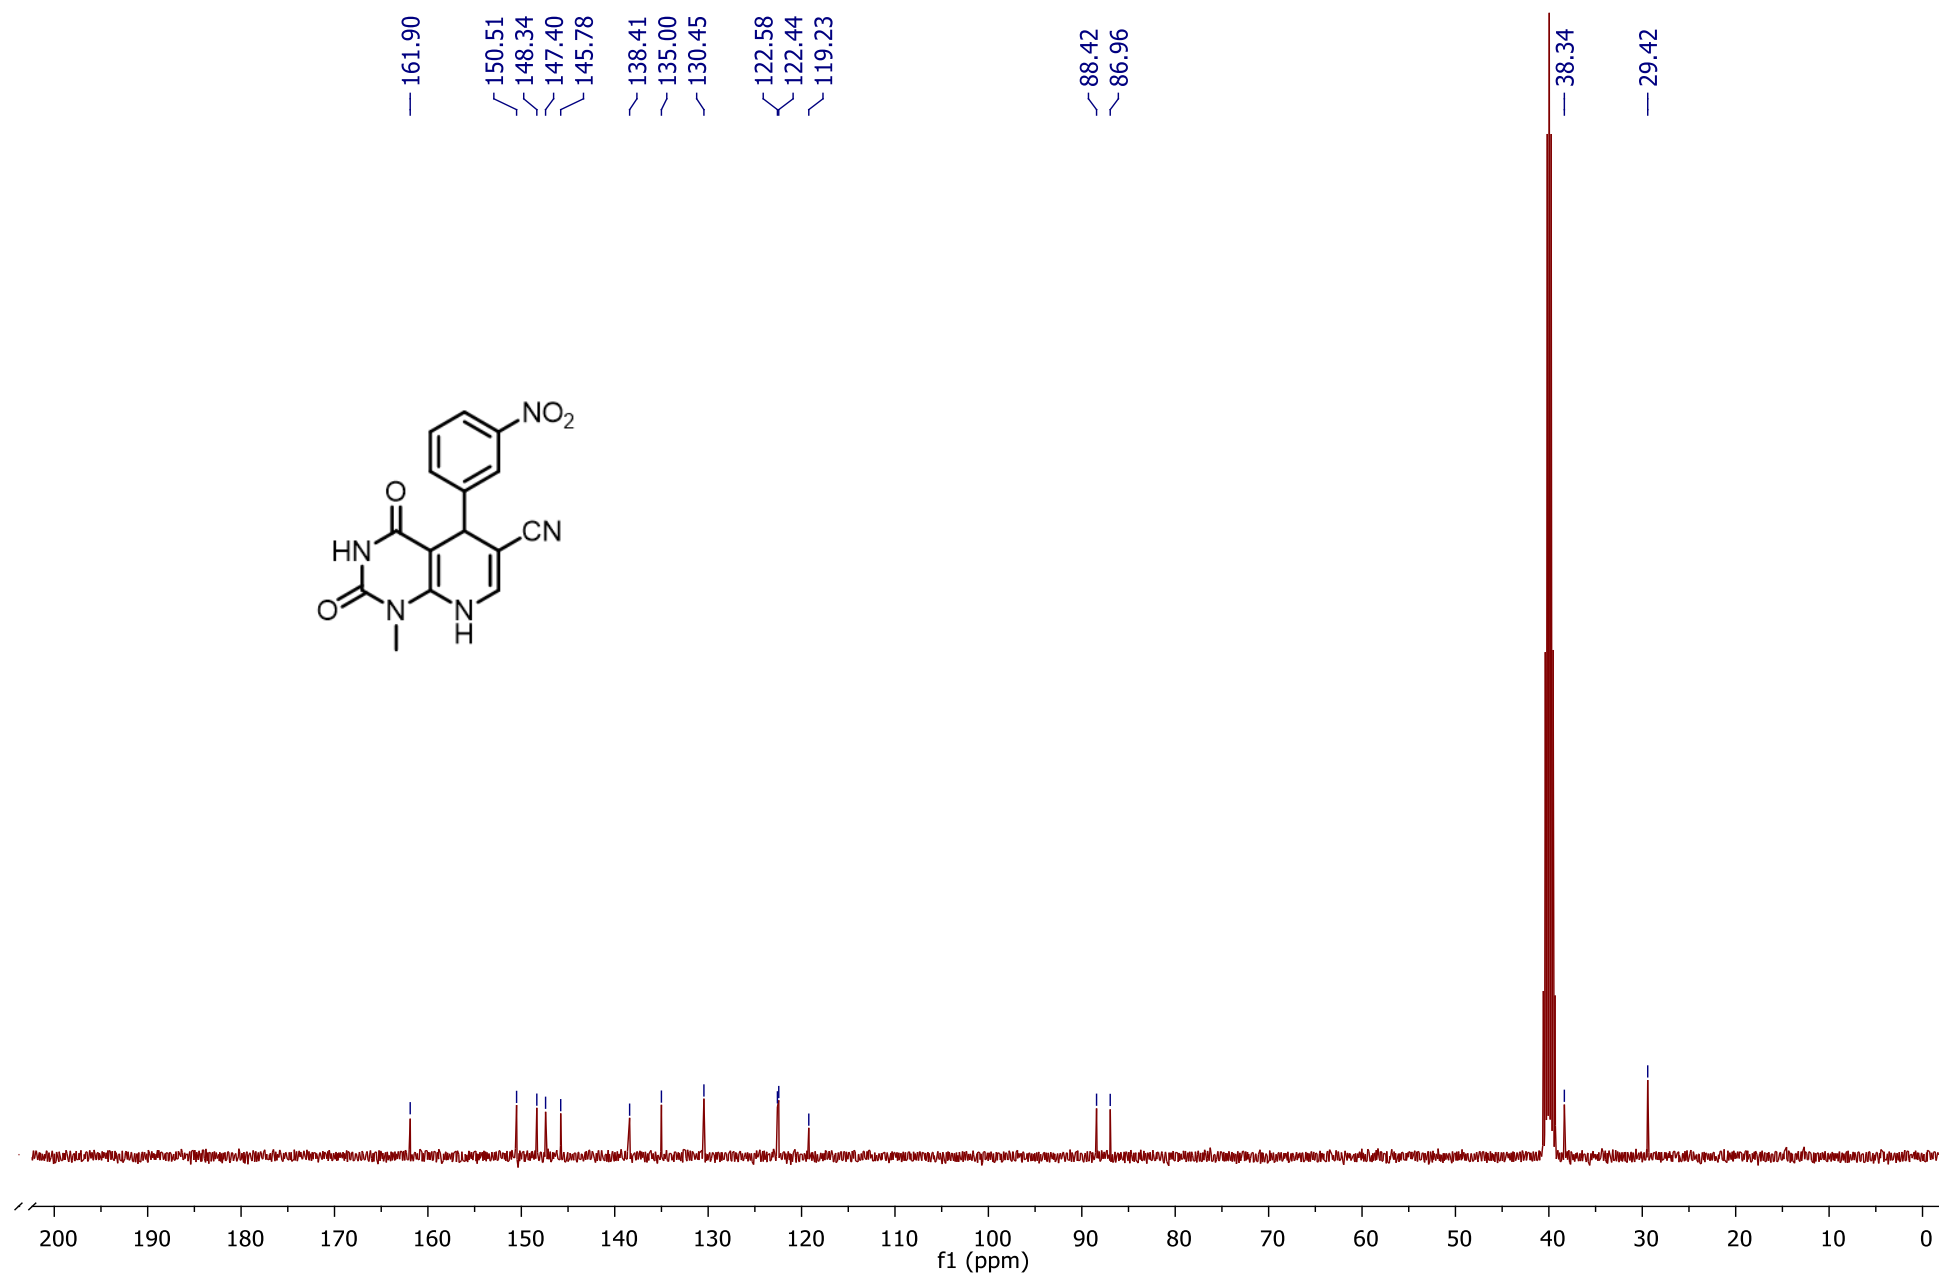

**Figure S48.** <sup>13</sup>C-NMR (DMSO-d<sub>6</sub>) spectra of compound **4ae**.

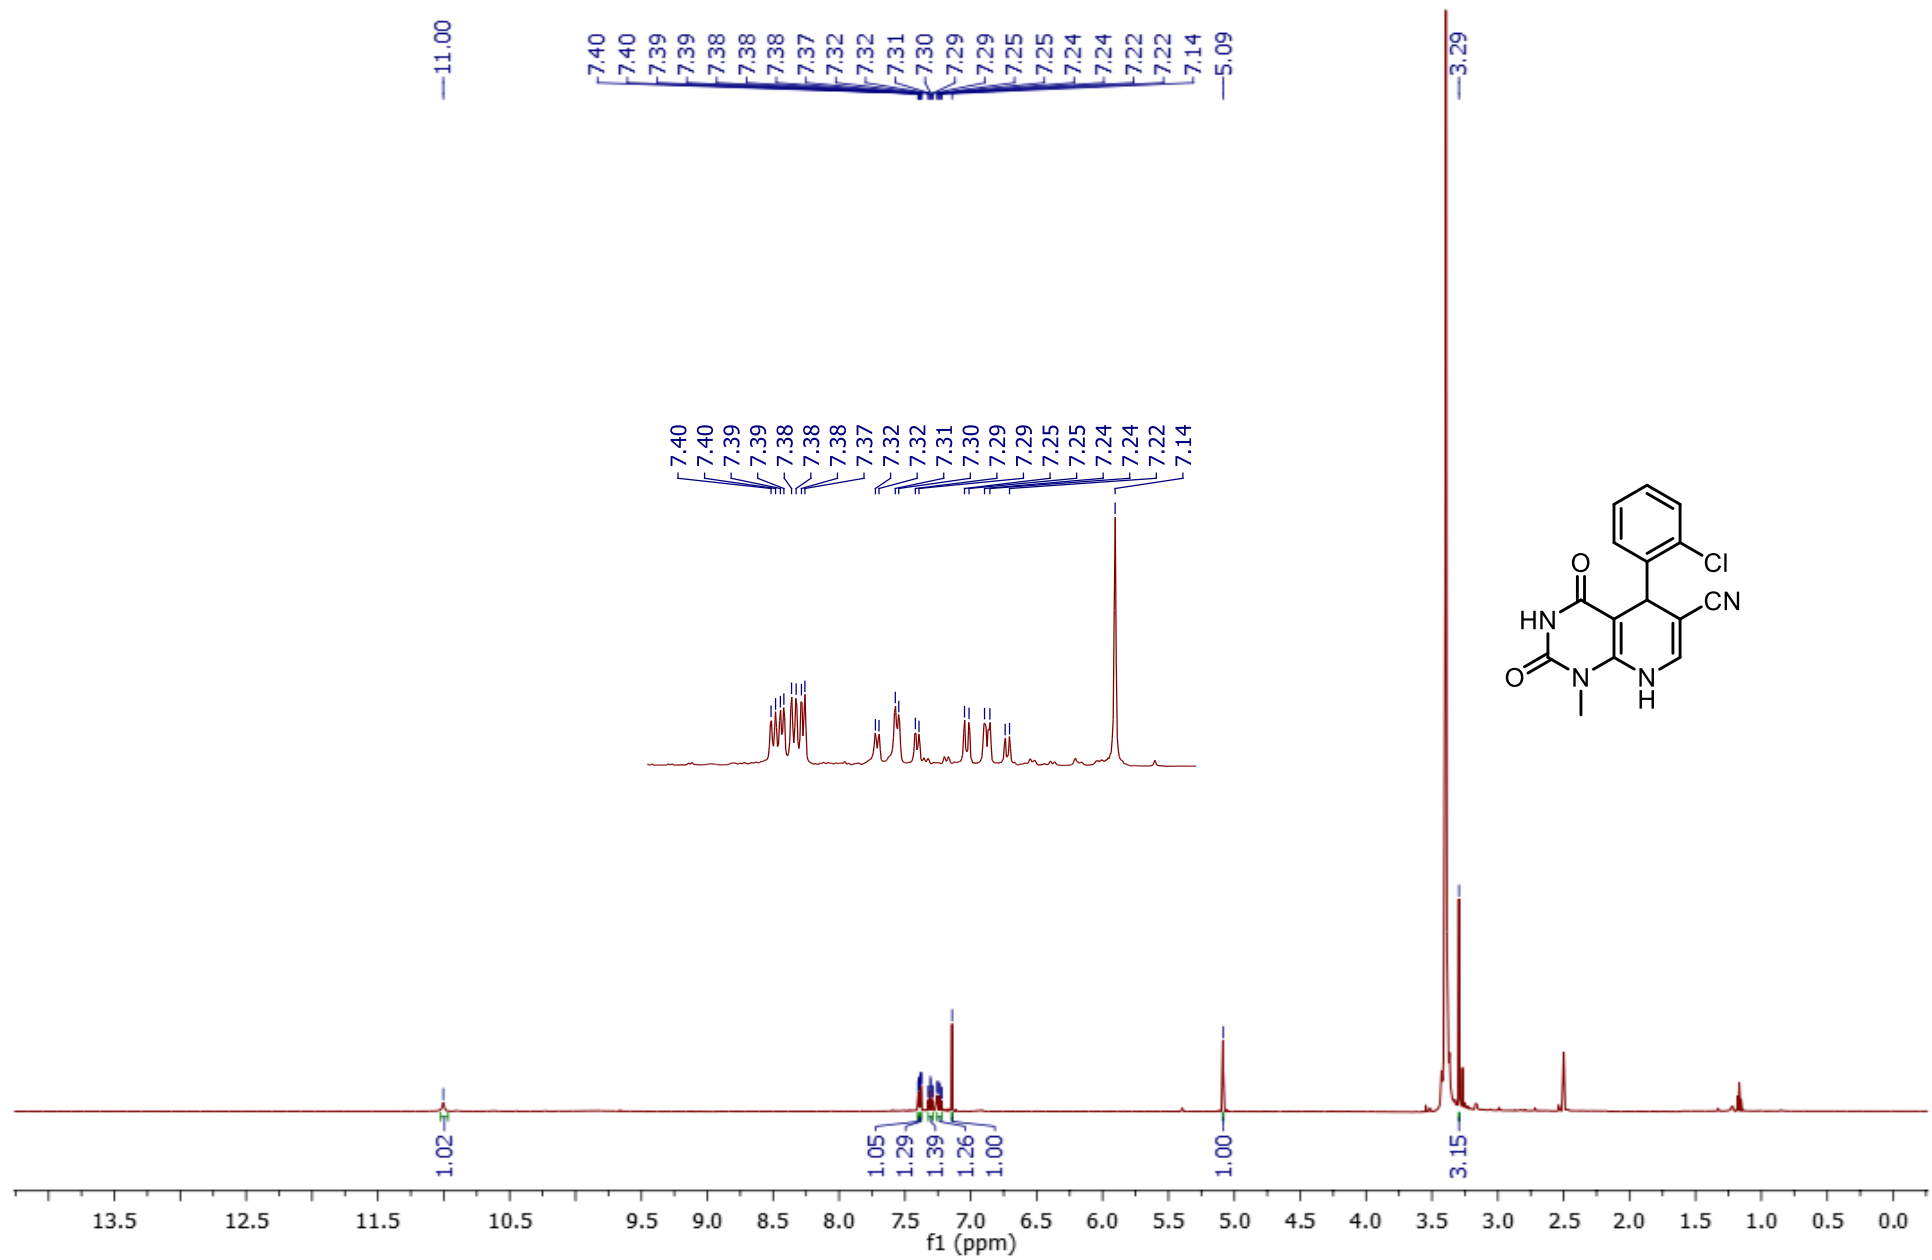

Figure S49. <sup>1</sup>H-NMR (DMSO-d<sub>6</sub>) spectra of compound 4af.

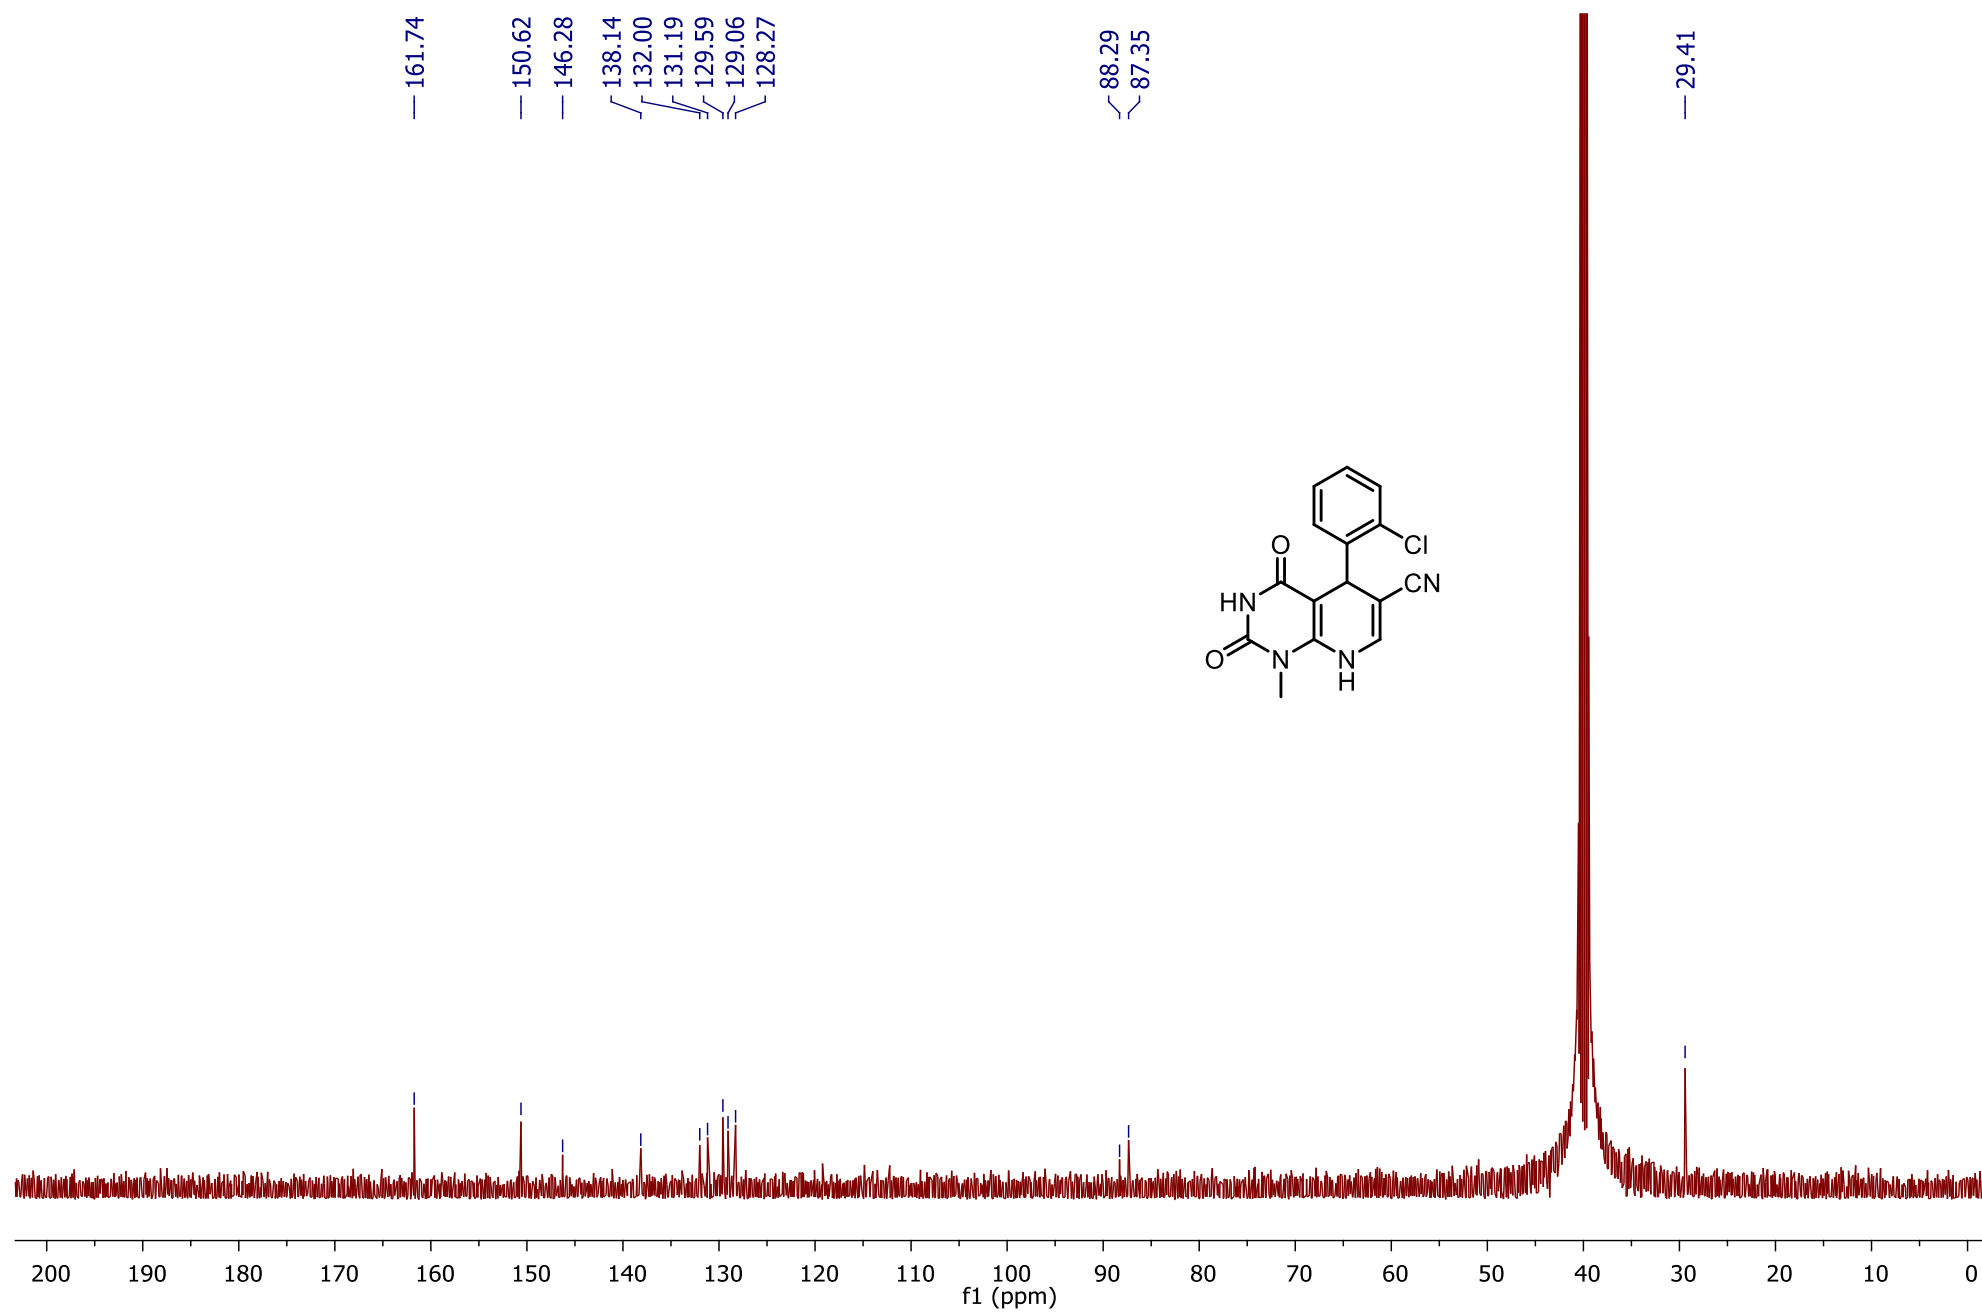

Figure S50. <sup>13</sup>C-NMR (DMSO-d<sub>6</sub>) spectra of compound 4af.

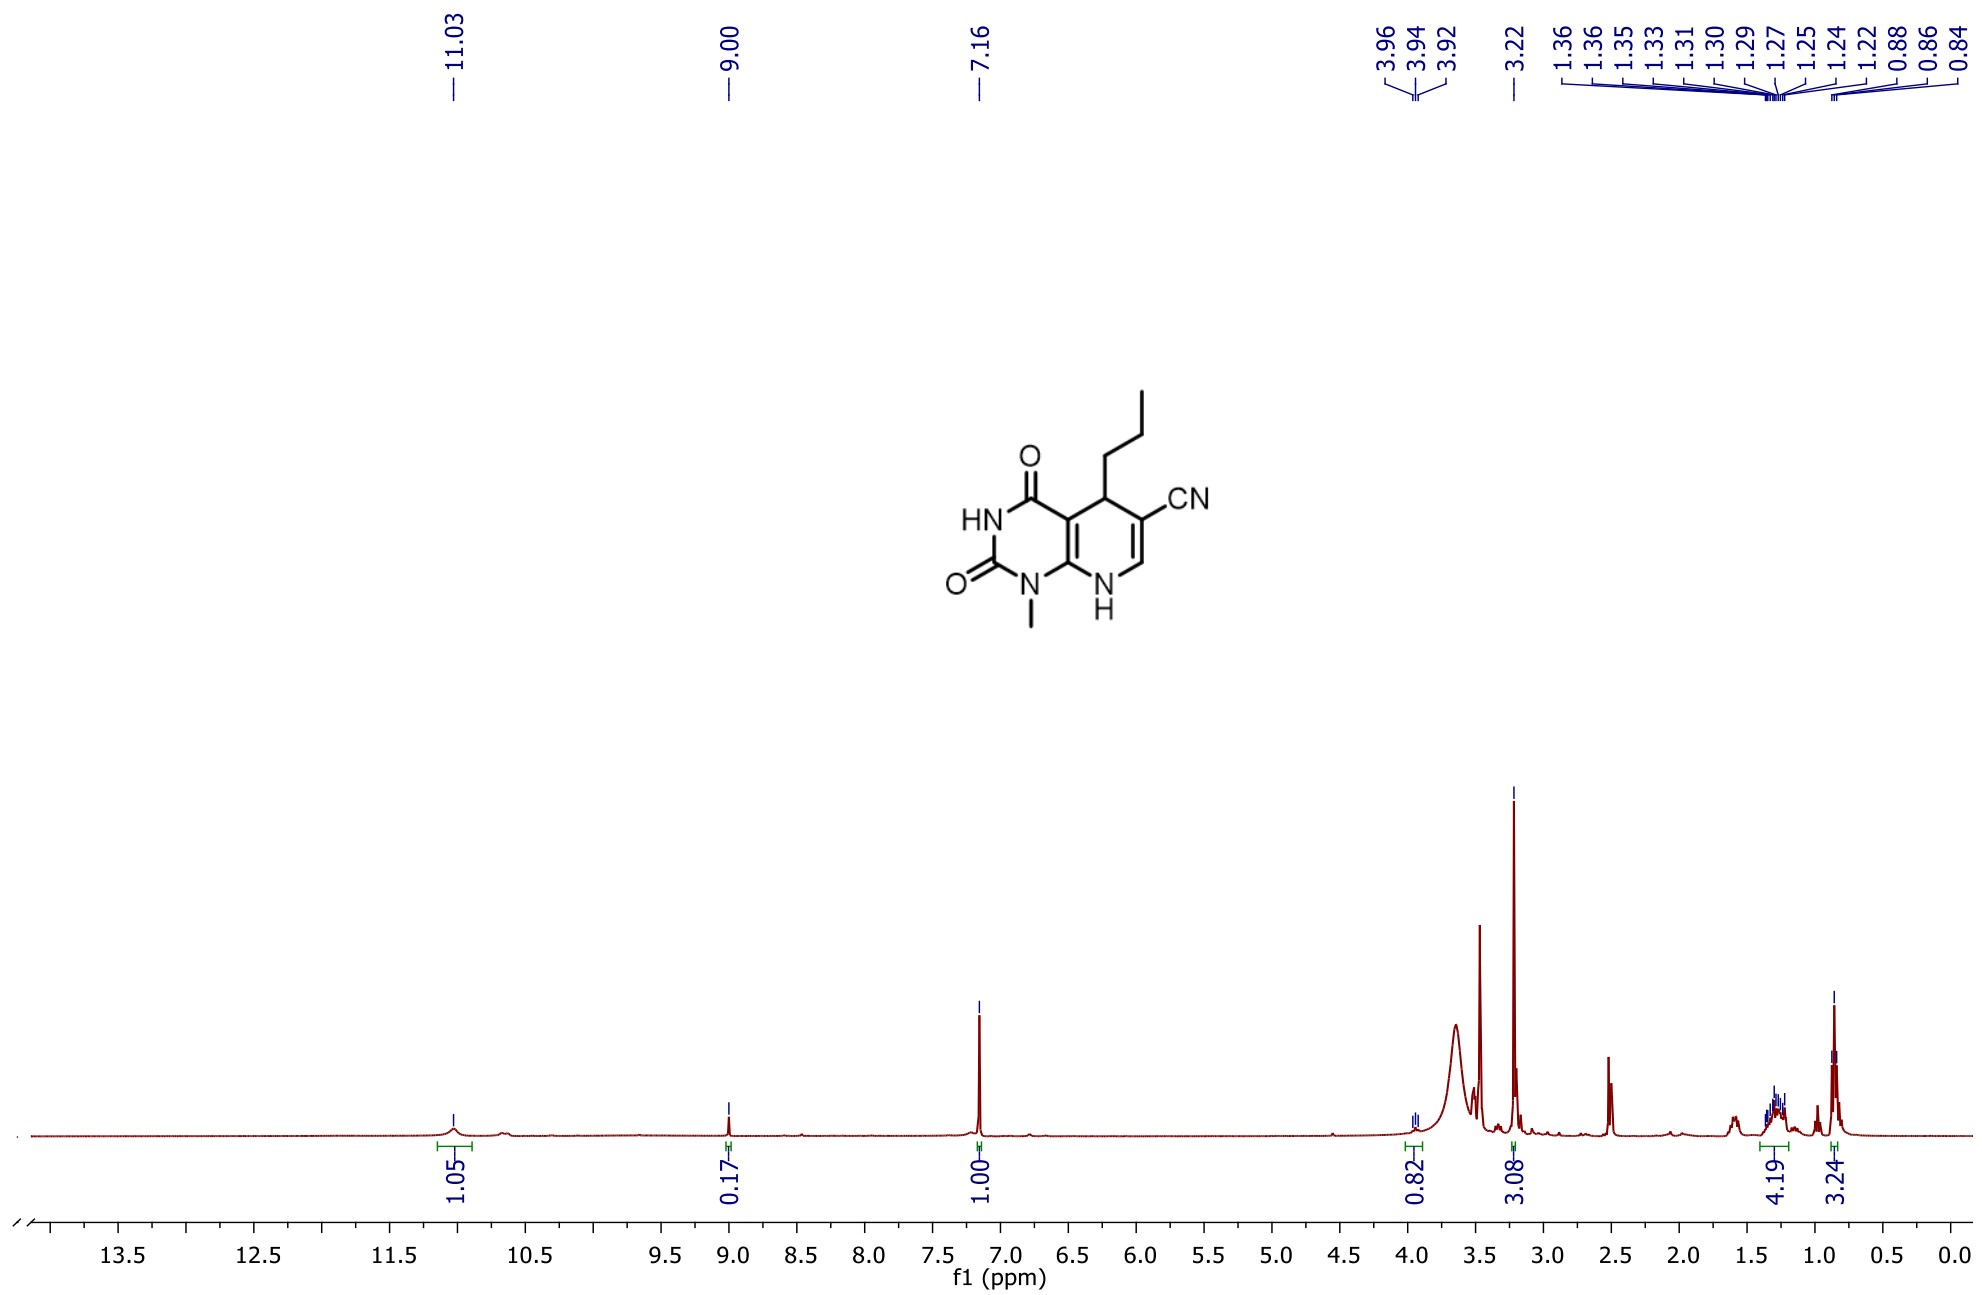

Figure S51. <sup>1</sup>H-NMR (DMSO-d<sub>6</sub>) spectra of compound 4ag.

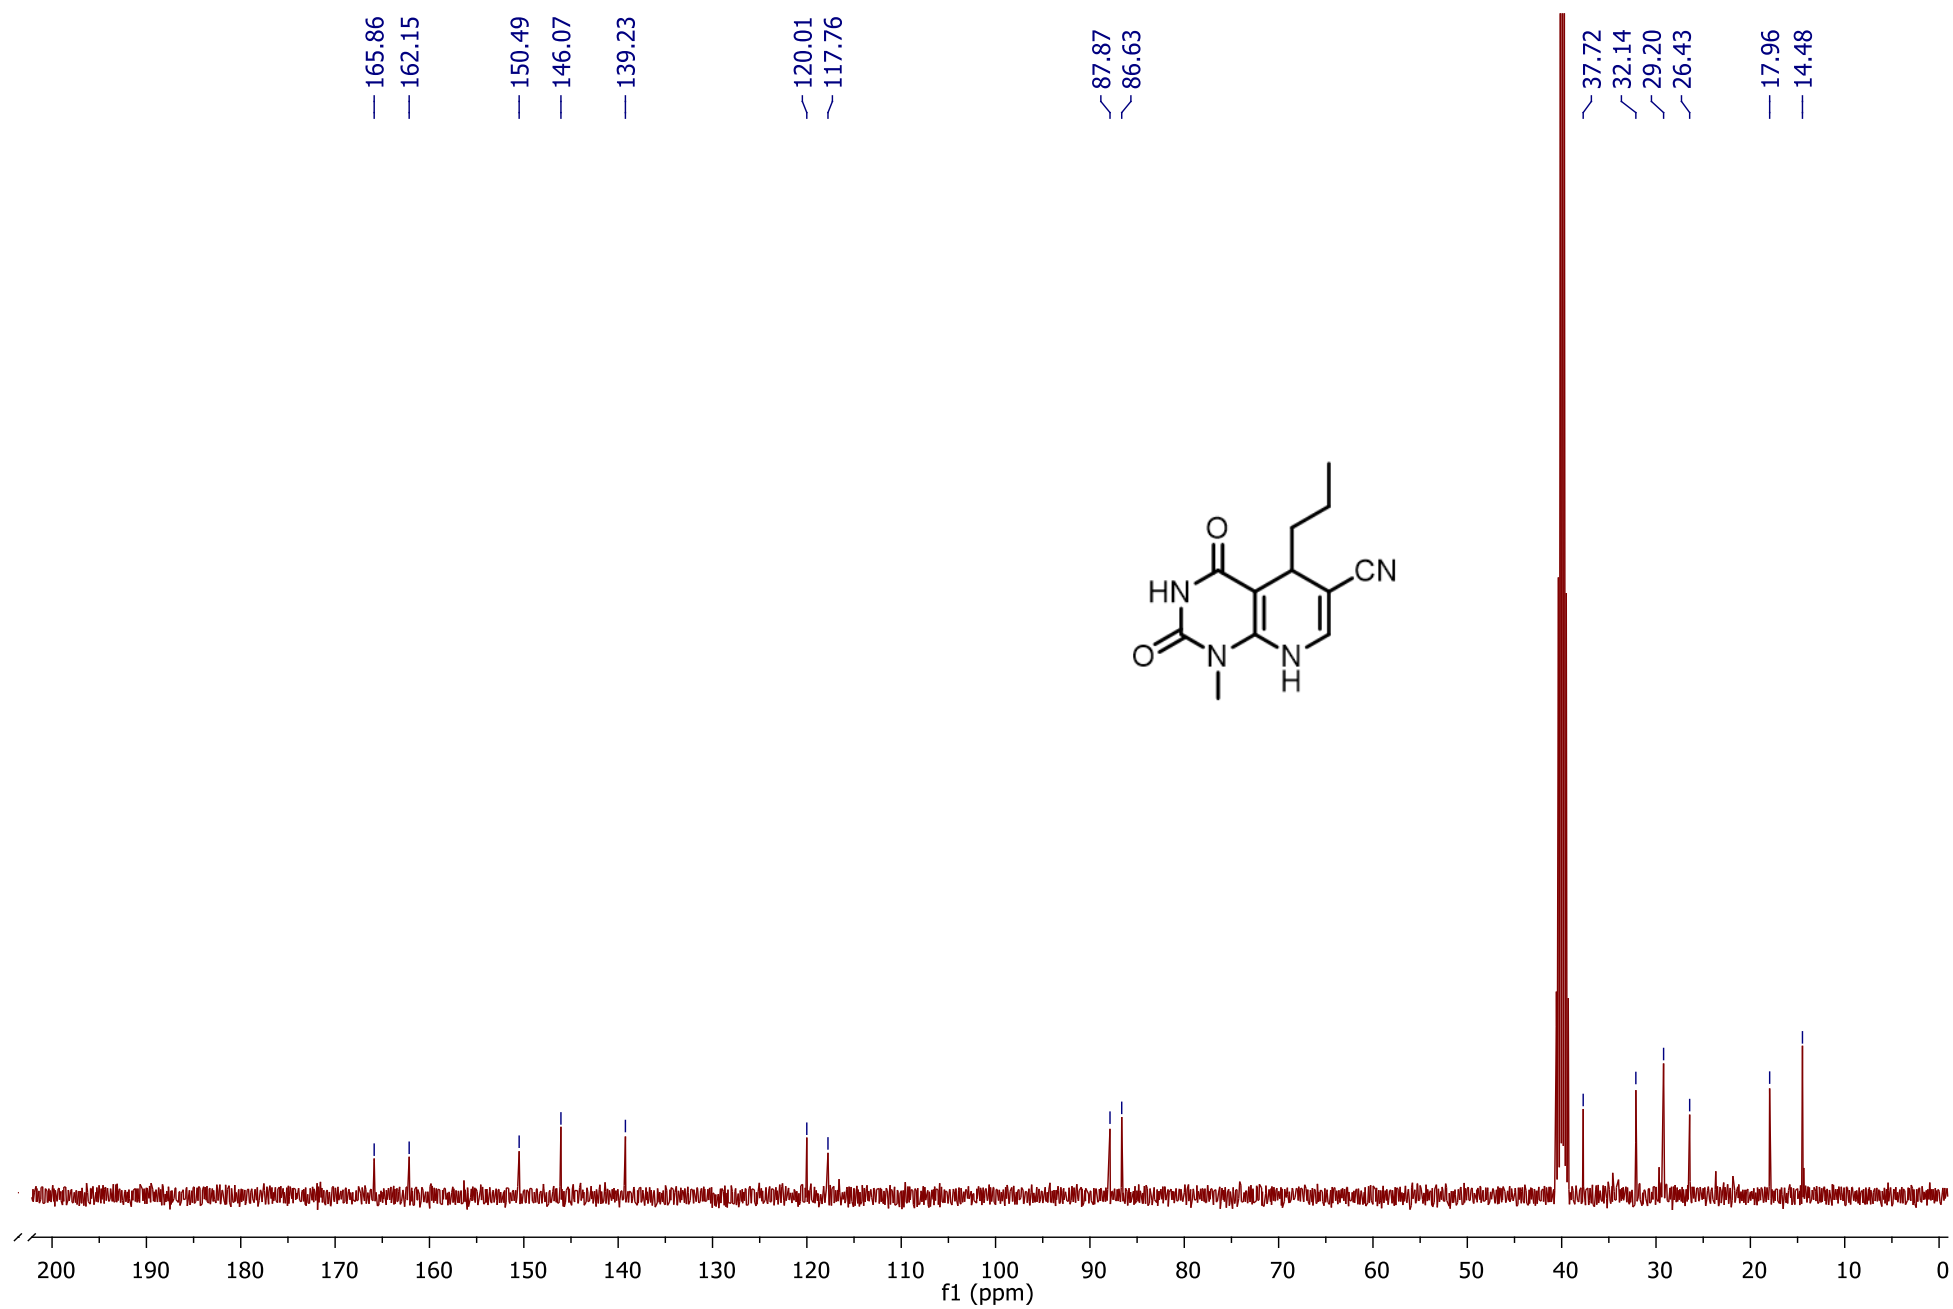

Figure S52.  $^{13}\text{C}$ -NMR (DMSO- $d_6$ ) spectra of compound **4ag**.

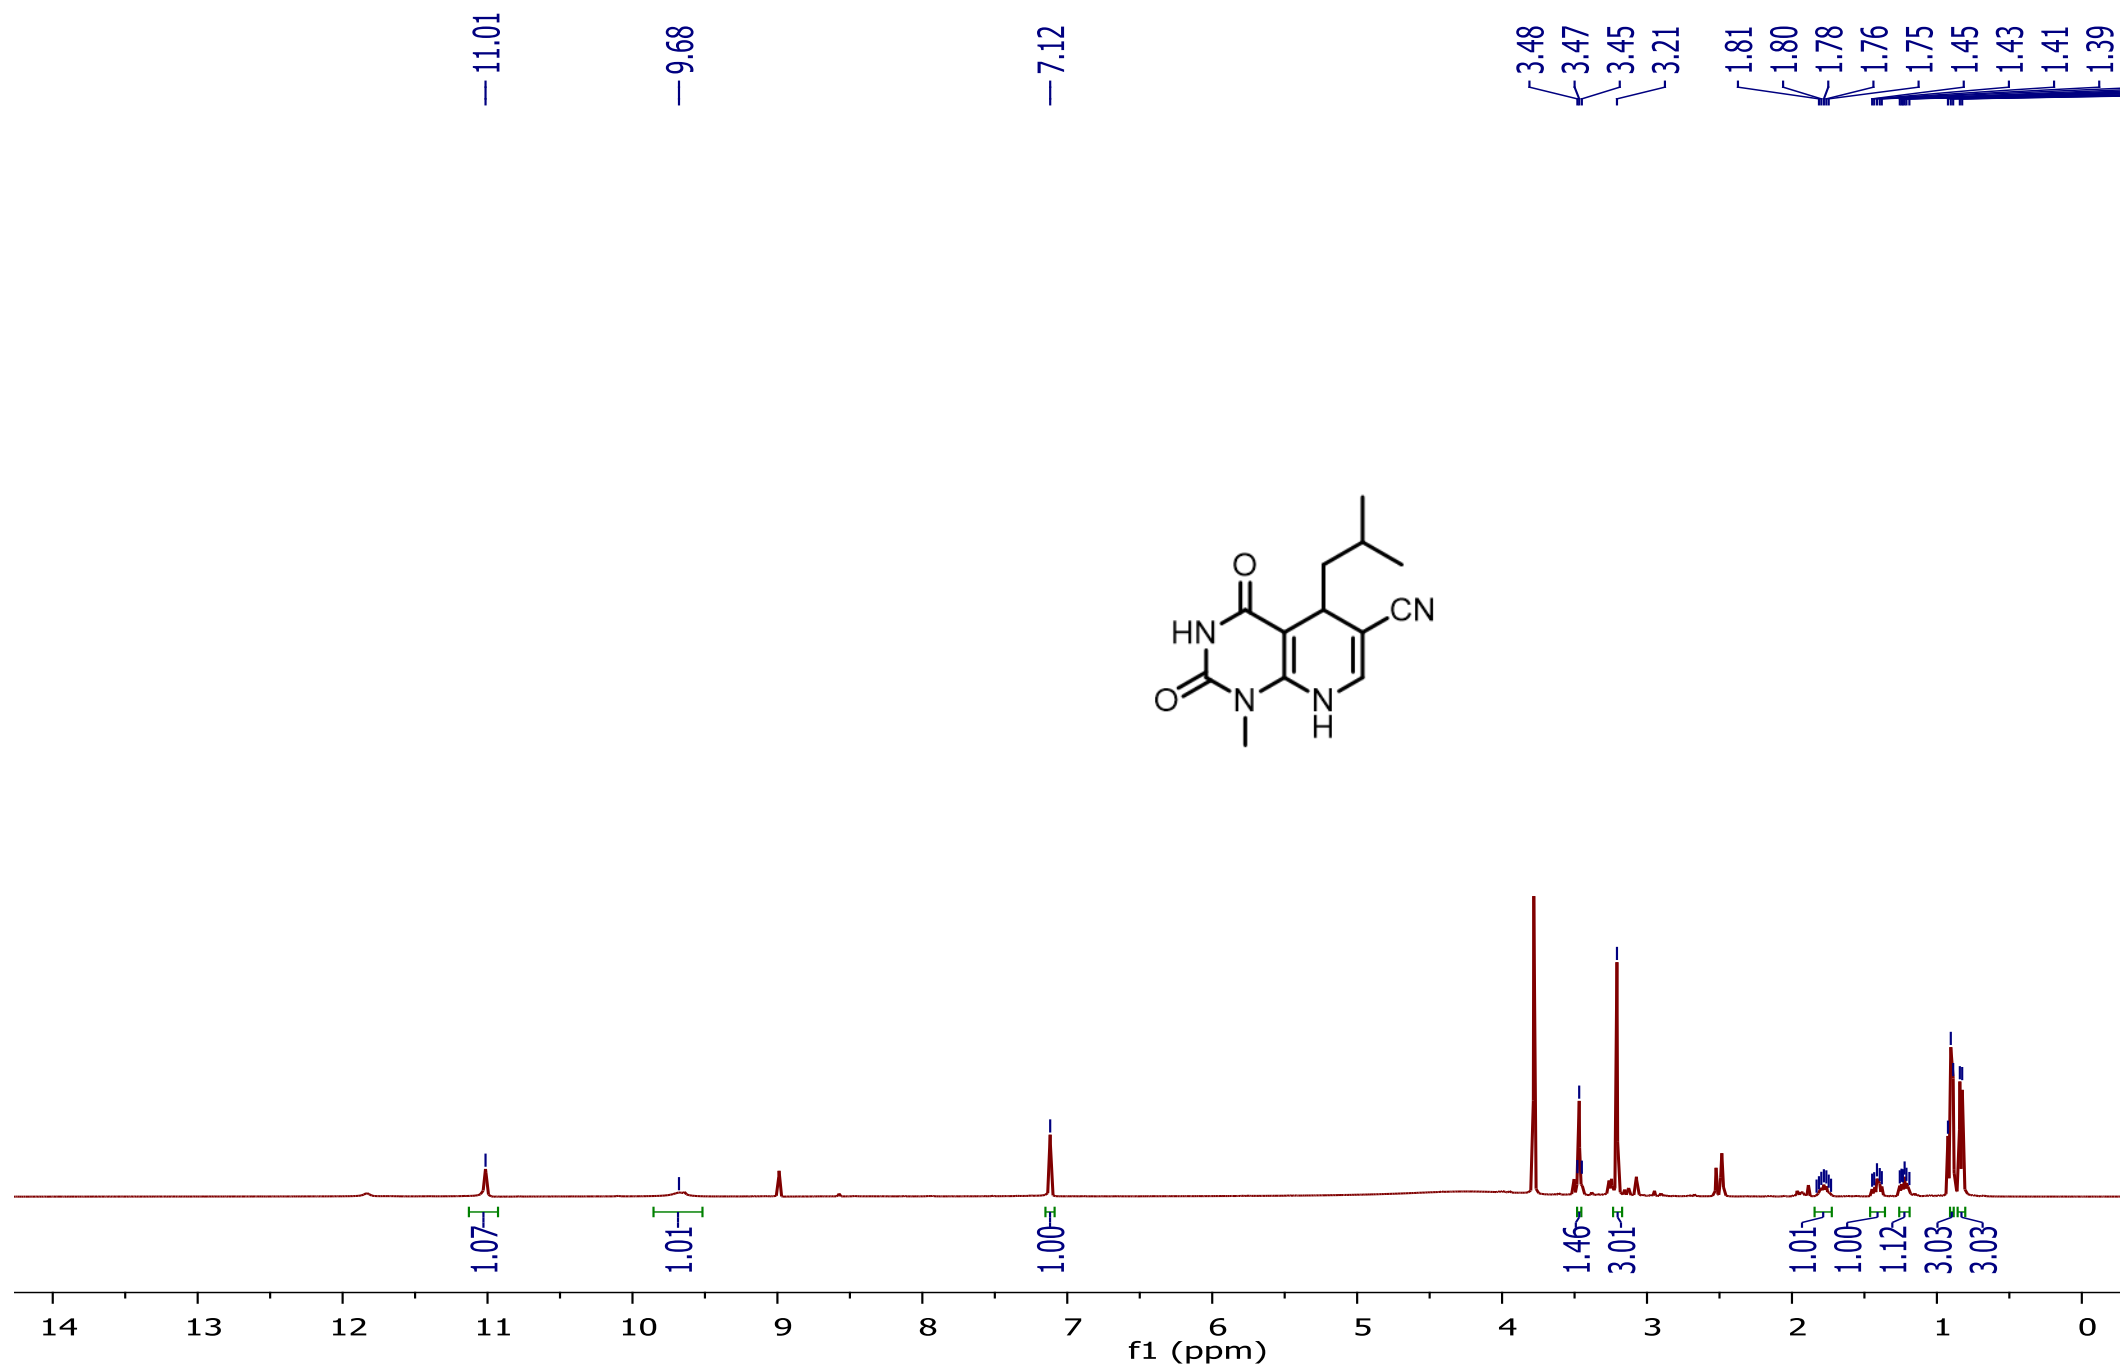

Figure S53. <sup>1</sup>H-NMR (DMSO-d<sub>6</sub>) spectra of compound **4ah**.

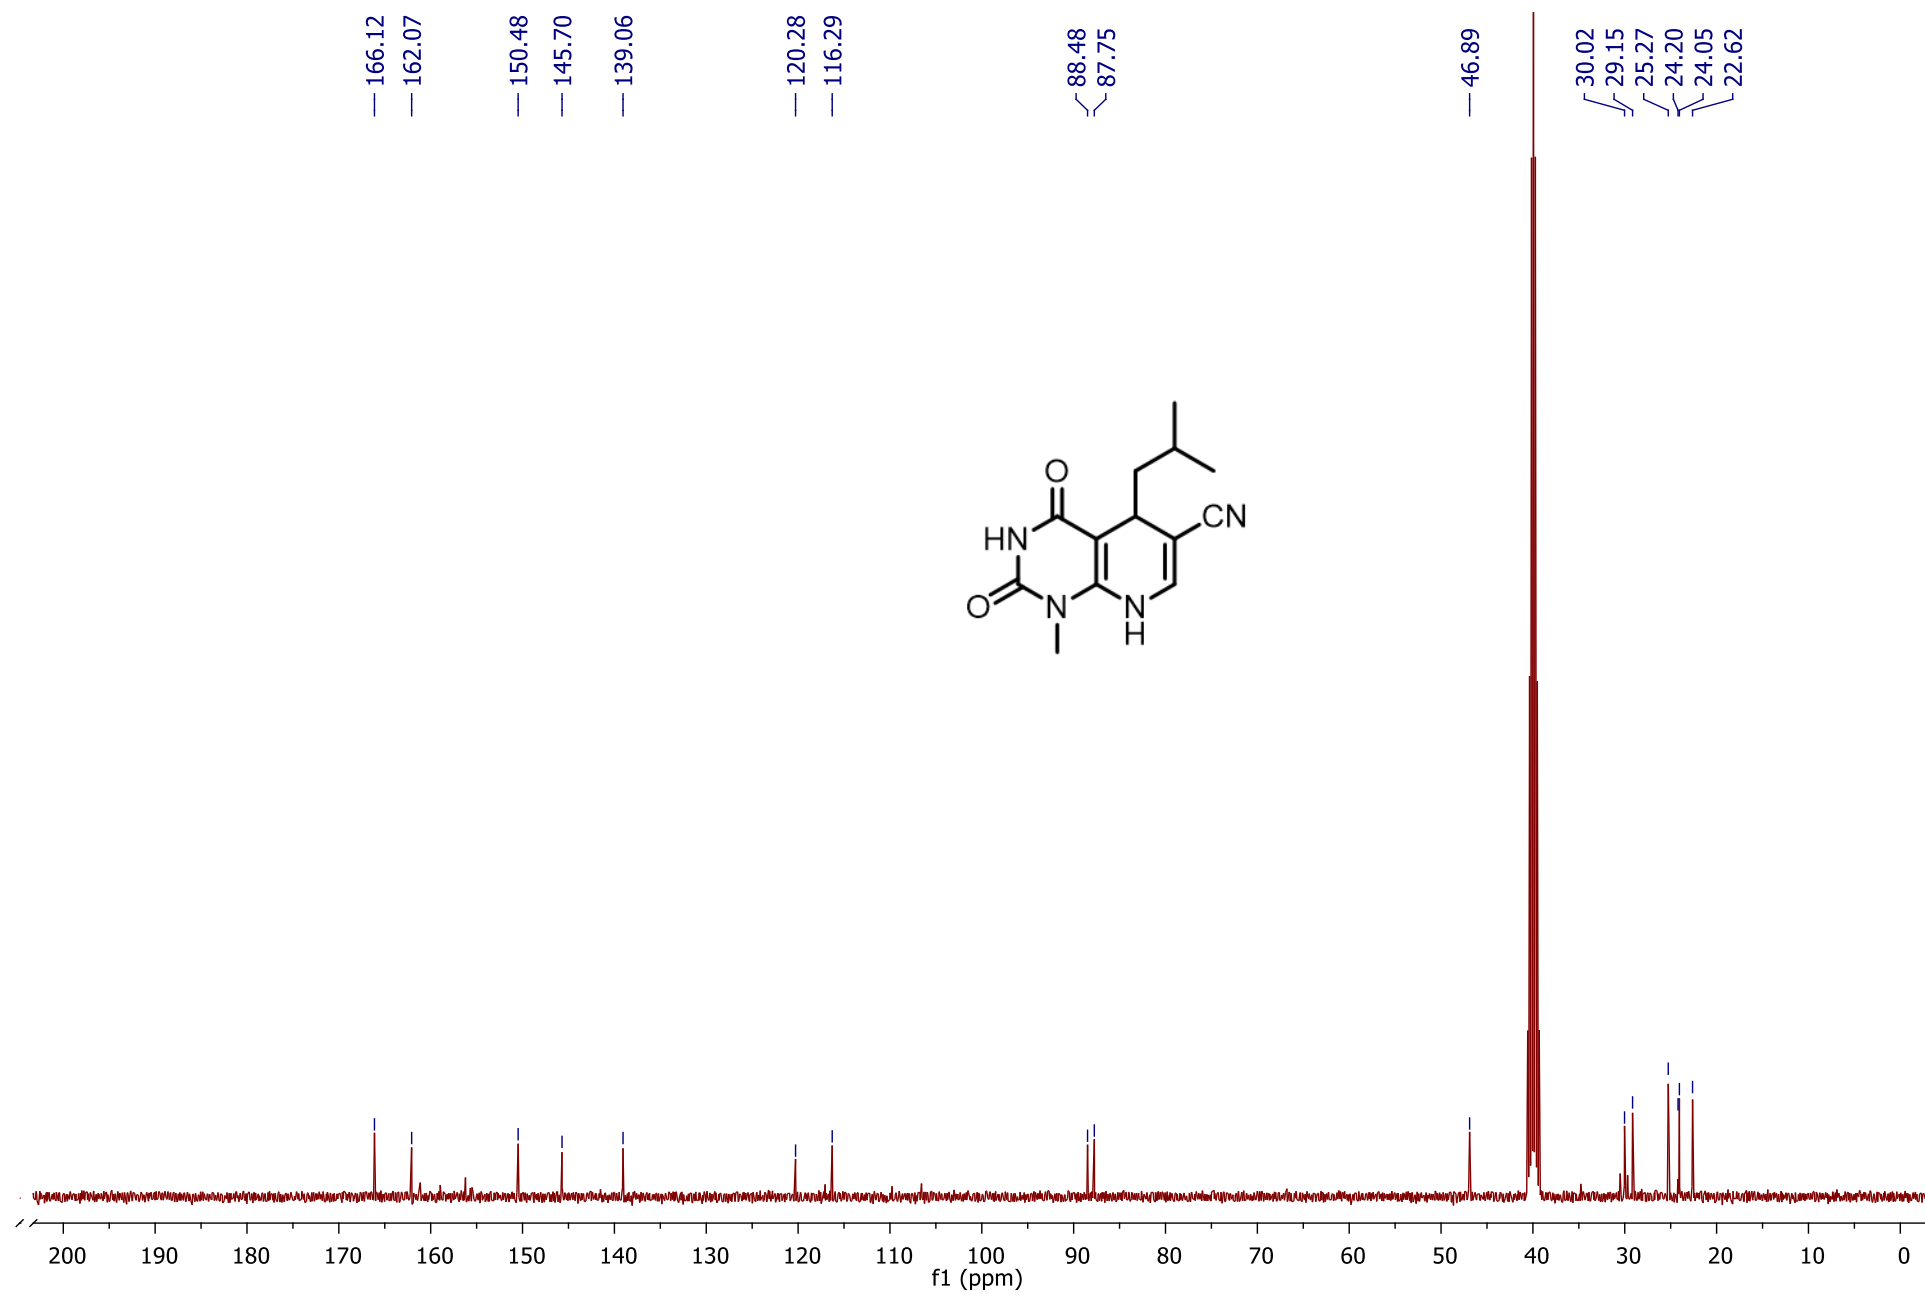

Figure S54.  $^{13}\text{C}$ -NMR (DMSO- $d_6$ ) spectra of compound **4ah**.

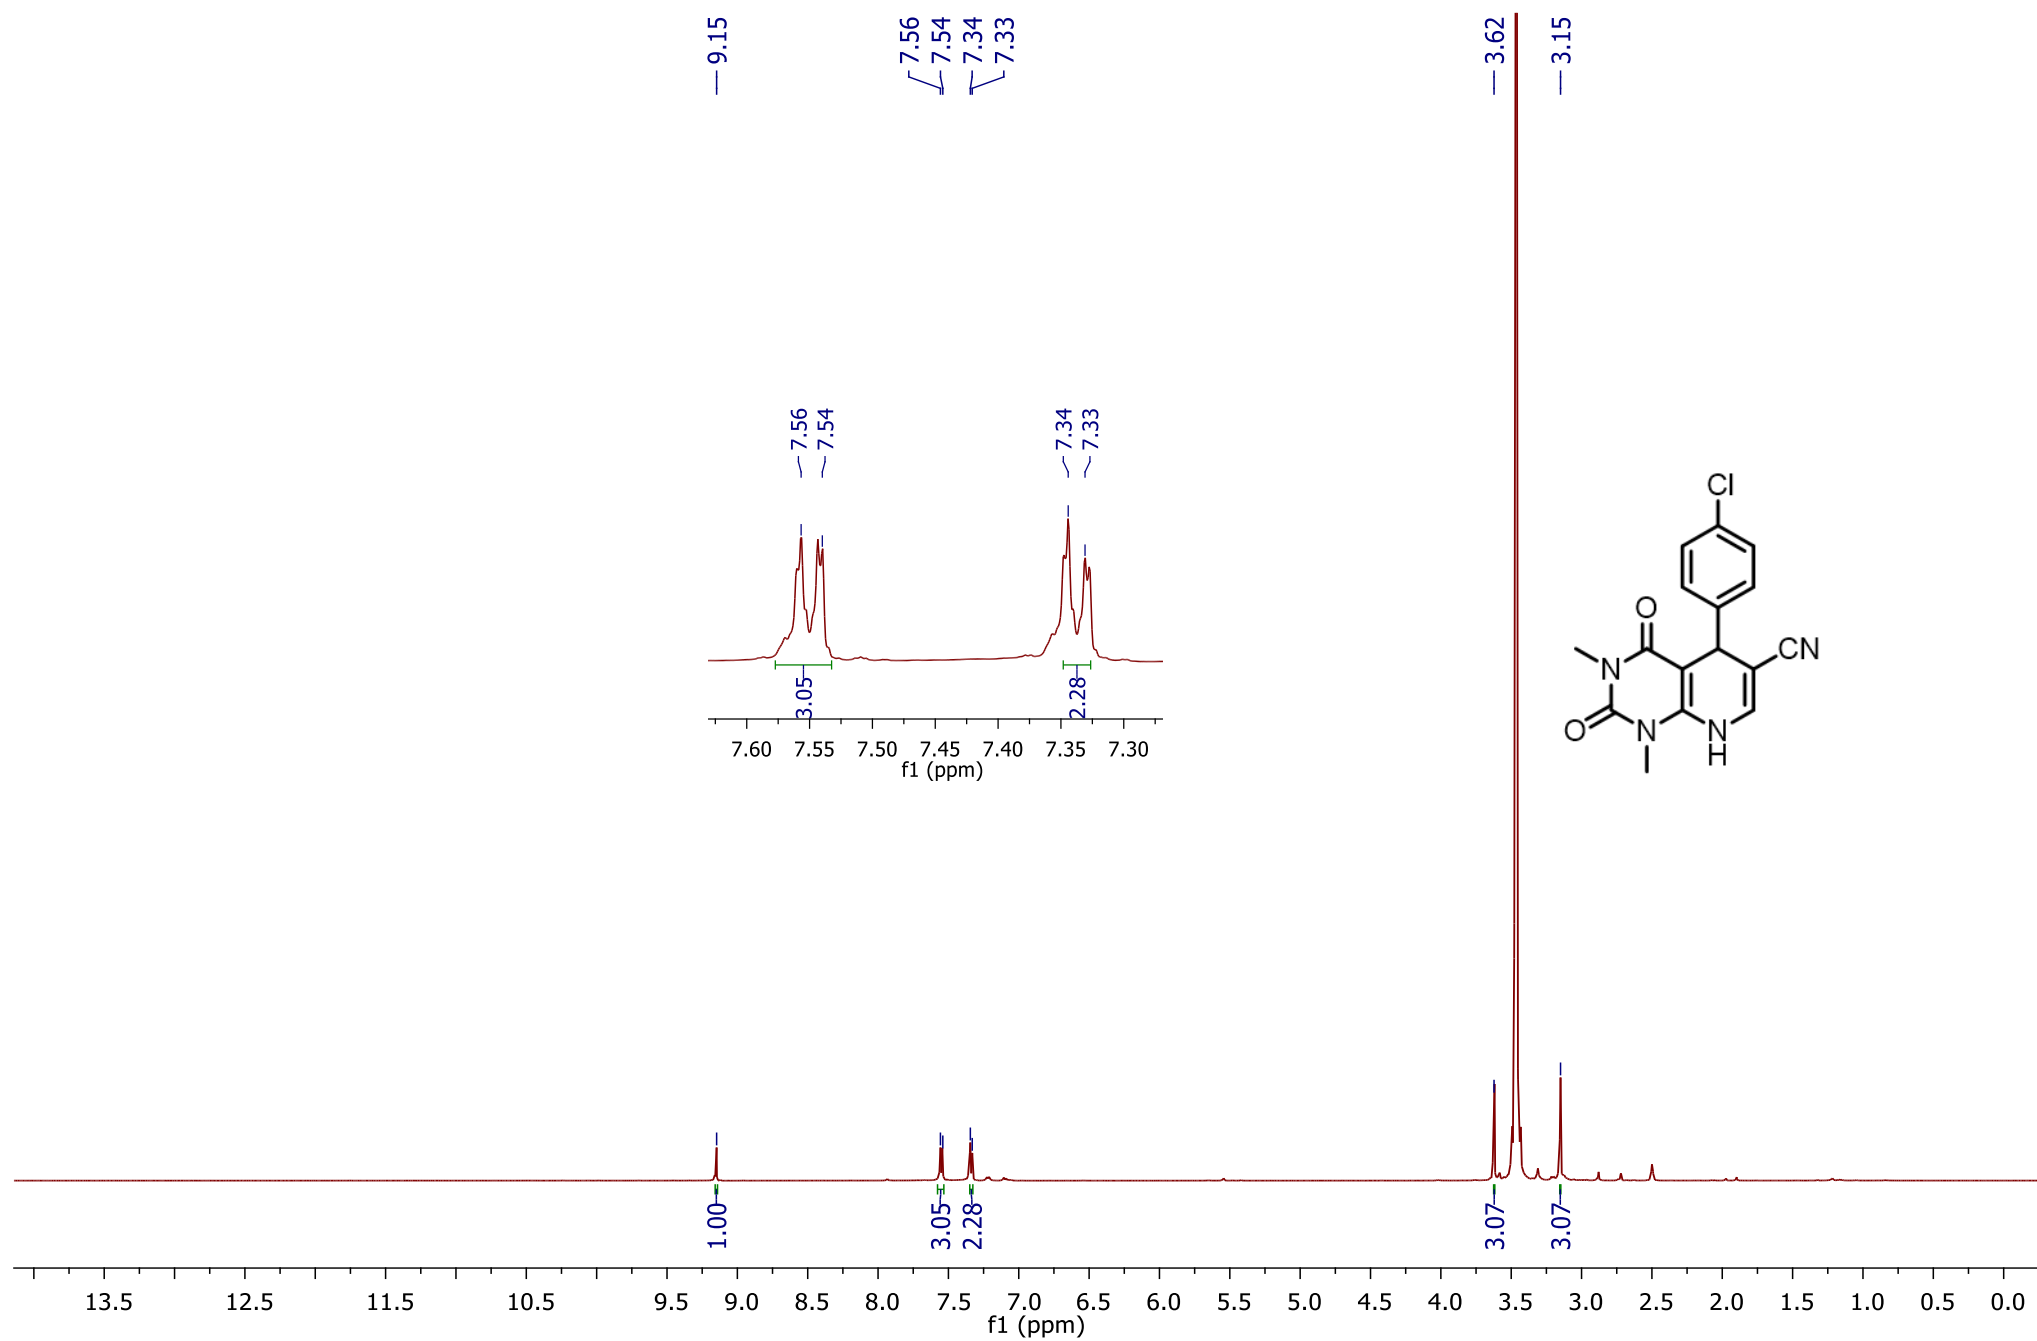

Figure S55. <sup>1</sup>H-NMR (DMSO-d<sub>6</sub>) spectra of compound **4ba**.

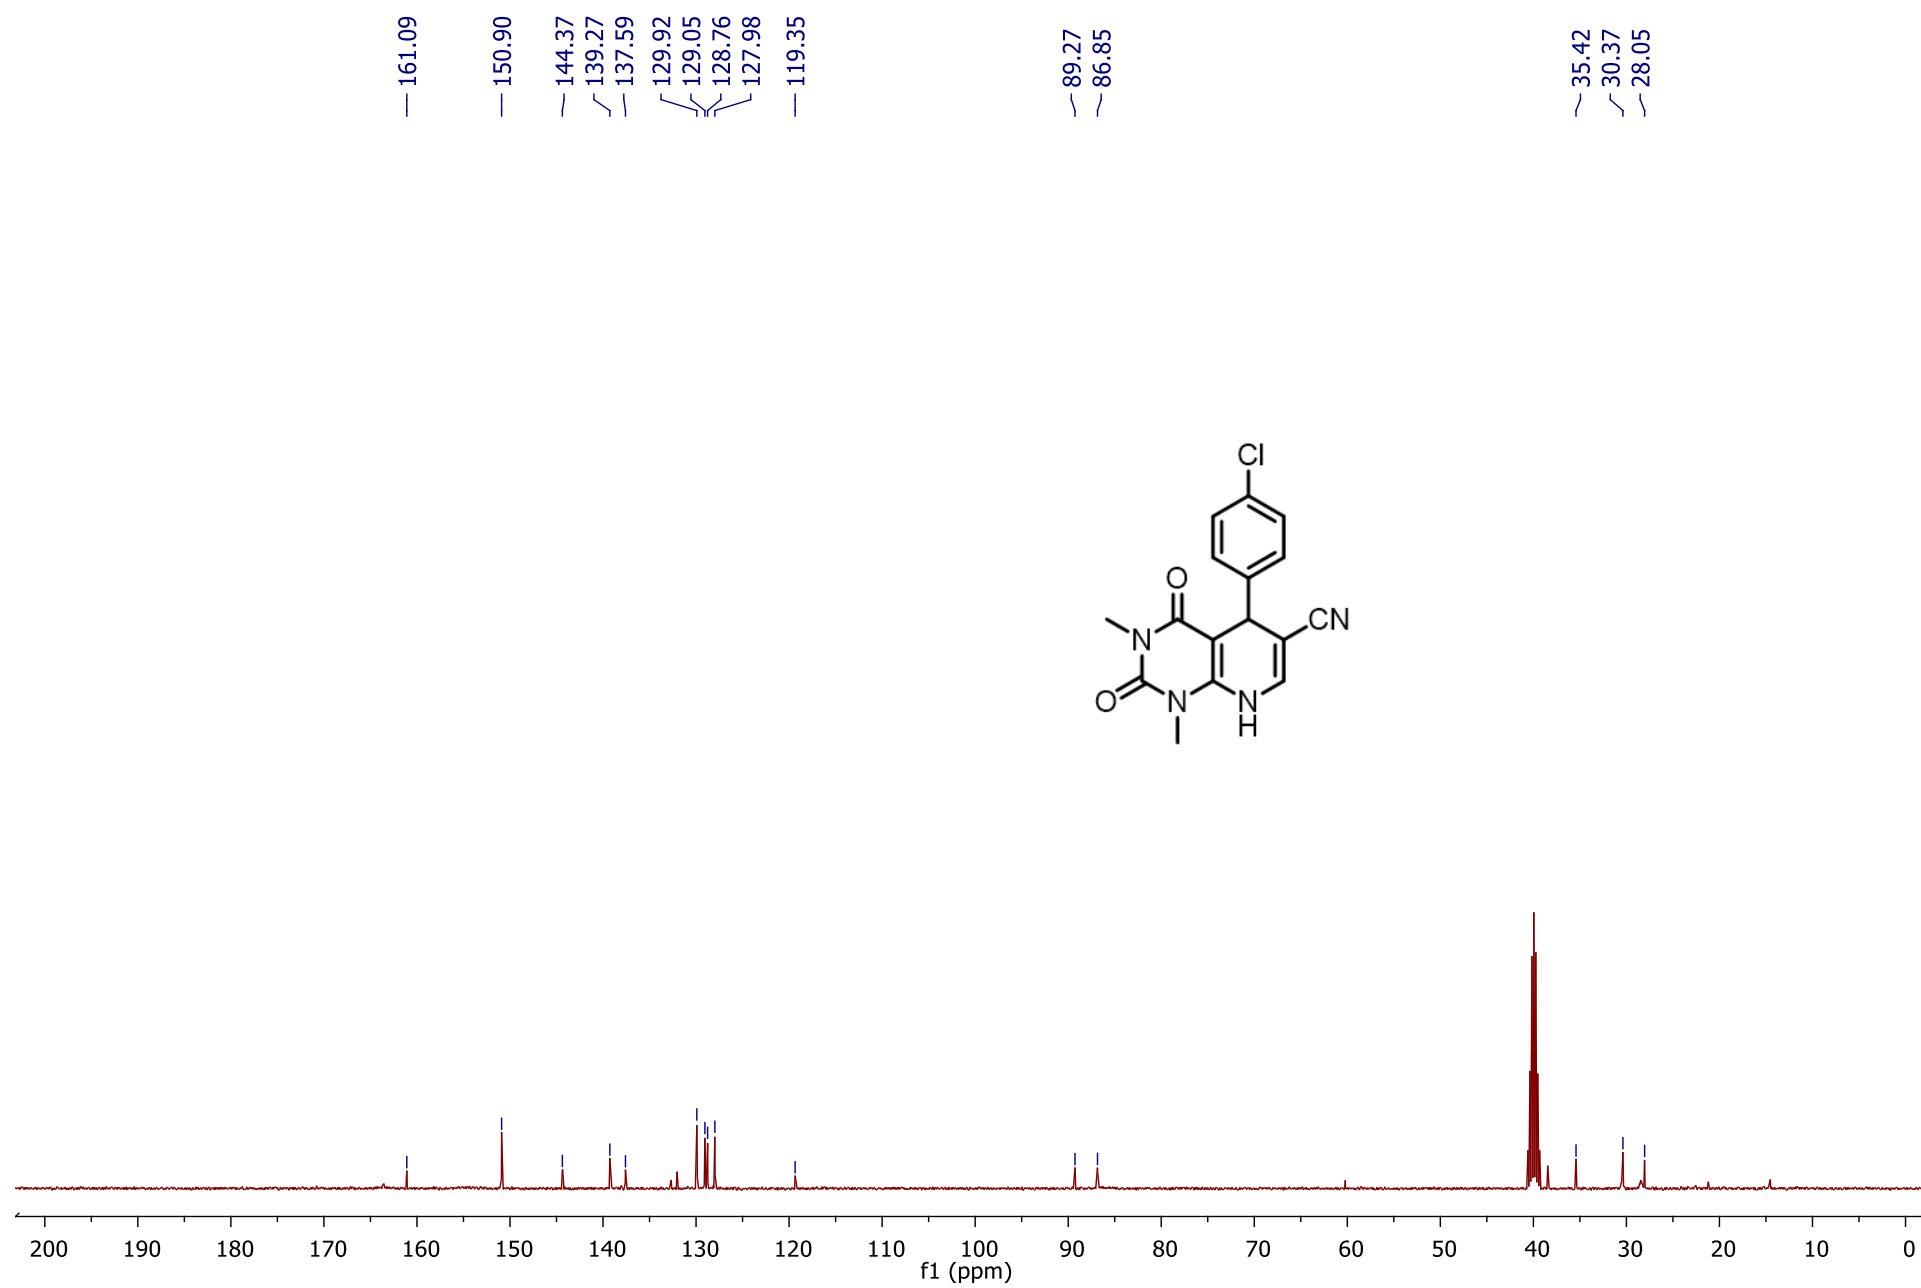

**Figure S56.** <sup>13</sup>C-NMR (DMSO-d<sub>6</sub>) spectra of compound **4ba**.

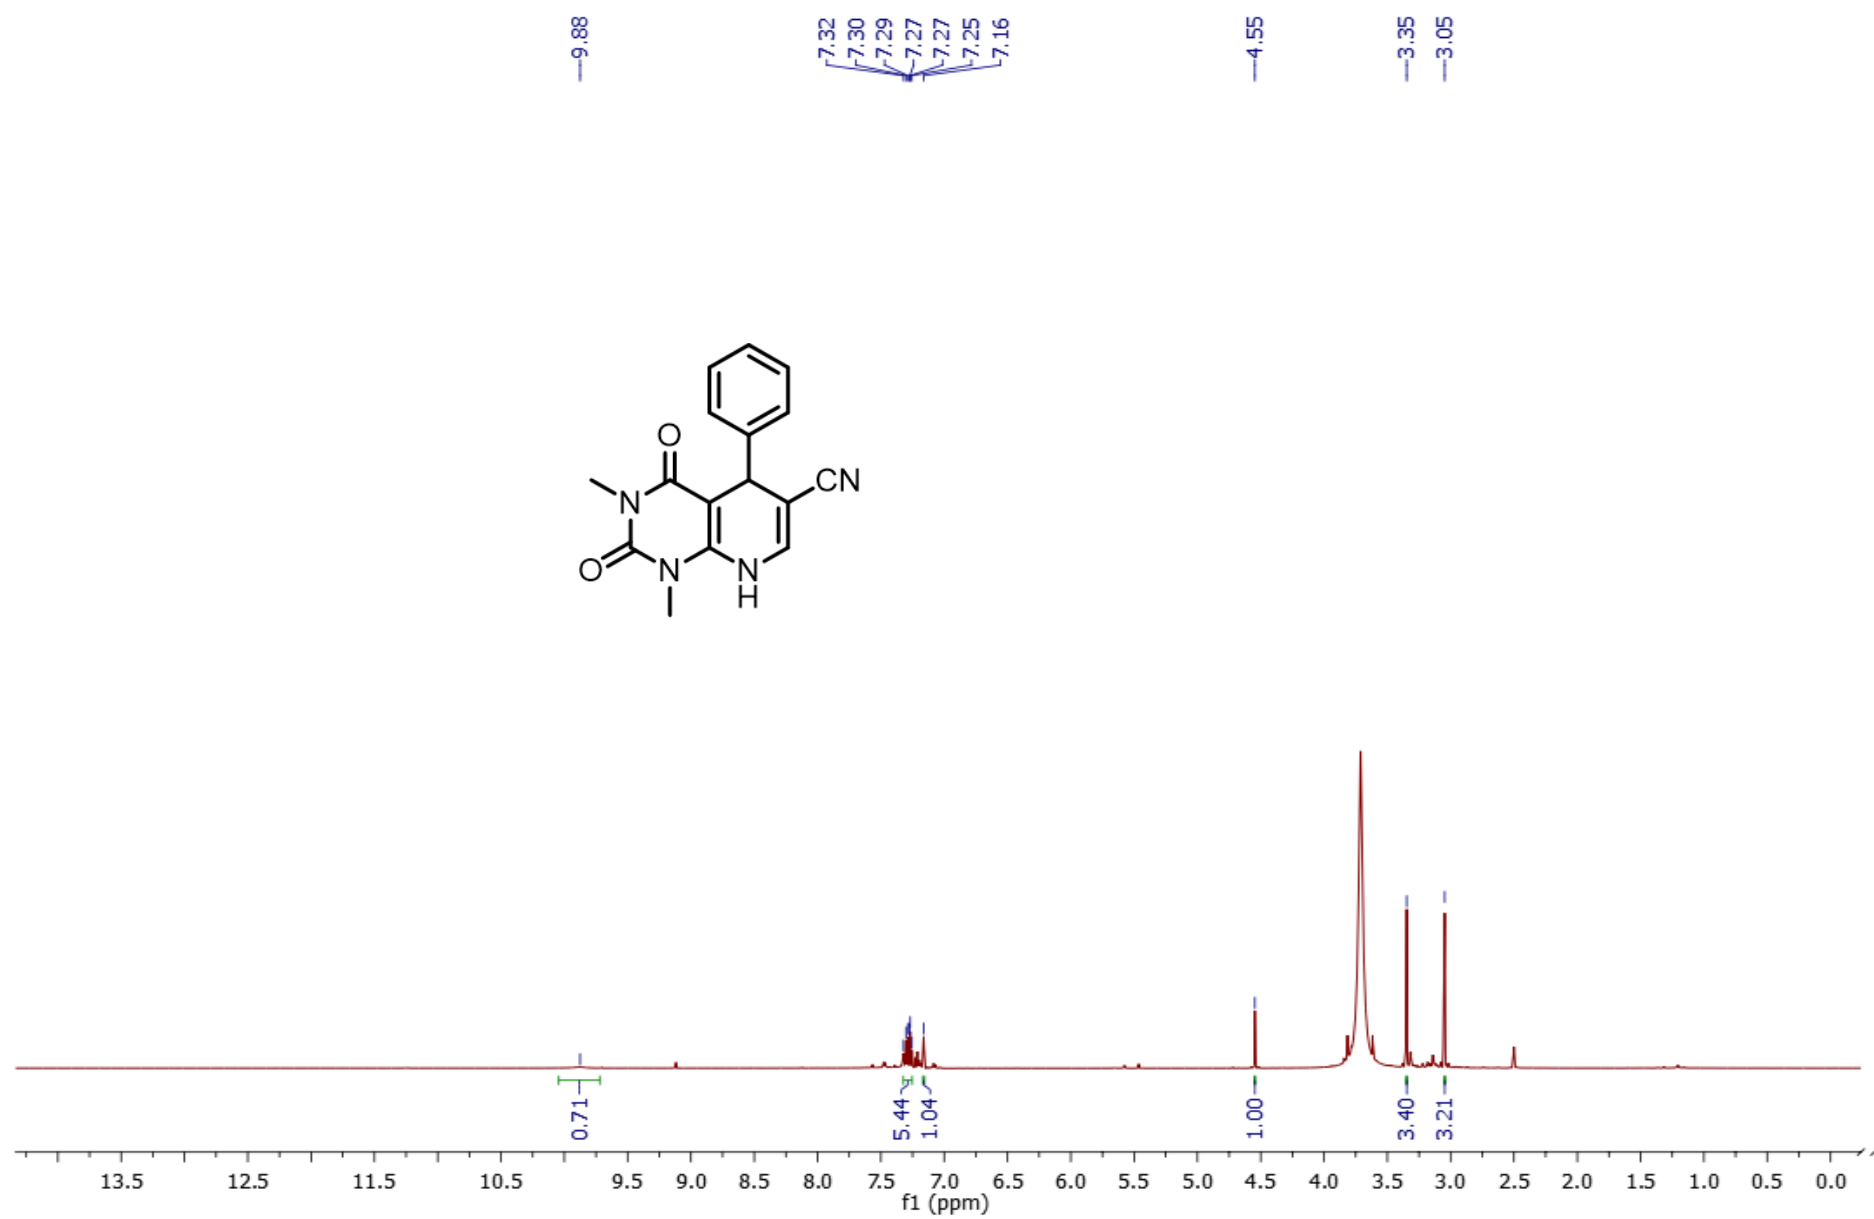

**Figure S57.** <sup>1</sup>H-NMR (DMSO-d<sub>6</sub>) spectra of compound **4bb**.

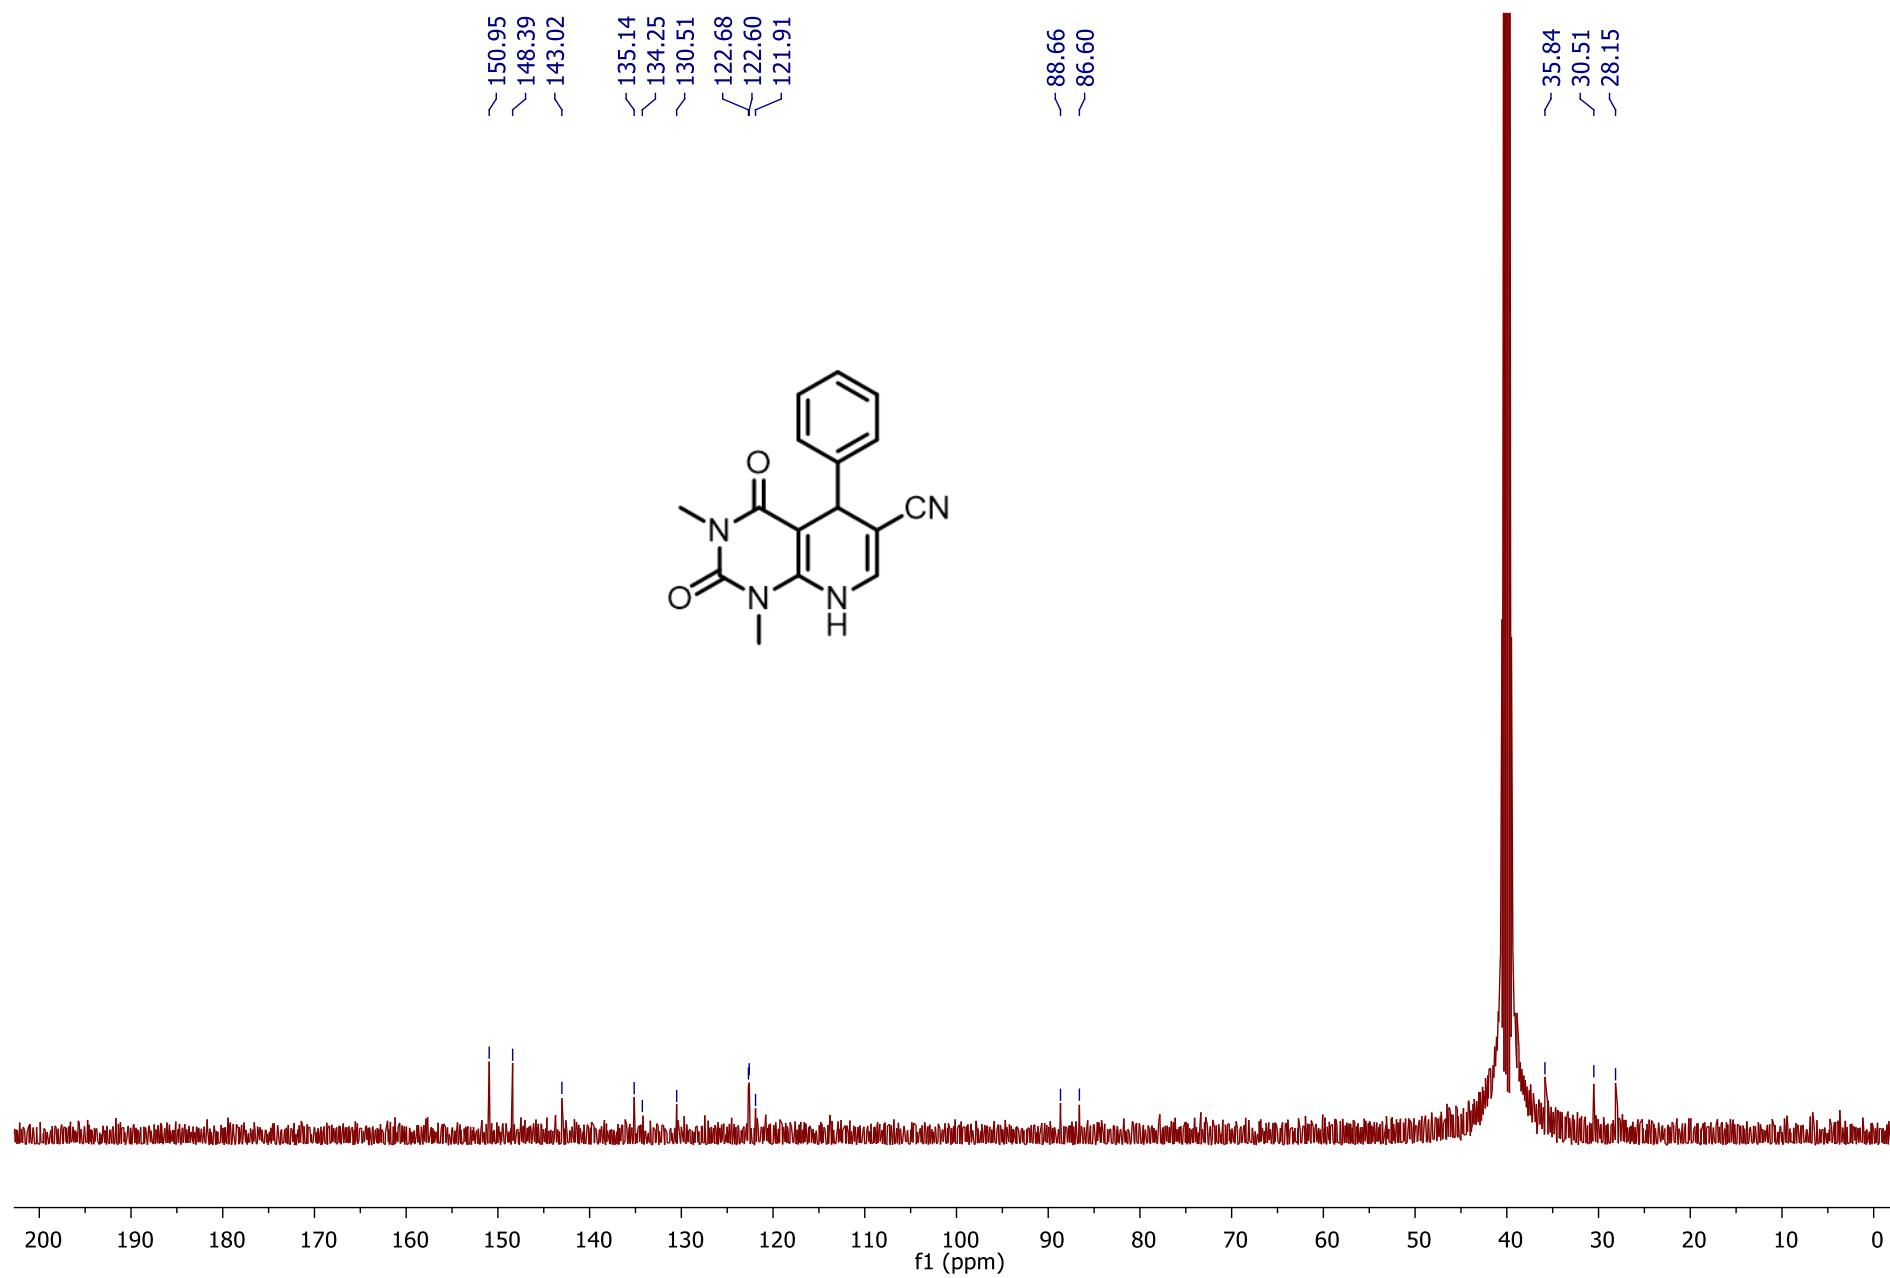

Figure S58. <sup>13</sup>C-NMR (DMSO-d<sub>6</sub>) spectra of compound **4bb**.

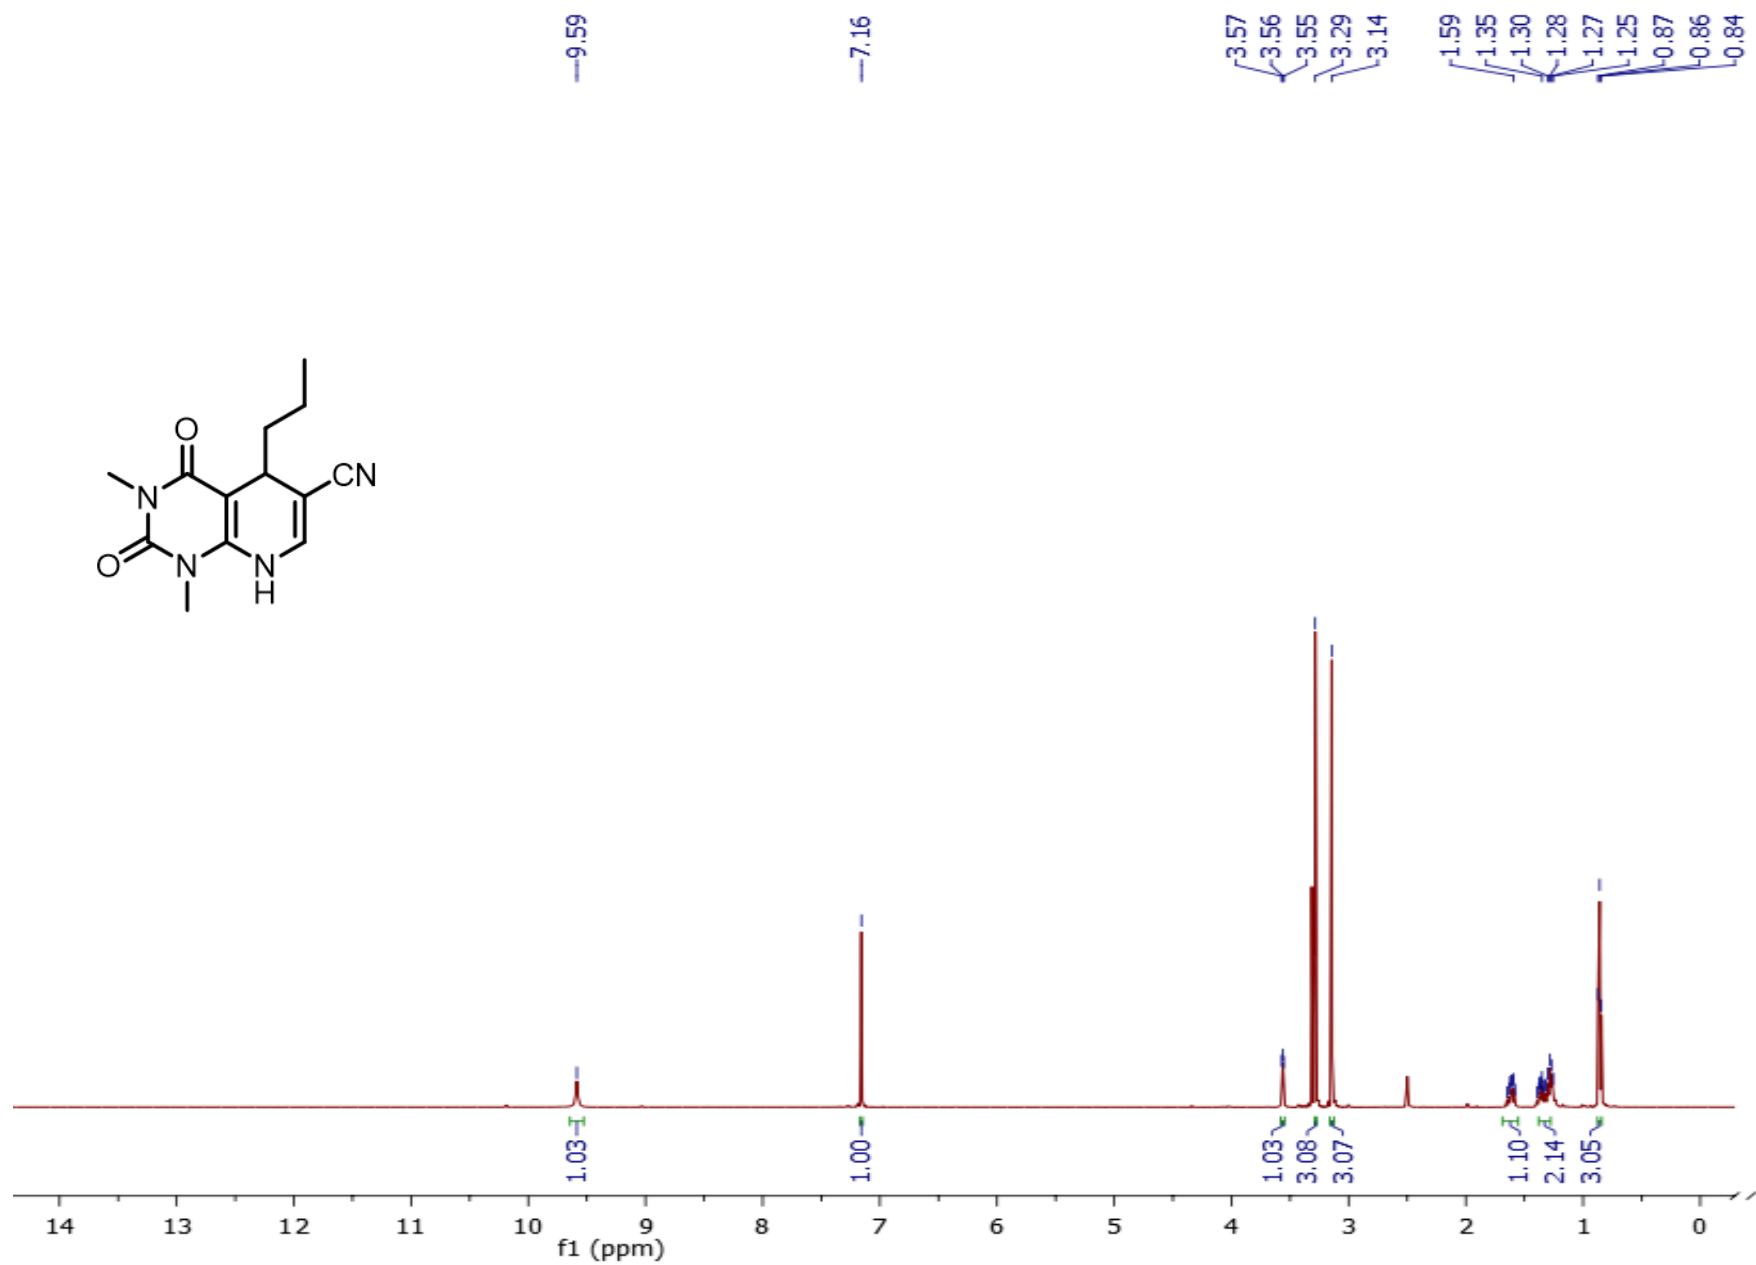

Figure S59. <sup>1</sup>H-NMR (DMSO-d<sub>6</sub>) spectra of compound **4bc**.

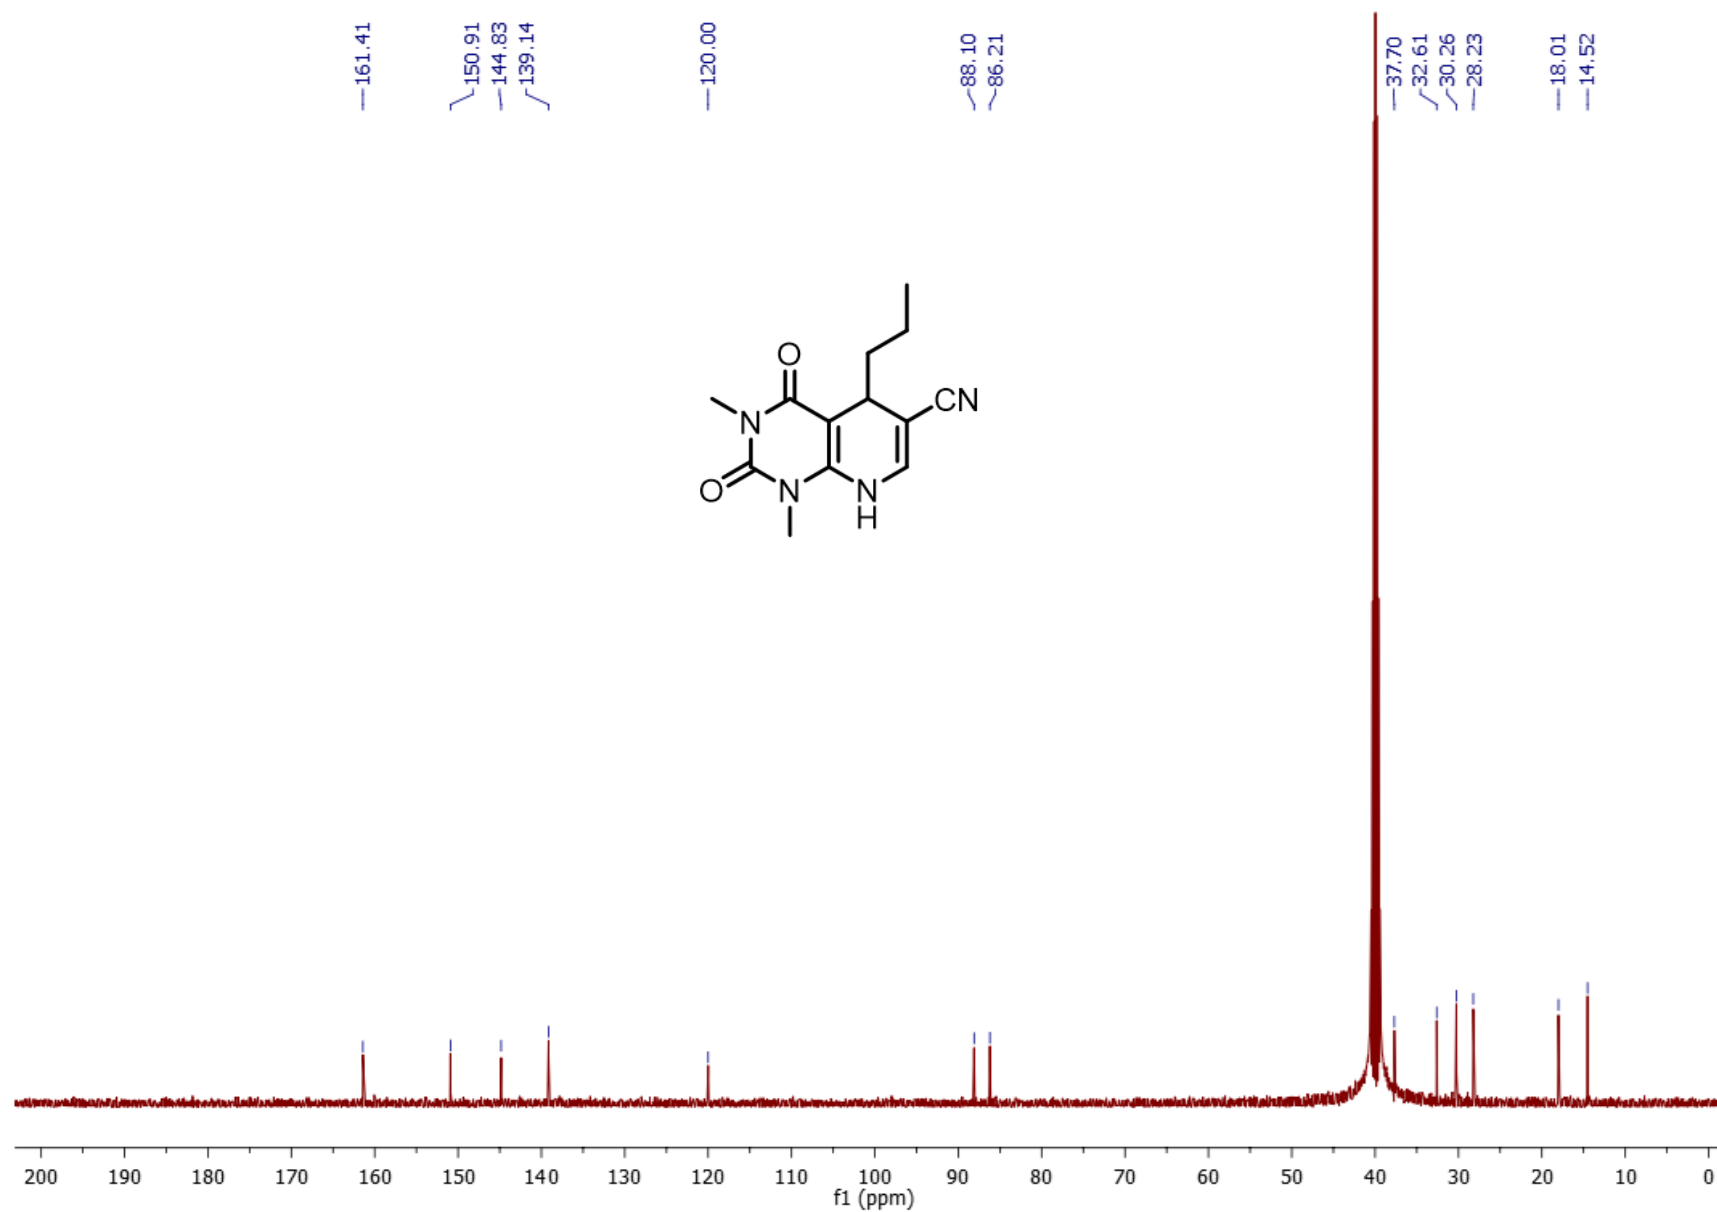

**Figure S60.**  $^{13}\text{C}$ -NMR (DMSO- $d_6$ ) spectra of compound **4bc**.

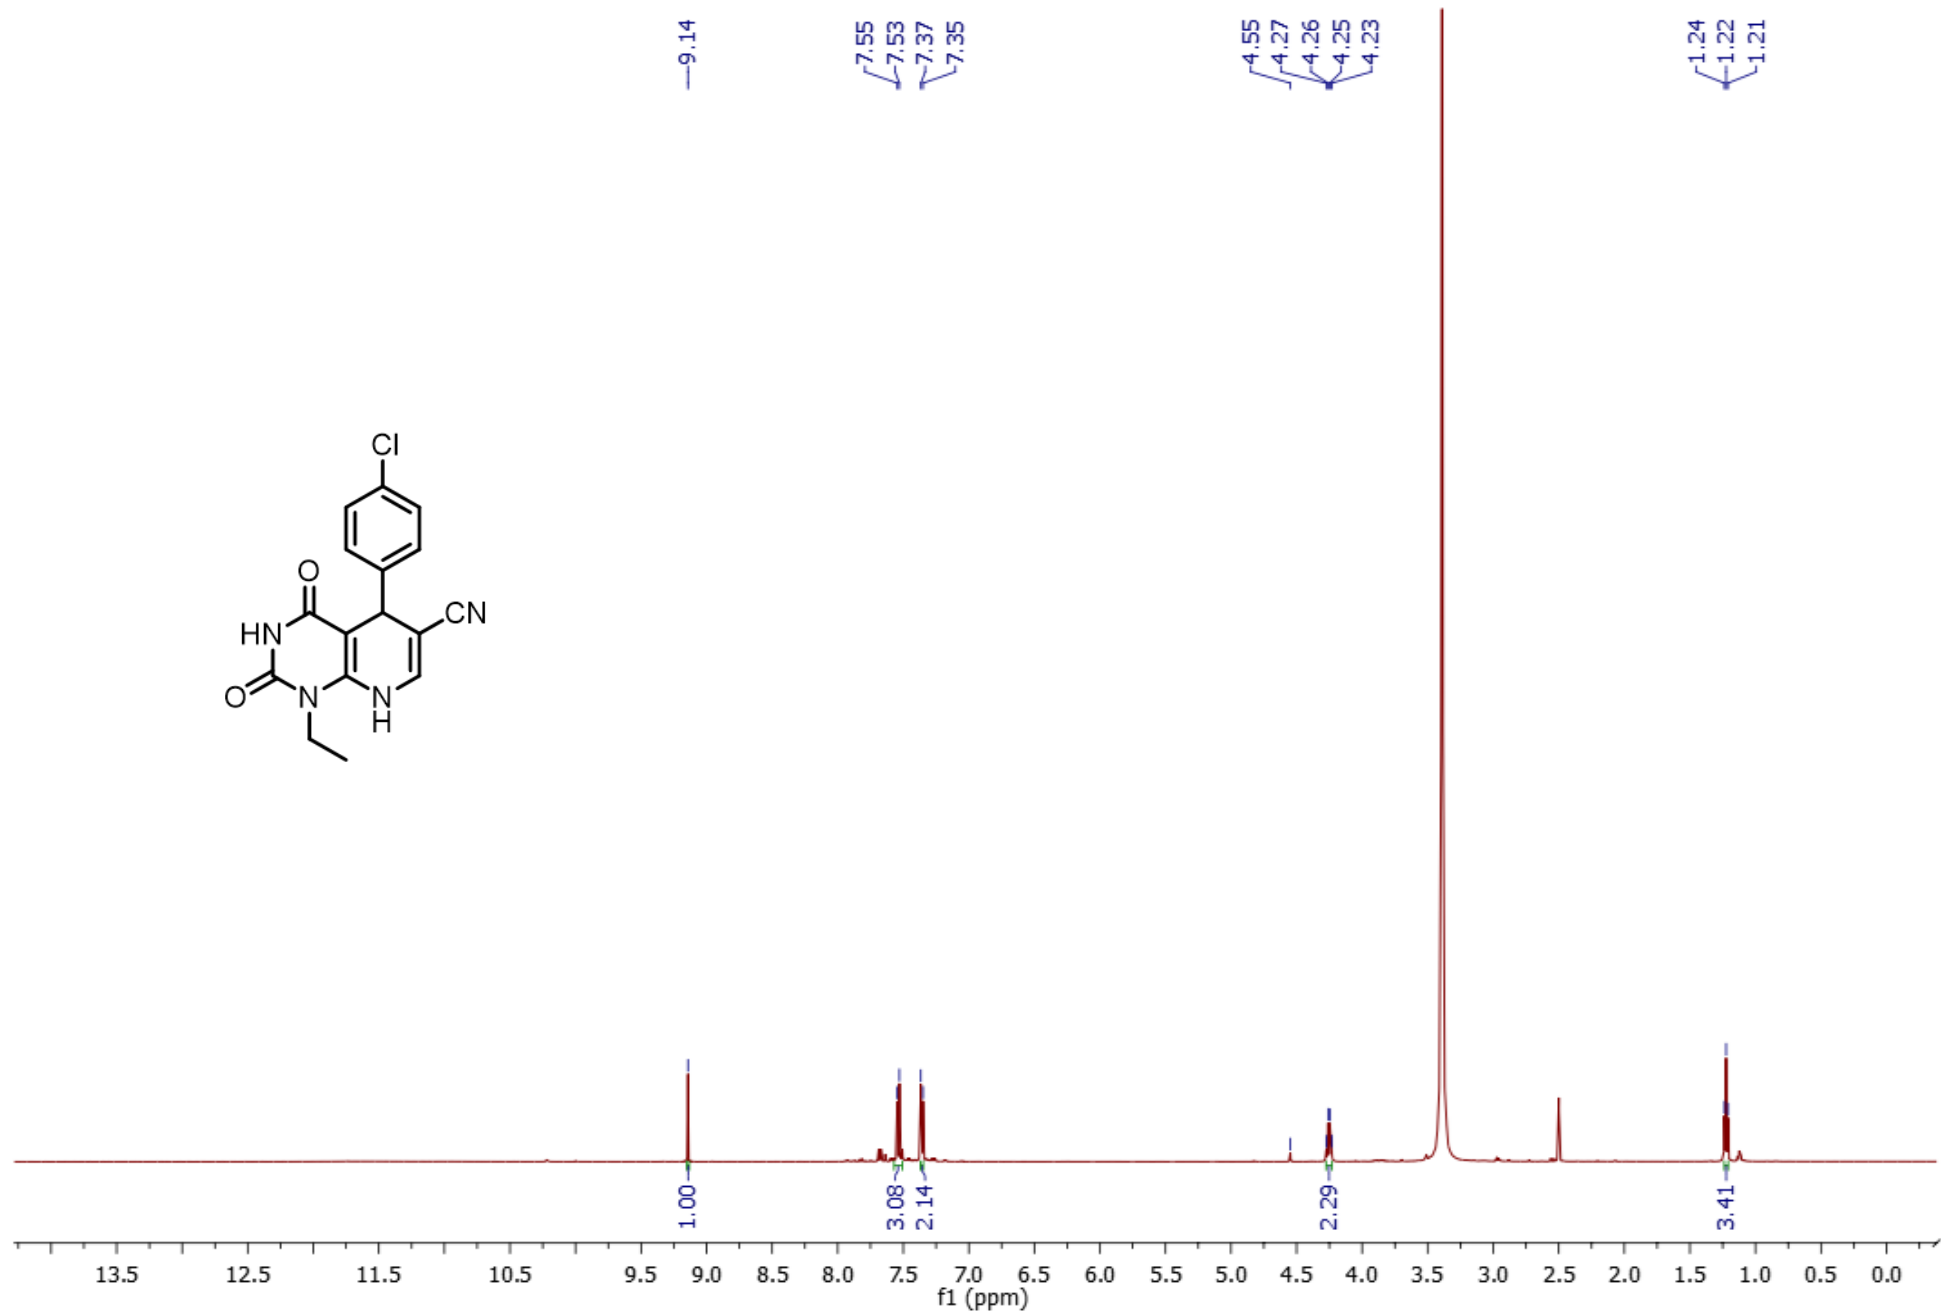

Figure S61. <sup>1</sup>H-NMR (DMSO-d<sub>6</sub>) spectra of compound **4ca**.

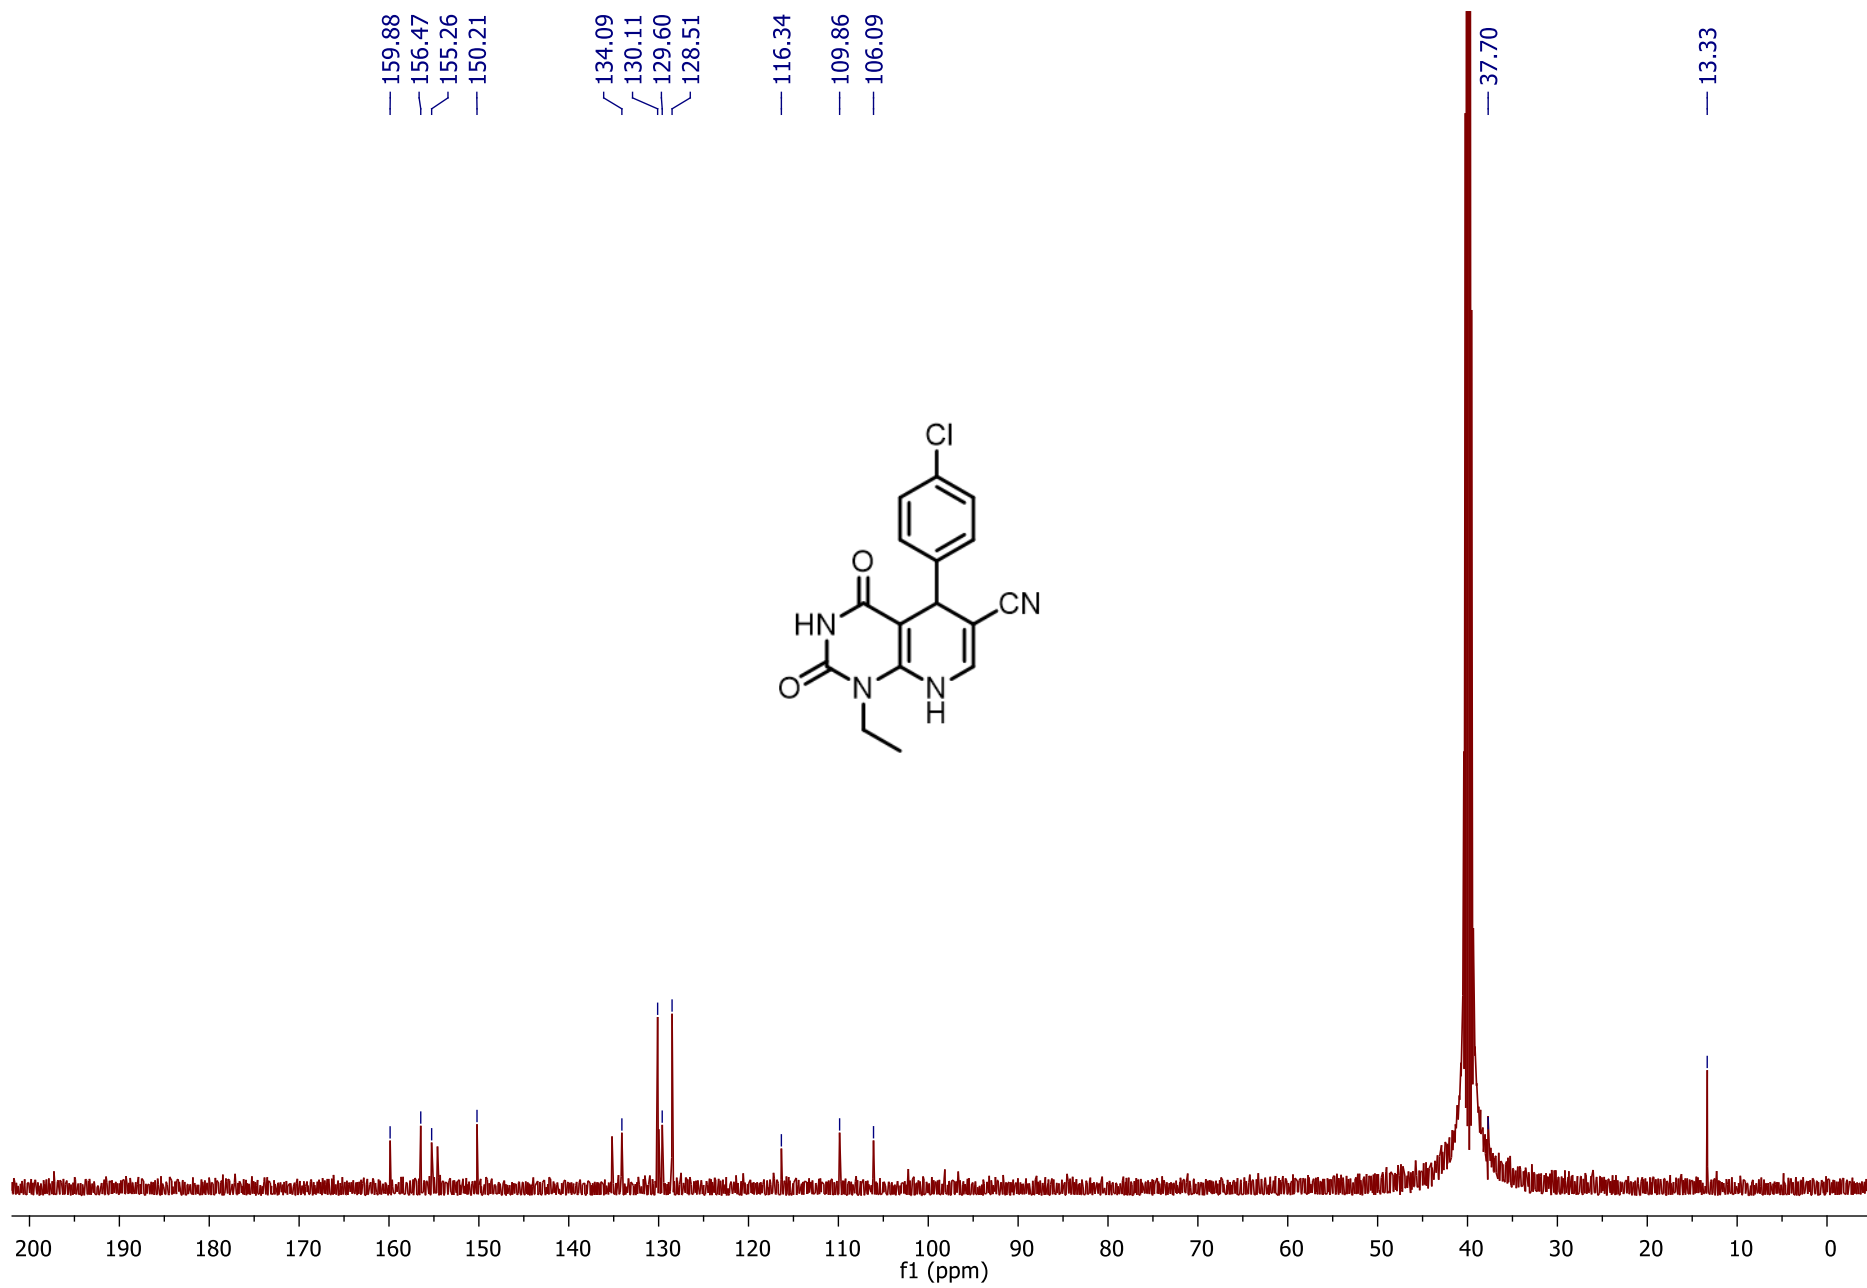

Figure S62. <sup>13</sup>C-NMR (DMSO-d<sub>6</sub>) spectra of compound **4ca**.

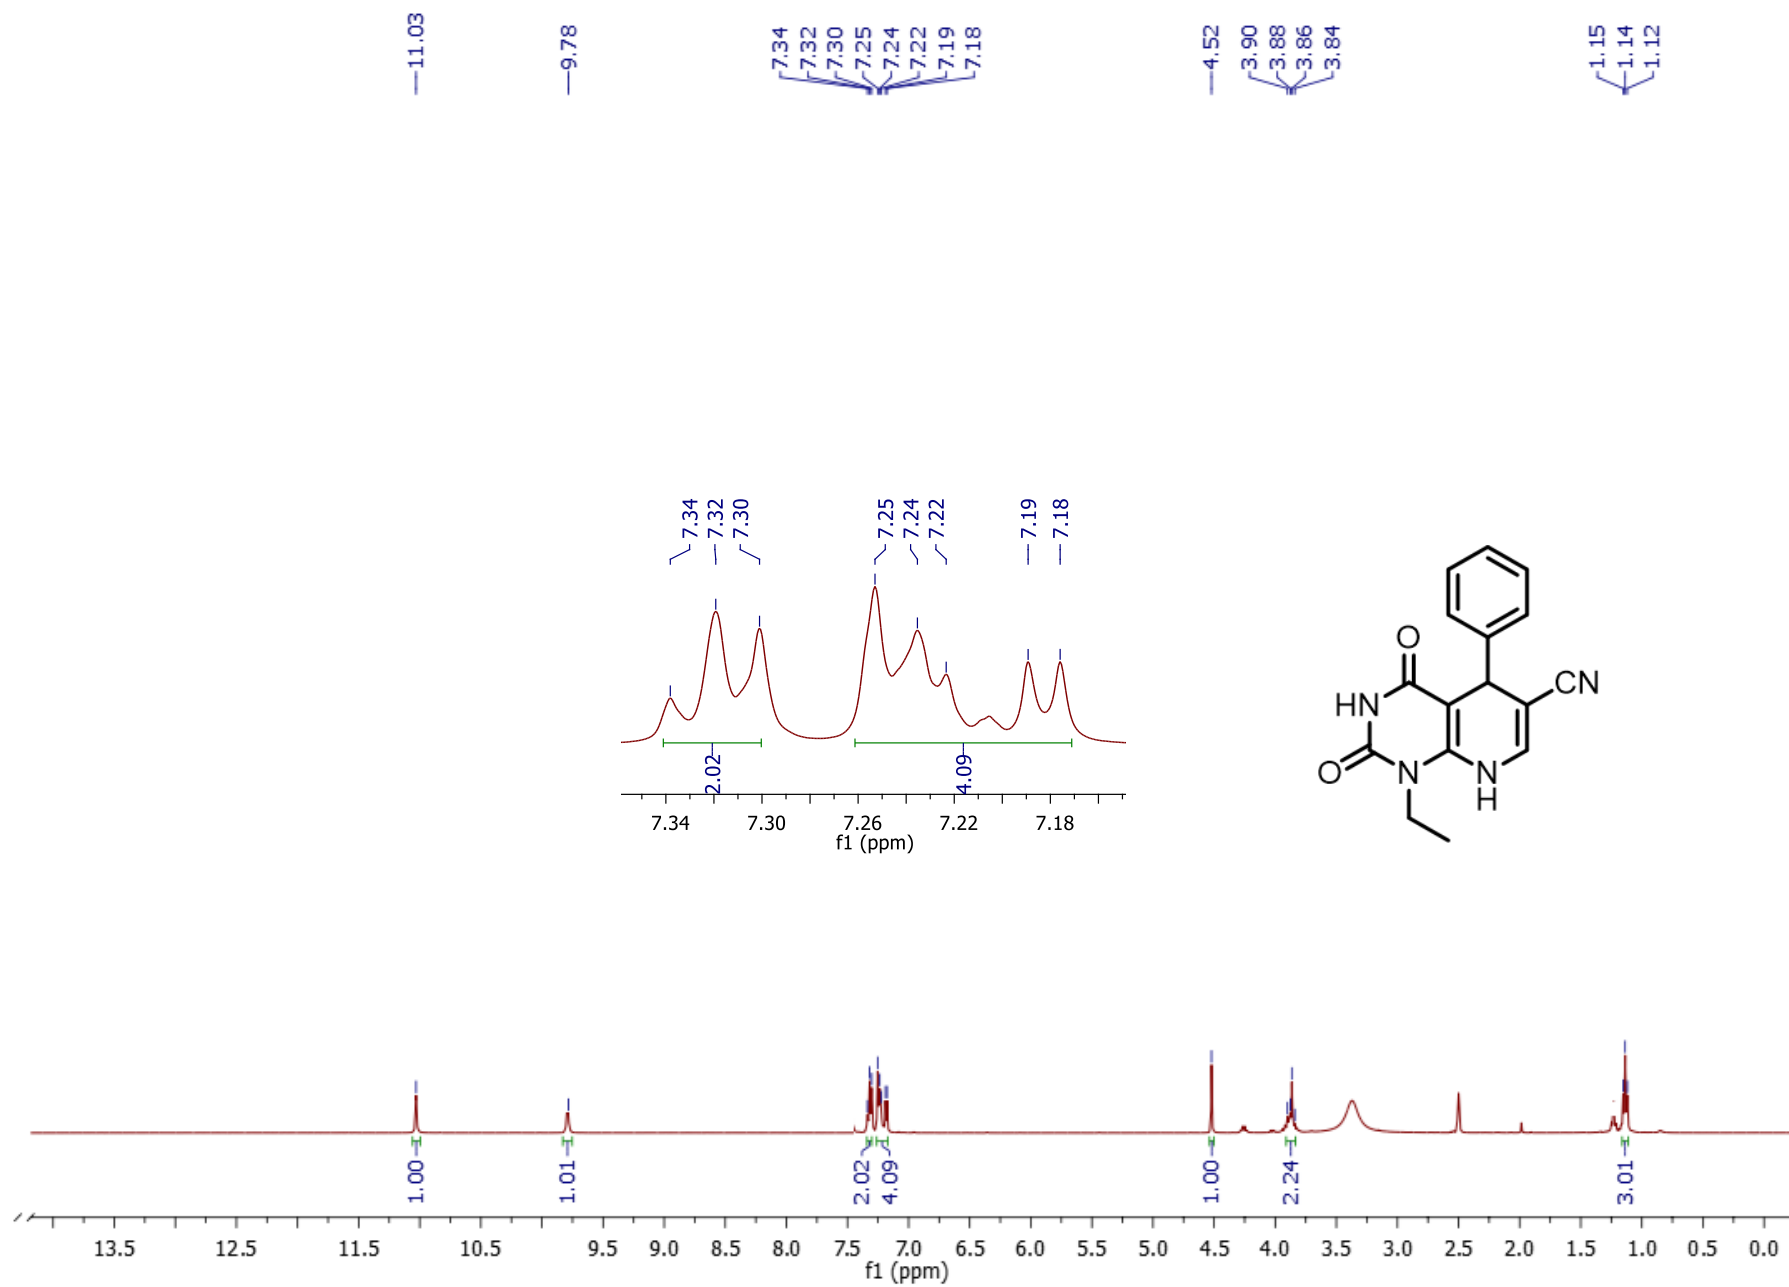

**Figure S63.**  $^1\text{H-NMR}$  ( $\text{DMSO-d}_6$ ) spectra of compound **4cb**.

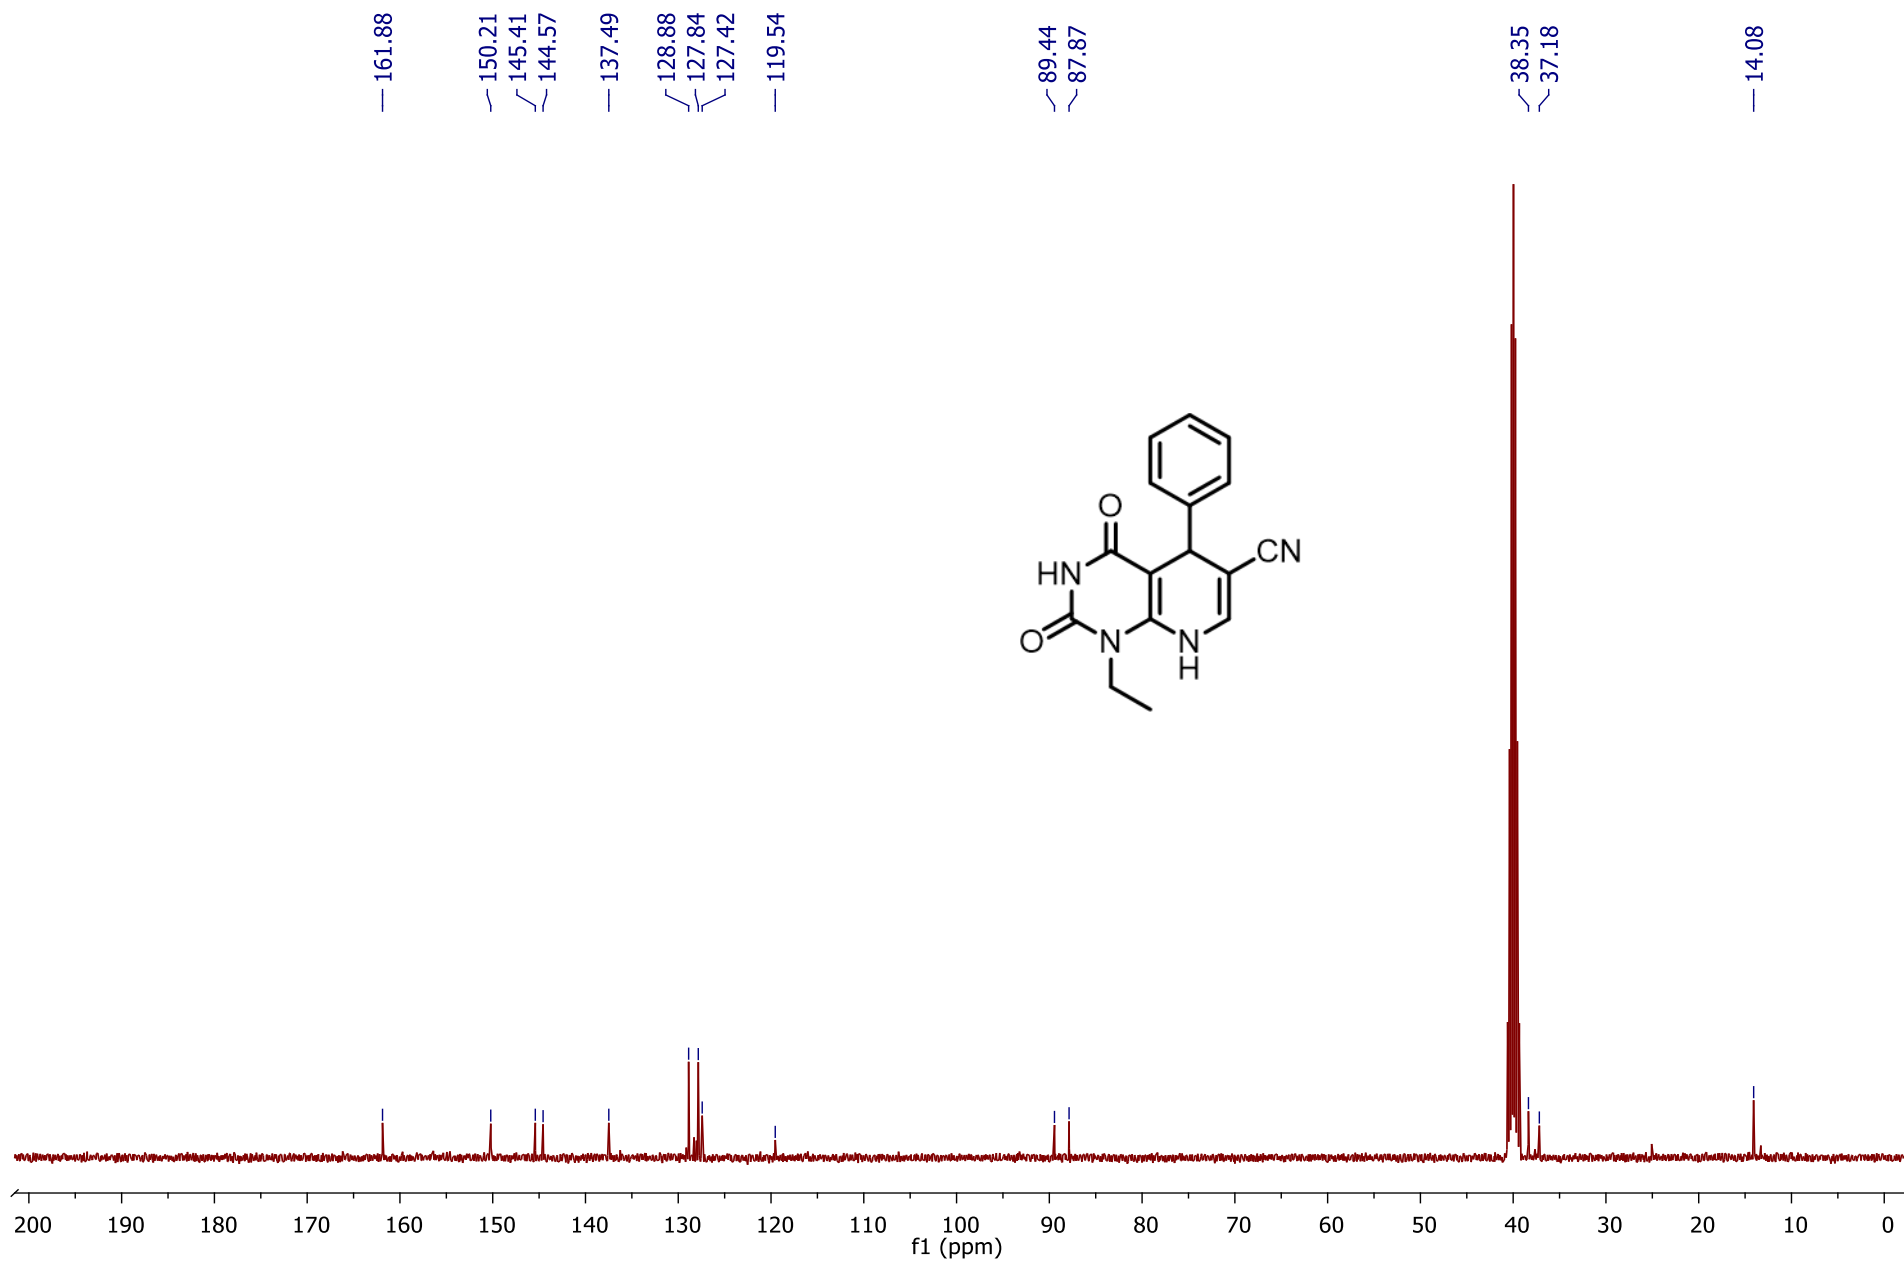

**Figure S64.**  $^{13}\text{C}$ -NMR (DMSO- $d_6$ ) spectra of compound **4cb**.

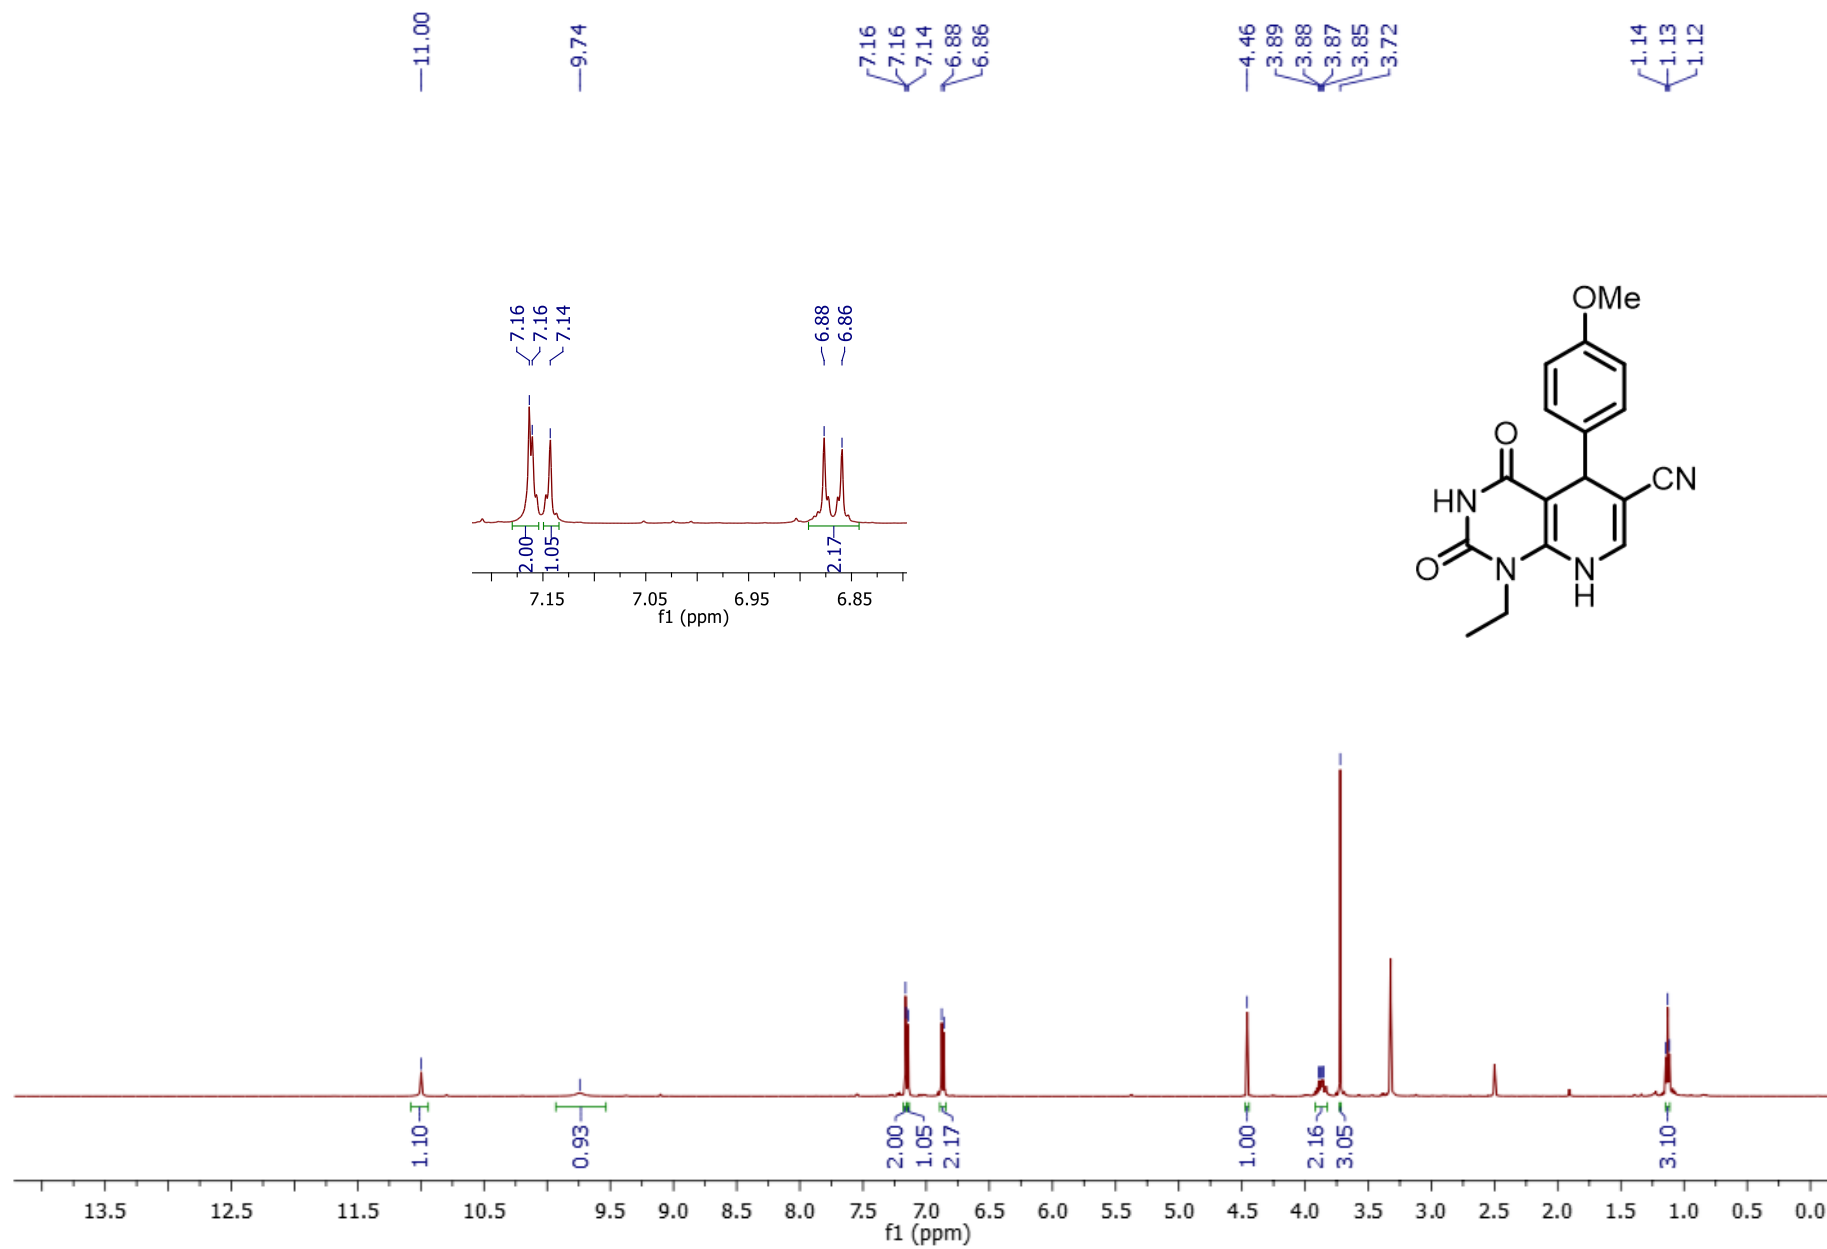

**Figure S65.** <sup>1</sup>H-NMR (DMSO-d<sub>6</sub>) spectra of compound **4cc**.

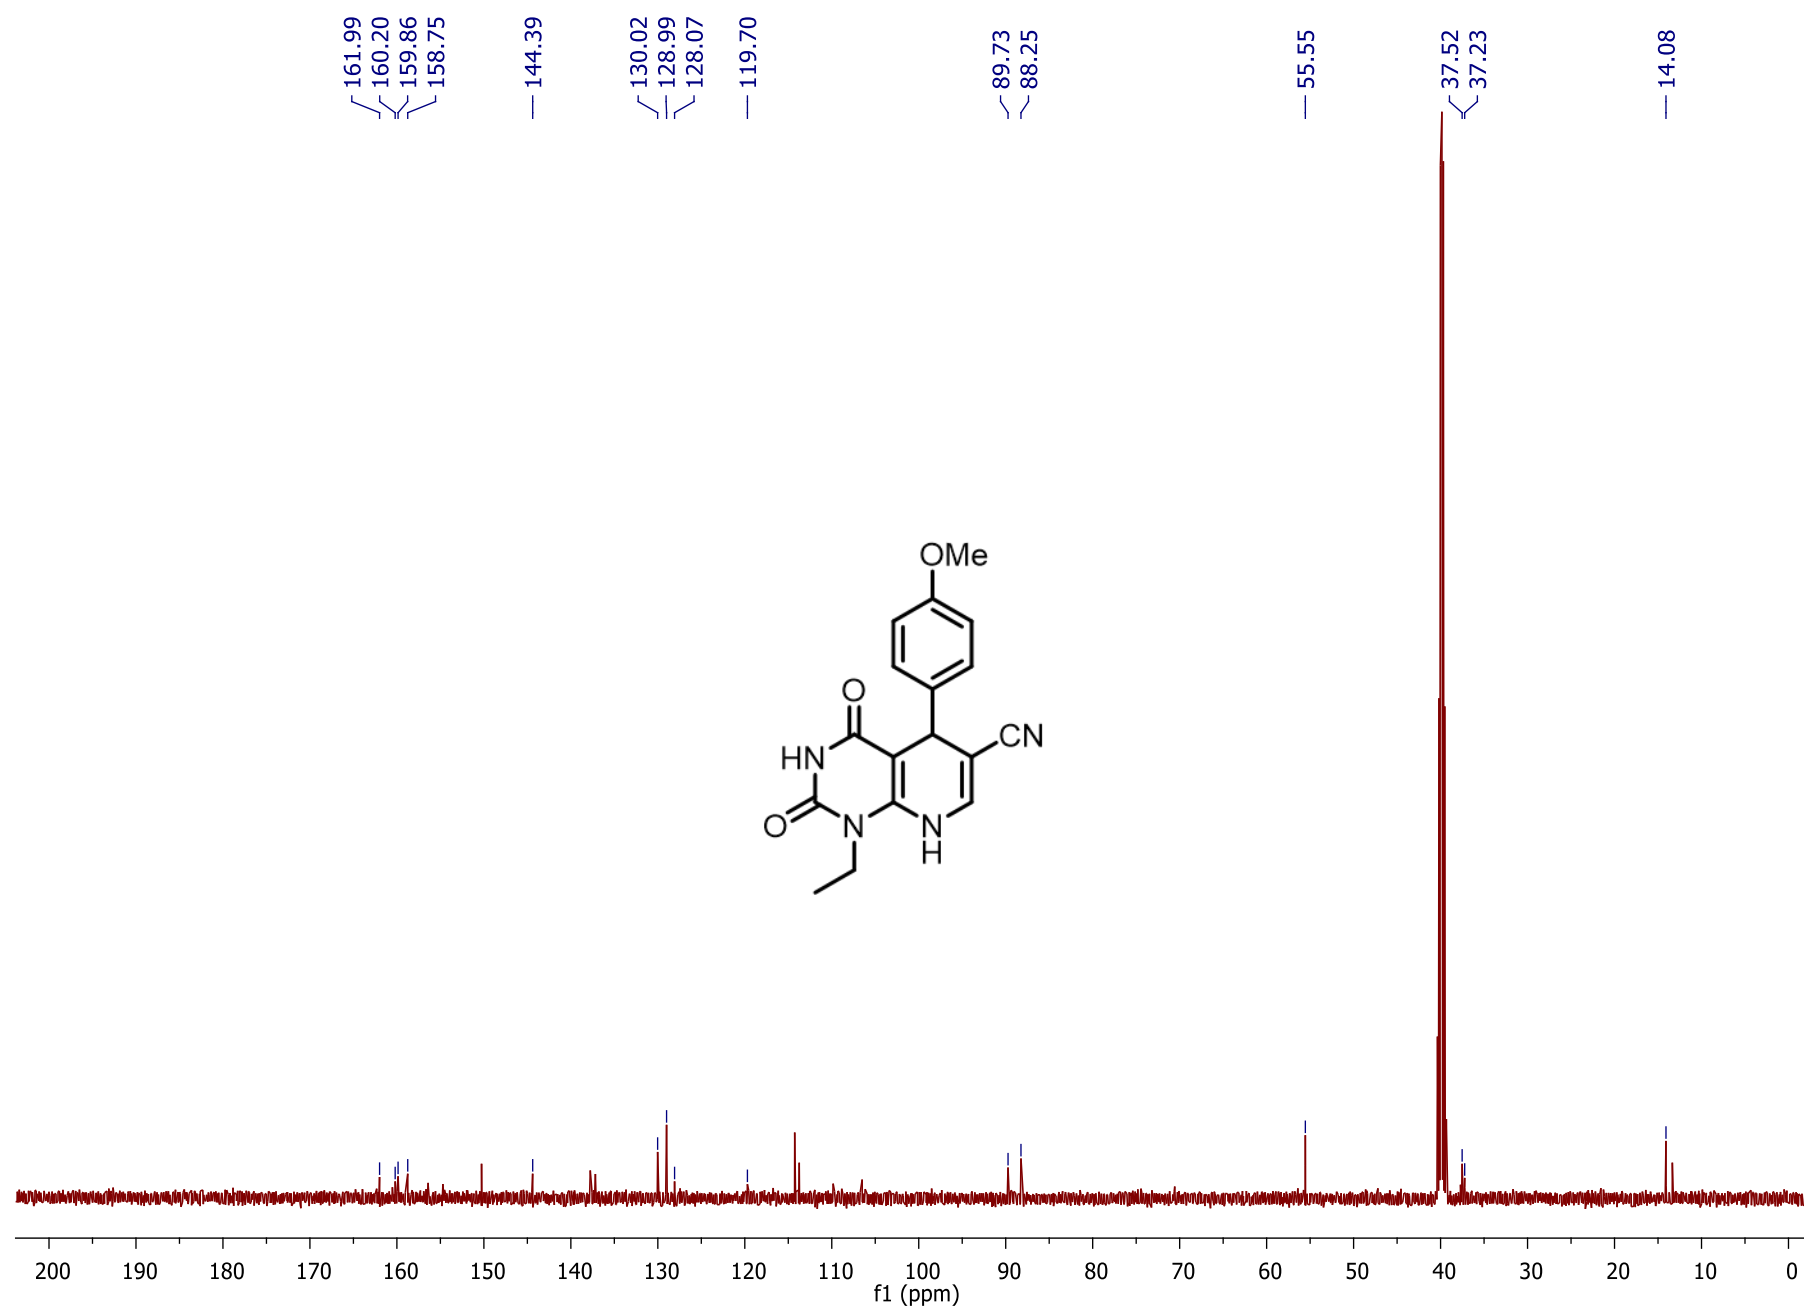

**Figure S66.**  $^{13}\text{C}$ -NMR (DMSO- $d_6$ ) spectra of compound **4cc**.

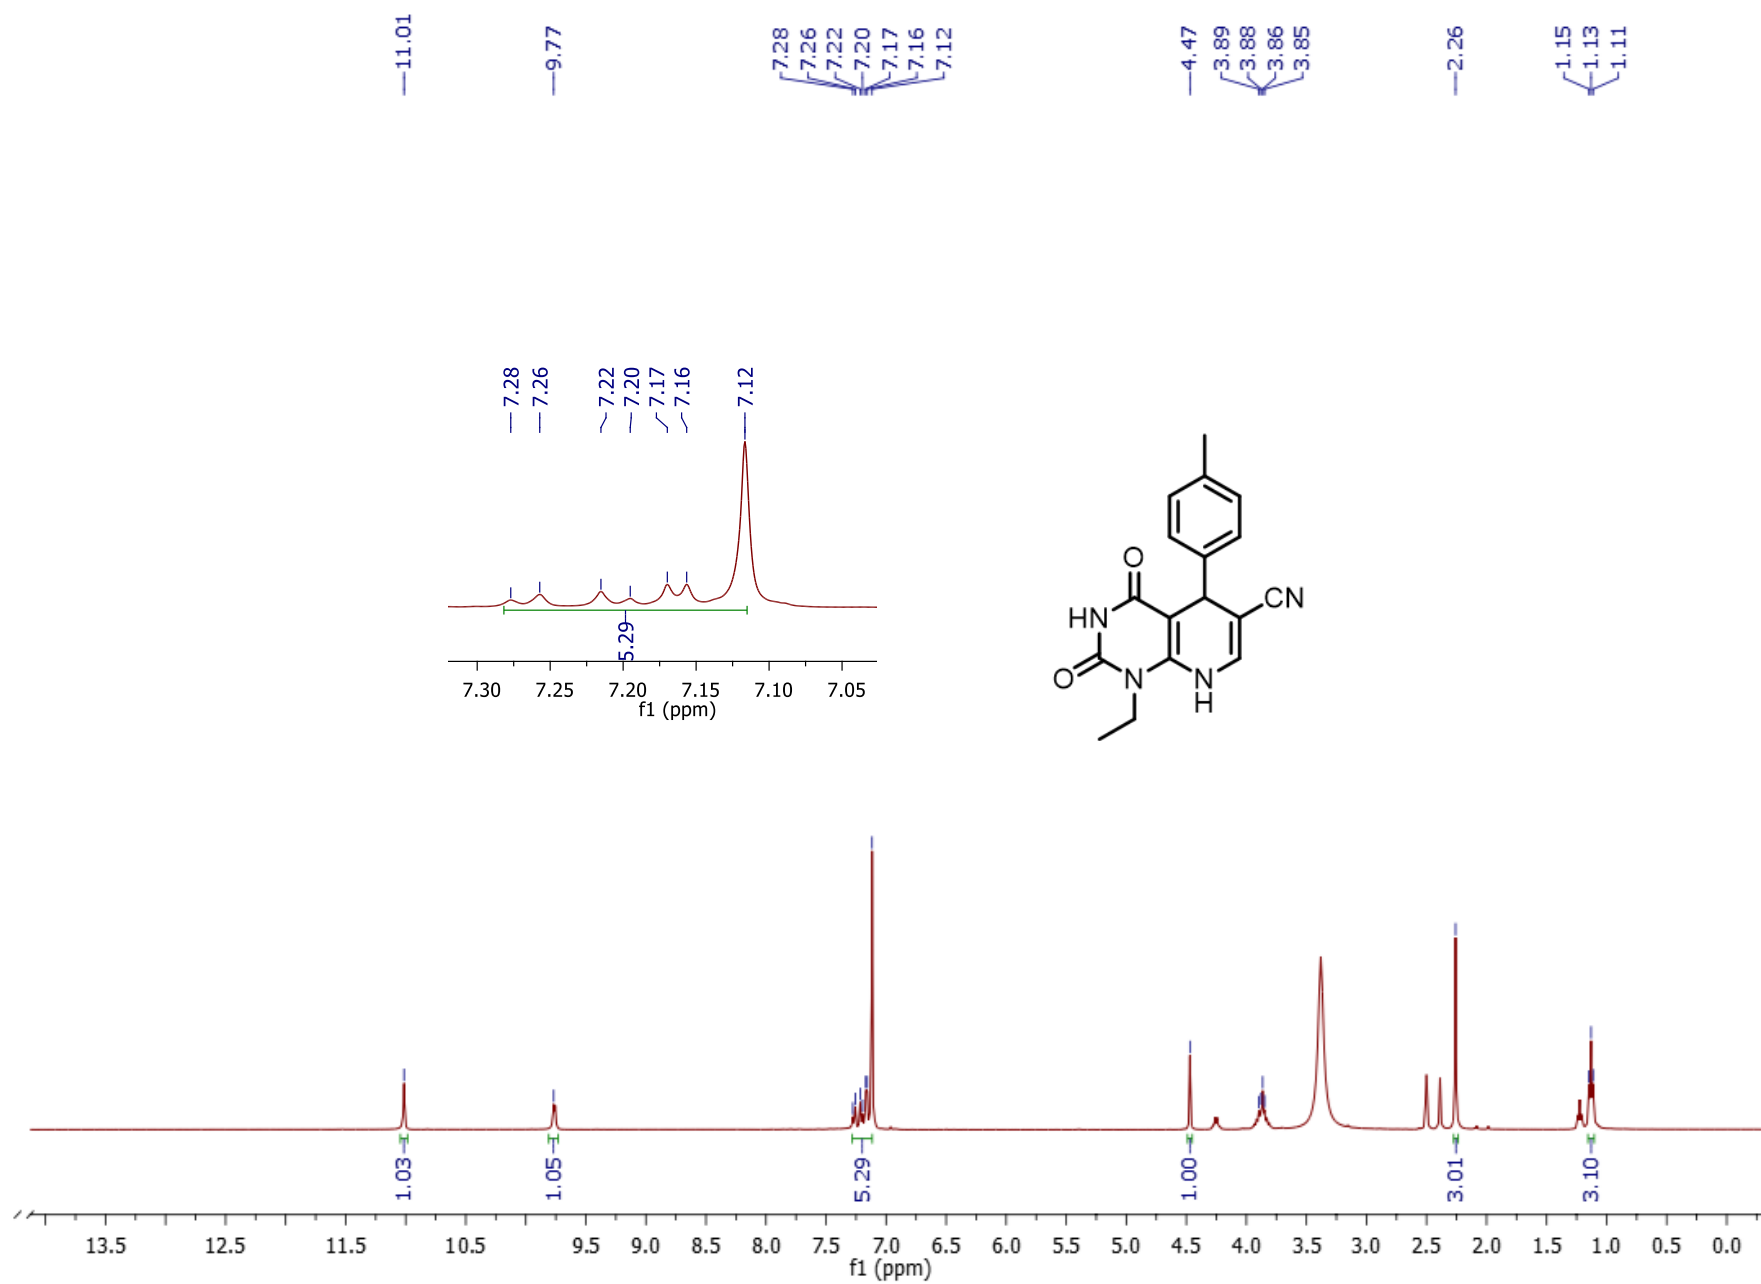

**Figure S67.** <sup>1</sup>H-NMR (DMSO-d<sub>6</sub>) spectra of compound **4cd**.

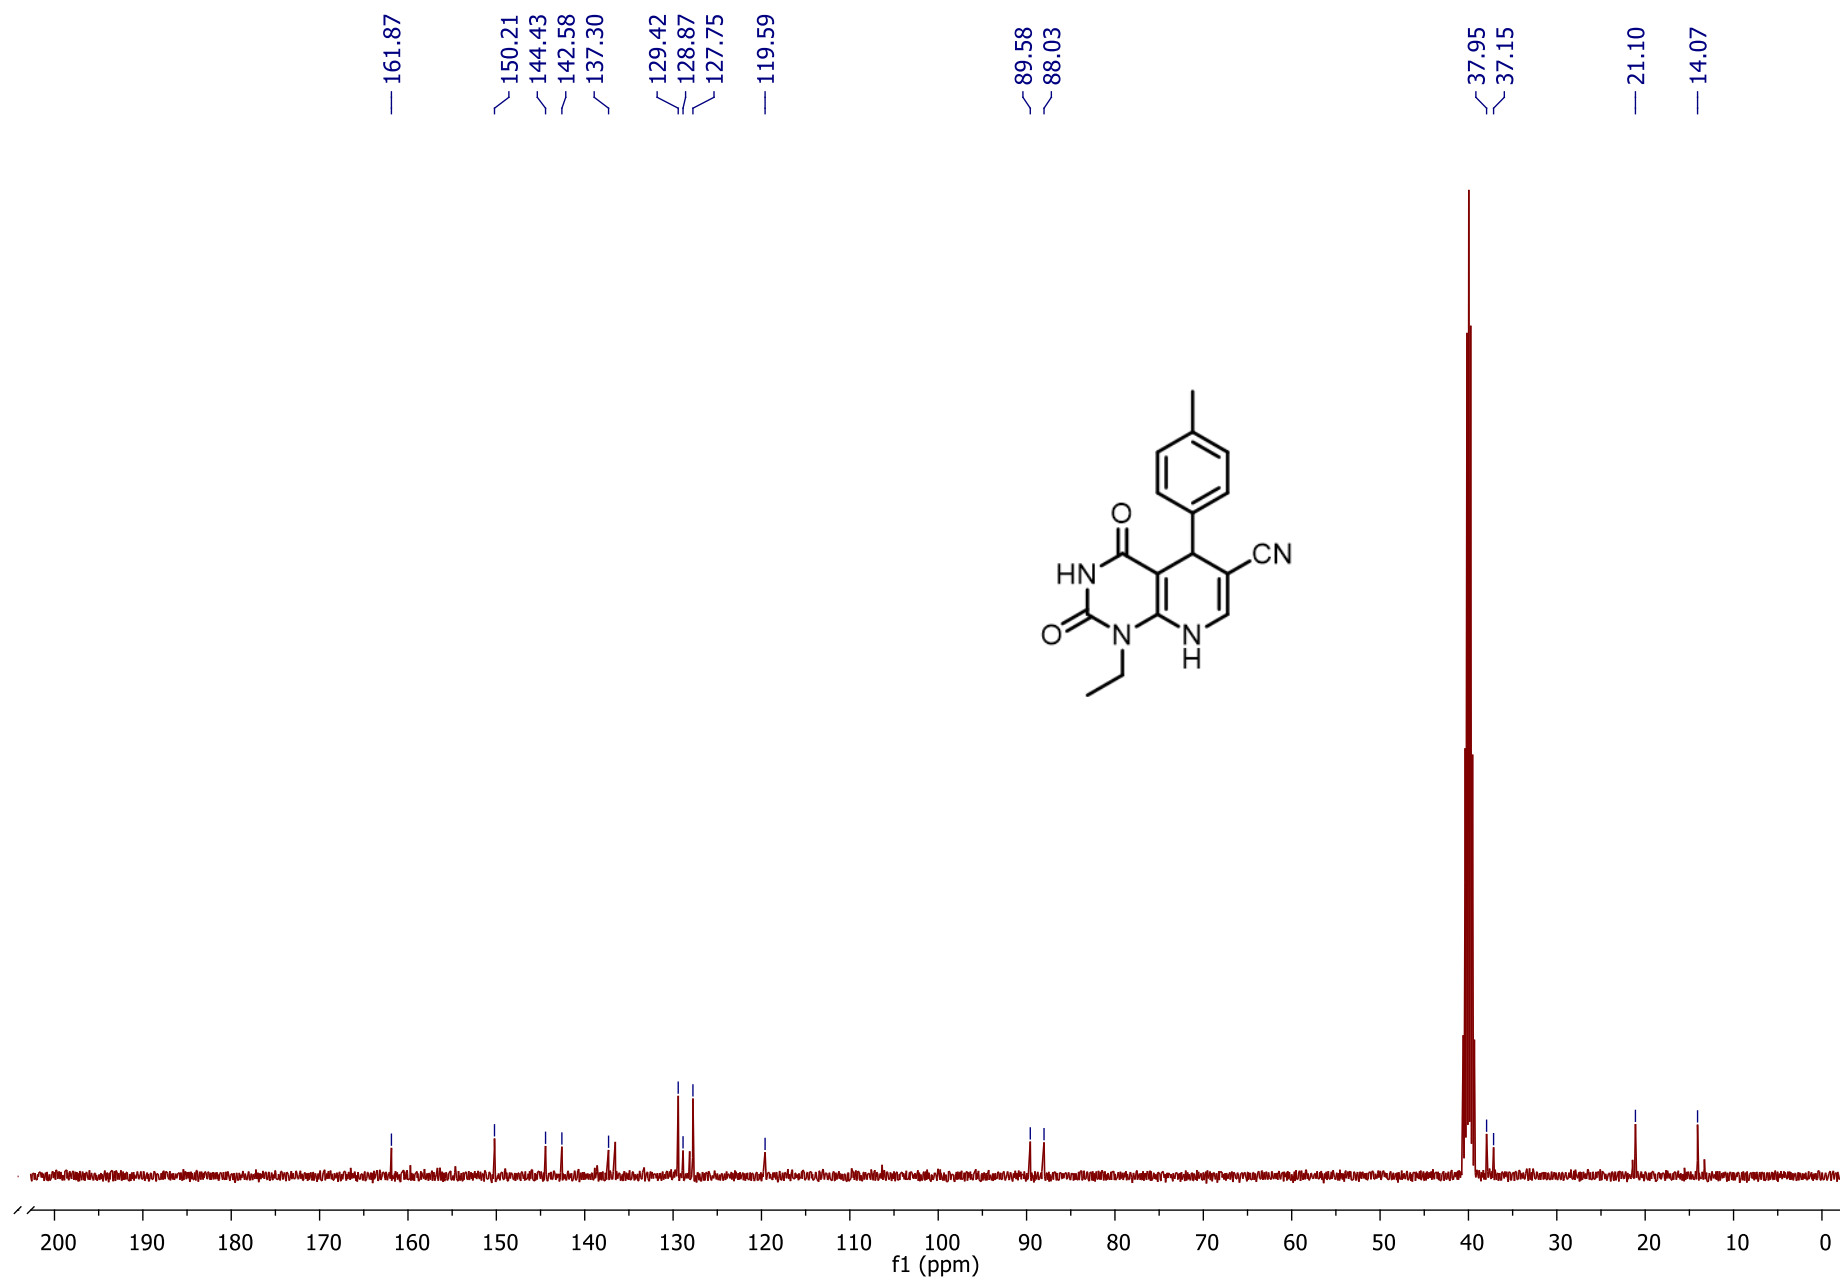

Figure S68. <sup>13</sup>C-NMR (DMSO-d<sub>6</sub>) spectra of compound 4cd.

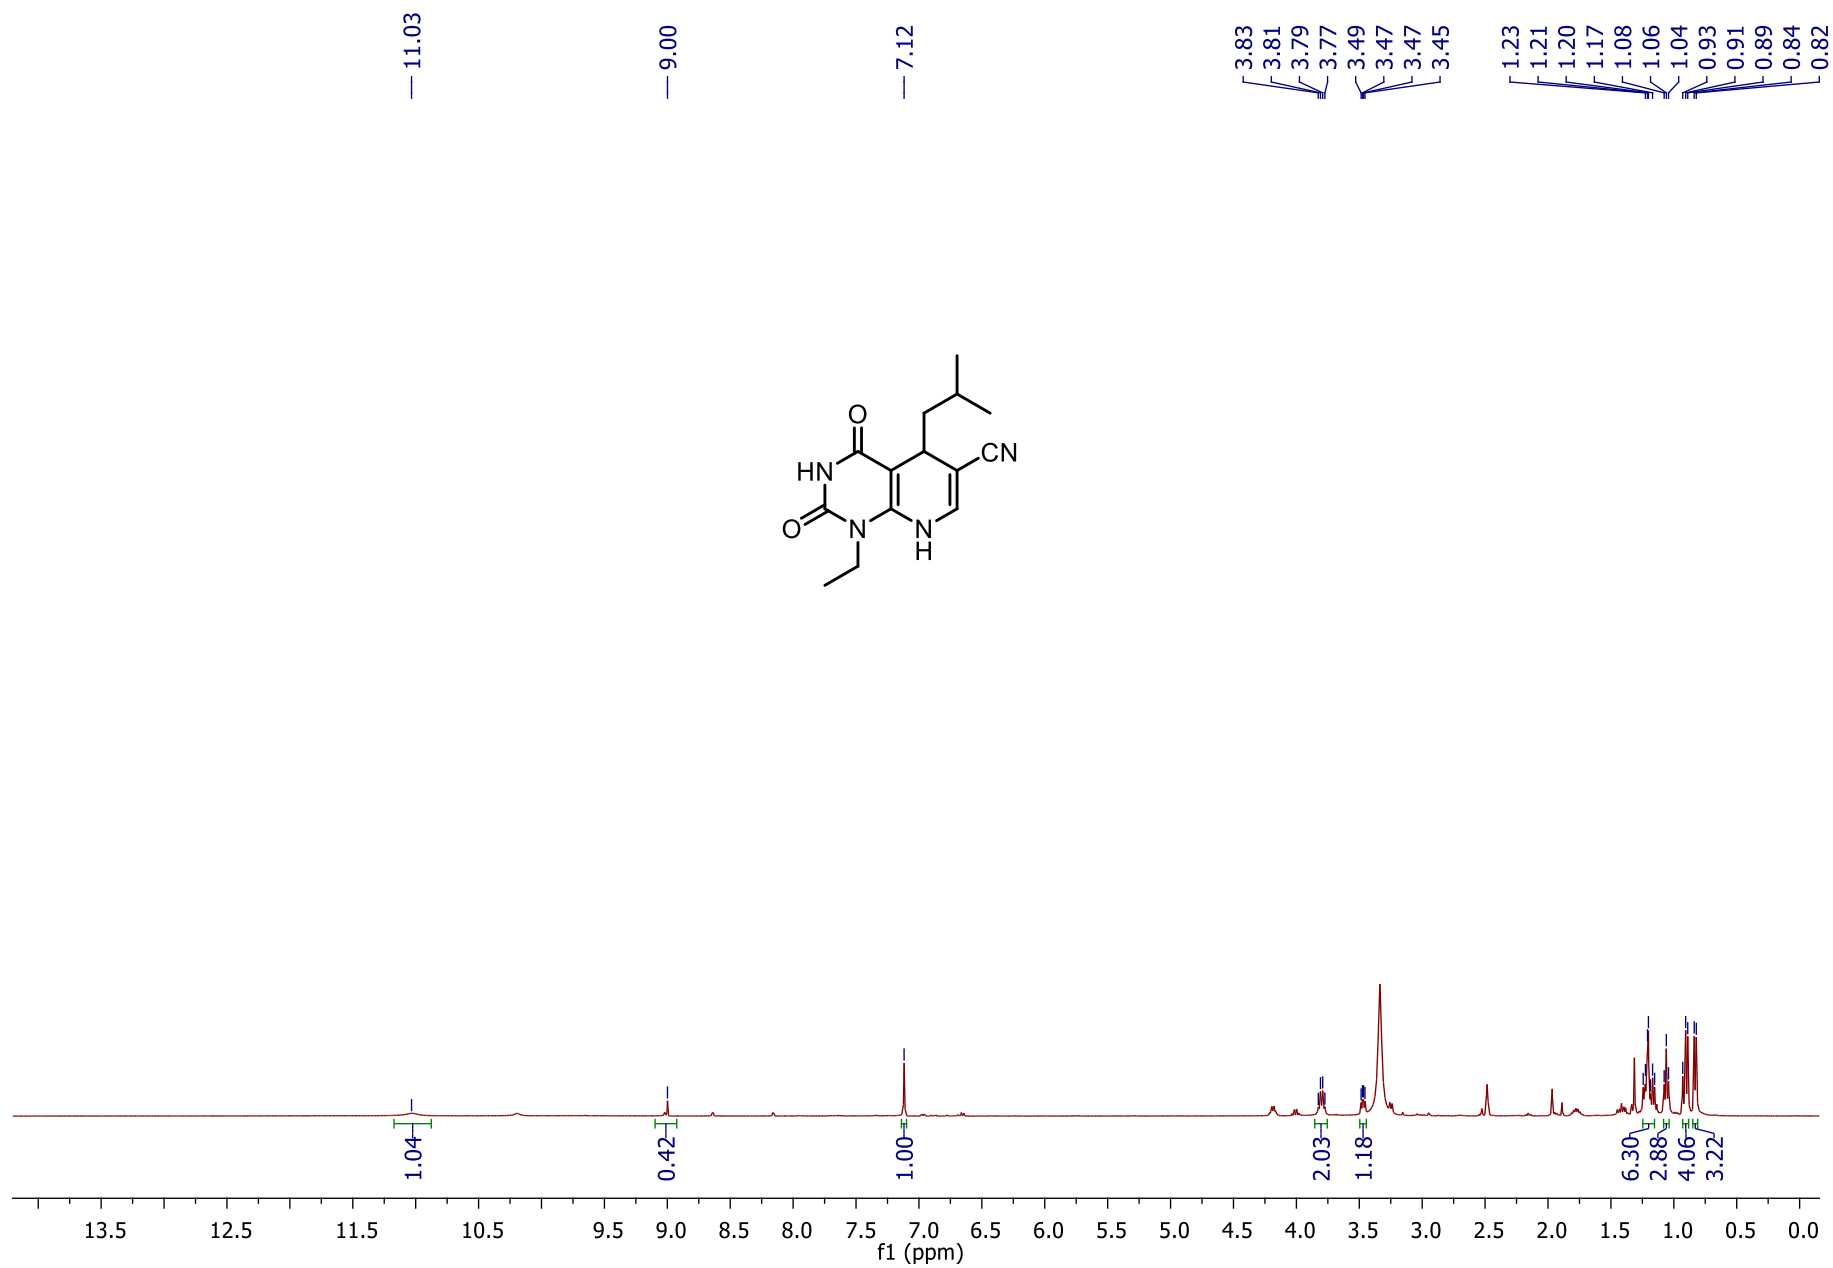

**Figure S69.** <sup>1</sup>H-NMR (DMSO-d<sub>6</sub>) spectra of compound **4ce**.

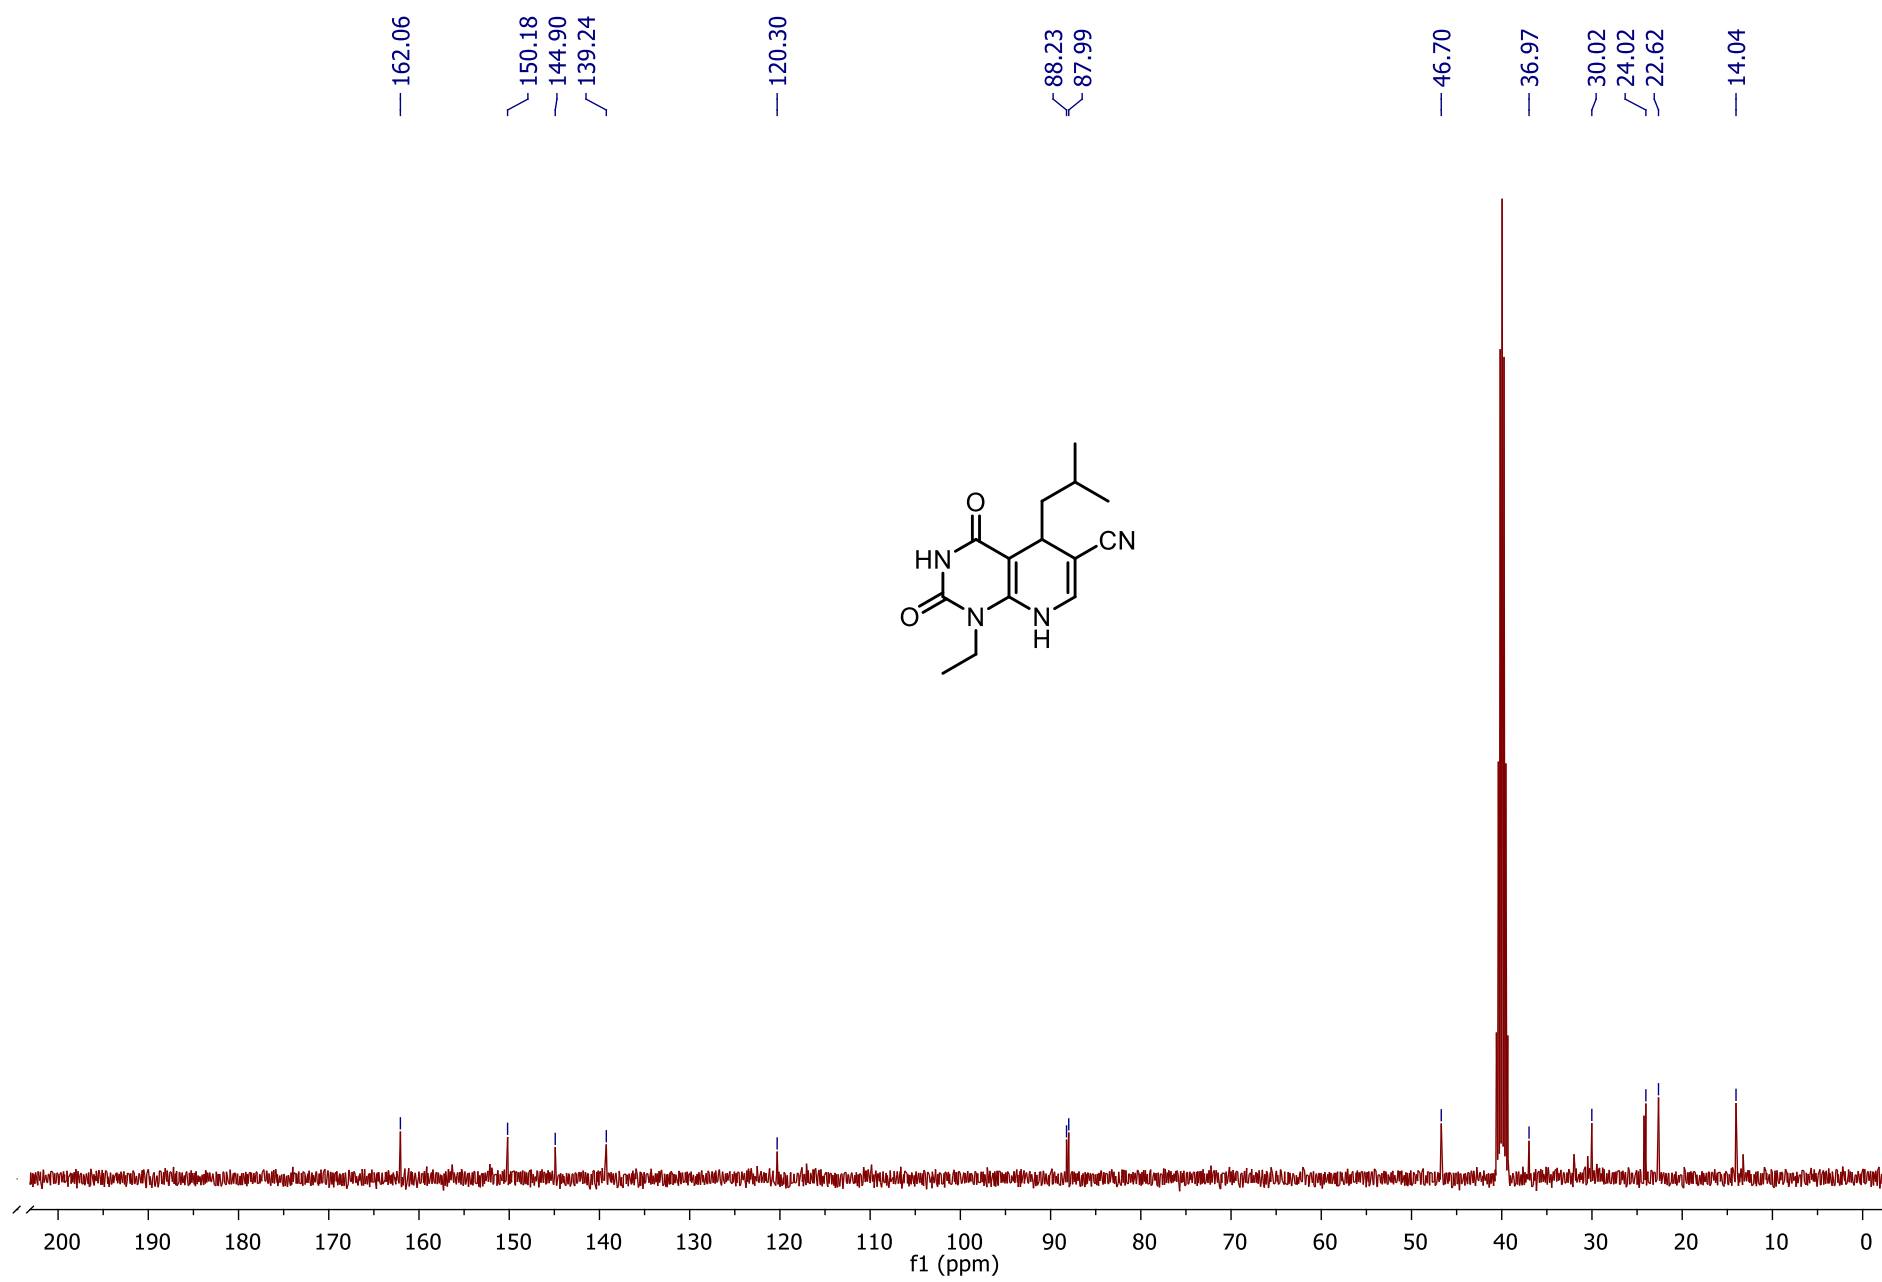

**Figure S70.**  $^{13}\text{C}$ -NMR (DMSO- $d_6$ ) spectra of compound **4ce**.

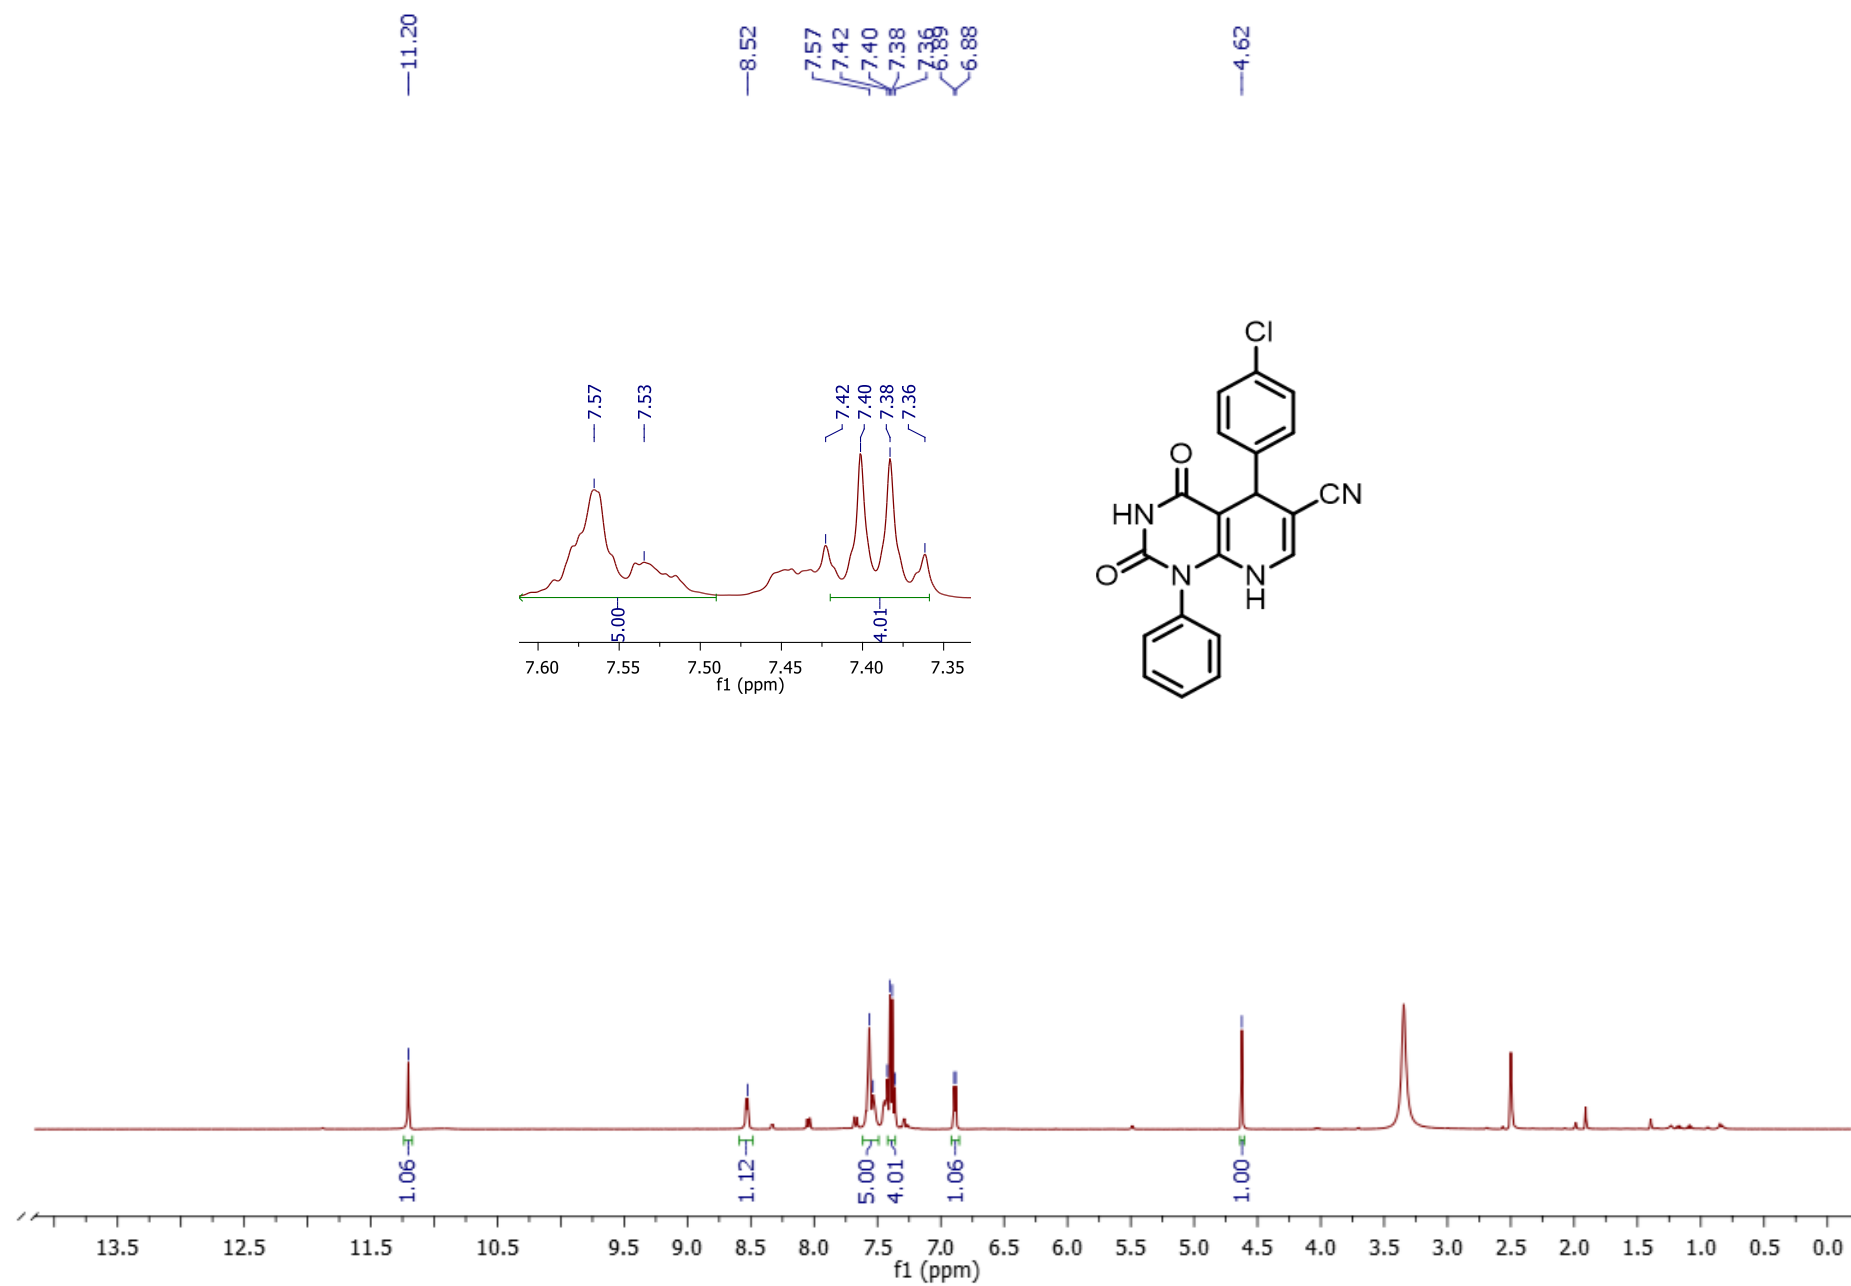

**Figure S71.** <sup>1</sup>H-NMR (DMSO-d<sub>6</sub>) spectra of compound **4da**.

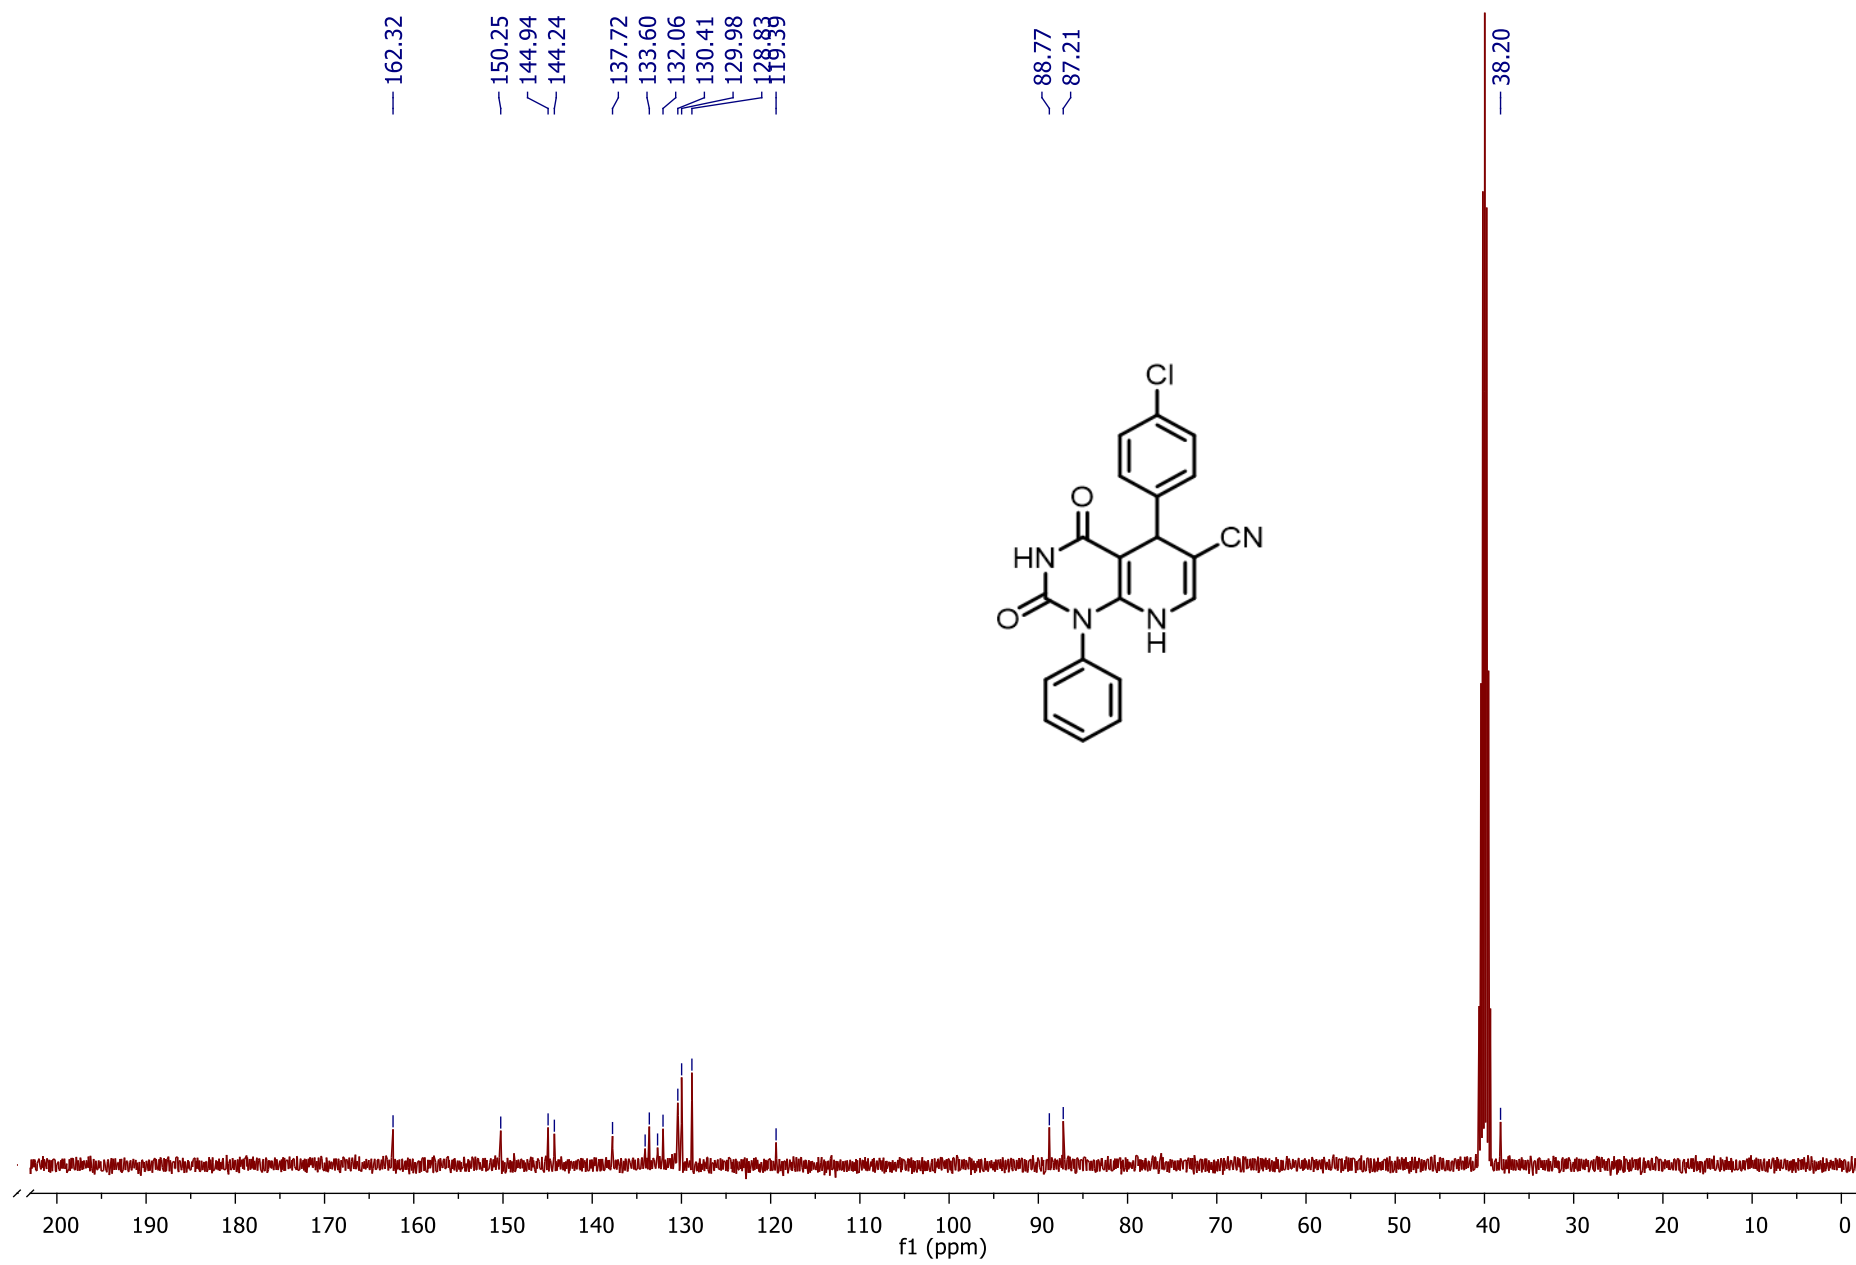

Figure S72. <sup>13</sup>C-NMR (DMSO-d<sub>6</sub>) spectra of compound 4da.

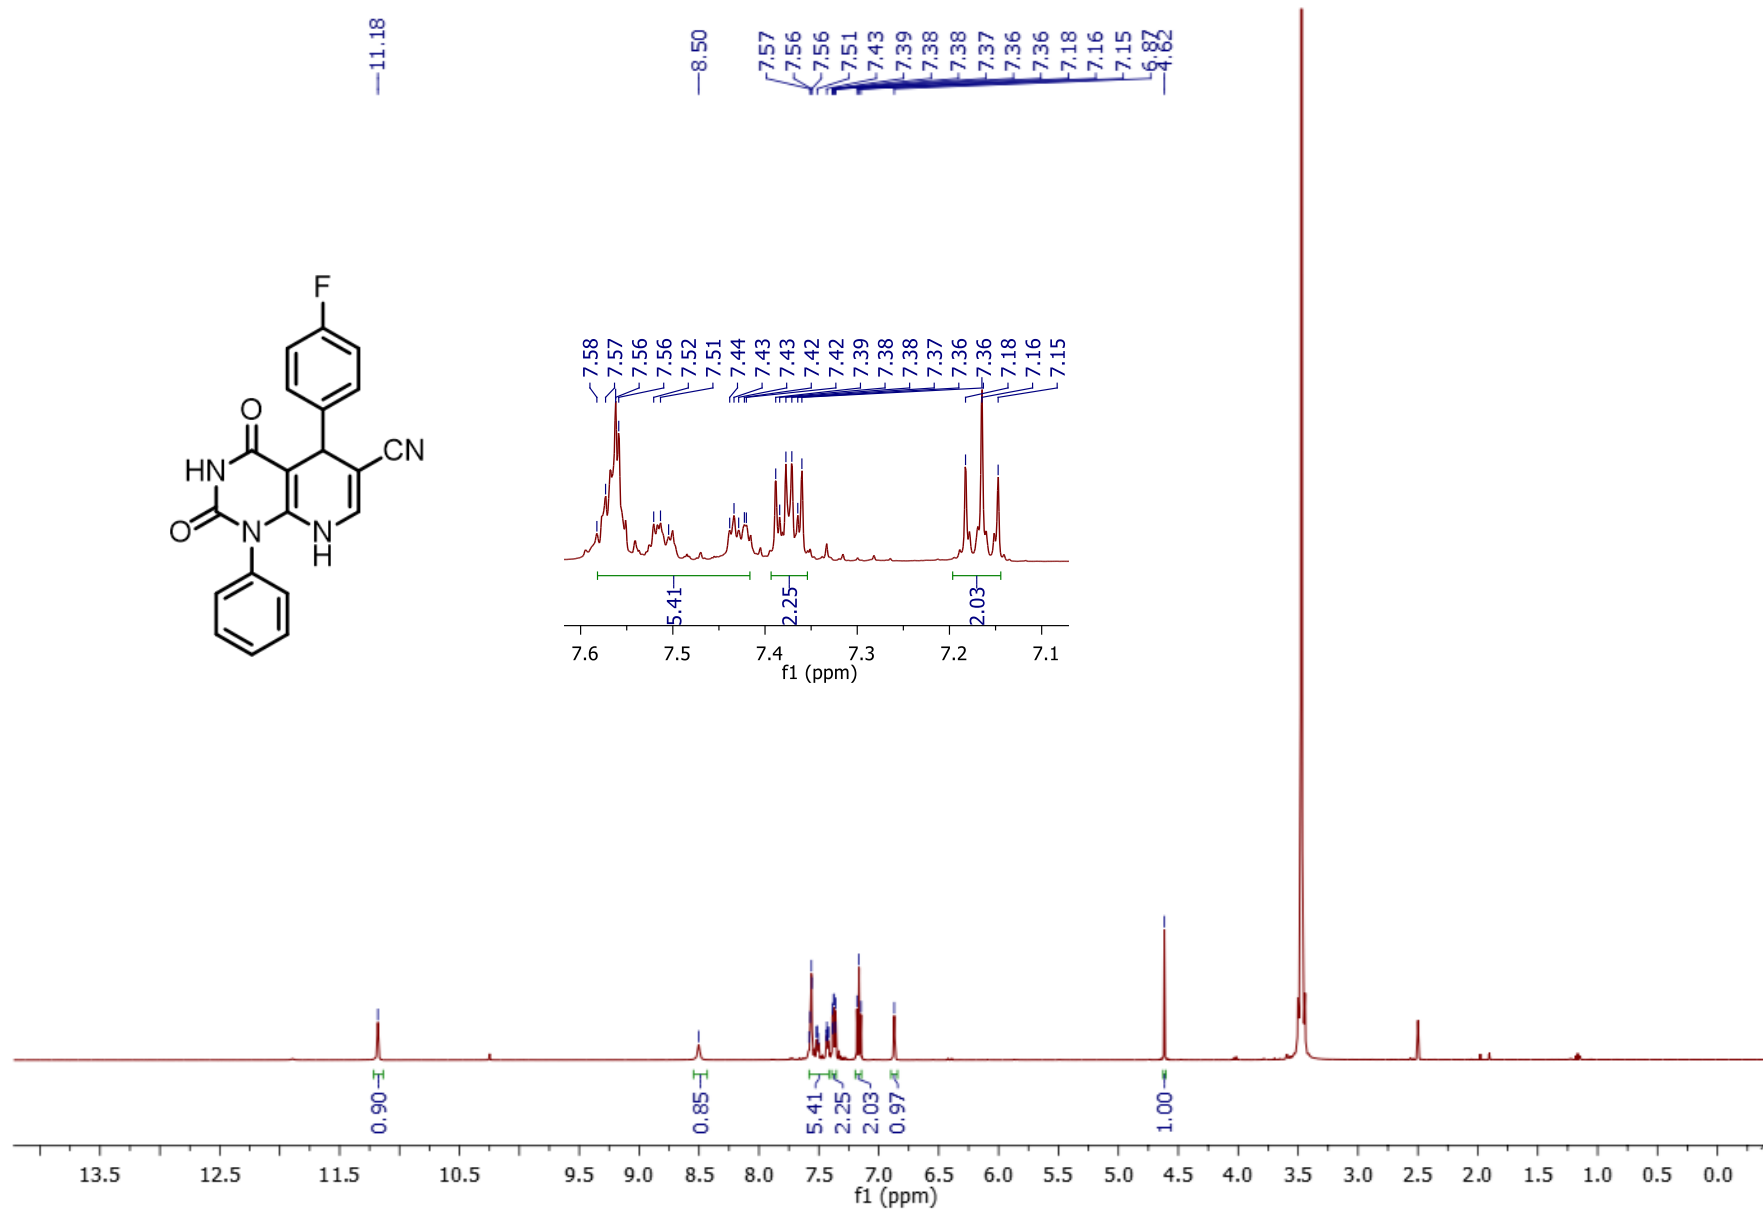

**Figure S73.** <sup>1</sup>H-NMR (DMSO-d<sub>6</sub>) spectra of compound **4db**.

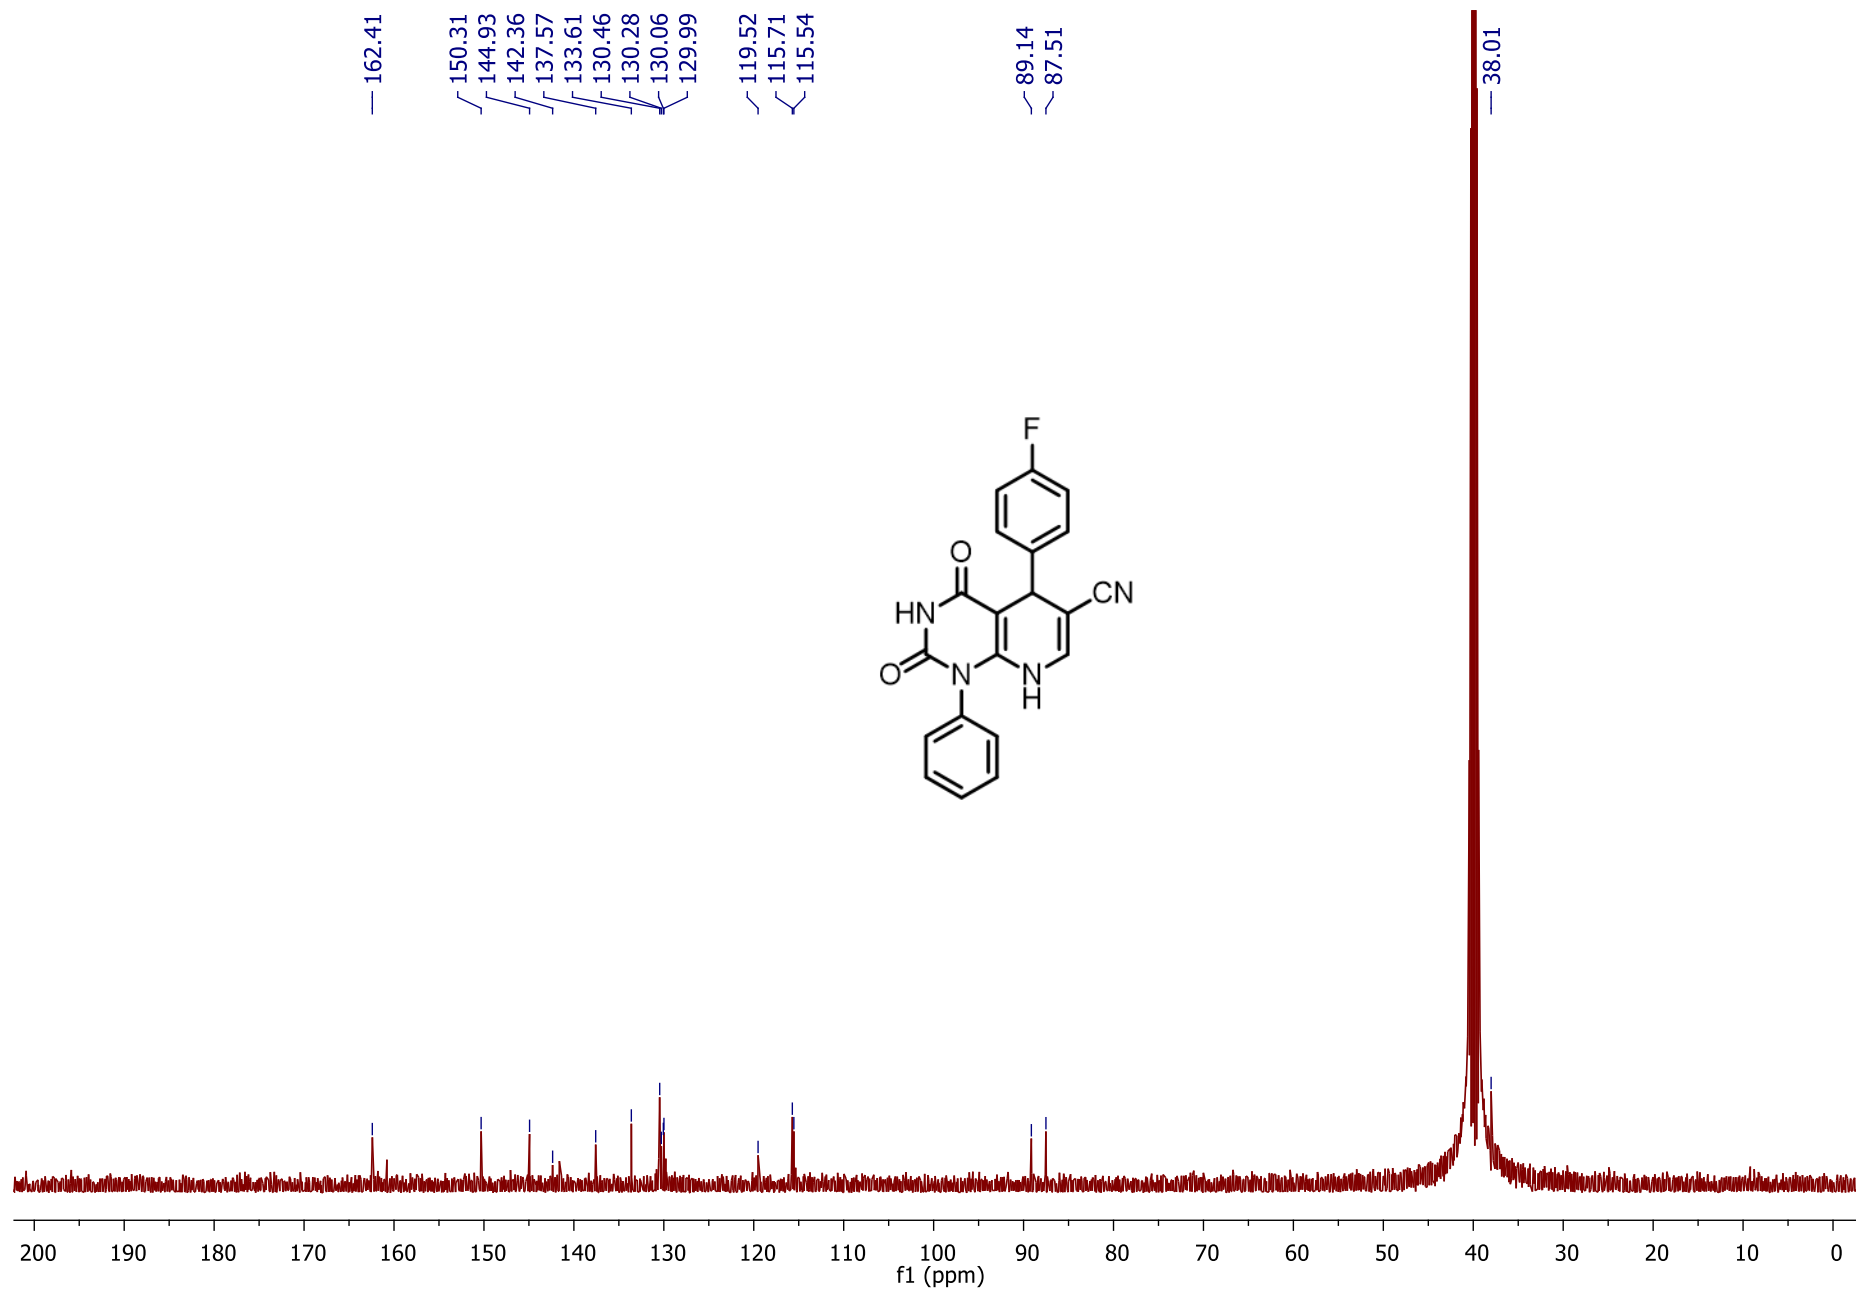

Figure S74. <sup>13</sup>C-NMR (DMSO-d<sub>6</sub>) spectra of compound 4db.

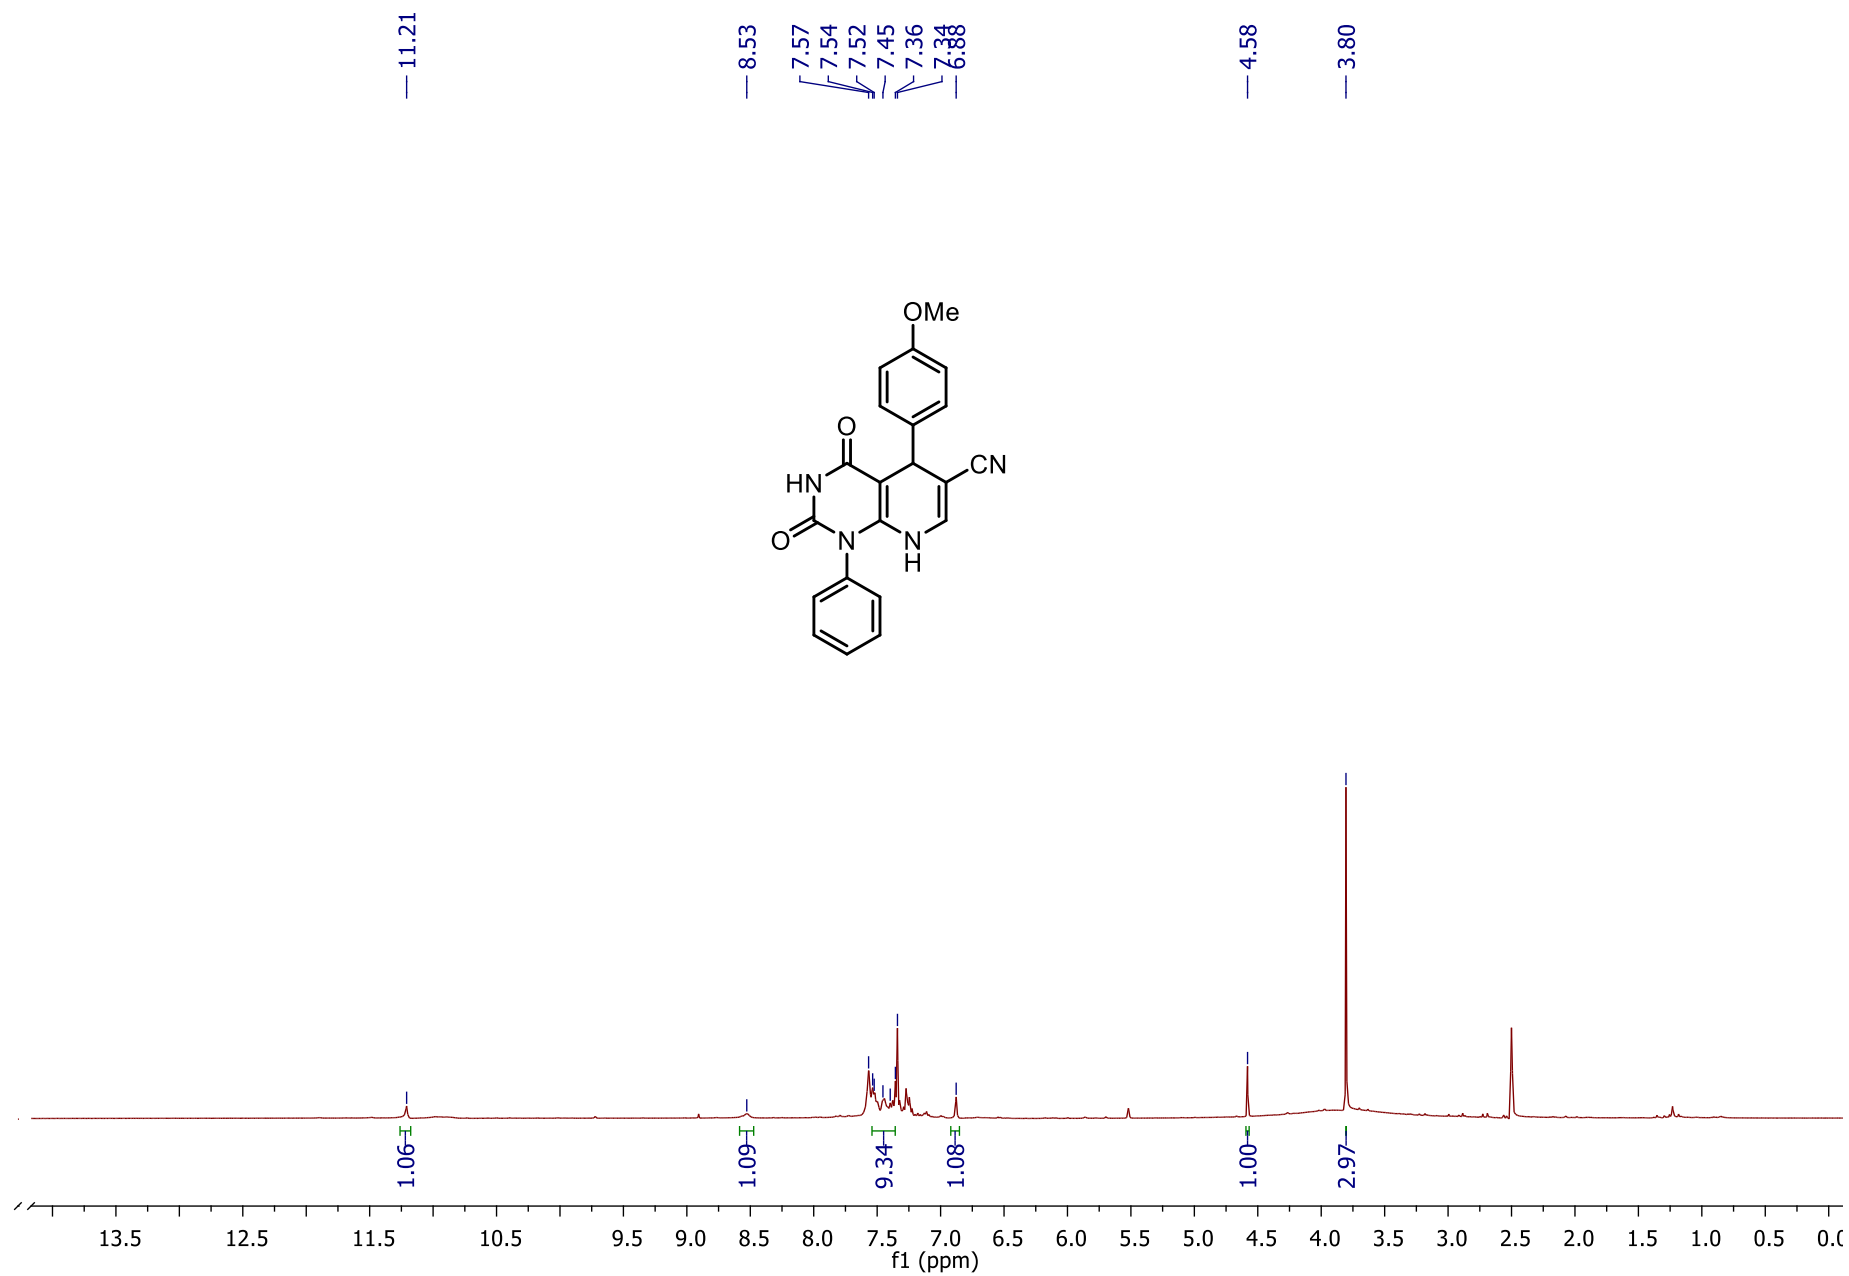

Figure S75. <sup>1</sup>H-NMR (DMSO-d<sub>6</sub>) spectra of compound 4dc.

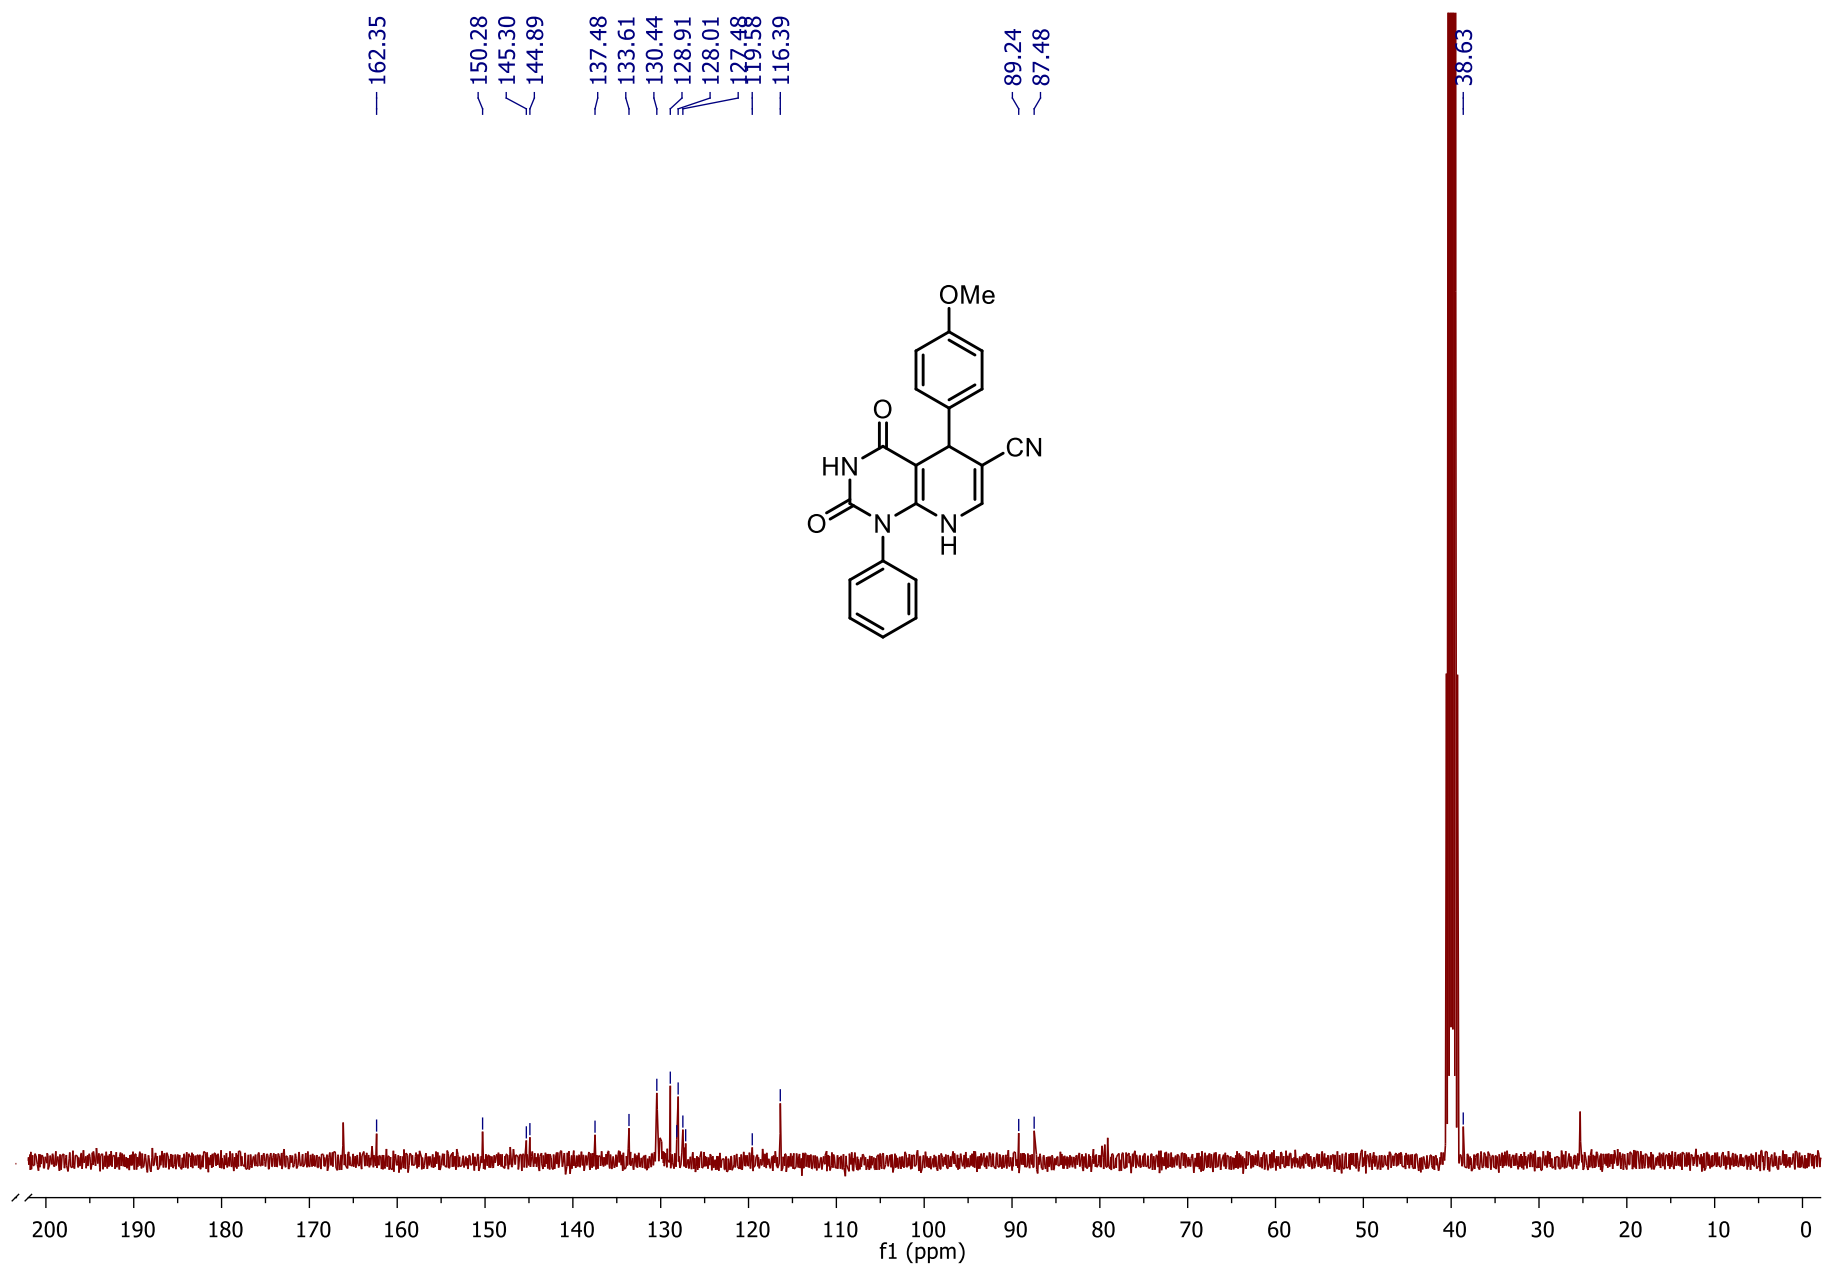

Figure S76. <sup>13</sup>C-NMR (DMSO-d<sub>6</sub>) spectra of compound 4dc.

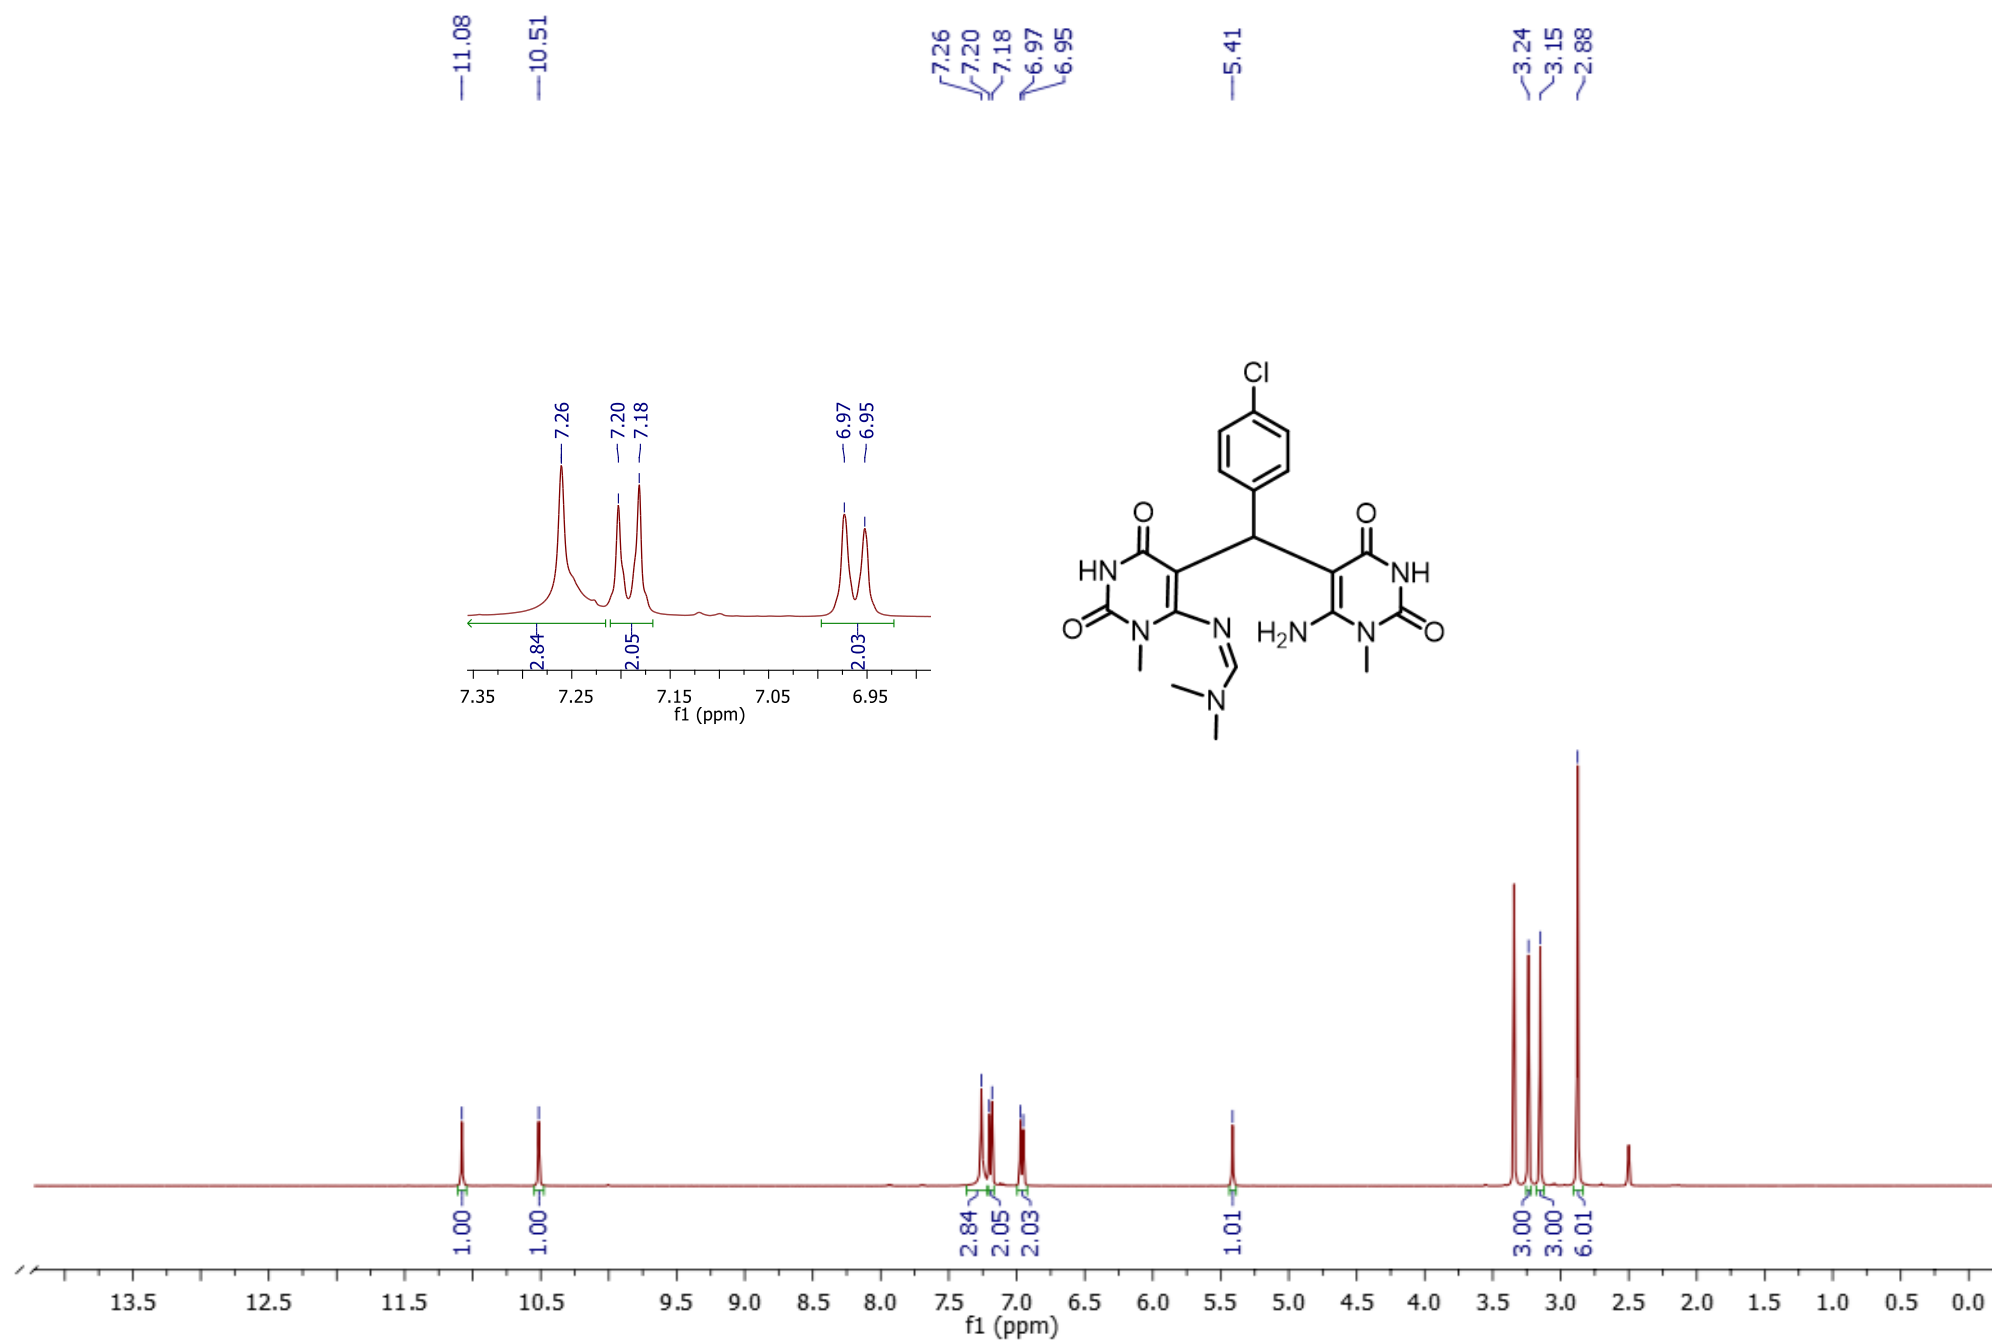

Figure S77.  $^1\text{H-NMR}$  (DMSO- $d_6$ ) spectra of compound **5aa**.

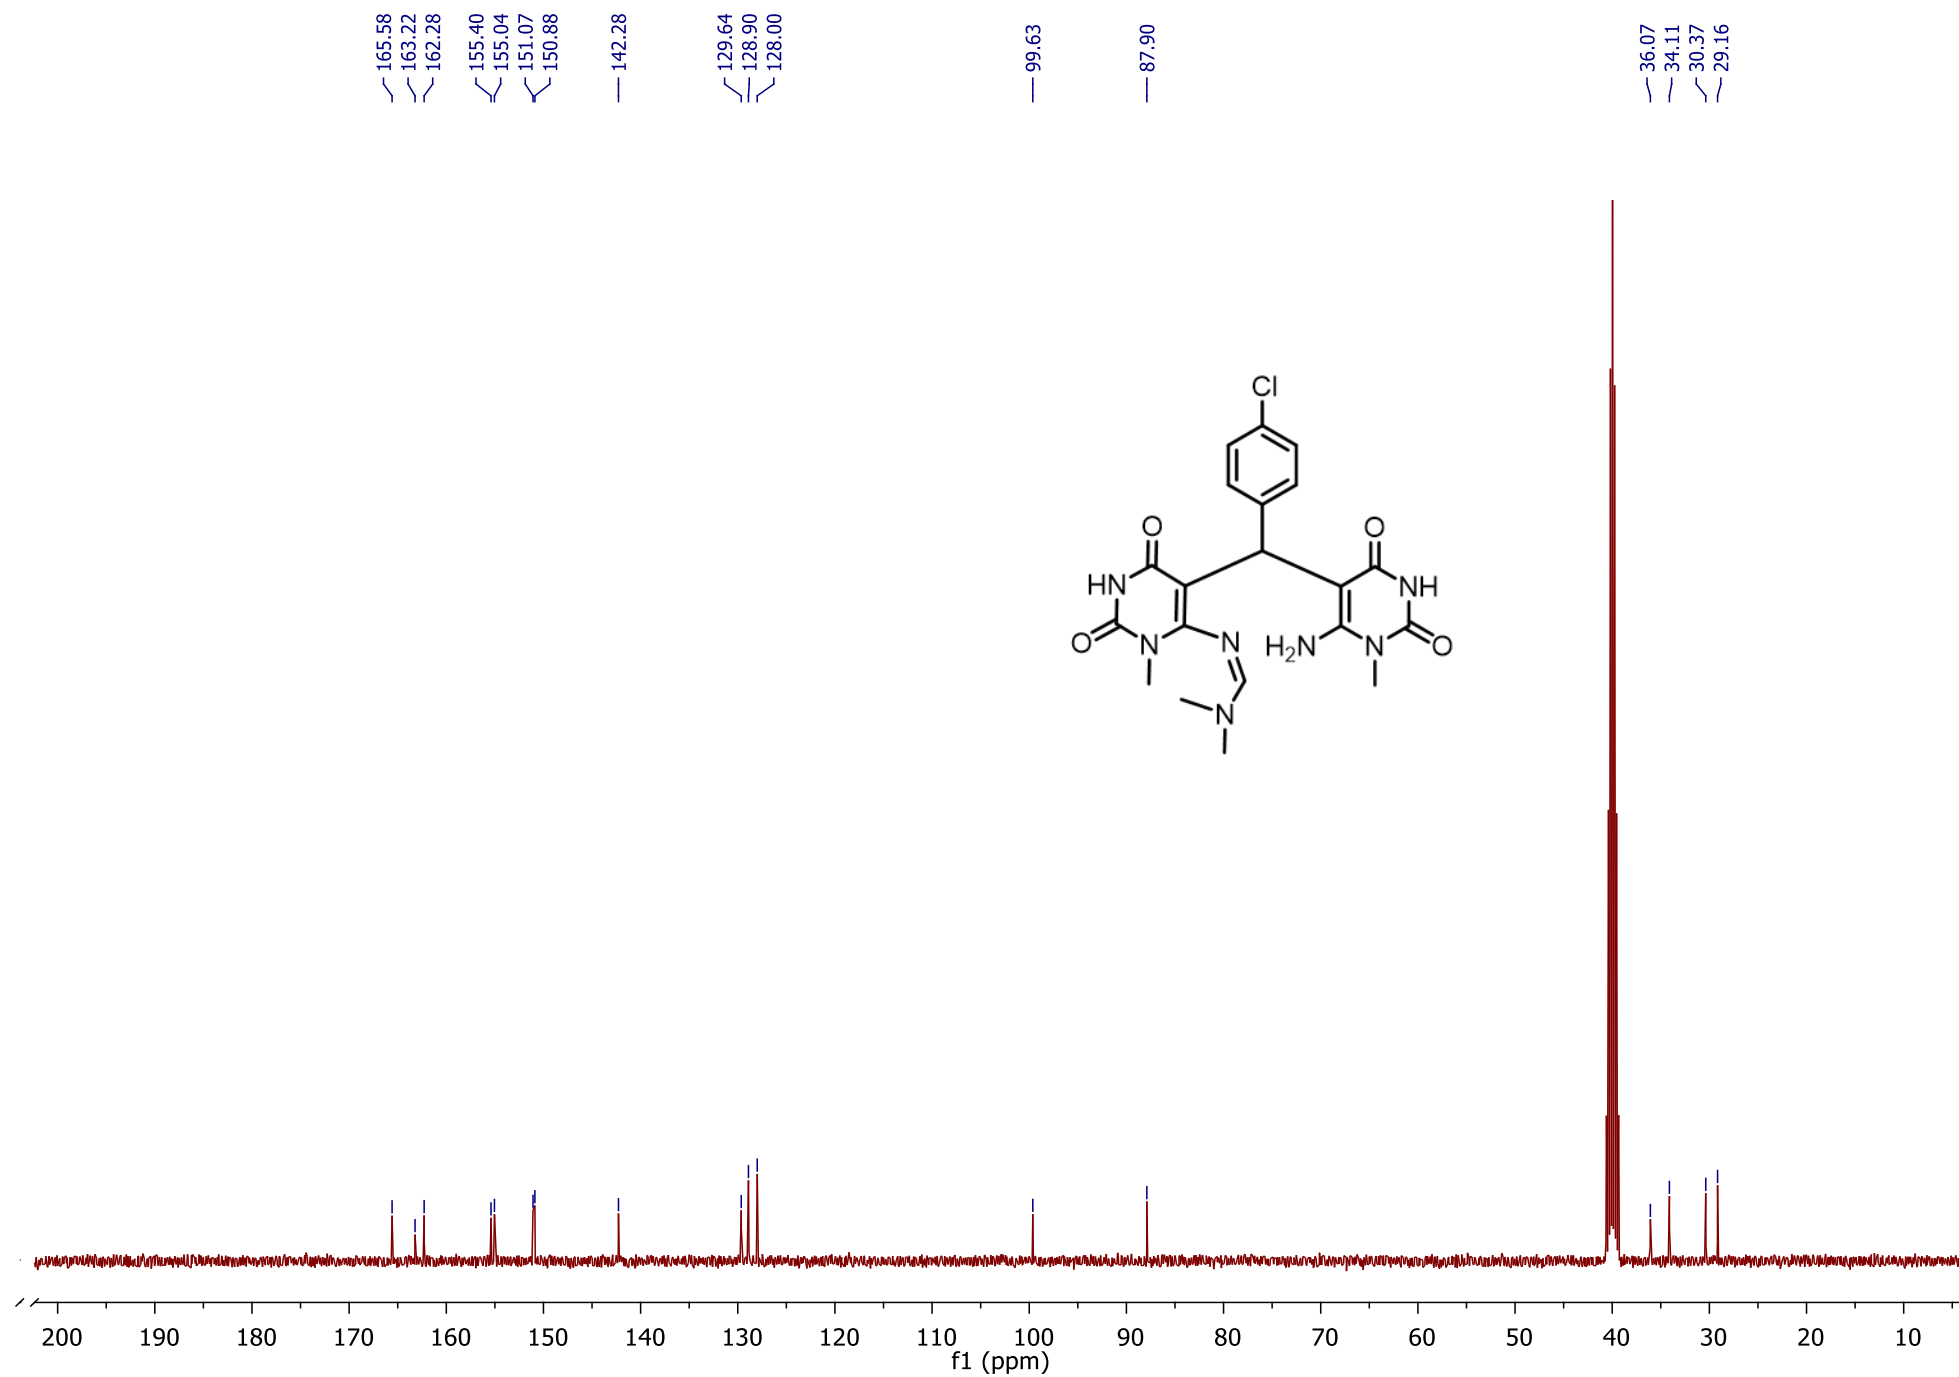

**Figure S78.**  $^{13}\text{C}$ -NMR (DMSO- $d_6$ ) spectra of compound **5aa**.

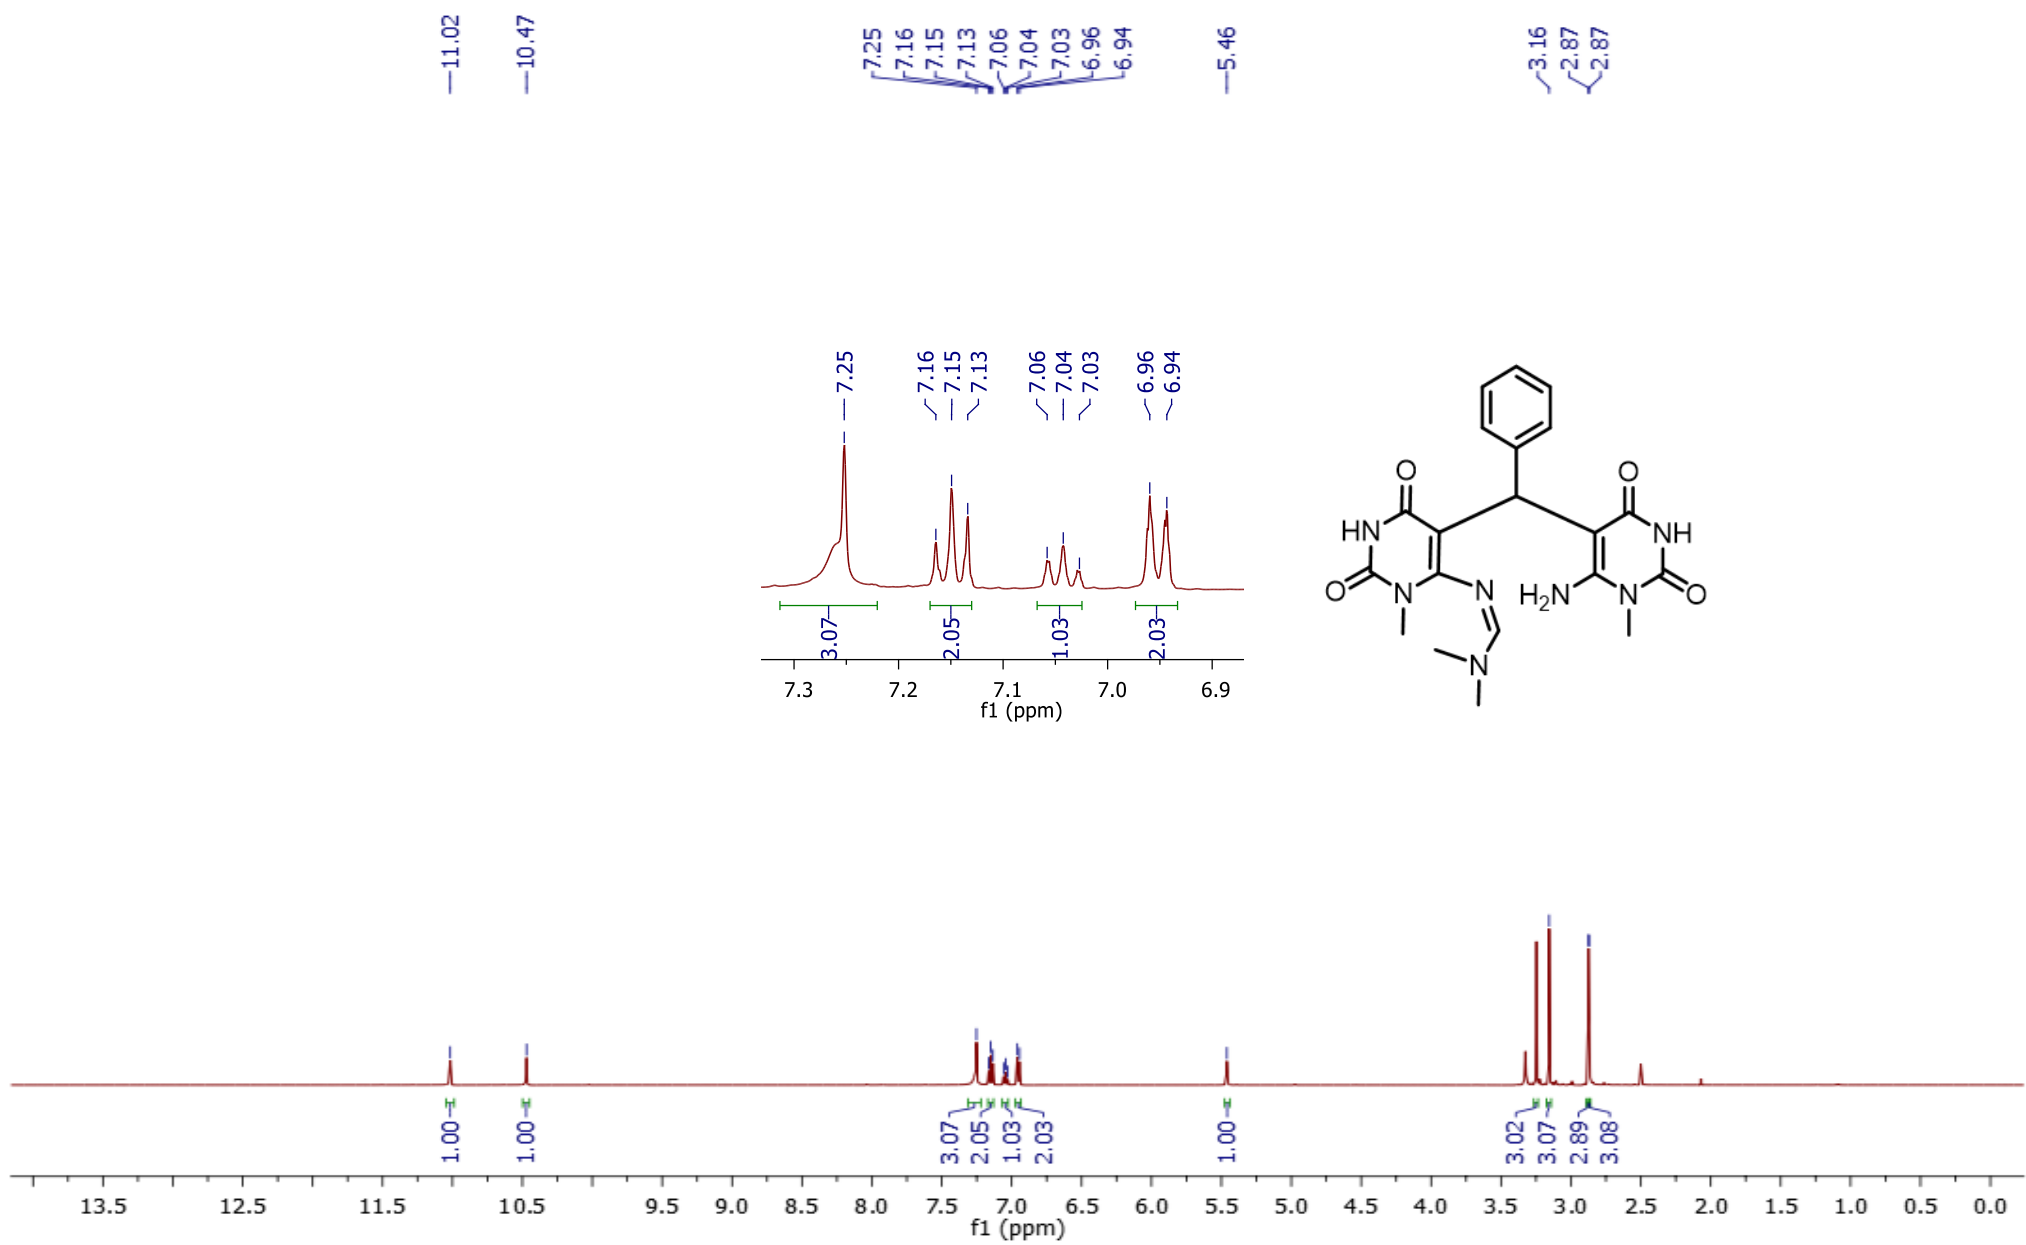

**Figure S79.** <sup>1</sup>H-NMR (DMSO-d<sub>6</sub>) spectra of compound **5ab**.

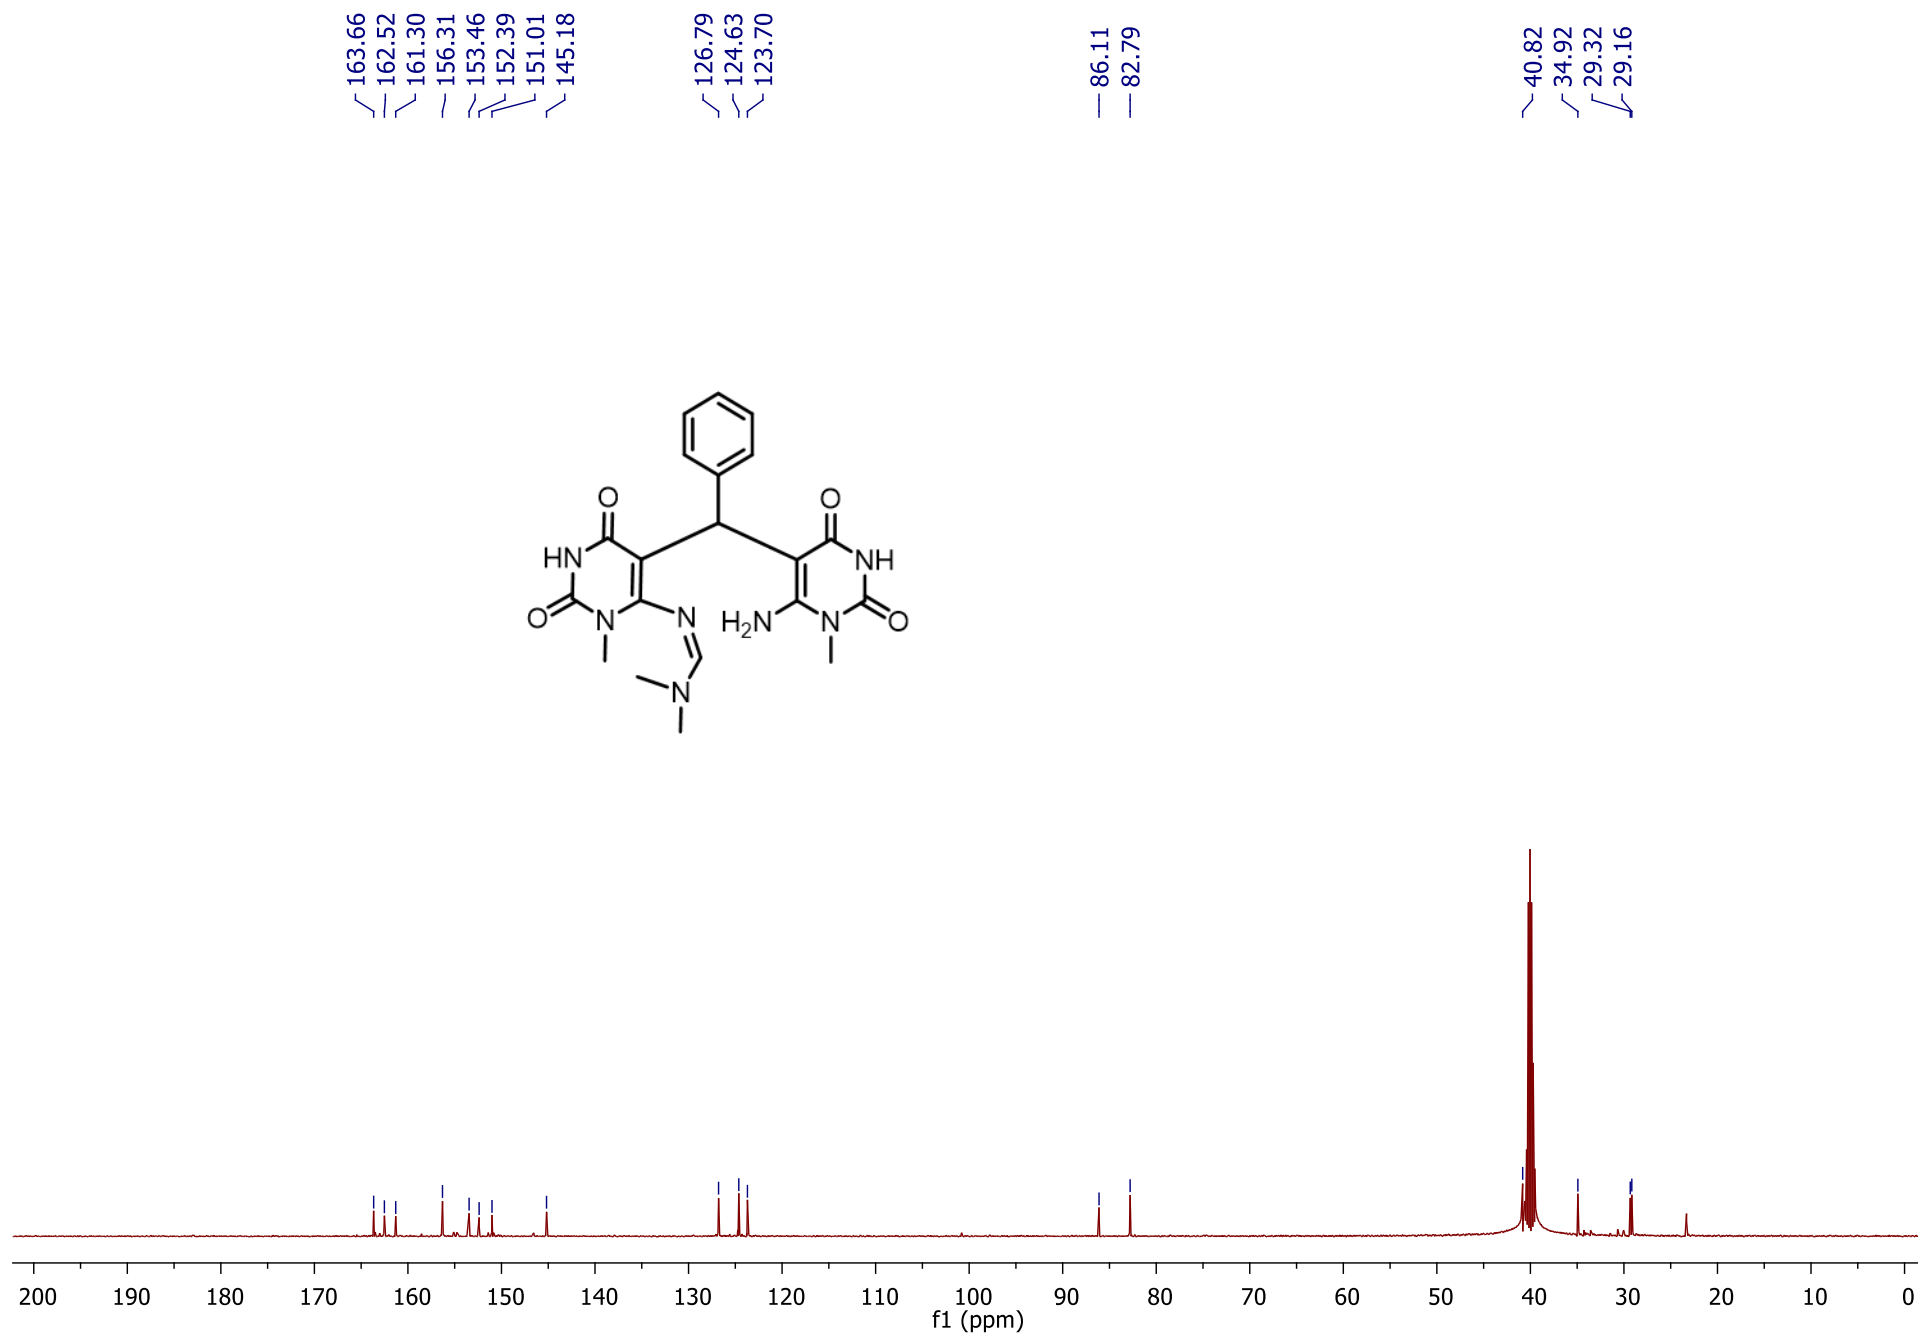

Figure S80.  $^{13}\text{C}$ -NMR (DMSO- $d_6$ ) spectra of compound **5ab**.

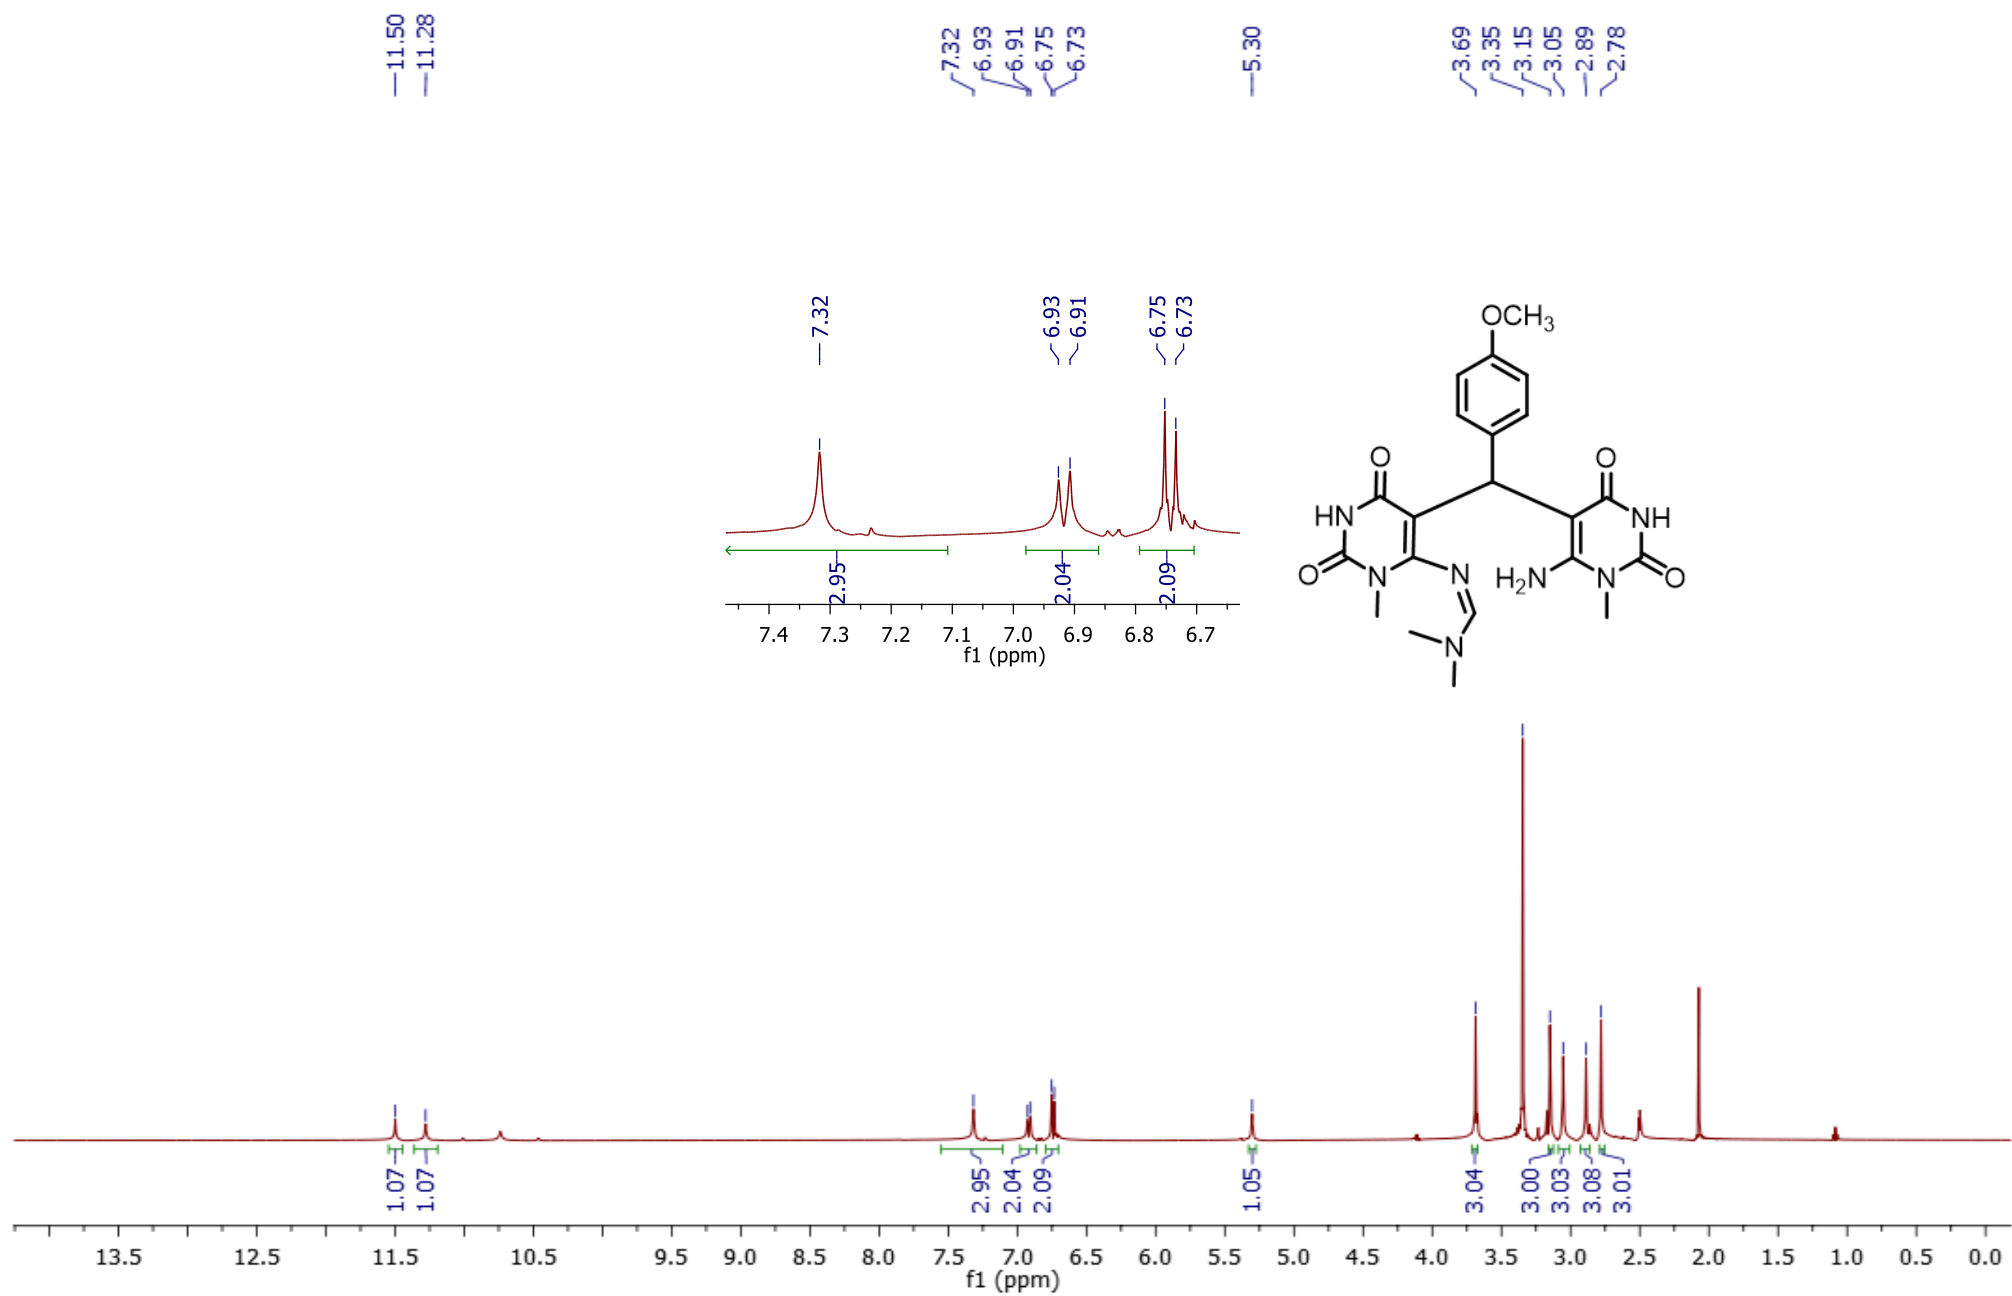

**Figure S81.**  $^1\text{H-NMR}$  (DMSO- $d_6$ ) spectra of compound **5ac**.

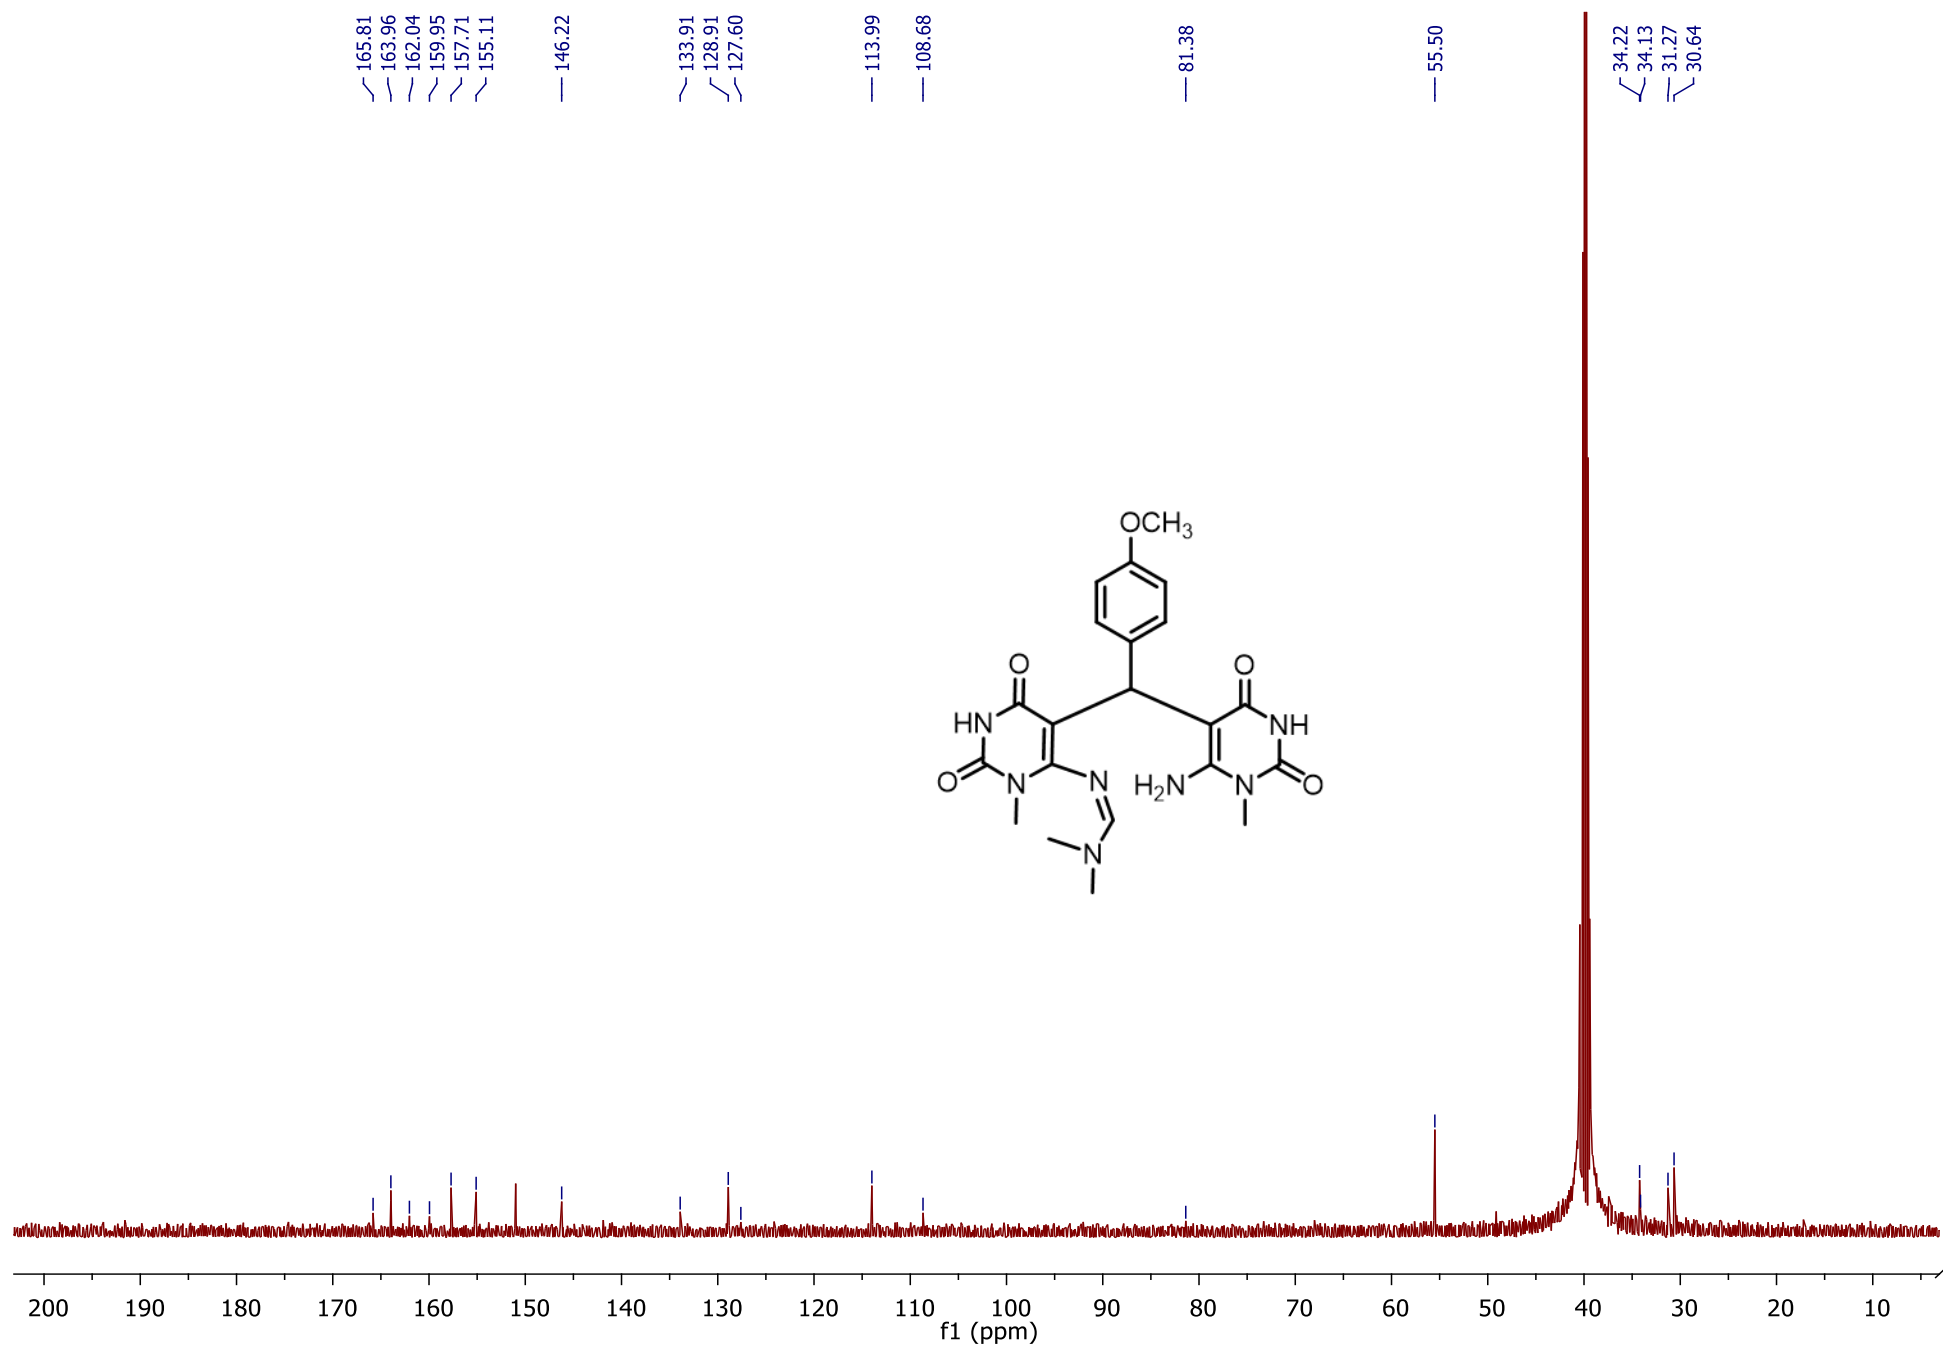

Figure S82.  $^{13}\text{C}$ -NMR (DMSO- $\text{d}_6$ ) spectra of compound **5ac**.

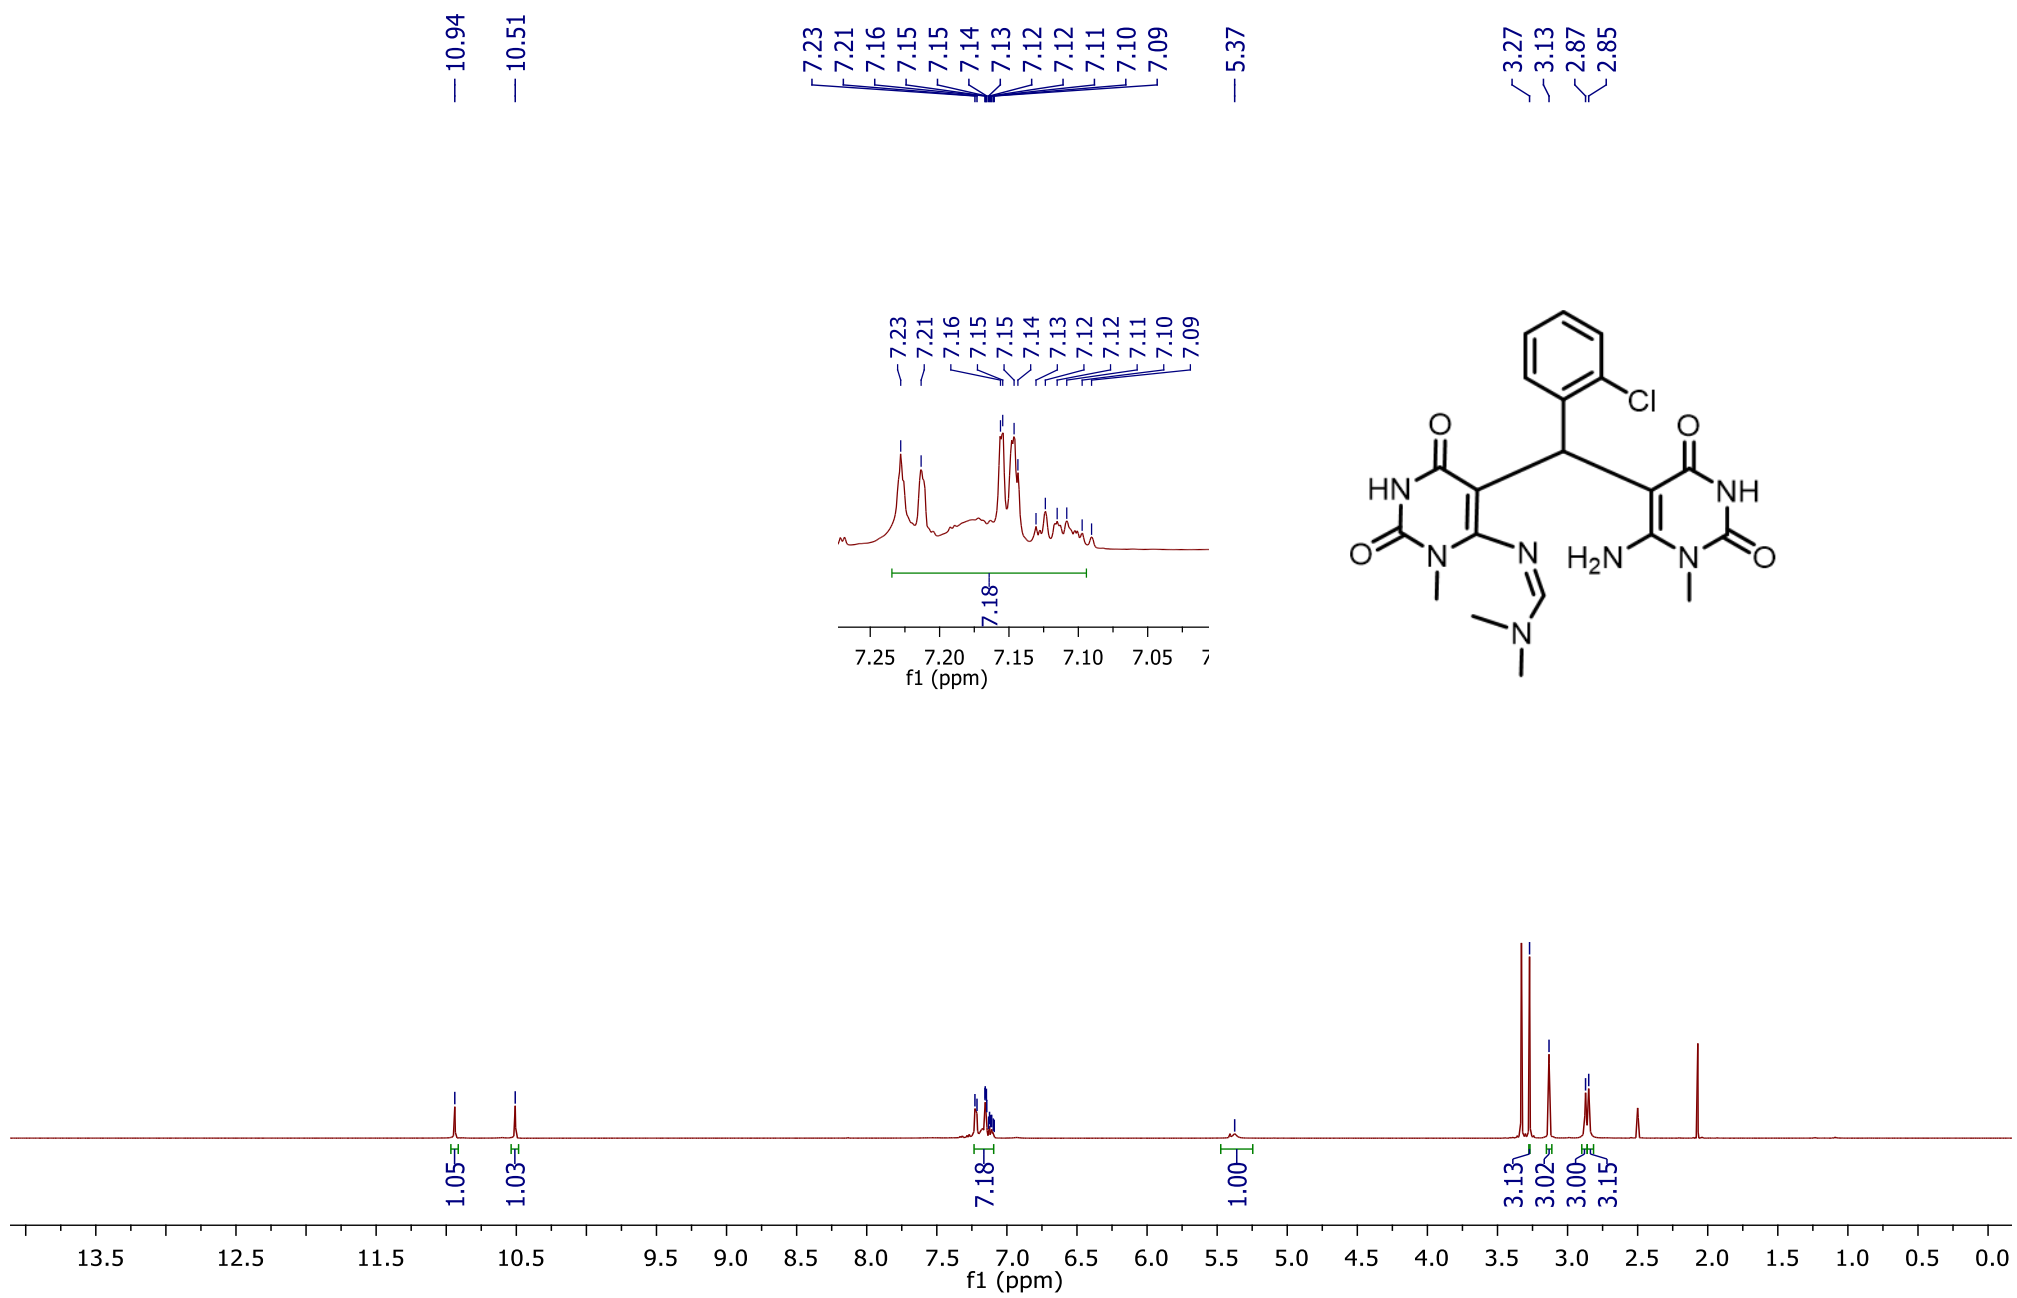

**Figure S83.**  $^1\text{H-NMR}$  ( $\text{DMSO-d}_6$ ) spectra of compound **5ad**.

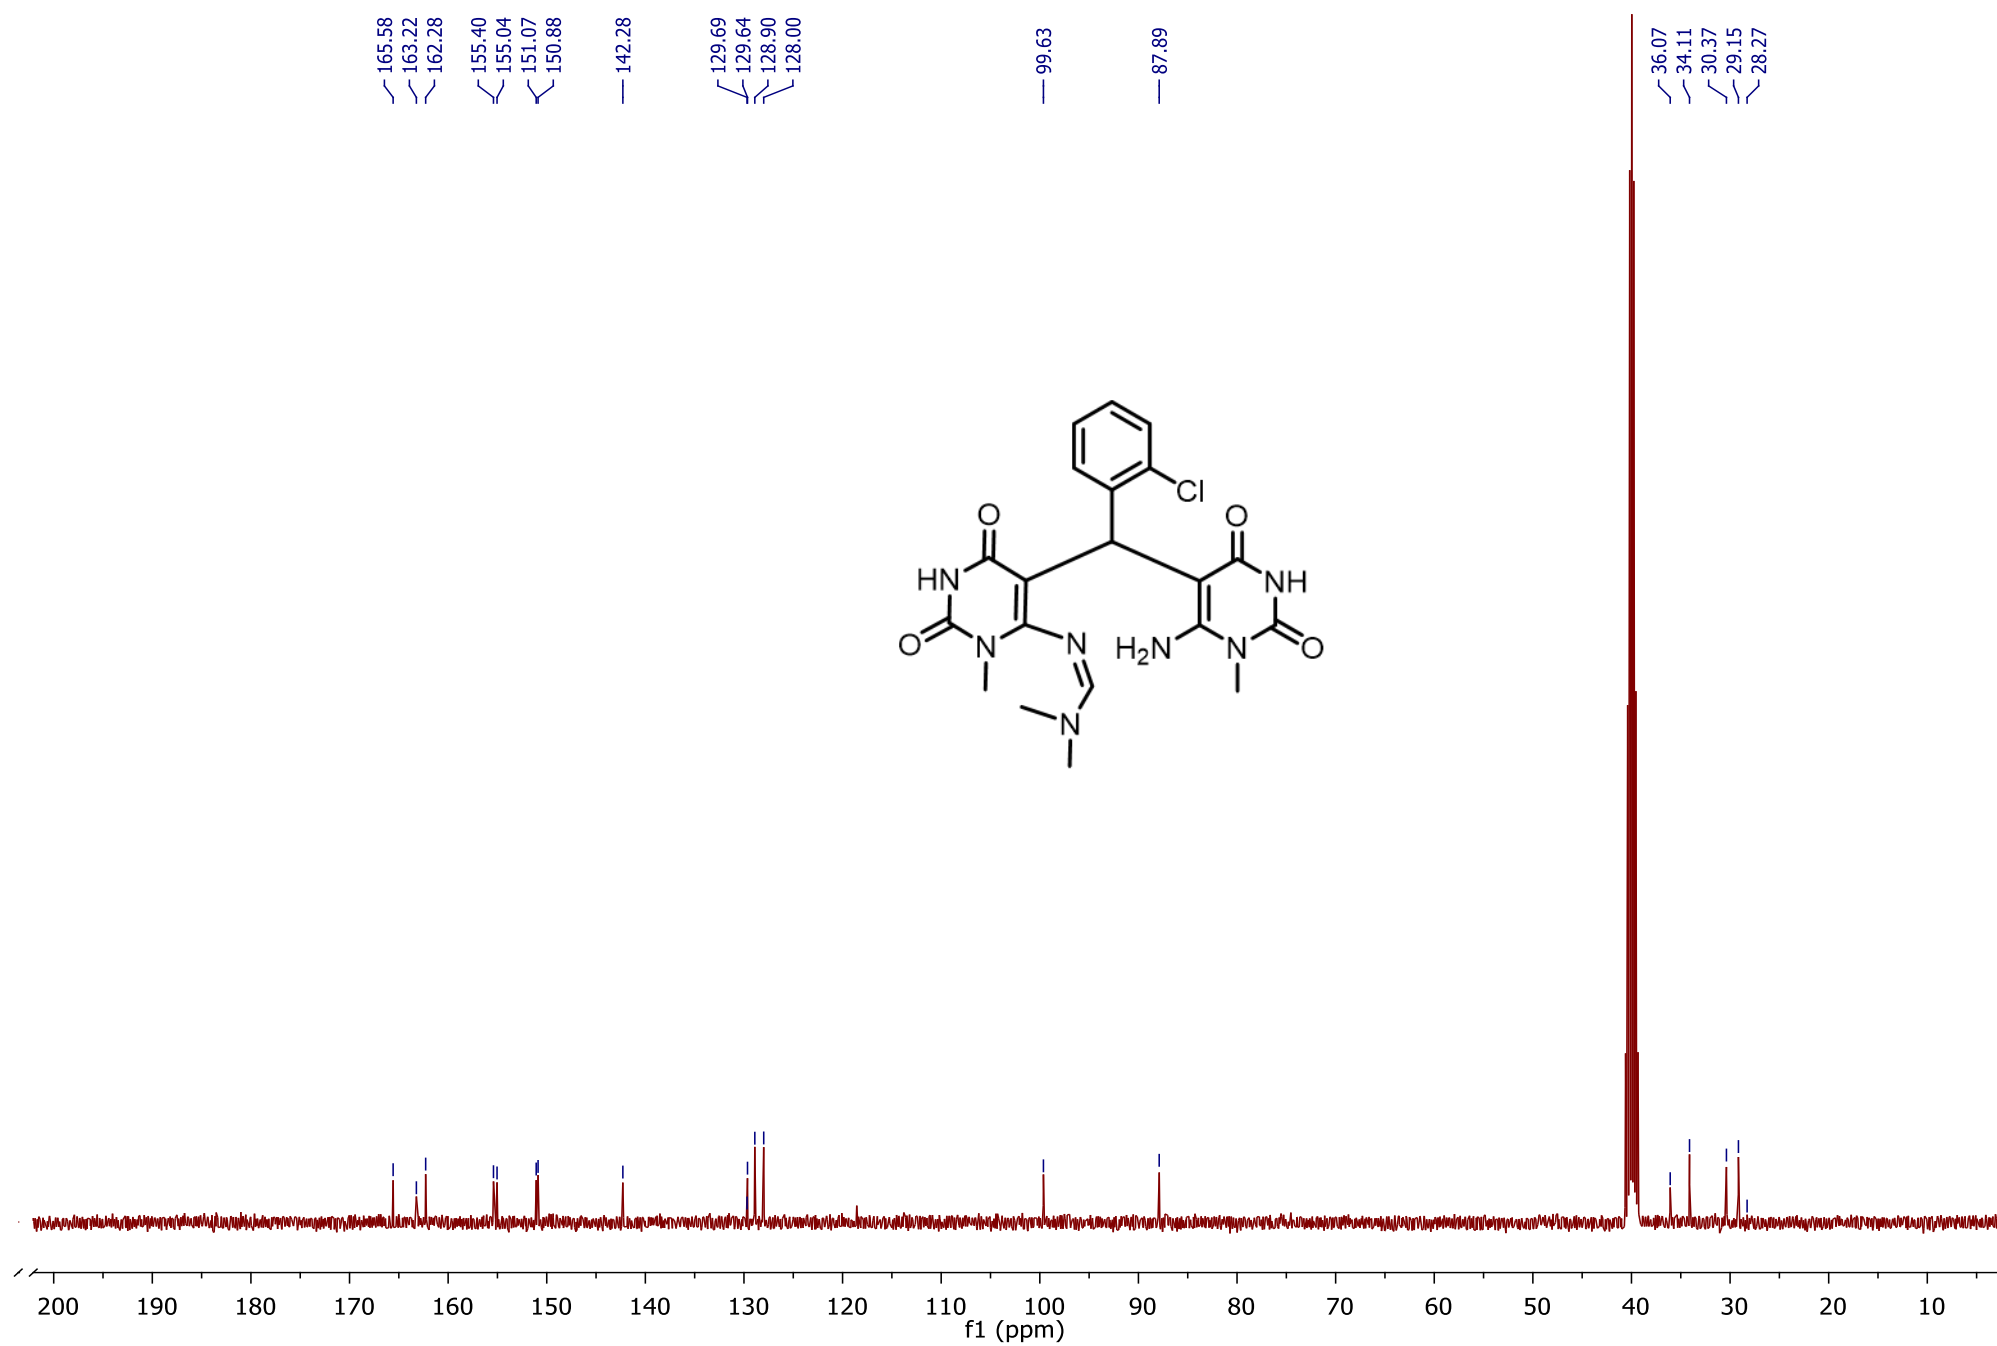

Figure S84.  $^{13}\text{C}$ -NMR (DMSO- $d_6$ ) spectra of compound **5ad**.

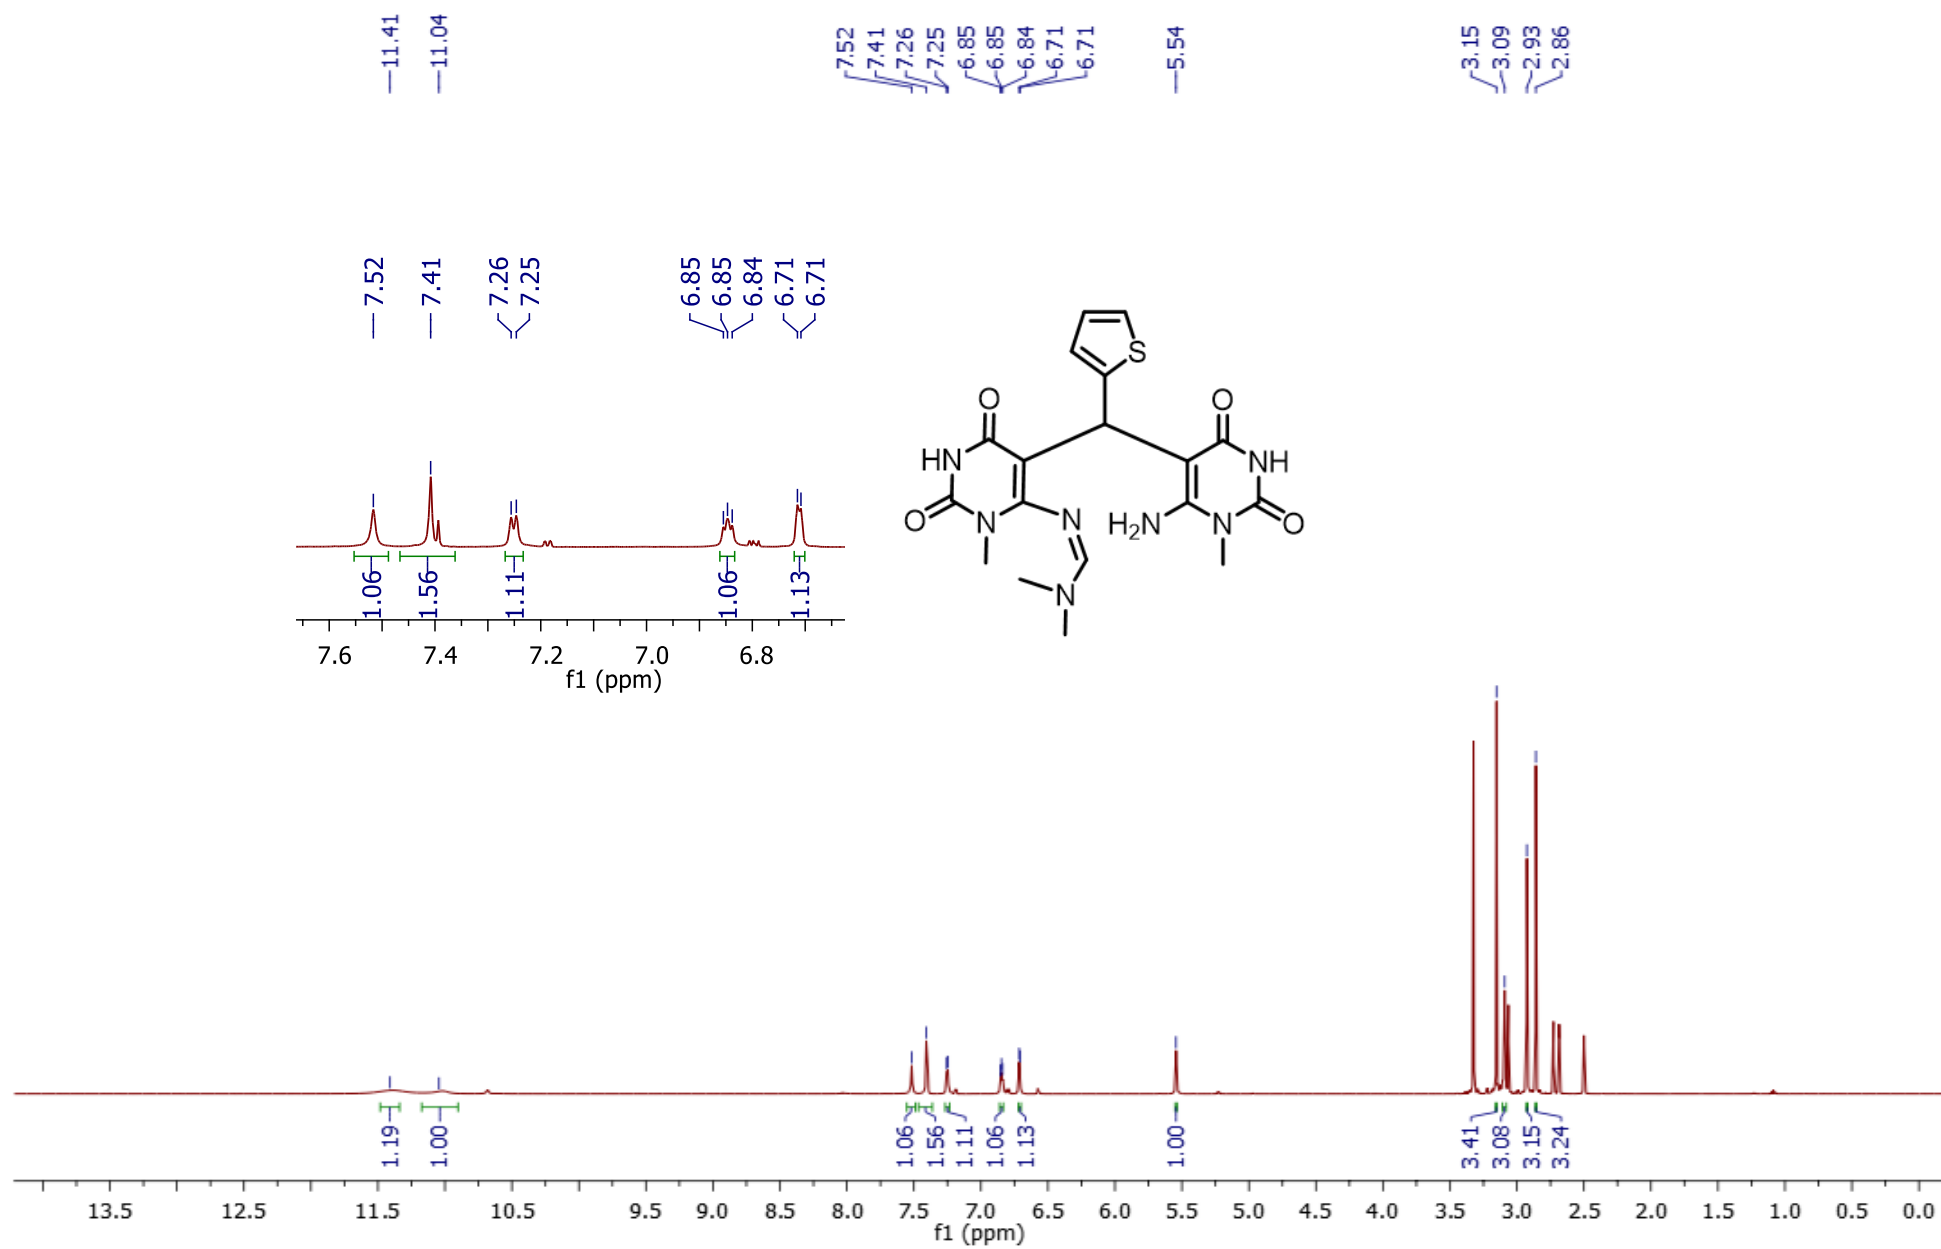

Figure S85.  $^1\text{H-NMR}$  (DMSO- $d_6$ ) spectra of compound **5ae**.

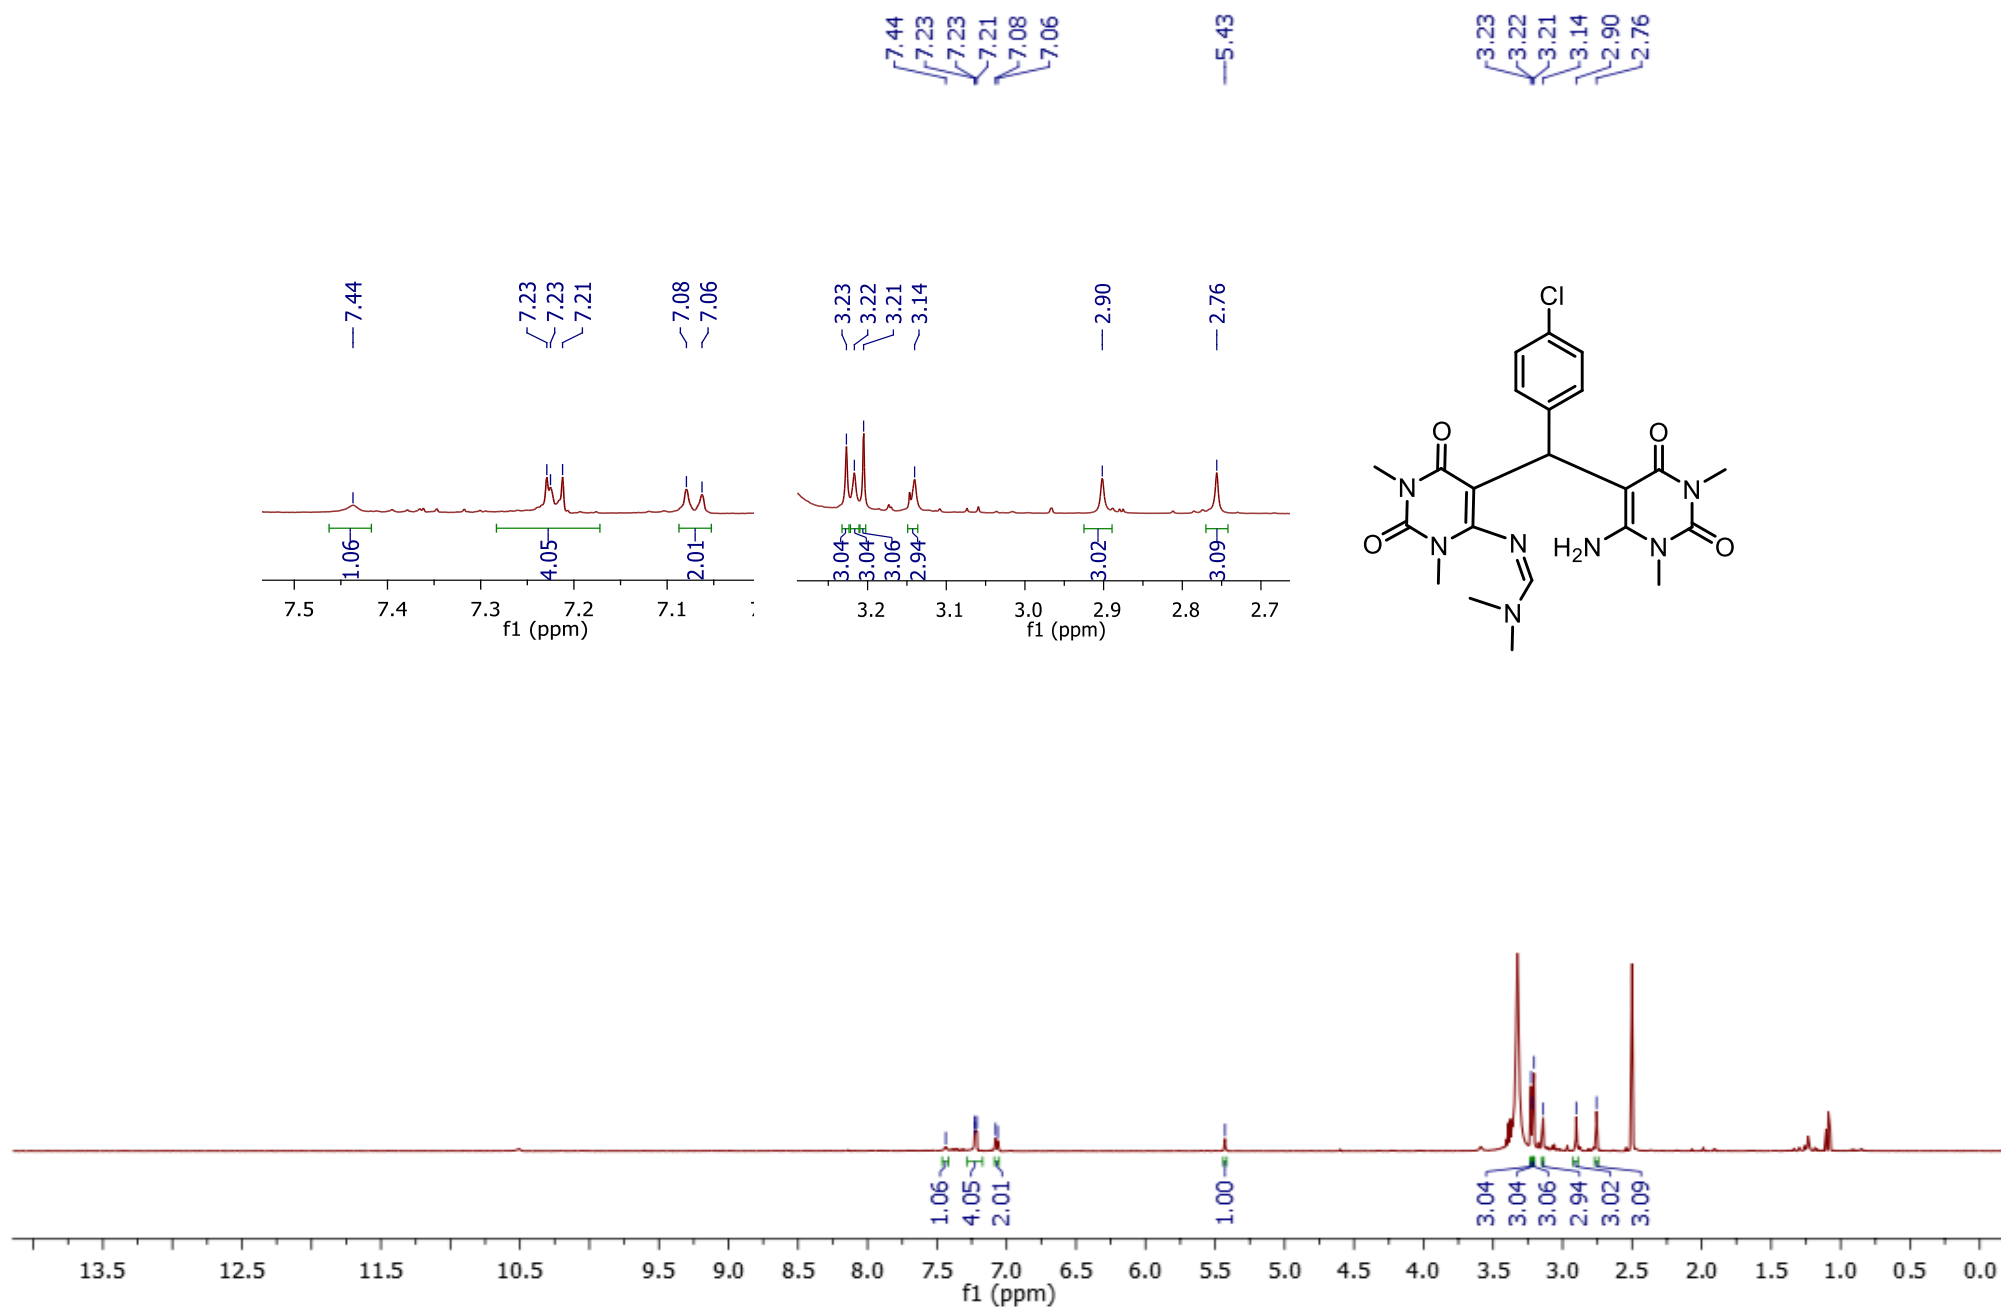

Figure S86. <sup>1</sup>H-NMR (DMSO-d<sub>6</sub>) spectra of compound **5ba**.

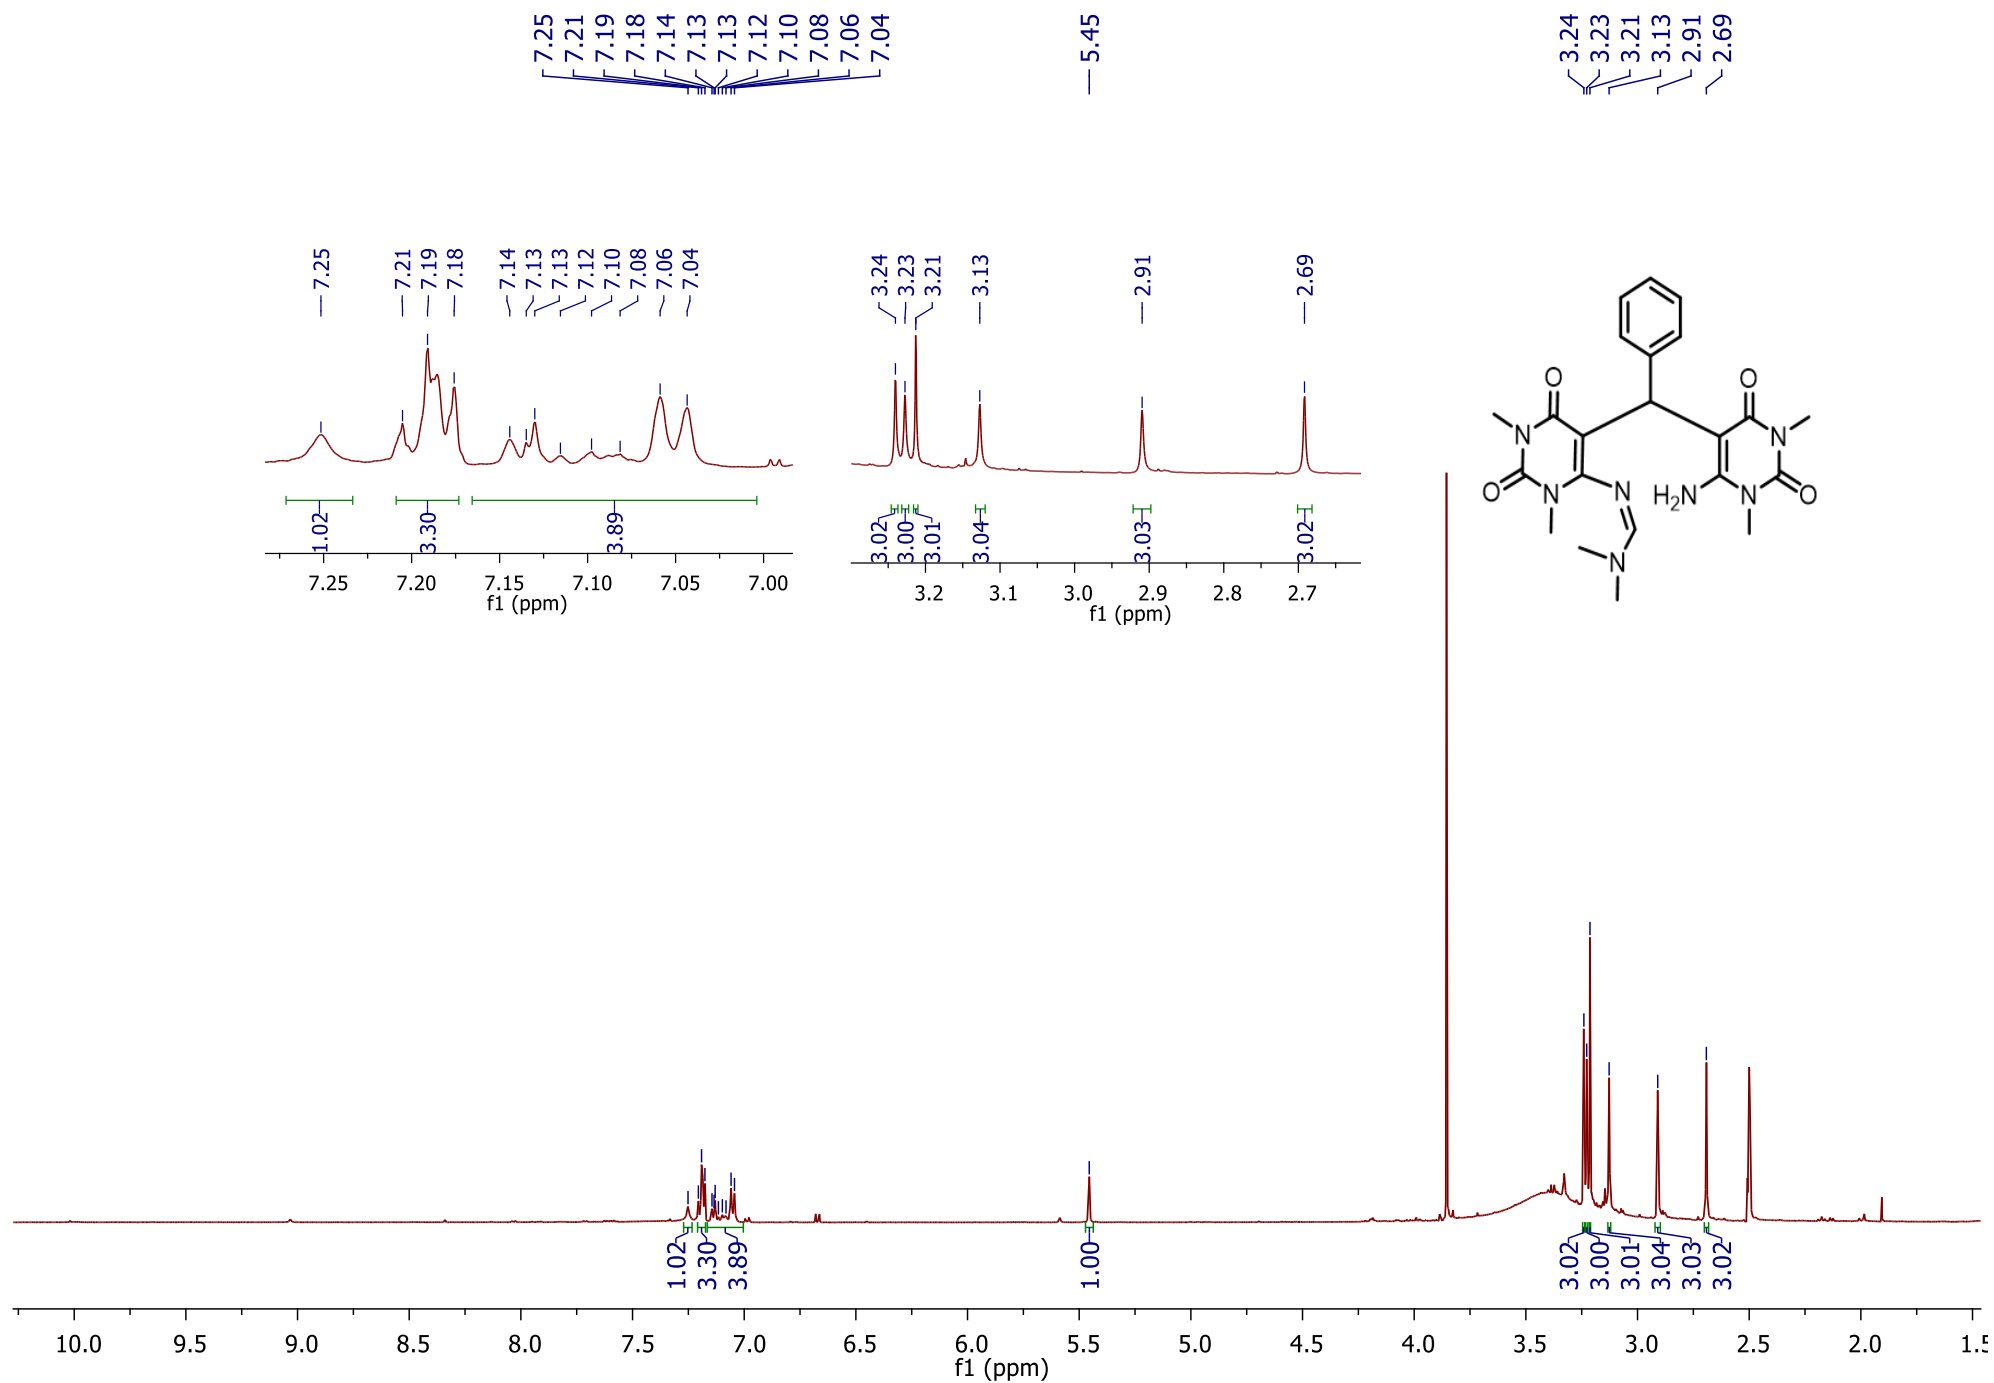

**Figure S87.** <sup>1</sup>H-NMR (DMSO-d<sub>6</sub>) spectra of compound **5bb**.

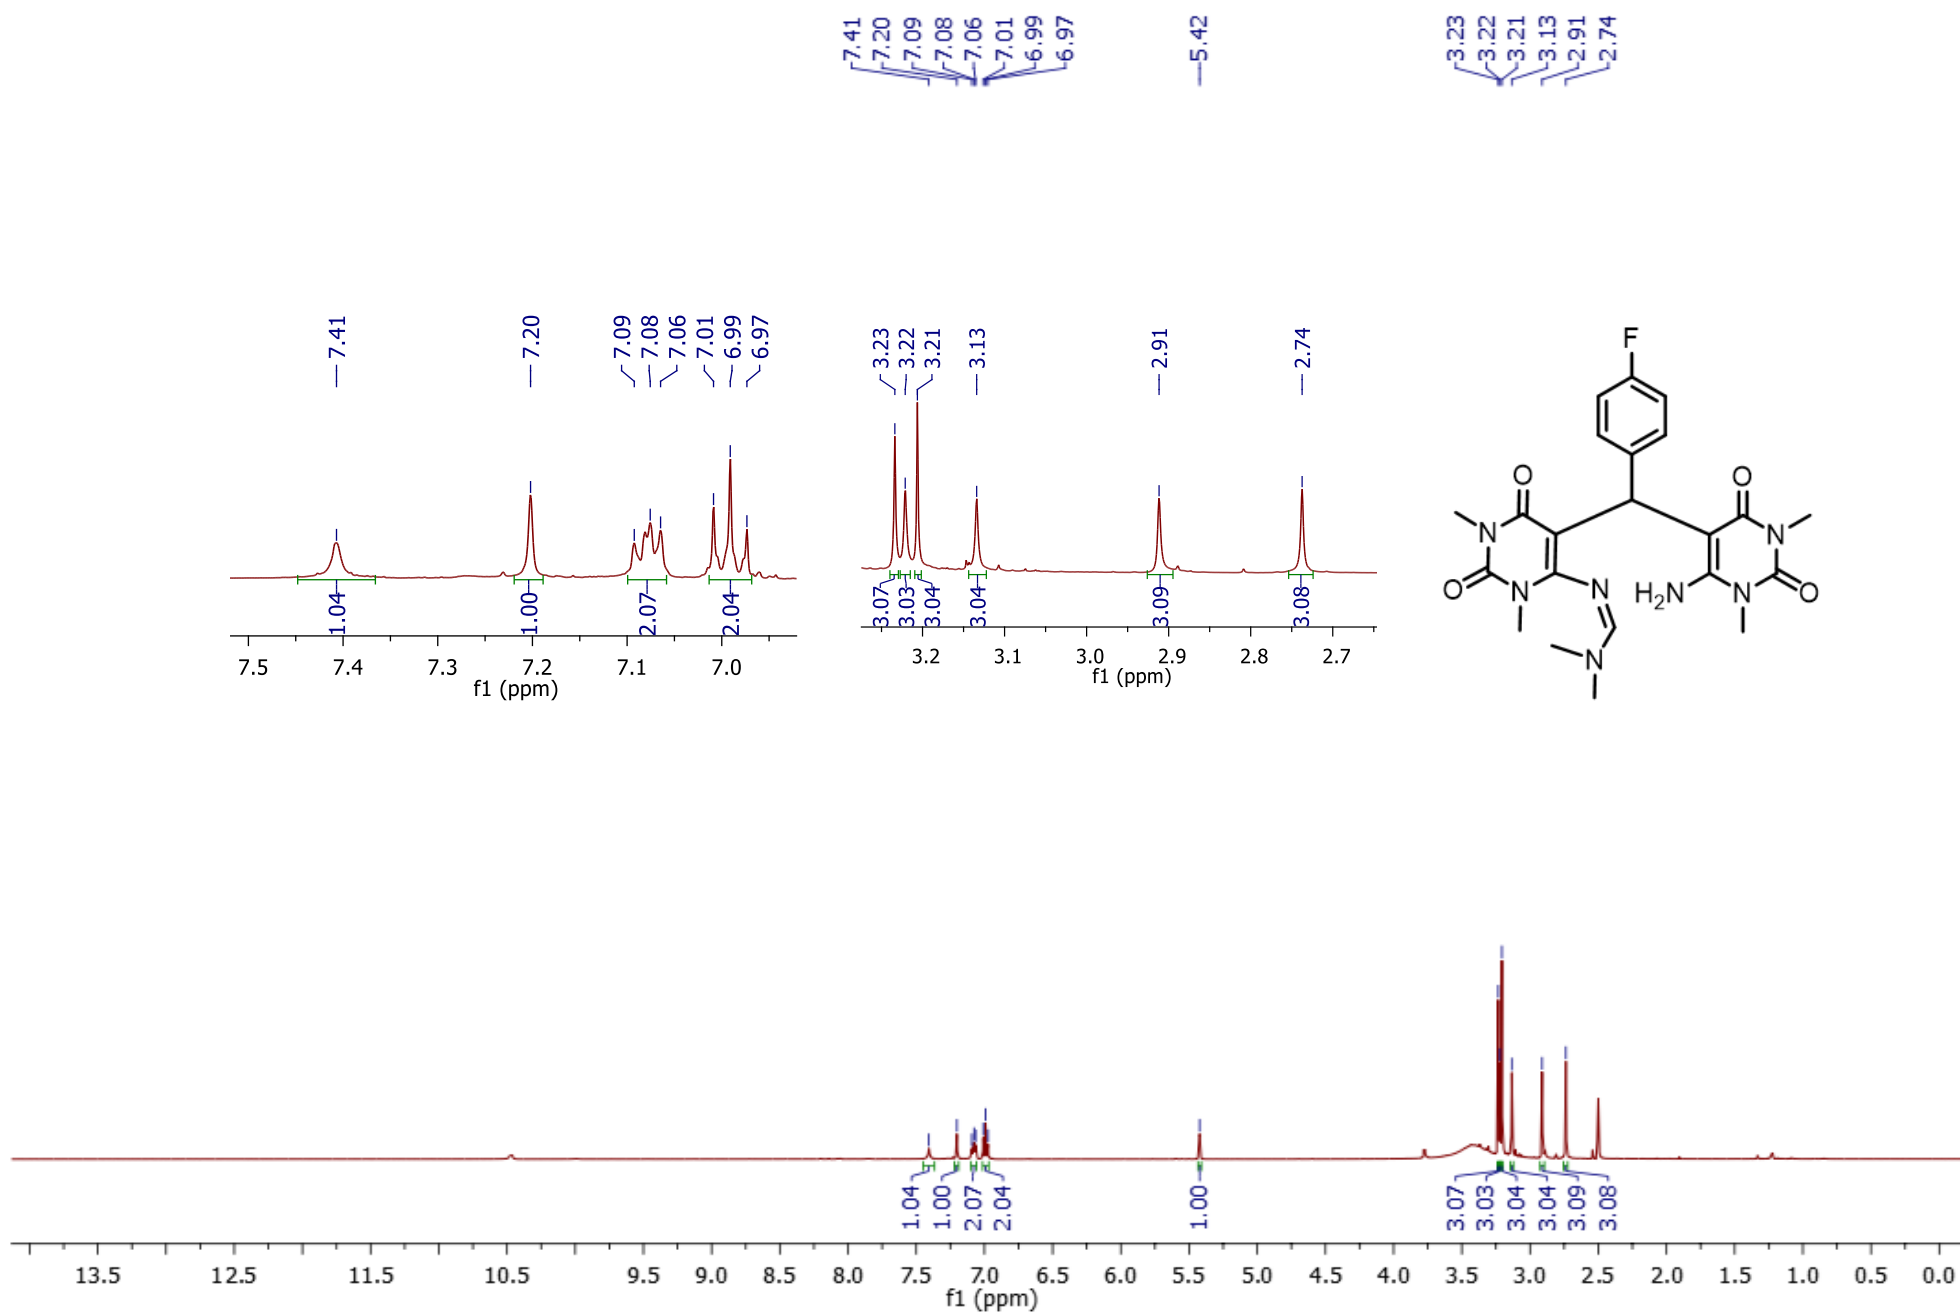

Figure S88. <sup>1</sup>H-NMR (DMSO-d<sub>6</sub>) spectra of compound **5bc**.

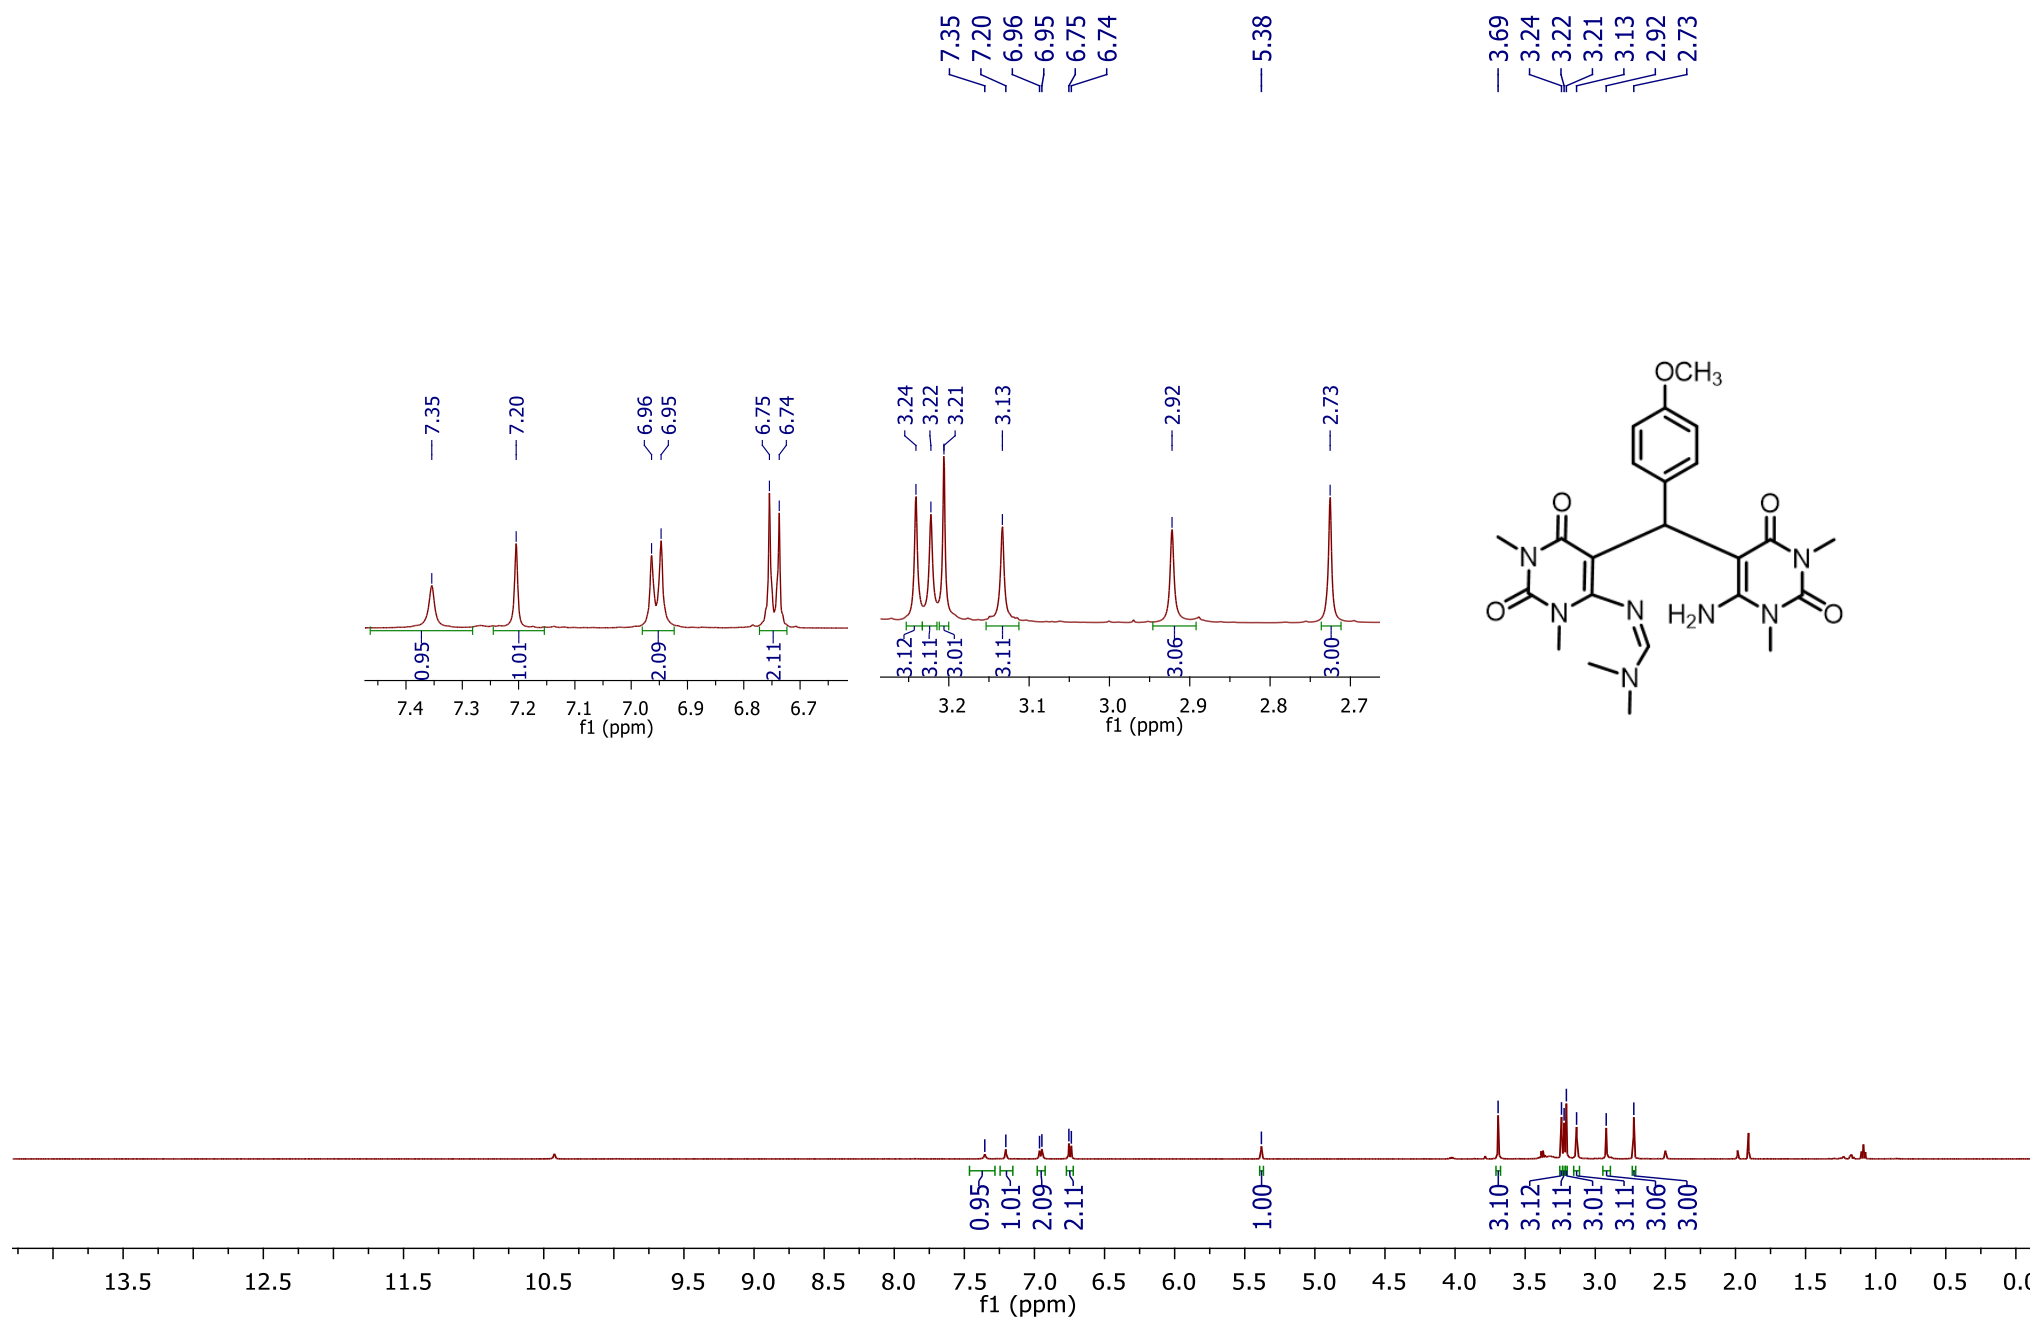

**Figure S89.** <sup>1</sup>H-NMR (DMSO-d<sub>6</sub>) spectra of compound **5bd**.

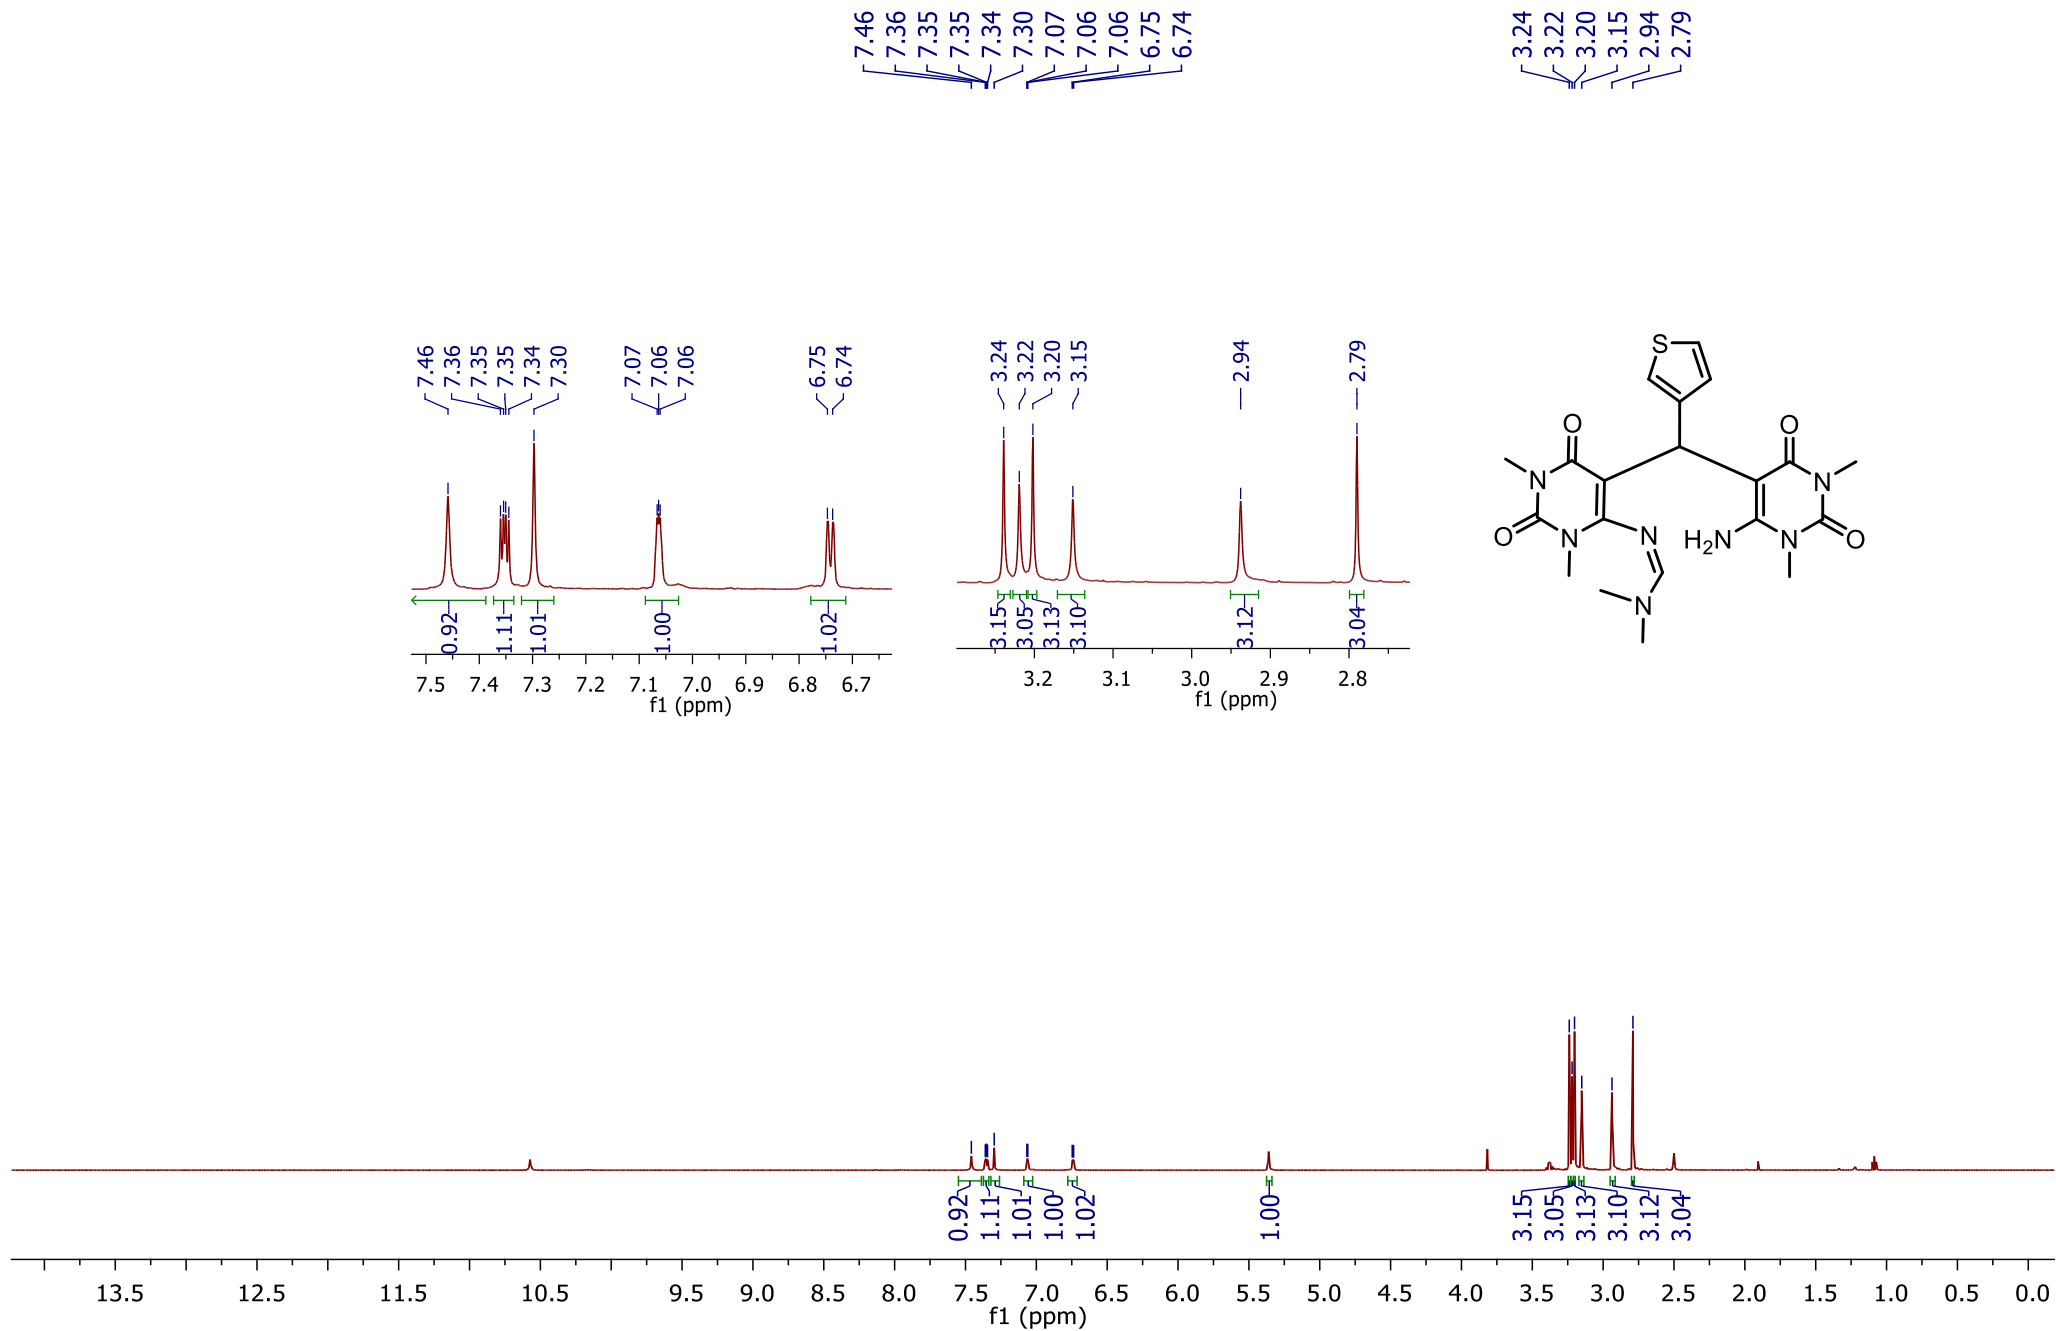

Figure S90. <sup>1</sup>H-NMR (DMSO-d<sub>6</sub>) spectra of compound **5be**.

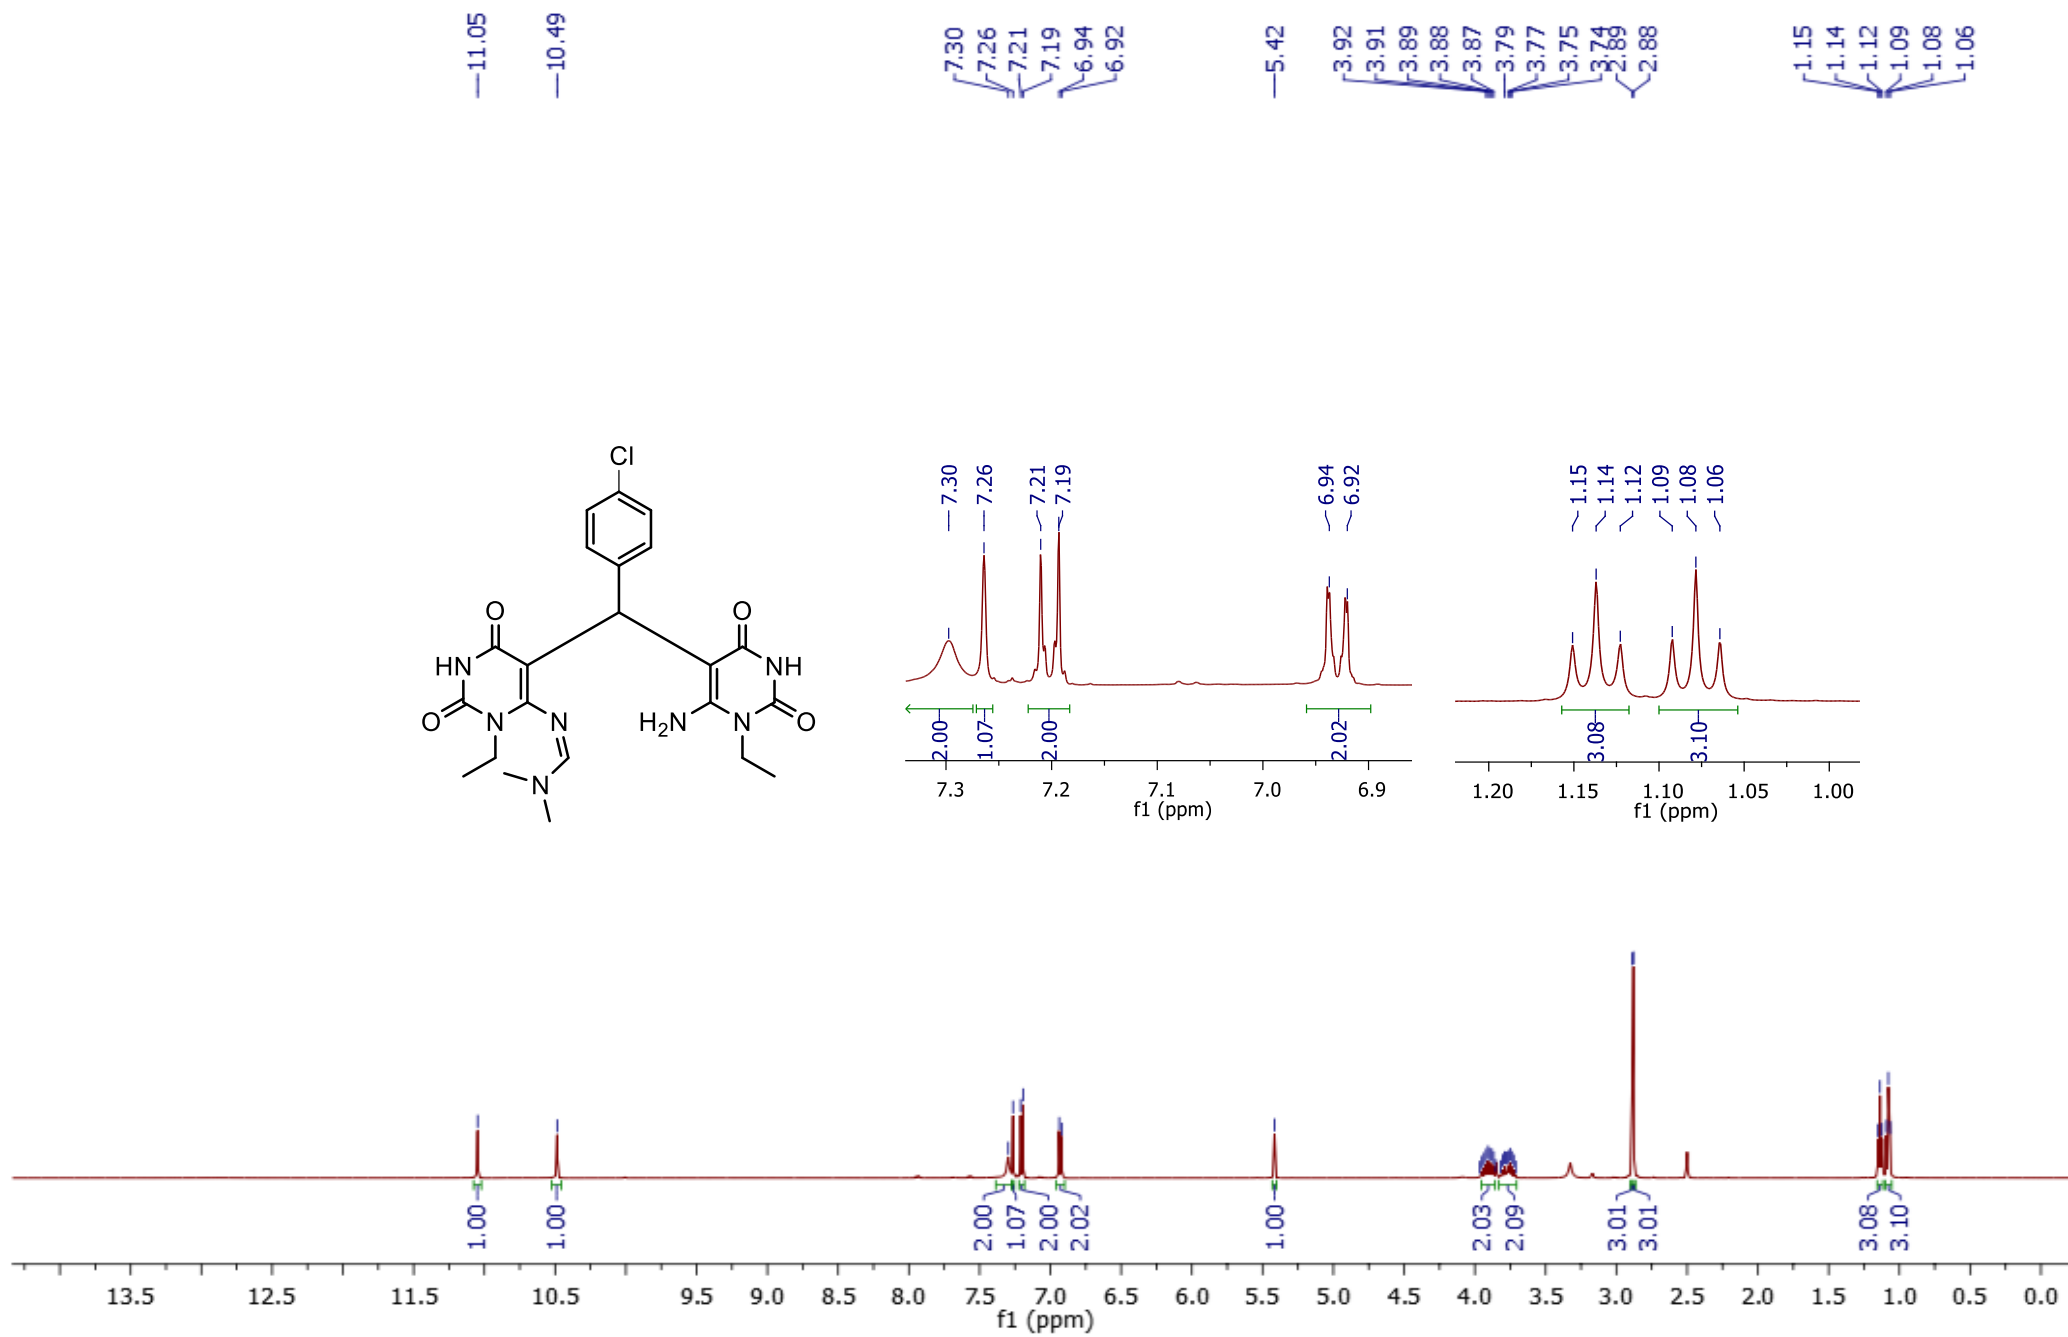

Figure S91.  $^1\text{H-NMR}$  (DMSO- $d_6$ ) spectra of compound **5ca**.

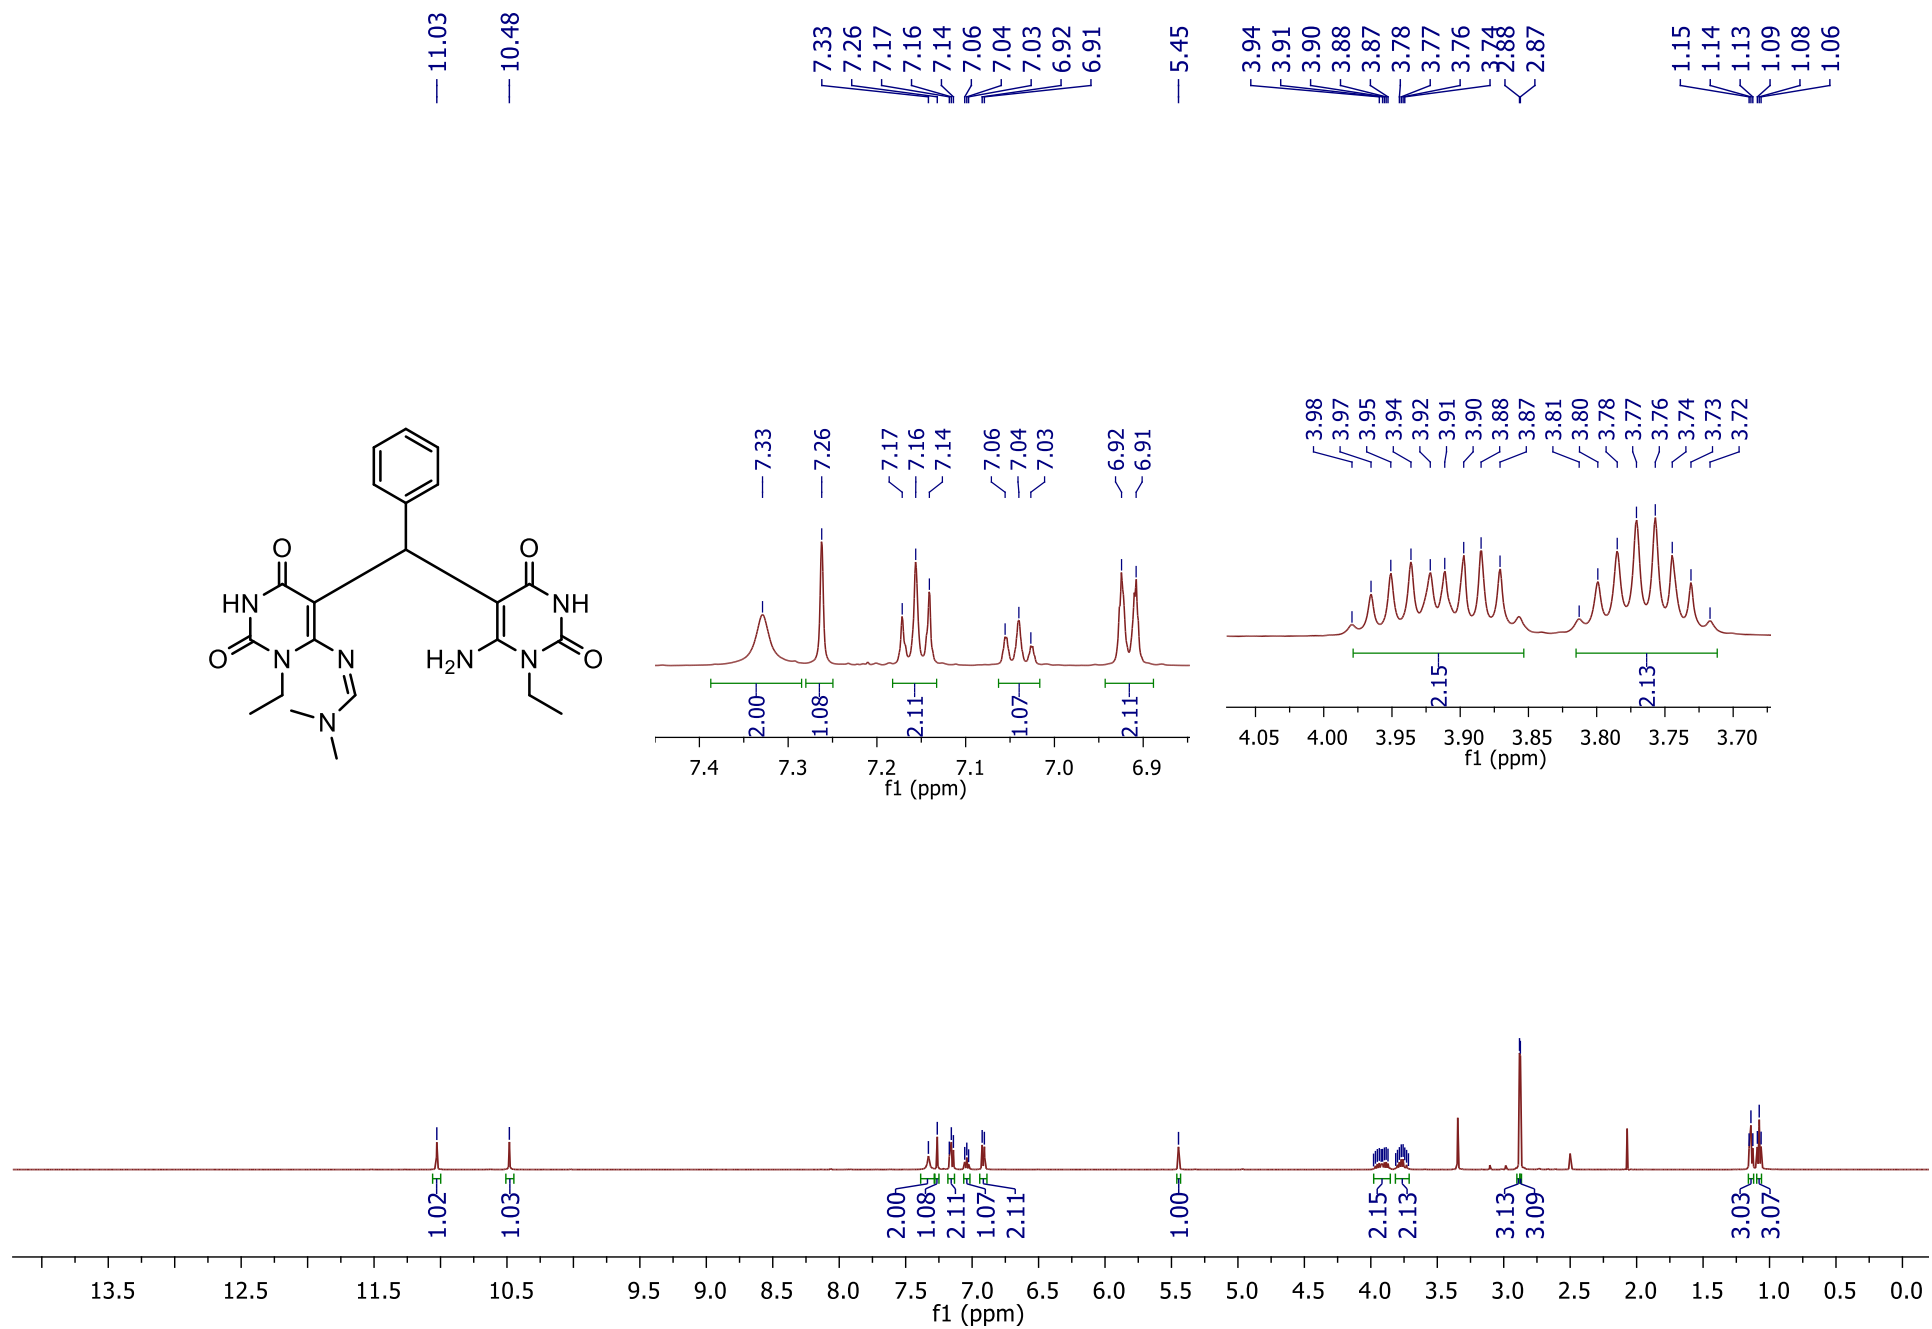

Figure S92. <sup>1</sup>H-NMR (DMSO-d<sub>6</sub>) spectra of compound **5cb**.

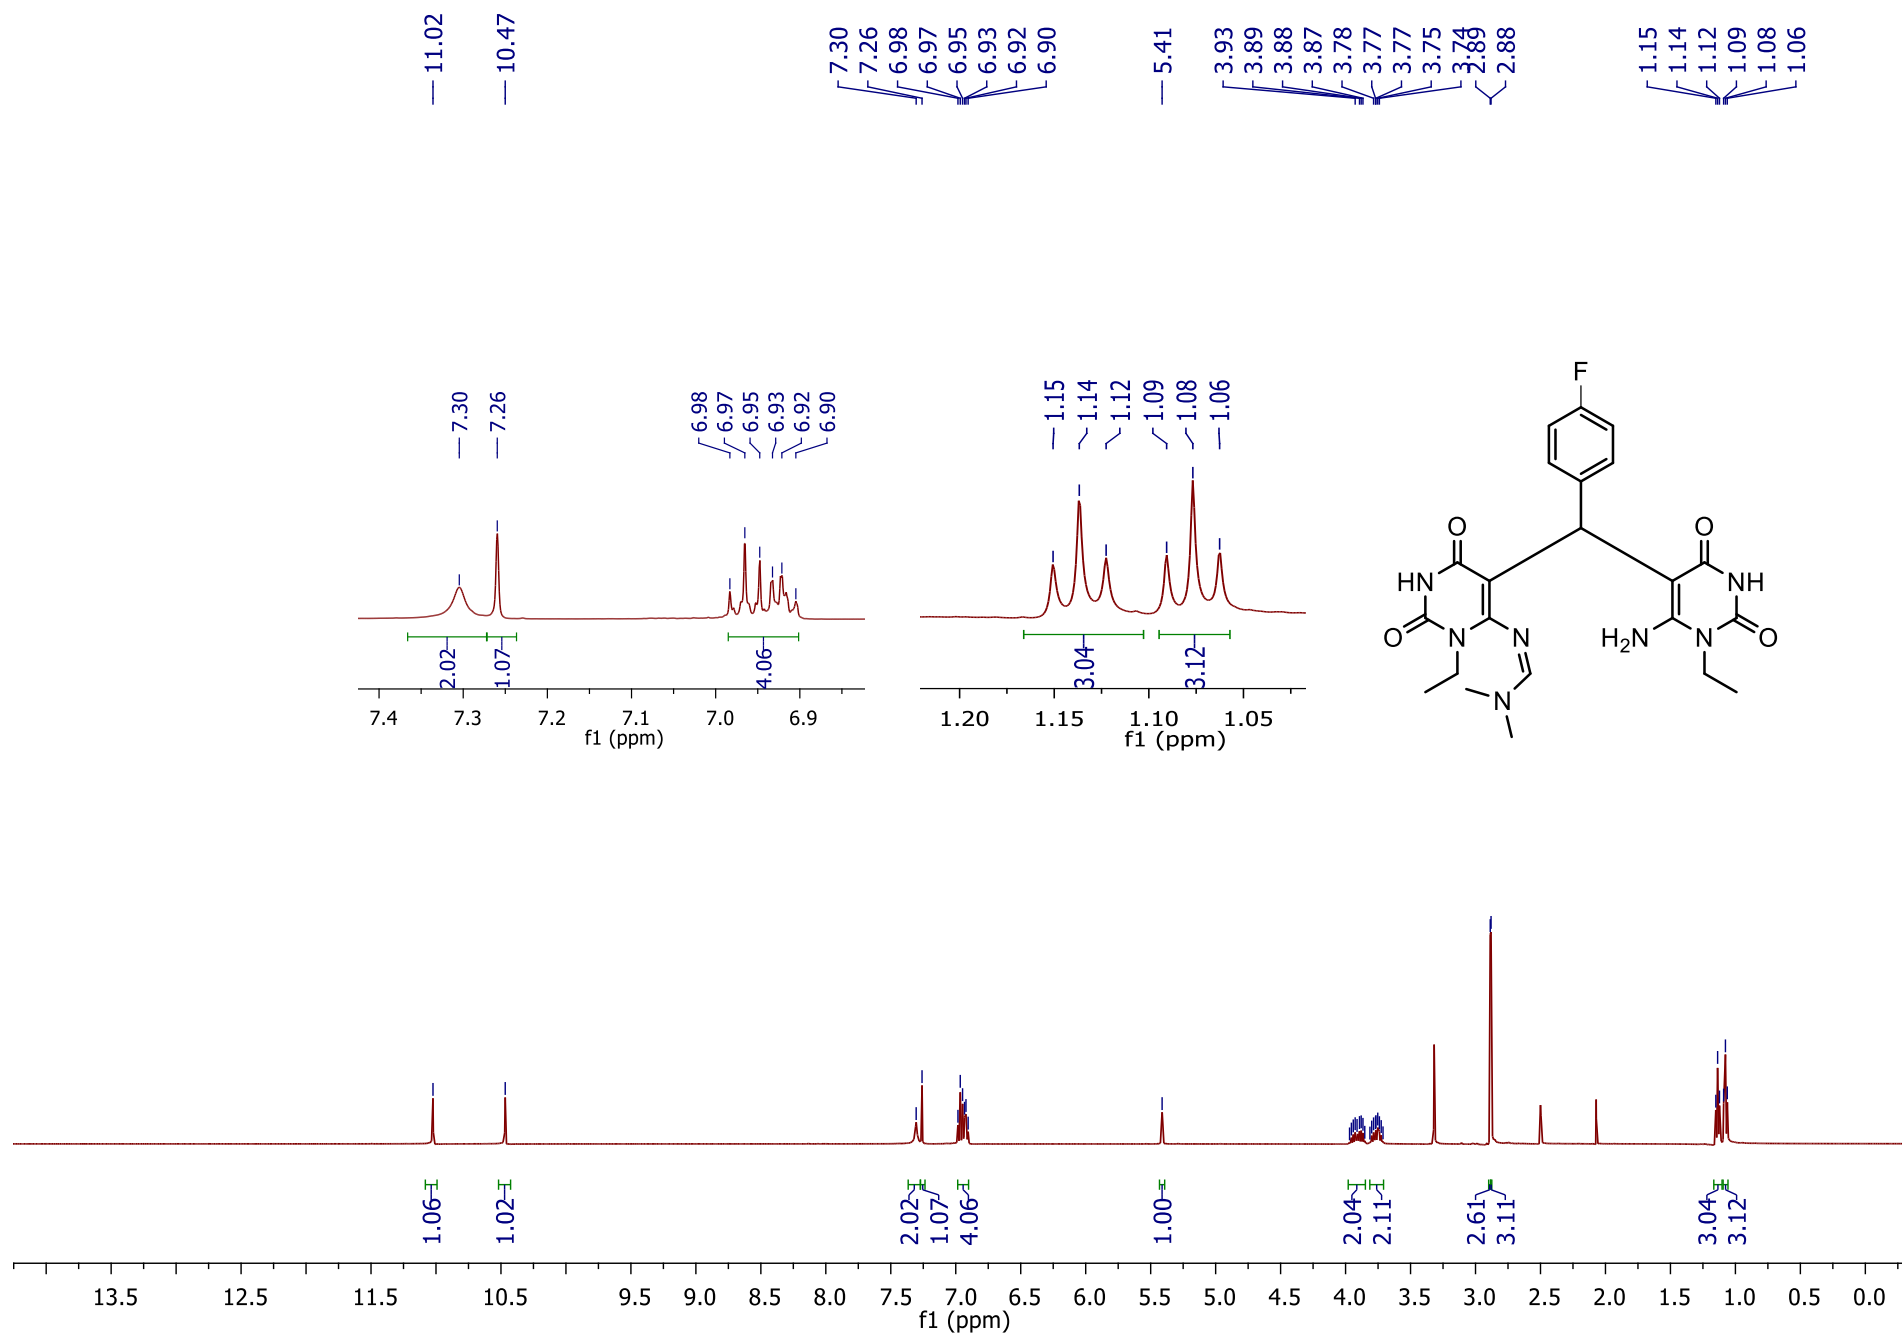

**Figure S93.** <sup>1</sup>H-NMR (DMSO-d<sub>6</sub>) spectra of compound **5cc**.

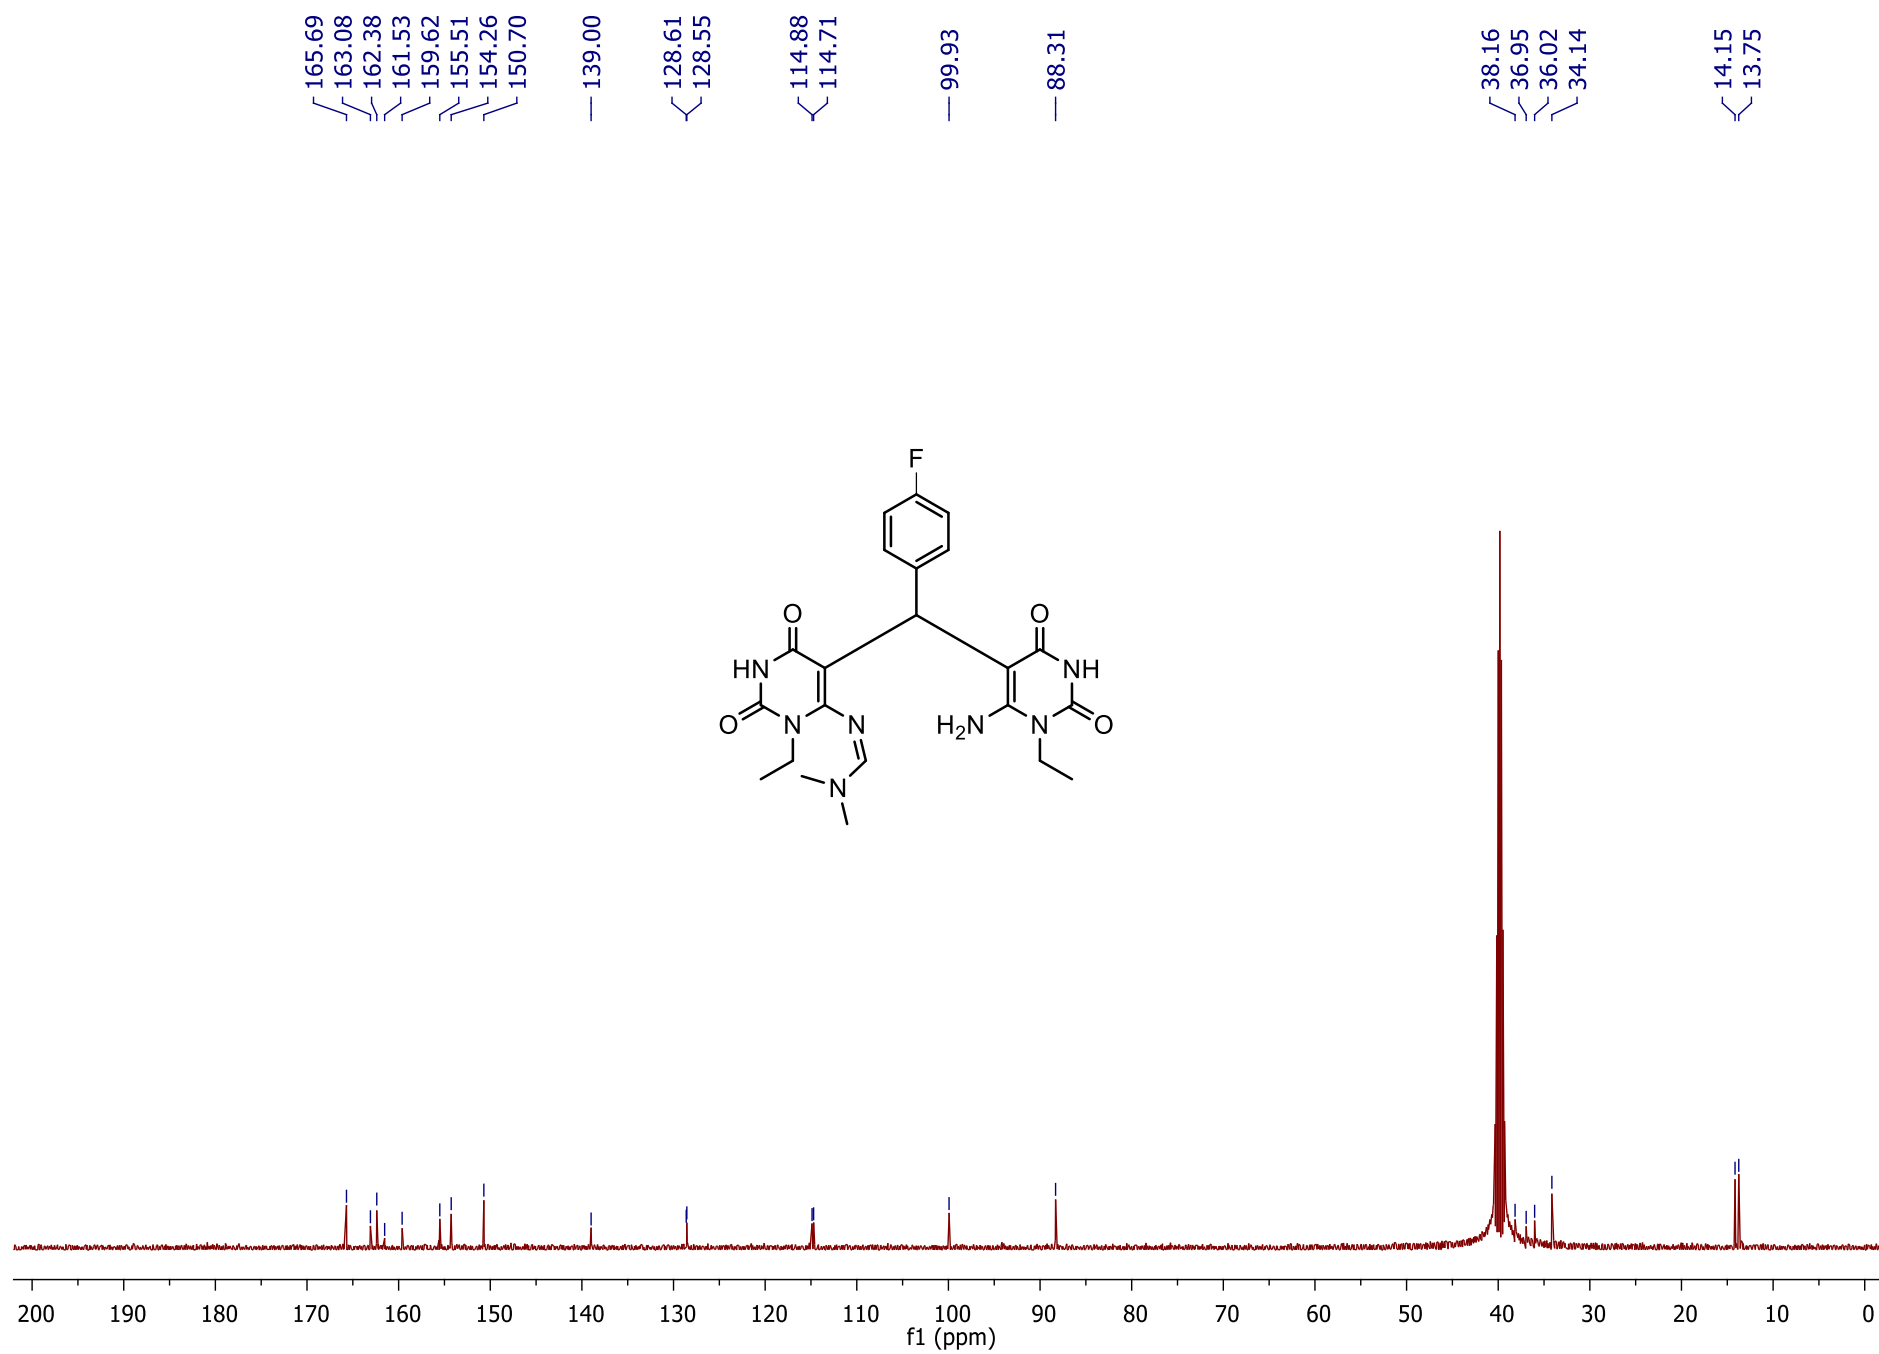

Figure S94. <sup>13</sup>C-NMR (DMSO-d<sub>6</sub>) spectra of compound 5cc.

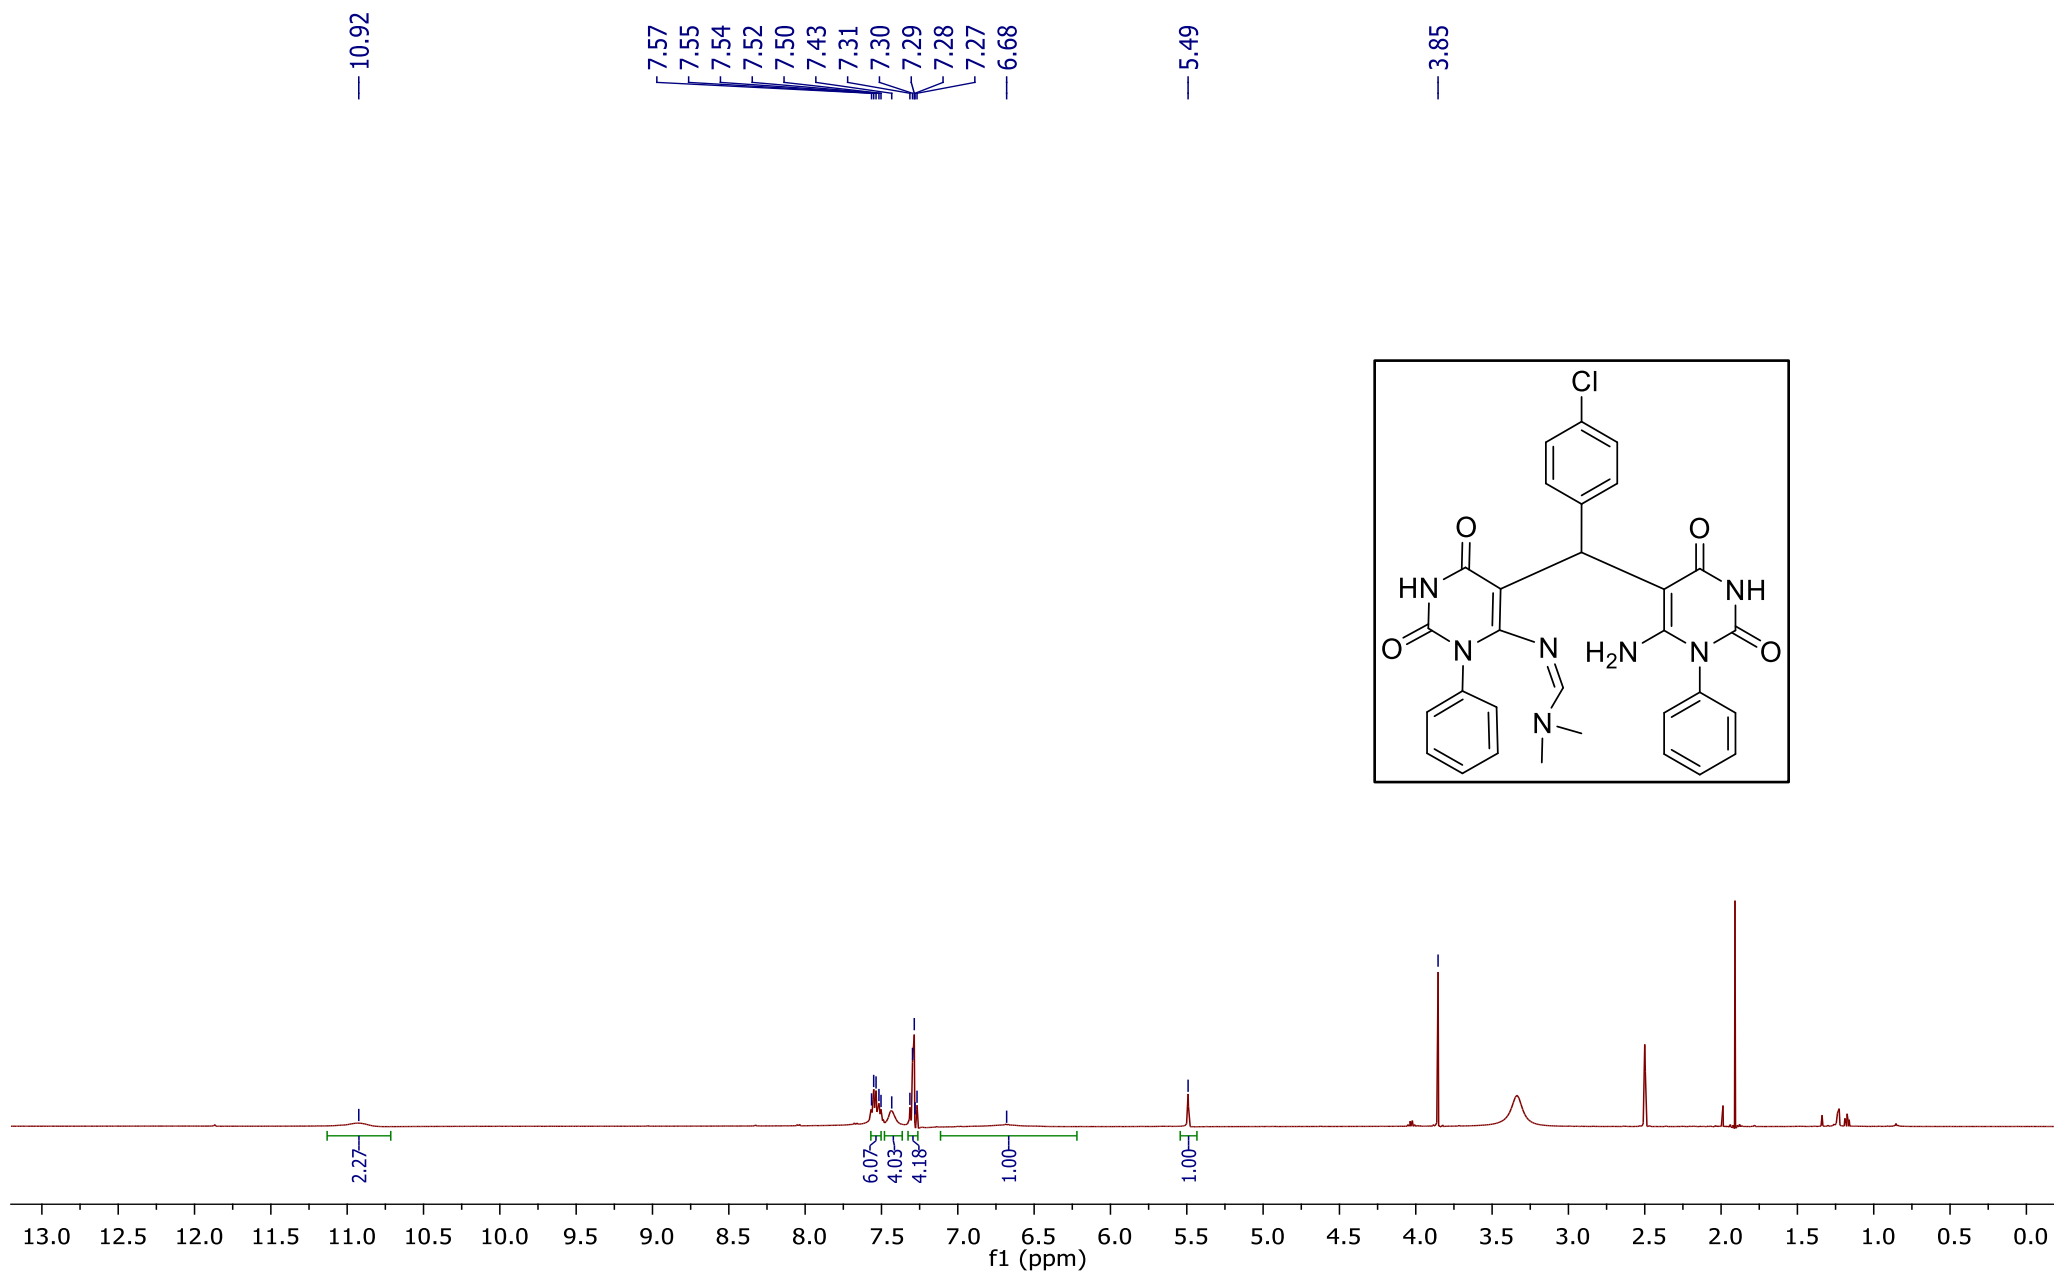

Figure S95. <sup>1</sup>H-NMR (DMSO-d<sub>6</sub>) spectra of compound **5da**.

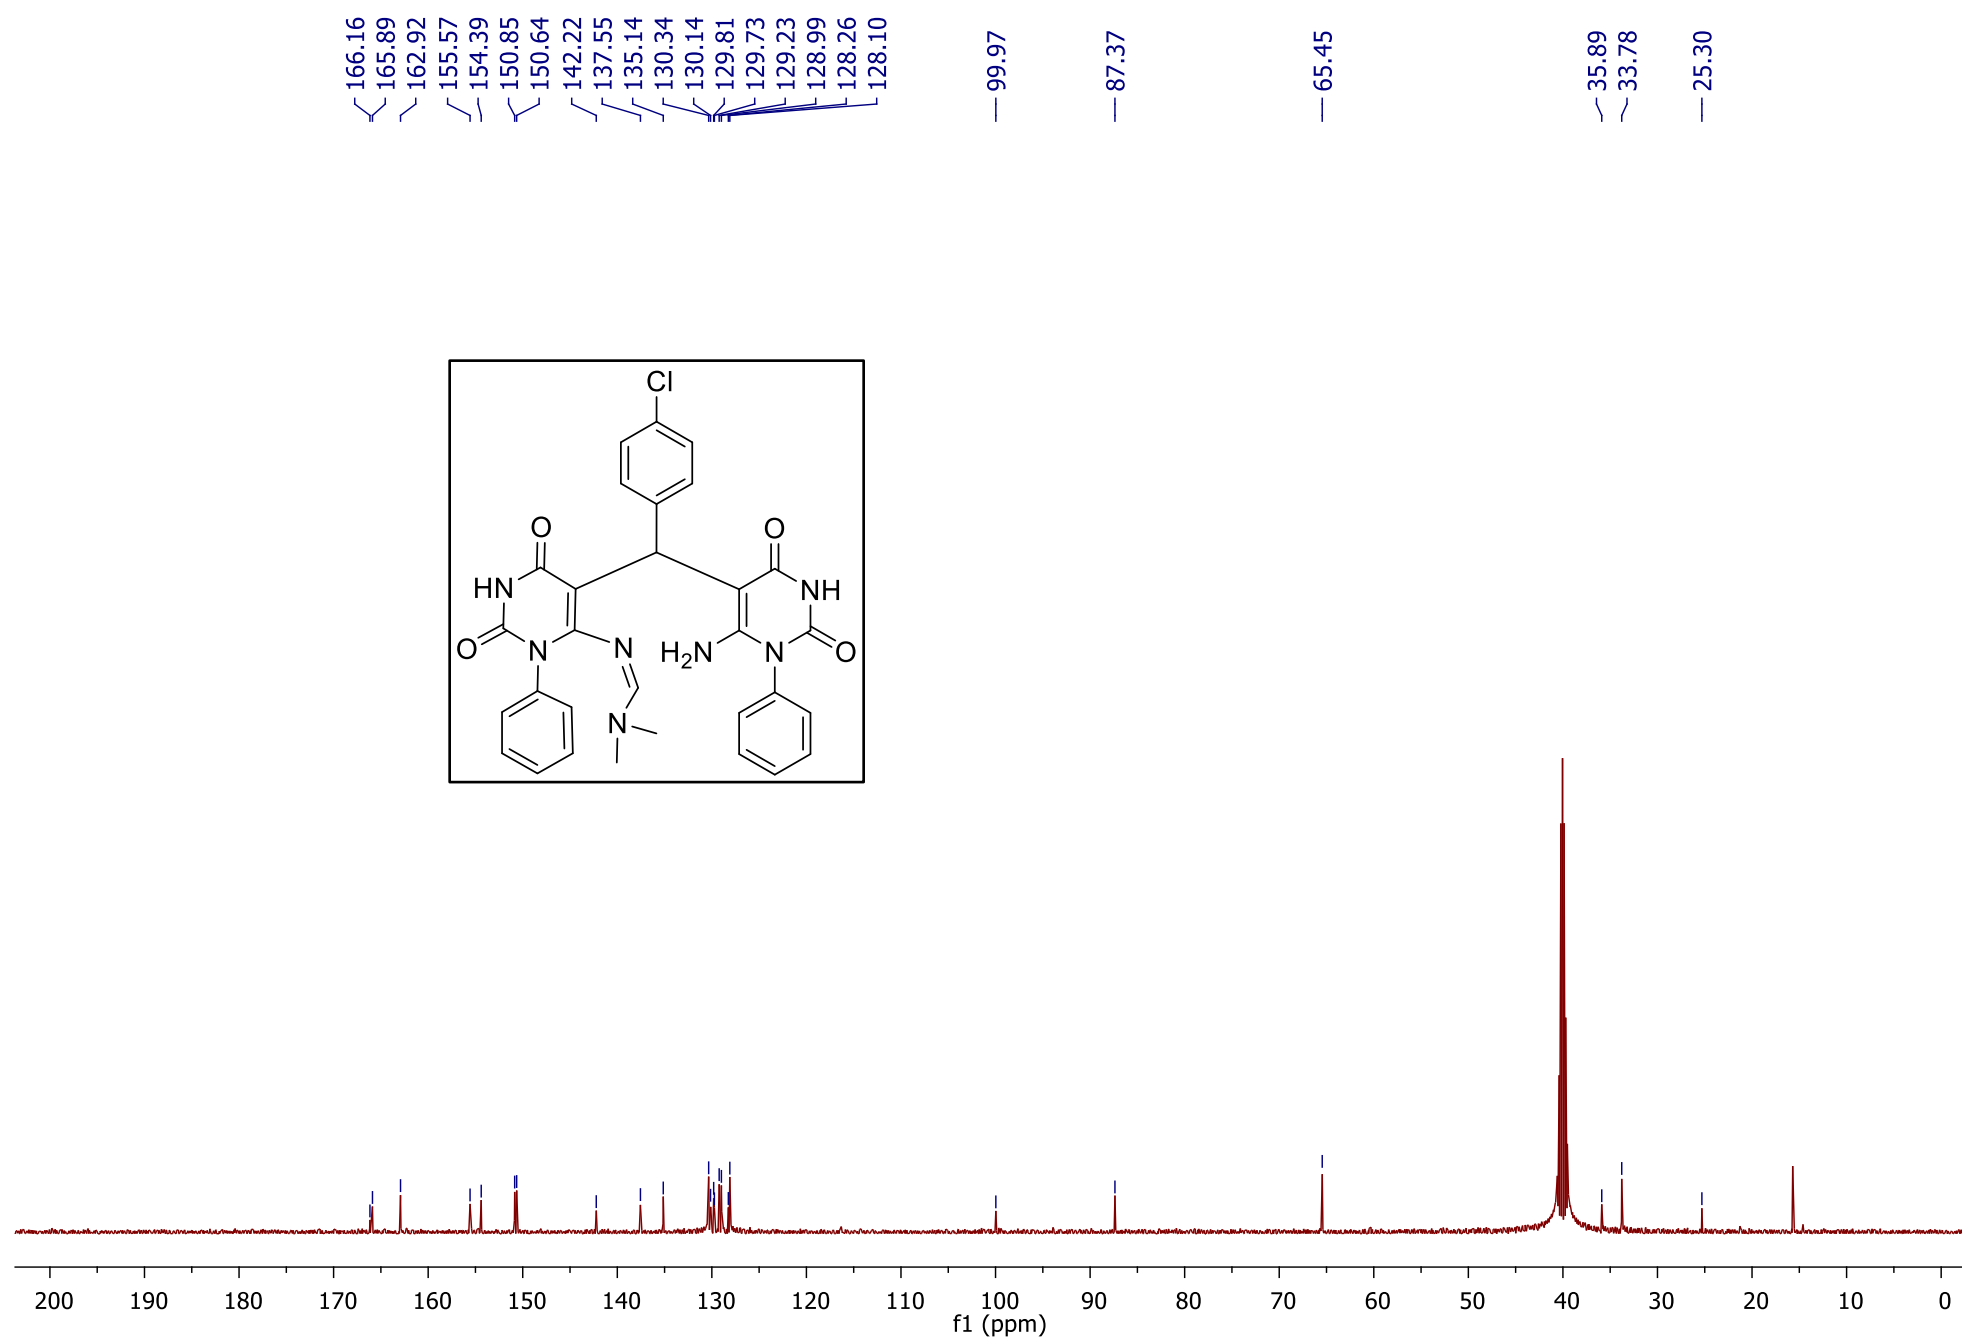

Figure S96. <sup>13</sup>C-NMR (DMSO-d<sub>6</sub>) spectra of compound **5da**.

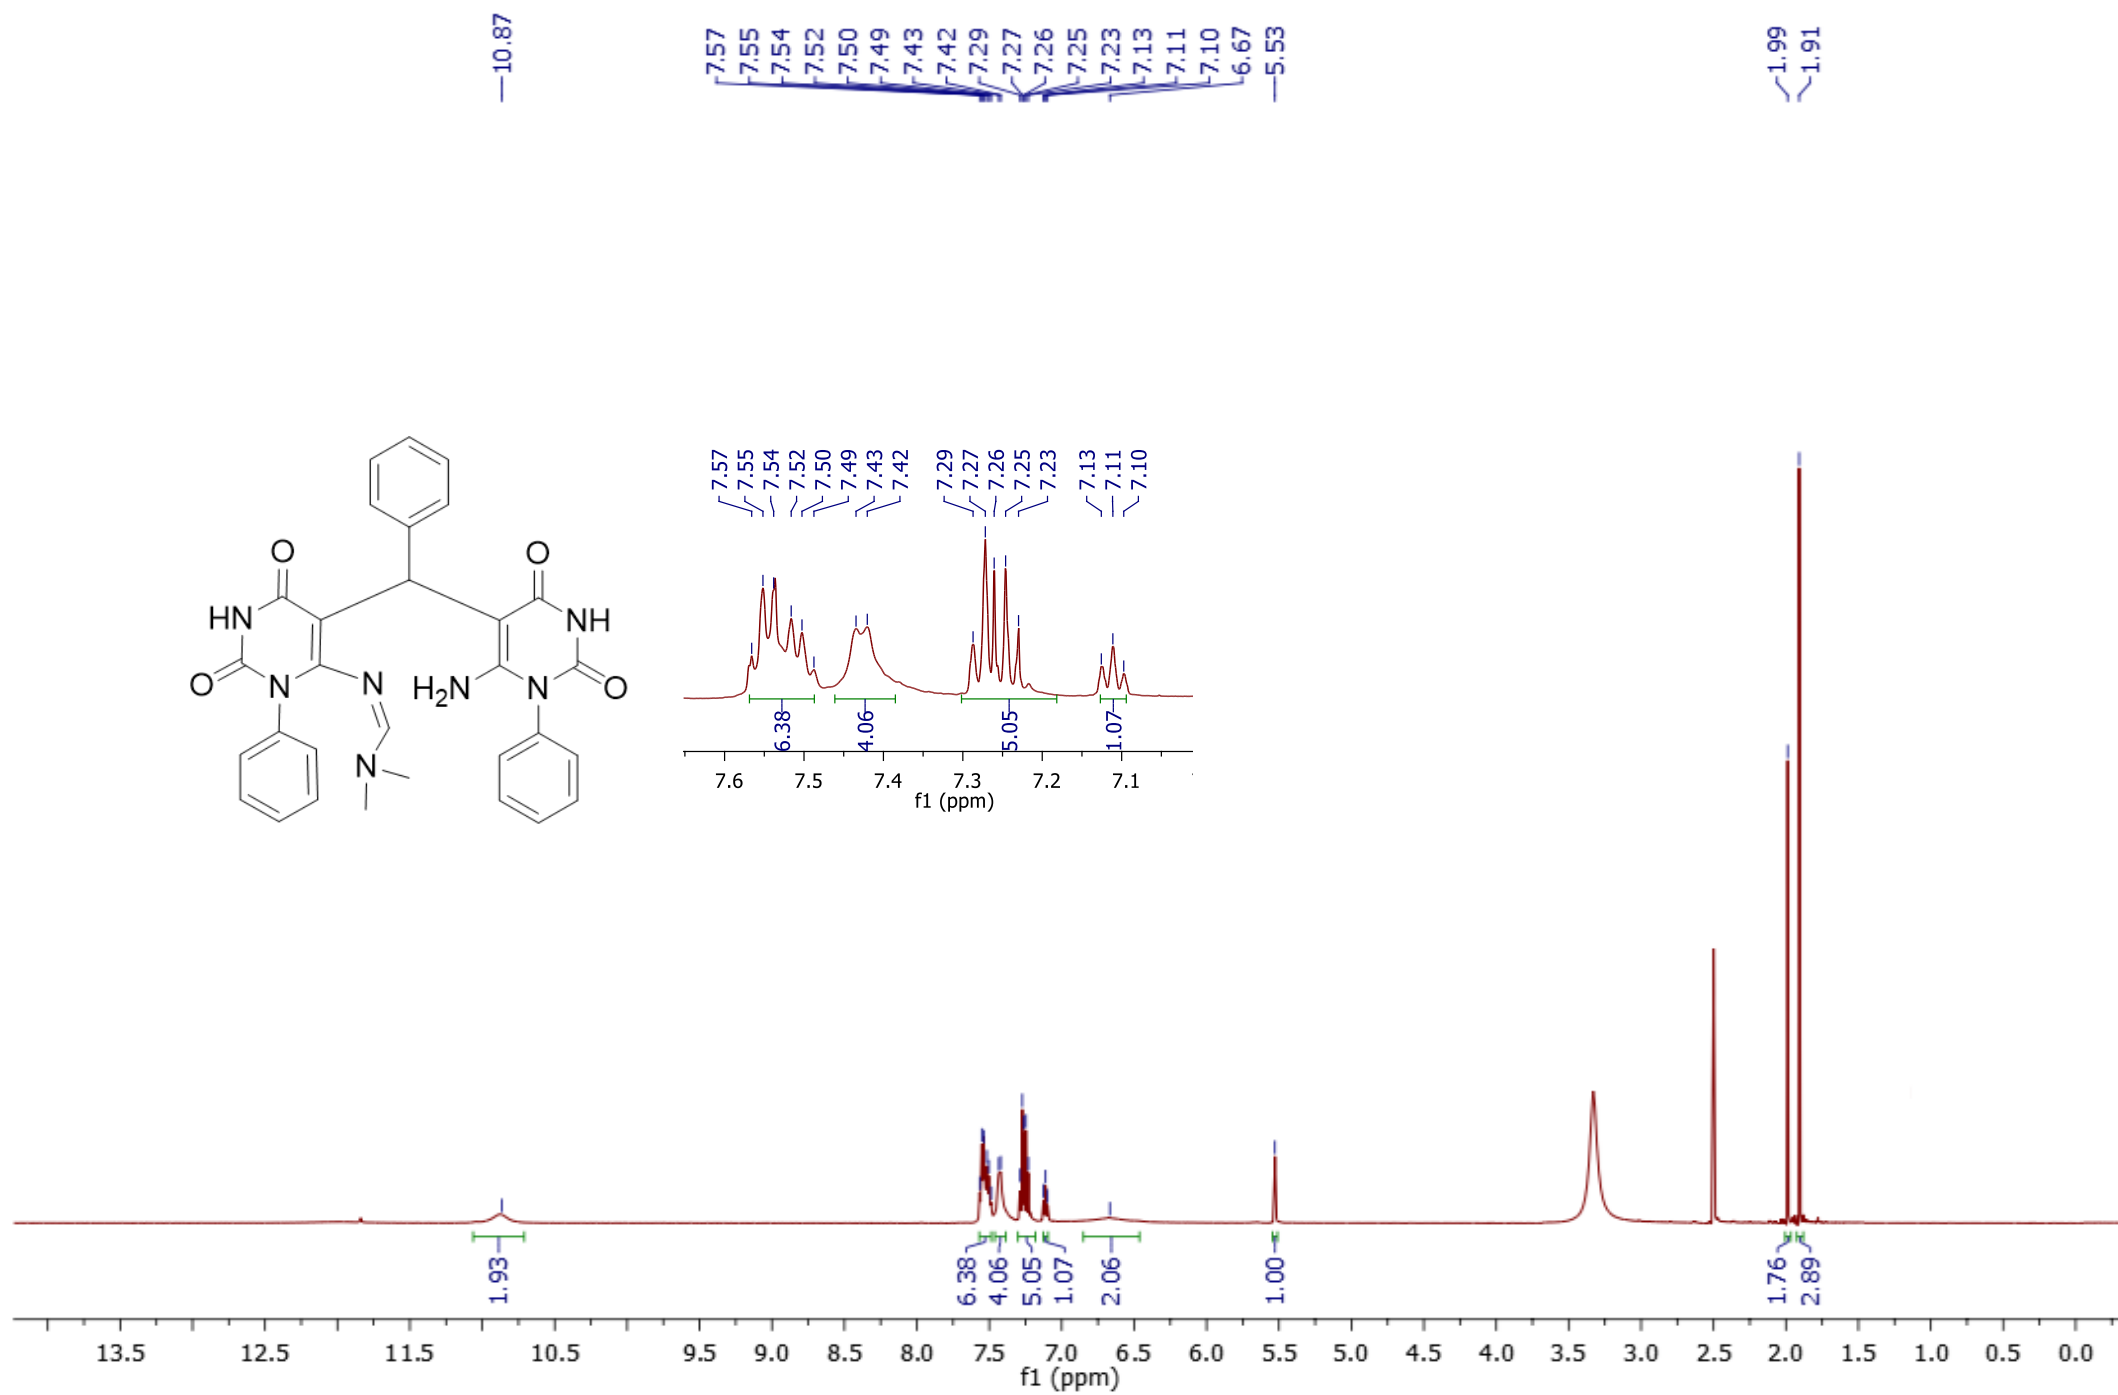

Figure S97.  $^1\text{H-NMR}$  (DMSO- $d_6$ ) spectra of compound **5db**.

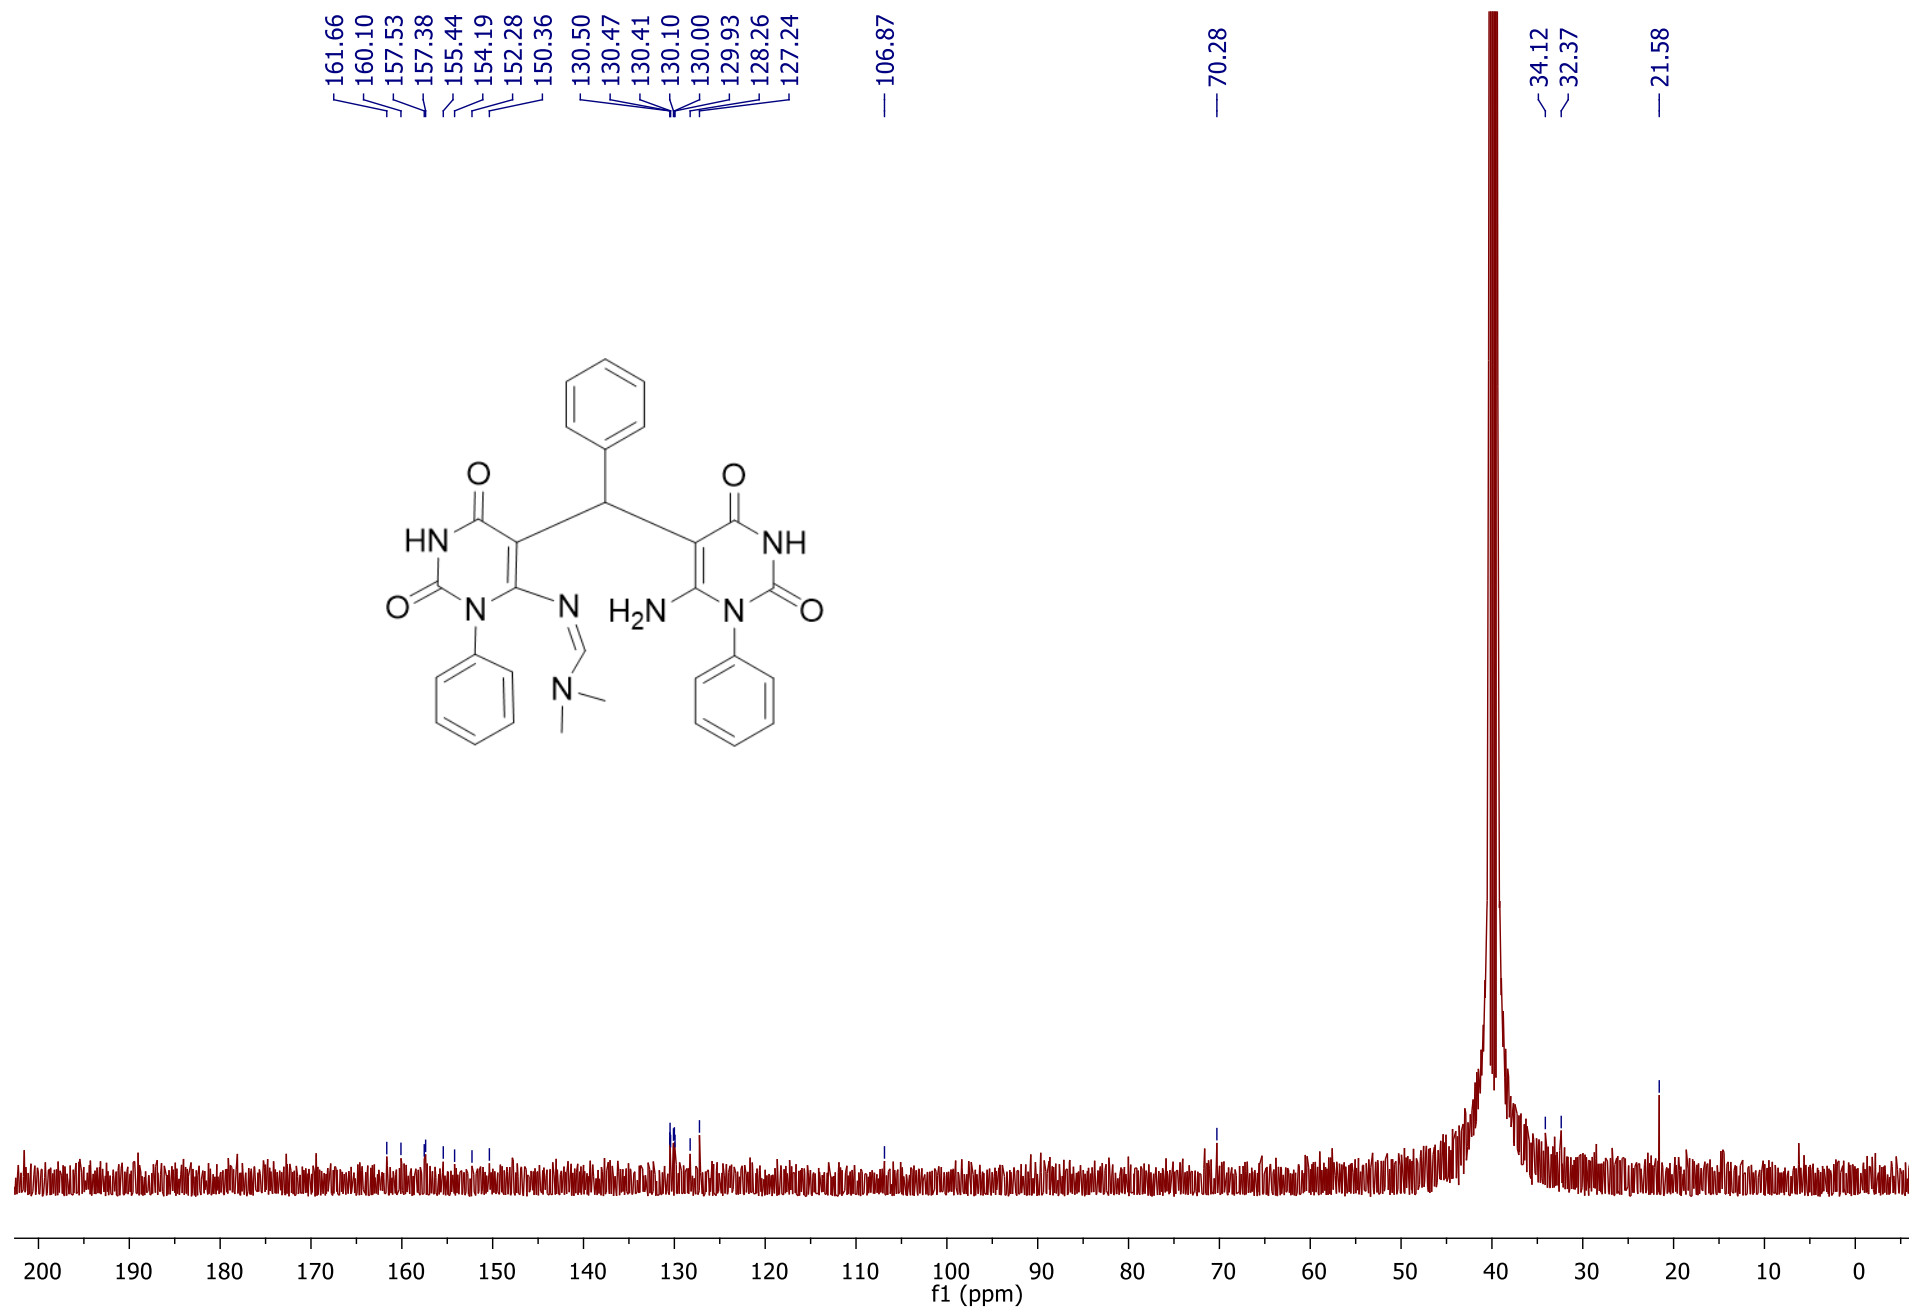

**Figure S98.** <sup>13</sup>C-NMR (DMSO-d<sub>6</sub>) spectra of compound **5db**.

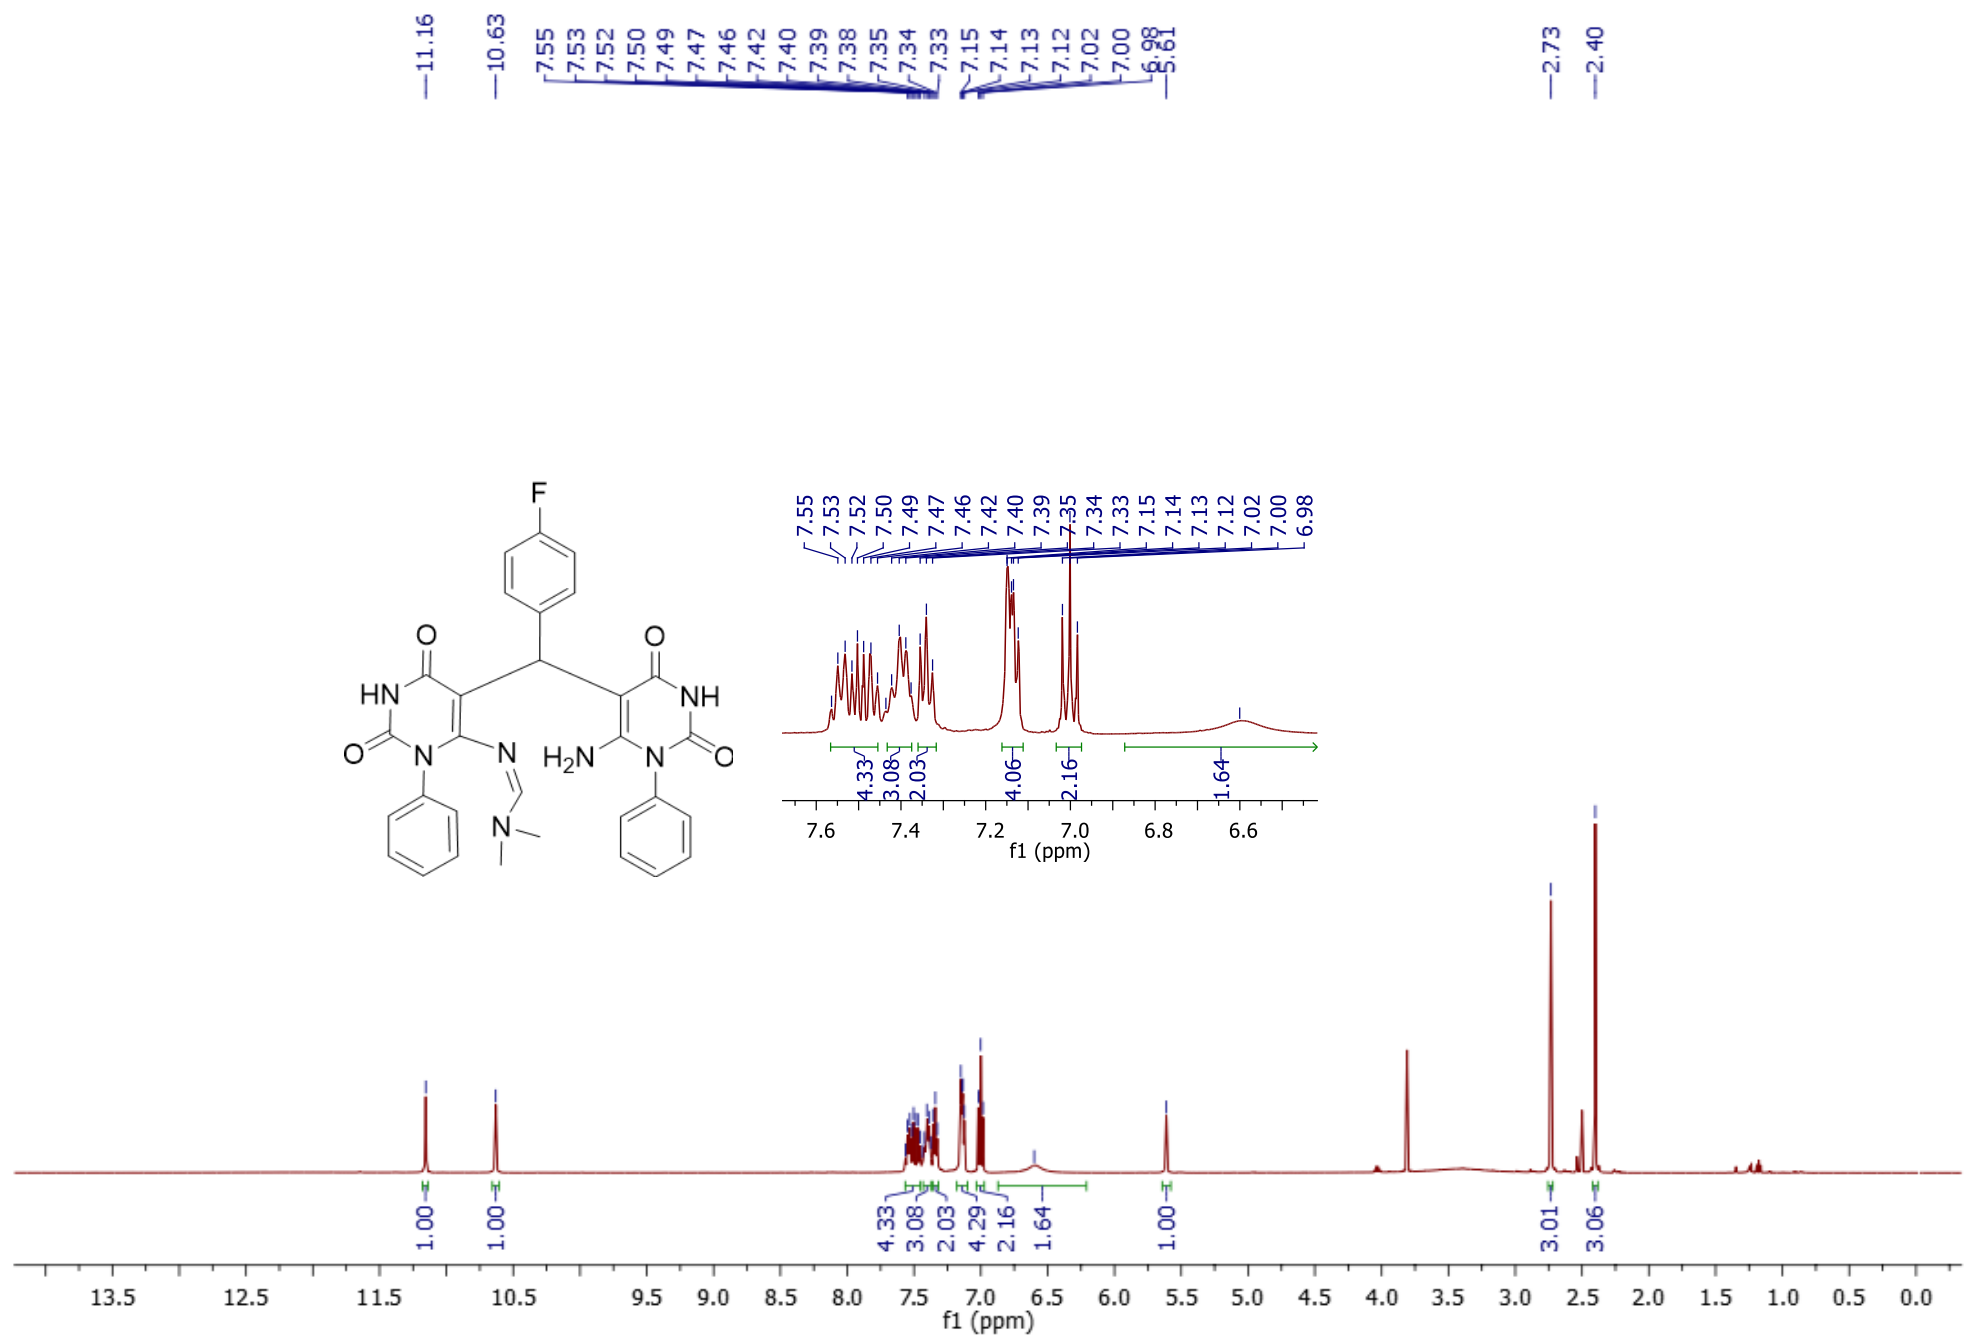

Figure S99.  $^1\text{H-NMR}$  (DMSO- $d_6$ ) spectra of compound **5dc**.

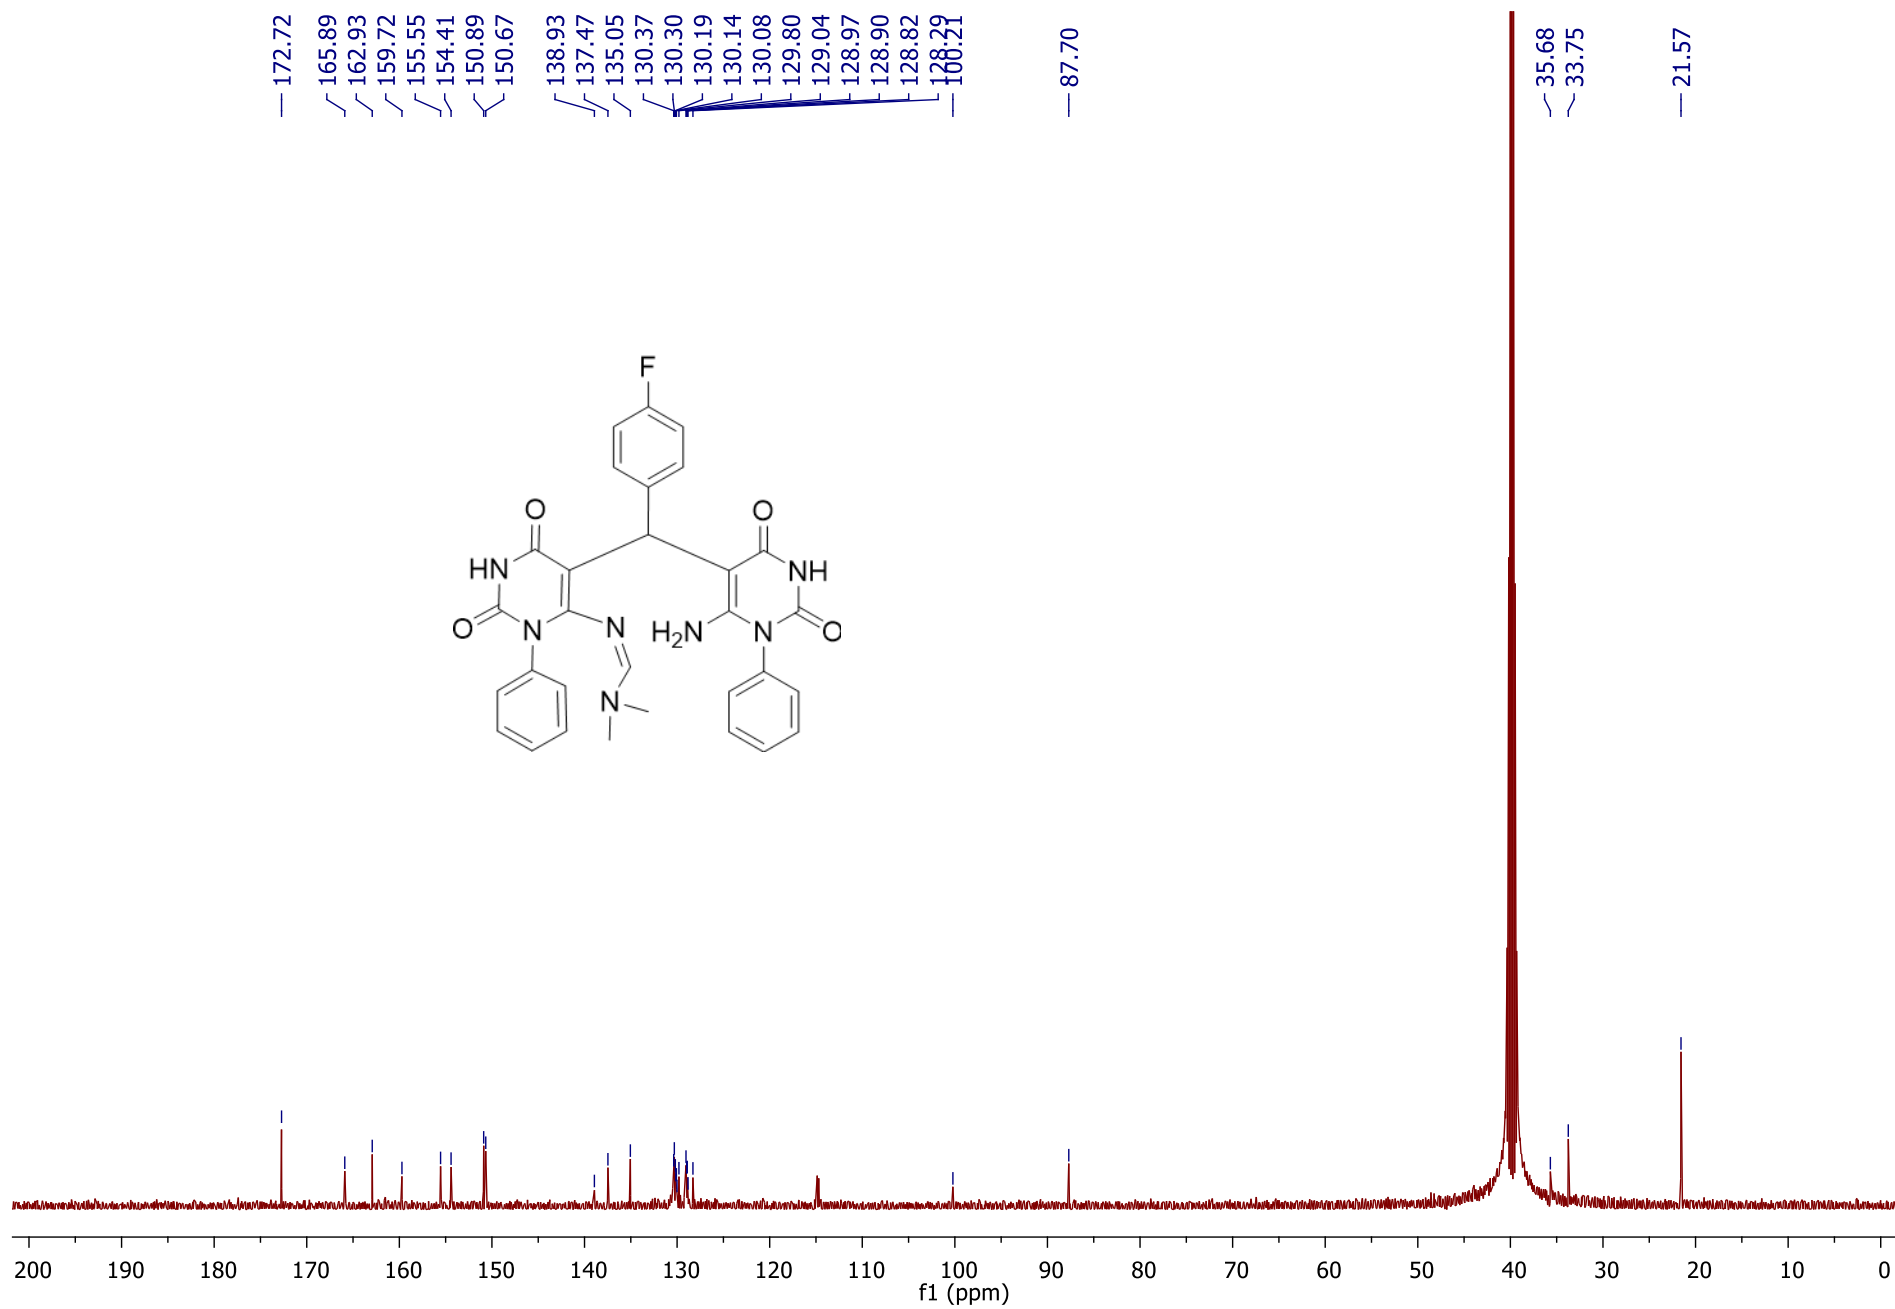

Figure S100. <sup>13</sup>C-NMR (DMSO-d<sub>6</sub>) spectra of compound **5dc**.

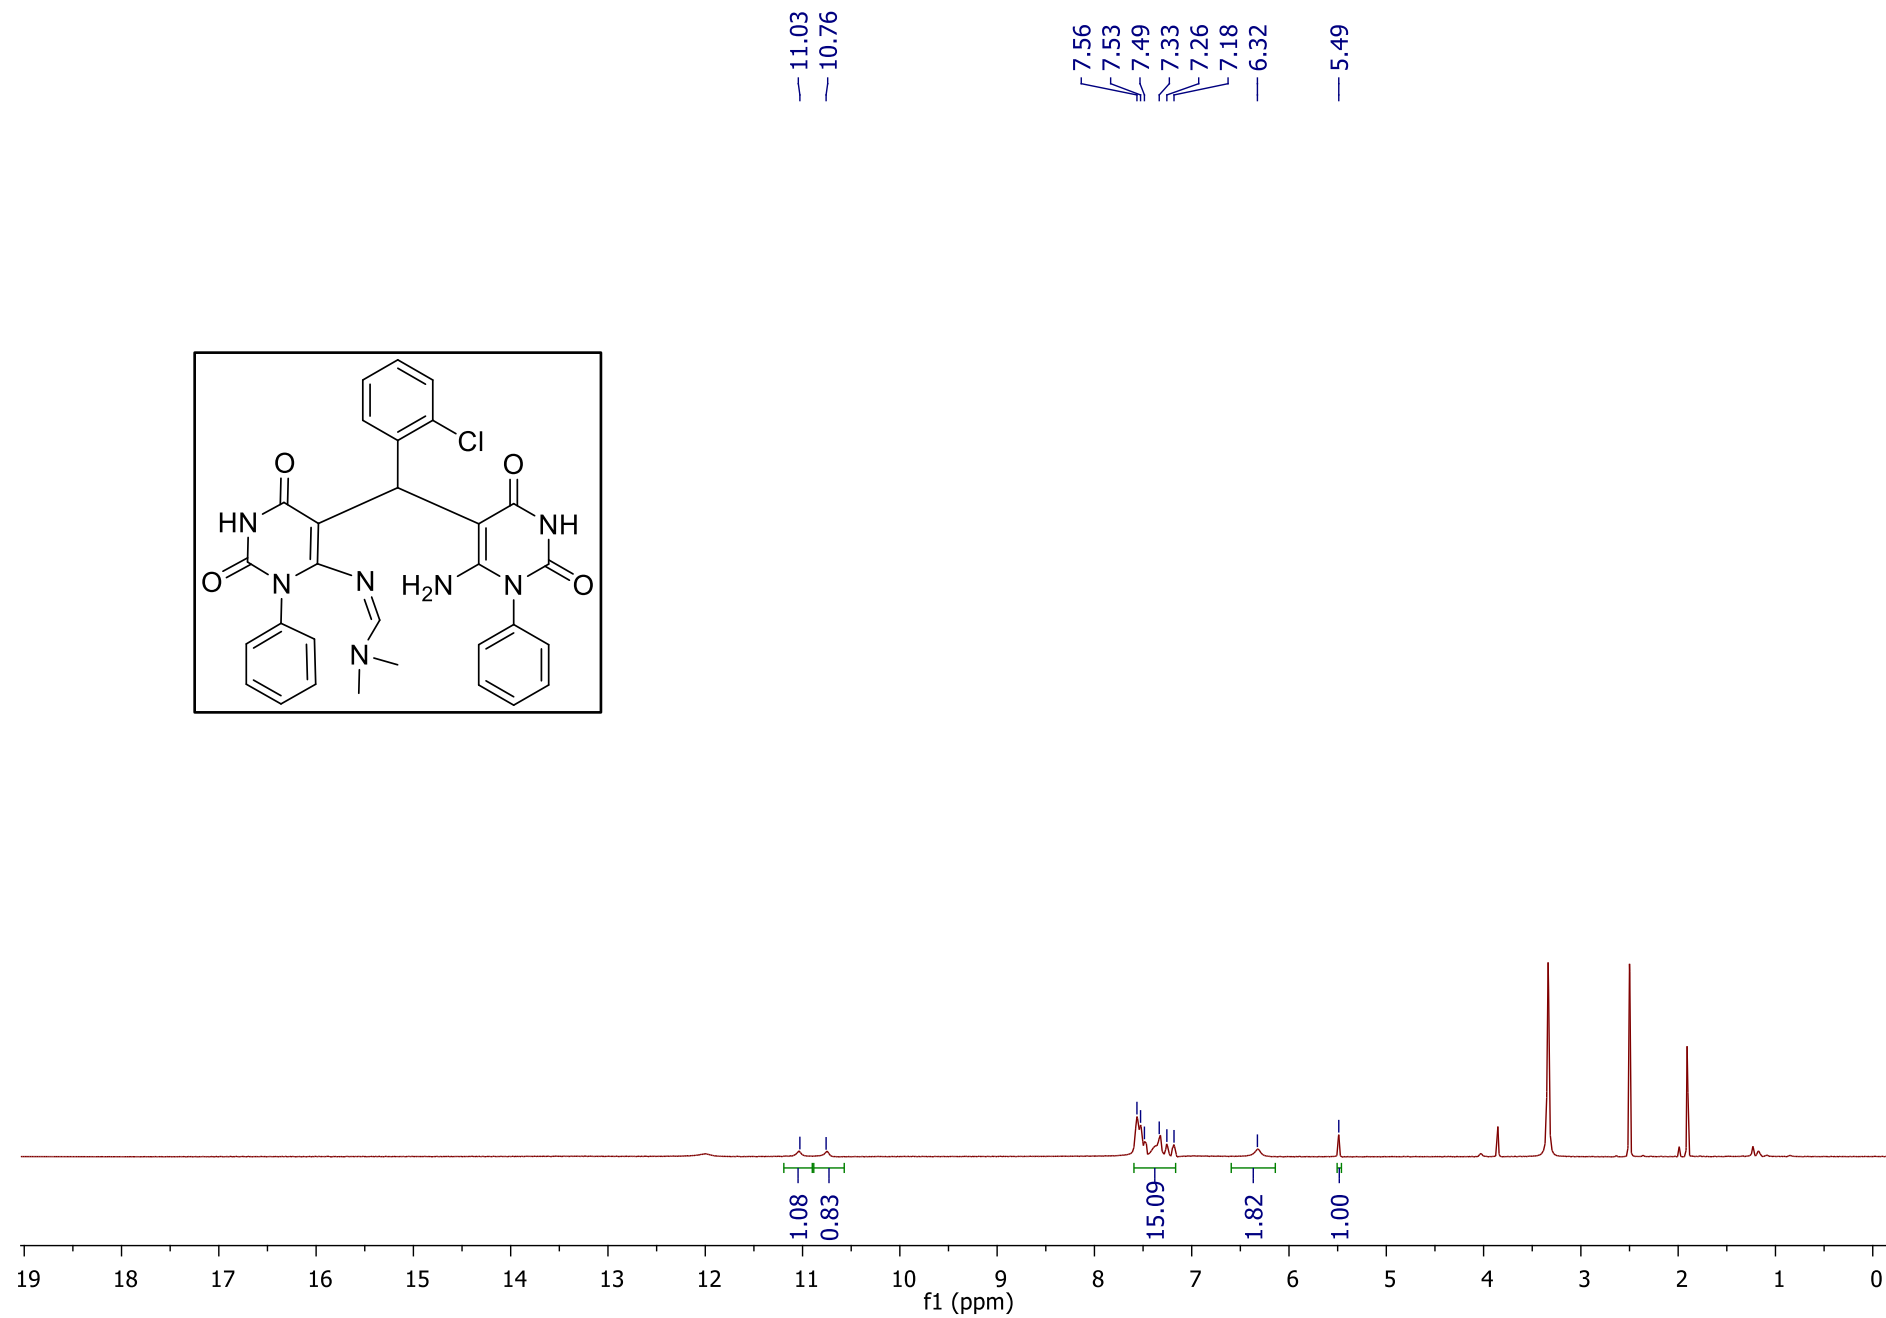

**Figure S101.** <sup>1</sup>H-NMR (DMSO-d<sub>6</sub>) spectra of compound **5dd**.

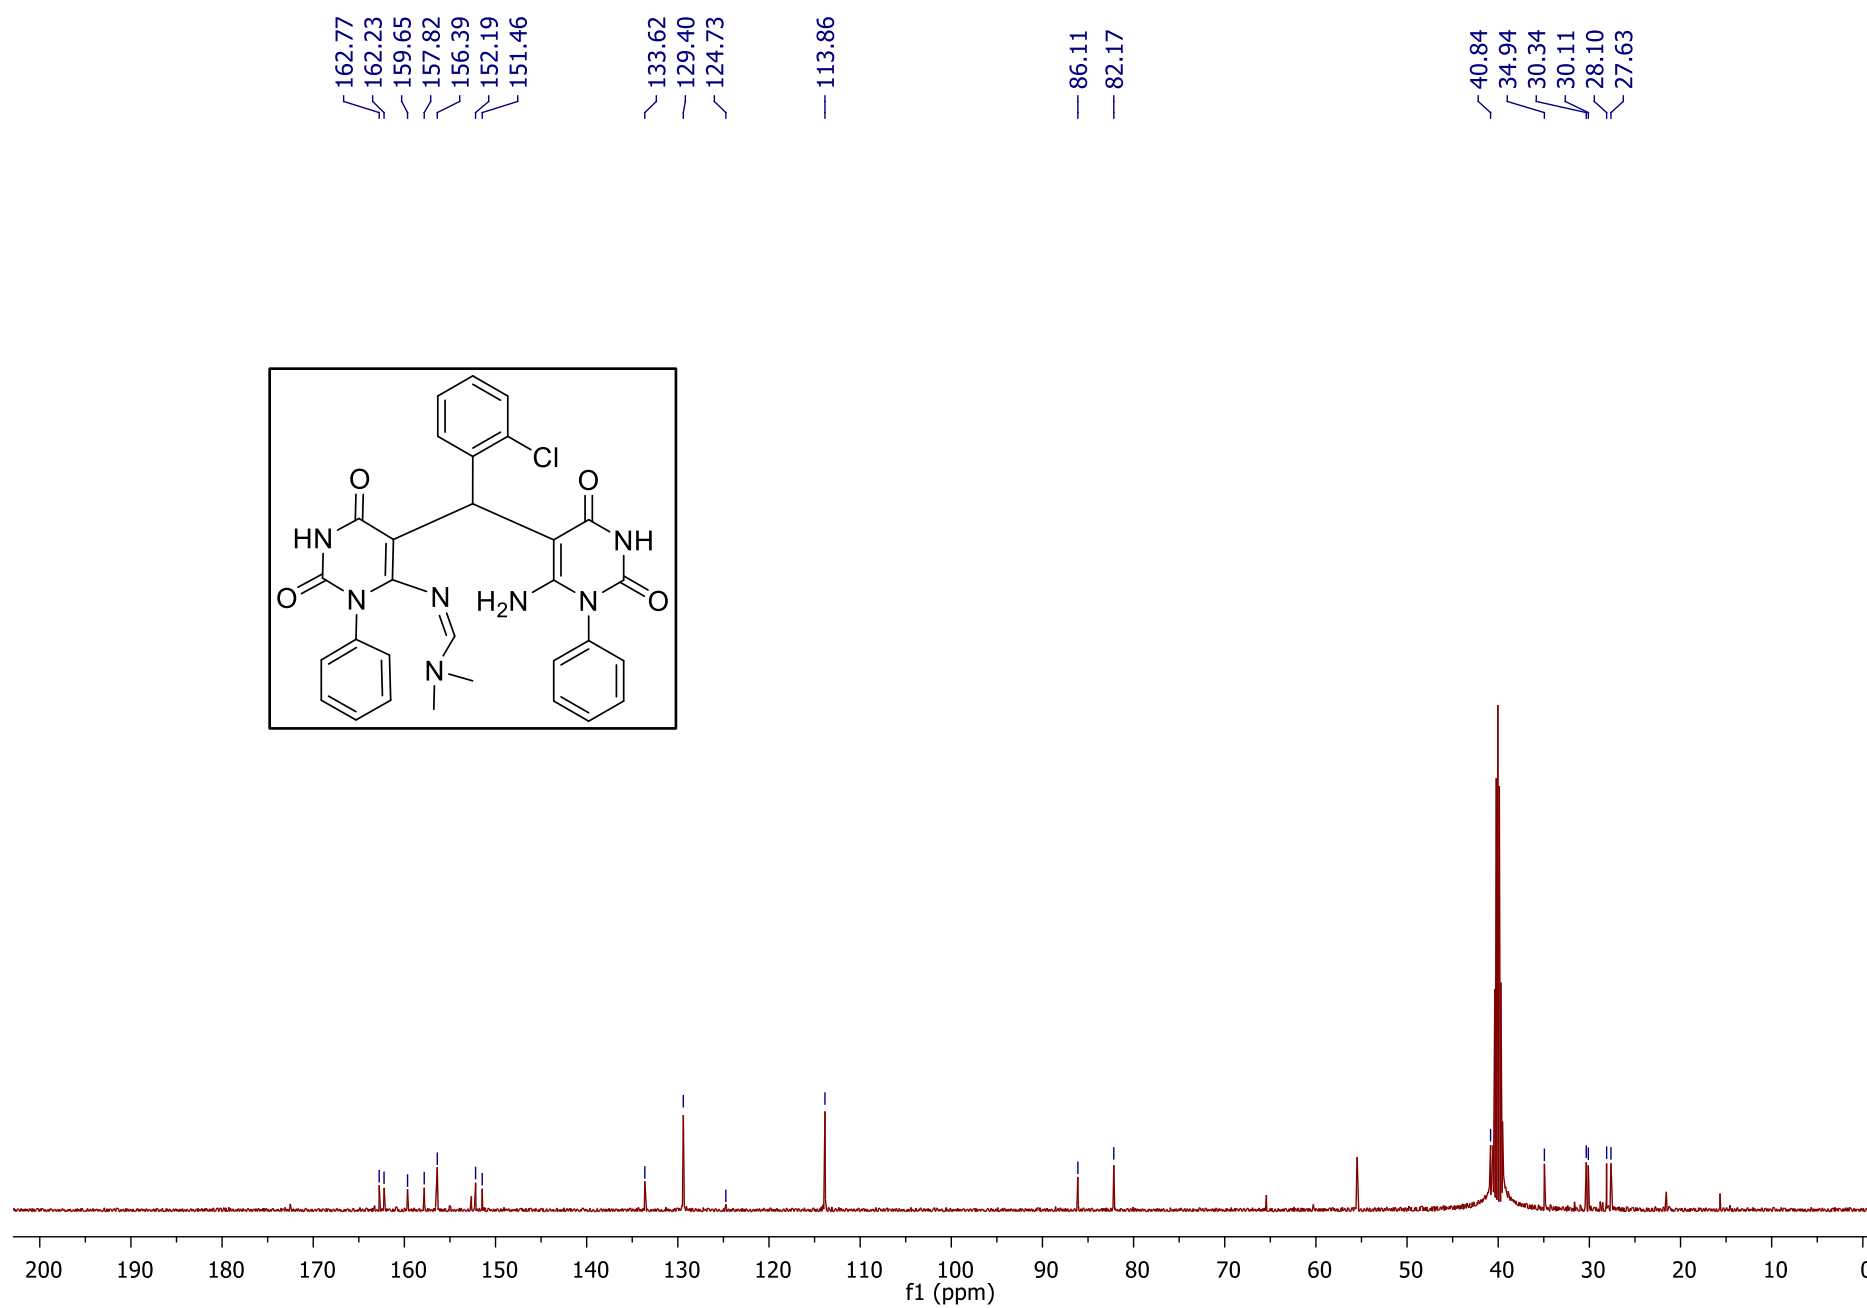

Figure S102. <sup>13</sup>C-NMR (DMSO-d<sub>6</sub>) spectra of compound **5dd**.

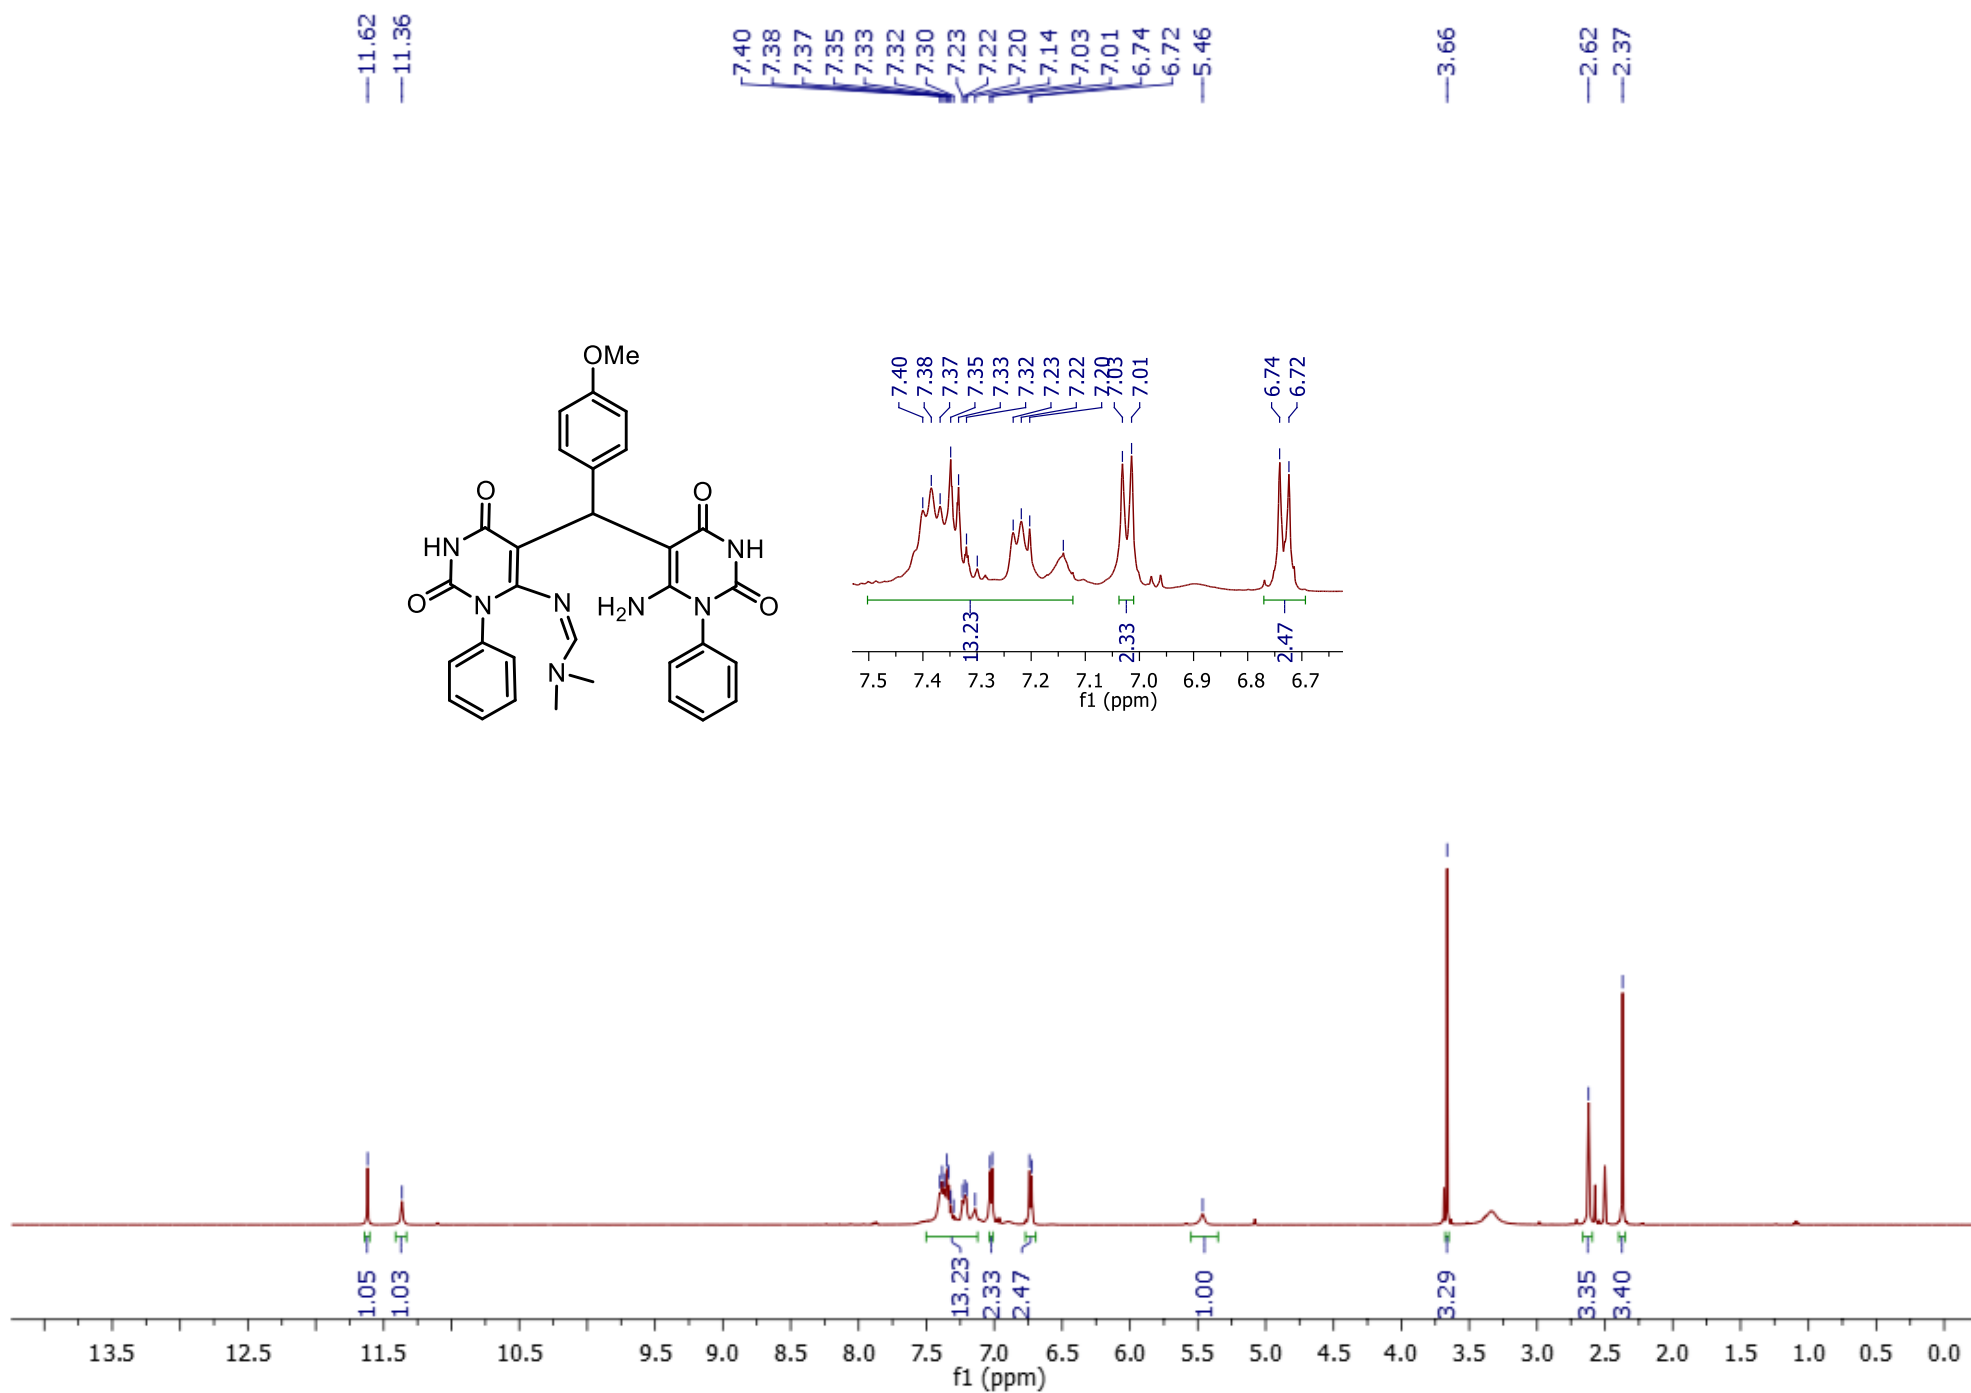

Figure S103.  $^1\text{H-NMR}$  (DMSO- $d_6$ ) spectra of compound **5dd**.

162.76  
162.06  
159.64  
156.39  
155.10  
152.07  
142.06  
129.17  
125.64  
120.66  
85.64  
82.18  
40.84  
34.94  
30.32  
27.63

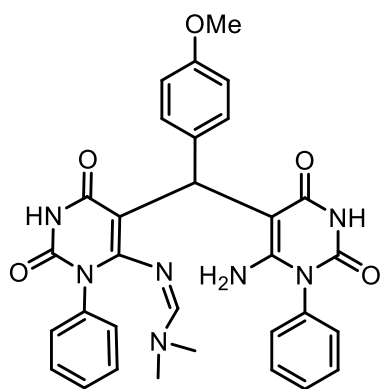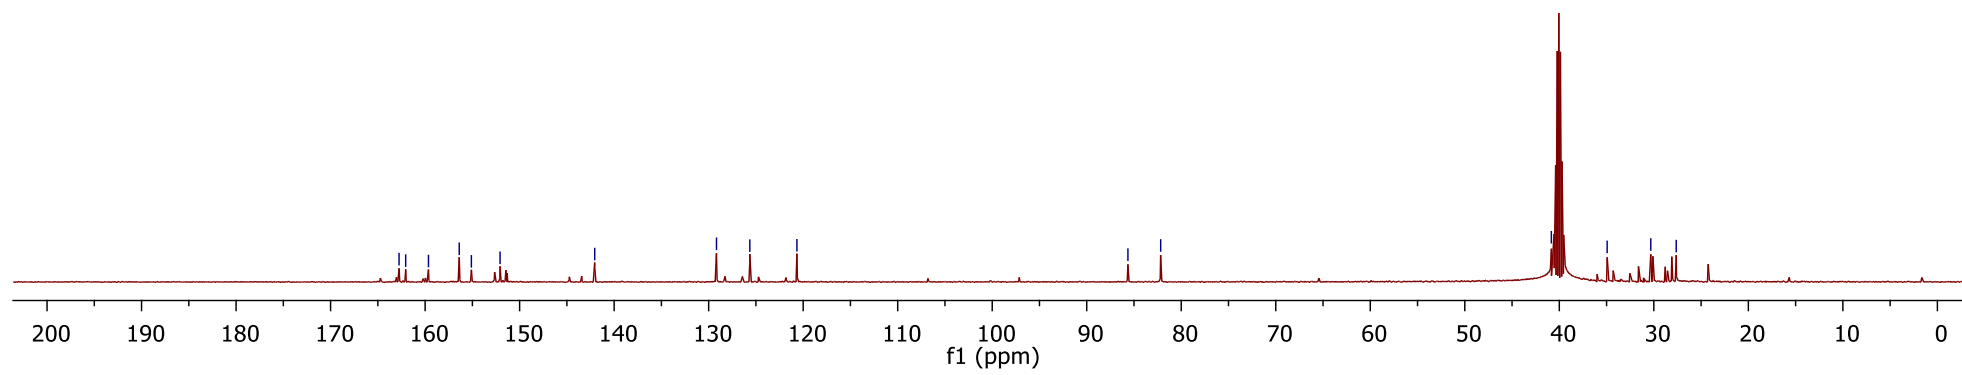

Figure S104. <sup>13</sup>C-NMR (DMSO-d<sub>6</sub>) spectra of compound 5de.
